# Supplementary material for: Comparative transcriptome analysis to identify the important mRNA and lncRNA associated with salinity tolerance in alfalfa
Source: PeerJ. 2024 Oct 16;12:e18236. doi: 10.7717/peerj.18236 (PMC11490228; doi:10.7717/peerj.18236)
Supplement: Supplemental Information 2 [file peerj-12-18236-s002.xlsx]

## Sheet: SUM
Comparative transcriptome analysis to identify the important mRNA and lncRNA associated with salinity tolerance in alfalfa
Gaimei Yang, Zhengyan Li, Mengru Rong, Rugang Yu,Qiting Zhang, Guoliang Wang, Zhiming Xu, Xueling Du, Wenkang Li
Supplementary materials: This excel file contains all of the additional Tables (Table S1–11) associated with the manuscript. Each table is in a different sheet. Table numbers and titles are listed below:
Table S1. Primers used for RT-qPCR analysis.
Table S2. The detailed information of RNA sequencing.
Table S3. List of differentially expressed mRNAs (DE mRNAs) in four groups based on pairwise comparisons.
Table S4. List of differentially expressed lncRNAs (DE lncRNAs) in four groups based on pairwise comparisons.
Table S5. The enriched GO terms of all DE mRNAs in four comparisons.
Table S6. DE mRNAs involved in the signal transduction pathway in four comparisons.
Table S7. DE mRNAs involved in the biosynthesis of compatible solutes/osmolytes in four comparisons.
Table S8. DE mRNAs involved in antioxidative defense in four comparisons.
Table S9. TFs that are differentially expressed in four comparisons.
Table S10. DE mRNAs encoding ions transport in four comparisons.
Table S11. The six DE lncRNAs and DE mRNAs co-expression networks.

## Sheet: Table S1.
Table S1. Primers used for RT-qPCR analysis.
Gene ID	Gene description	Forward primer (5'-3')	Reverse primer (5'-3')
mRNA
MS.gene002188	PP2C71	ATTCTTCACCTTCACCACTA	ACCTTCTTCATCAACAACAC
MS.gene017713	CRK1	TCAGTCCAAGTCCATTACC	GCTTCATTAGGCTTCACAG
MS.gene24334	CRK26	AGGTGGAAGAGTTGTTAGG	CTGGTGAGGAAGTGTTAGT
MS.gene69874	PUB17	TCAATCCTCTTCTCCTCTTC	TCTATCACAACTCATCCTTCA
MS.gene59642	APX3	GAACTCTATGCTAAGGATGA	CAAGTAAGTAACCCAGGAT
MS.gene64012	HXK2	CTGGAACTGTAGGAAGAGAT	AGCATCATTGTCGTAGTATTC
MS.gene002000	ARF1	TTGCGTCCAGATAGAGTT	AGAAGAATCGGTCATTGTTG
MS.gene88214	NAC90	AACTACTGCTTGTGGGTATTGG	TGGCTCTGTATTCATTCATCTTCC
MS.gene06955	CNGC1	TGGAGGAGATGAGAGTGA	GCAGAGATGACGCTTAATG
lncRNA
TCONS_00297228	PP2C71	TTCATCAAACTTCATCATACC	AACAGAATCAGCAACTCA
TCONS_00033214	CNGC1	TGTTTGGCTGGTCTGTTA	TTAGTGGTGTGGAAGTGC
TCONS_00285177	CNGC1	ACAACACCACAACACATC	CCATTACCACATCTTCCTTC
	Actin	ACGAGCGTTTCAGATG	ACCTCCGATCCAGACA

## Sheet: Table S2.
Table S2. The detailed information of RNA sequencing
Sample	Raw reads	Clean reads	Raw bases (G)	Clean bases (G)	Error rate (%)	Q20 (%)	Q30 (%)	GC content (%)	Total mapped (%)
G3 150 1	106774256	106085034	16.02	15.91	0.03	97.89	93.47	42.13	71846048 (67.72%)
G3 150 2	80691030	80182796	12.1	12.03	0.03	97.87	93.43	43.23	42502171 (53.01%)
G3 CK1	94085478	93453440	14.11	14.02	0.03	97.97	93.65	42.38	70565330 (75.51%)
G3 CK2	91985906	91390078	13.8	13.71	0.03	97.8	93.28	42.14	64994064 (71.12%)
G5 150 1	84092902	83372952	12.61	12.51	0.03	97.8	93.26	42.1	61245882 (73.46%)
G5 150 2	99415324	98681132	14.91	14.8	0.03	97.89	93.46	42.06	74897402 (75.9%)
G5 CK1	81590954	80895224	12.24	12.13	0.03	97.88	93.46	42.78	59343480 (73.36%)
G5 CK2	83434502	82895148	12.52	12.43	0.03	97.87	93.42	41.93	64305650 (77.57%)

## Sheet: Table S3.
Table S3. List of differentially expressed mRNAs (DE mRNAs) in four groups based on pairwise comparisons. Items highlighted in red mean up-regulated, while in green mean down-regulated.
Gene ID	Gene name	gene_locus	Length	FPKM Value								log2 FoldChange				P-value				Padj-value				Gene description
				G3150/G30		G5150/G50		G50/G30		G5150/G3150
				G3150	G30	G5150	G50	G50	G30	G5150	G3150	G3150/G30	G5150/G50	G50/G30	G5150/G3150	G3150/G30	G5150/G50	G50/G30	G5150/G3150	G3150/G30	G5150/G50	G50/G30	G5150/G3150
MS.gene052989	MS.gene052989	chr2.1:49131253-49133440	993	5.63193	0.108878	7.02399	0.0193995	0.0193995	0.108878	7.02399	5.63193	5.60623	8.25026	-2.2519	0.341839	1.63156e-05	1.5032e-05	0.327241	0.766585	0.00789127	0.00683667	1	1	gnl|BL_ORD_ID|62780 sp|P17541|CHIA_CUCSA Acidic endochitinase OS=Cucumis sativus OX=3659 PE=1 SV=1//7.27966e-94
MS.gene73434	MS.gene73434	chr1.4:83736043-83737607	588	1.46552	0	1.7457	0.0105085	0.0105085	0	1.7457	1.46552	9.79427	6.66292	3.38126	0.262488	4.24659e-05	0.000172326	0.767158	0.813771	0.0164593	0.0396193	1	1	gnl|BL_ORD_ID|448158 sp|P55853|SUMO_CAEEL Small ubiquitin-related modifier OS=Caenorhabditis elegans OX=6239 GN=smo-1 PE=1 SV=1//6.72837e-07
MS.gene047518	MS.gene047518	chr2.1:72059782-72063053	978	11.6955	0	19.9446	0	#N/A	#N/A	19.9446	11.6955	13.835	14.597	#N/A	0.798315	5.4066e-05	4.03313e-16	#N/A	0.652346	0.0200368	5.7551e-12	#N/A	1	gnl|BL_ORD_ID|335403 sp|Q53FA7|QORX_HUMAN Quinone oxidoreductase PIG3 OS=Homo sapiens OX=9606 GN=TP53I3 PE=1 SV=2//9.3126e-78
MS.gene39589	MS.gene39589	chr4.2:24058913-24066821	1974	3.23354	0	7.32892	0	#N/A	#N/A	7.32892	3.23354	13.2885	14.4488	#N/A	1.17968	0.000101431	4.01523e-14	#N/A	0.515031	0.031469	3.39529e-10	#N/A	1	gnl|BL_ORD_ID|426939 sp|Q9I7W5|SAS10_DROME Something about silencing protein 10 OS=Drosophila melanogaster OX=7227 GN=Sas10 PE=1 SV=2//1.17198e-11
MS.gene08957	MS.gene08957	chr4.4:14731778-14739702	2295	3.50037	0	6.30798	0	#N/A	#N/A	6.30798	3.50037	13.406	14.2094	#N/A	0.832624	9.35411e-05	5.00951e-15	#N/A	0.640541	0.030017	5.71868e-11	#N/A	1	gnl|BL_ORD_ID|234496 sp|Q6NTR1|MET13_XENLA Methyltransferase-like protein 13 OS=Xenopus laevis OX=8355 GN=mettl13 PE=2 SV=1//4.64801e-84
MS.gene54436	MS.gene54436	chr7.3:91202009-91210746	1444	7.01924	0	5.67192	0	#N/A	#N/A	5.67192	7.01924	14.5506	14.1617	#N/A	-0.346386	4.75197e-05	6.11817e-05	#N/A	0.897199	0.0180503	0.019412	#N/A	1	gnl|BL_ORD_ID|466845 sp|Q9M888|TCPZA_ARATH T-complex protein 1 subunit zeta 1 OS=Arabidopsis thaliana OX=3702 GN=CCT6A PE=1 SV=1//0
MS.gene024631	MS.gene024631	chr7.4:3003916-3005783	459	39.1237	0	20.9001	0	#N/A	#N/A	20.9001	39.1237	14.785	13.8985	#N/A	-0.870437	5.17519e-17	7.13622e-05	#N/A	0.63041	1.4768e-12	0.0214381	#N/A	1	gnl|BL_ORD_ID|438914 sp|Q02610|SODC_PEA Superoxide dismutase [Cu-Zn] OS=Pisum sativum OX=3888 GN=SODCC PE=2 SV=2//1.19967e-95
MS.gene071437	MS.gene071437	chr4.4:17289656-17296000	1338	4.2794	0	6.31691	0	#N/A	#N/A	6.31691	4.2794	13.3753	13.8555	#N/A	0.522594	9.52326e-05	7.25663e-05	#N/A	0.841247	0.0303216	0.0216856	#N/A	1	gnl|BL_ORD_ID|50676 sp|Q8LBH2|CAP8_ARATH Putative clathrin assembly protein At2g01600 OS=Arabidopsis thaliana OX=3702 GN=At2g01600 PE=2 SV=2//0
MS.gene76289	MS.gene76289	chr1.1:78465047-78468802	1194	8.39403	0	9.62824	0	#N/A	#N/A	9.62824	8.39403	13.5557	13.7882	#N/A	0.252922	6.49646e-05	7.62326e-05	#N/A	0.920971	0.023029	0.0225744	#N/A	1	gnl|BL_ORD_ID|341880 sp|Q84L30|RD23D_ARATH Ubiquitin receptor RAD23d OS=Arabidopsis thaliana OX=3702 GN=RAD23D PE=1 SV=2//1.98044e-160
MS.gene054537	MS.gene054537	chr4.1:87894735-87900928	1095	3.835	0	5.4155	0	#N/A	#N/A	5.4155	3.835	13.1475	13.6801	#N/A	0.553105	8.71887e-05	8.20561e-05	#N/A	0.826755	0.0286392	0.0237747	#N/A	1	gnl|BL_ORD_ID|289287 sp|Q9SZ53|P2C60_ARATH Probable protein phosphatase 2C 60 OS=Arabidopsis thaliana OX=3702 GN=At4g31860 PE=2 SV=1//0
MS.gene015186	MS.gene015186	chr5.1:8985143-8991415	606	9.84226	0	5.26146	0	#N/A	#N/A	5.26146	9.84226	14.5493	13.6565	#N/A	-0.878504	2.02714e-15	8.36788e-05	#N/A	0.627737	2.43565e-11	0.0241429	#N/A	1	gnl|BL_ORD_ID|427974 sp|Q42551|SCE1_ARATH SUMO-conjugating enzyme SCE1 OS=Arabidopsis thaliana OX=3702 GN=SCE1 PE=1 SV=1//7.68767e-92
MS.gene034493	MS.gene034493	chr1.1:40512755-40531936	6144	3.07529	0	1.56016	0	#N/A	#N/A	1.56016	3.07529	14.4771	13.5155	#N/A	-0.945465	3.25368e-16	9.13391e-05	#N/A	0.597114	6.07717e-12	0.0256822	#N/A	1	gnl|BL_ORD_ID|304757 sp|Q7X9V2|PIE1_ARATH Protein PHOTOPERIOD-INDEPENDENT EARLY FLOWERING 1 OS=Arabidopsis thaliana OX=3702 GN=PIE1 PE=1 SV=1//8.61135e-95
MS.gene45408	MS.gene45408	chr8.3:79253285-79263681	1107	2.64653	0	2.8502	0	#N/A	#N/A	2.8502	2.64653	13.3597	13.5013	#N/A	0.162089	7.41032e-05	9.22094e-05	#N/A	0.948872	0.025593	0.0258632	#N/A	1	gnl|BL_ORD_ID|207940 sp|O64888|KPRS5_ARATH Ribose-phosphate pyrophosphokinase 5, chloroplastic OS=Arabidopsis thaliana OX=3702 GN=PRS5 PE=2 SV=2//0
MS.gene21093	MS.gene21093	chr1.4:68125474-68129887	2979	5.68734	0	4.22591	0	#N/A	#N/A	4.22591	5.68734	13.2272	12.752	#N/A	-0.424147	8.18803e-05	0.000166126	#N/A	0.864598	0.0272881	0.0387423	#N/A	1	gnl|BL_ORD_ID|304465 sp|P15001|PHYA_PEA Phytochrome A OS=Pisum sativum OX=3888 GN=PHYA PE=3 SV=1//0
MS.gene012652	MS.gene012652	chr8.1:1758756-1761211	1386	6.00673	0	7.23817	0	#N/A	#N/A	7.23817	6.00673	12.4786	12.7257	#N/A	0.277426	2.12535e-10	3.83322e-11	#N/A	0.741605	4.25608e-07	1.01391e-07	#N/A	1	gnl|BL_ORD_ID|29212 sp|Q00624|ASOL_BRANA L-ascorbate oxidase homolog OS=Brassica napus OX=3708 GN=Bp10 PE=2 SV=1//5.20005e-163
MS.gene89704	MS.gene89704	chr4.4:5076571-5077497	591	15.9375	0	17.7407	0	#N/A	#N/A	17.7407	15.9375	12.4618	12.651	#N/A	0.209725	0.000178534	0.000188141	#N/A	0.931852	0.0483481	0.042207	#N/A	1	gnl|BL_ORD_ID|220246 sp|A0MFL4|LOR17_ARATH Protein LURP-one-related 17 OS=Arabidopsis thaliana OX=3702 GN=At5g41590 PE=2 SV=2//7.77636e-44
MS.gene54084	MS.gene54084	chr1.2:10137751-10152037	3183	1.25434	0	1.07729	0	#N/A	#N/A	1.07729	1.25434	12.7442	12.4995	#N/A	-0.203589	2.96387e-08	6.40422e-10	#N/A	0.856493	3.46984e-05	1.15131e-06	#N/A	1	gnl|BL_ORD_ID|122172 sp|Q8VY00|ESP3_ARATH Pre-mRNA-splicing factor ATP-dependent RNA helicase DEAH1 OS=Arabidopsis thaliana OX=3702 GN=ESP3 PE=1 SV=1//0
MS.gene021567	MS.gene021567	chr1.4:9975894-9984485	2820	1.81805	0	1.80038	0	#N/A	#N/A	1.80038	1.81805	12.5433	12.4834	#N/A	-0.00887419	0.000162157	4.39422e-05	#N/A	0.997196	0.0448167	0.0155303	#N/A	1	gnl|BL_ORD_ID|308441 sp|Q03194|PMA4_NICPL Plasma membrane ATPase 4 OS=Nicotiana plumbaginifolia OX=4092 GN=PMA4 PE=2 SV=1//0
MS.gene017692	MS.gene017692	chr7.1:17428980-17431018	1389	3.78173	0	5.41655	0	#N/A	#N/A	5.41655	3.78173	11.5433	12.0413	#N/A	0.527859	4.78656e-08	3.16733e-09	#N/A	0.553509	5.22832e-05	4.54807e-06	#N/A	1	gnl|BL_ORD_ID|56236 sp|P25011|CCNB1_SOYBN G2/mitotic-specific cyclin S13-6 OS=Glycine max OX=3847 PE=2 SV=1//9.26659e-167
MS.gene050771	MS.gene050771	51772:5316-8610	1236	0.66799	0	1.36646	0	#N/A	#N/A	1.36646	0.66799	9.74473	10.734	#N/A	1.02426	5.60427e-05	1.55643e-06	#N/A	0.353474	0.020569	0.00103904	#N/A	1	gnl|BL_ORD_ID|17958 sp|F4I562|AP3M_ARATH AP-3 complex subunit mu OS=Arabidopsis thaliana OX=3702 GN=AP3M PE=1 SV=1//0
MS.gene72812	MS.gene72812	chr5.1:17243543-17258538	2109	0.318178	0	0.299403	0	#N/A	#N/A	0.299403	0.318178	10.8568	10.7174	#N/A	-0.0999676	1.33476e-06	3.78277e-06	#N/A	0.927853	0.00097978	0.00223167	#N/A	1	gnl|BL_ORD_ID|233157 sp|Q9FT73|MED34_ARATH Mediator of RNA polymerase II transcription subunit 34 OS=Arabidopsis thaliana OX=3702 GN=MED34 PE=1 SV=1//0
MS.gene43495	MS.gene43495	chr8.4:187295-190345	1407	1.5457	0	1.18276	0	#N/A	#N/A	1.18276	1.5457	10.8314	10.4179	#N/A	-0.378078	1.68118e-06	4.48167e-06	#N/A	0.721409	0.00118822	0.00252648	#N/A	1	gnl|BL_ORD_ID|106692 sp|Q9LQ55|DRP2B_ARATH Dynamin-2B OS=Arabidopsis thaliana OX=3702 GN=DRP2B PE=1 SV=2//0
MS.gene054111	MS.gene054111	chr1.3:14367312-14380881	2097	0.626609	0	0.145387	0	#N/A	#N/A	0.145387	0.626609	11.6789	9.57802	#N/A	-2.07499	5.11624e-08	7.79975e-05	#N/A	0.0566737	5.50935e-05	0.0229187	#N/A	1	gnl|BL_ORD_ID|223321 sp|P93604|LRK10_WHEAT Rust resistance kinase Lr10 OS=Triticum aestivum OX=4565 GN=LRK10 PE=2 SV=1//5.90136e-112
MS.gene08801	MS.gene08801	chr4.2:12995058-12999653	1203	0.0453085	7.31354	0	6.74448	6.74448	7.31354	0	0.0453085	-7.37918	-13.7589	0.11519	-6.37367	2.05749e-06	4.58806e-13	0.90282	0.0977457	0.00138148	2.75661e-09	1	1	gnl|BL_ORD_ID|234494 sp|Q8N6R0|MET13_HUMAN Methyltransferase-like protein 13 OS=Homo sapiens OX=9606 GN=METTL13 PE=1 SV=1//1.83353e-32
MS.gene048765	MS.gene048765	chr4.3:6491455-6492853	510	0	2.9084	0	1.0898	1.0898	2.9084	#N/A	#N/A	-10.6395	-9.42722	-1.16077	#N/A	2.62844e-06	8.38555e-05	0.338656	#N/A	0.00169984	0.0241429	1	#N/A	gnl|BL_ORD_ID|462988 sp|Q54KJ8|T2EB_DICDI General transcription factor IIE subunit 2 OS=Dictyostelium discoideum OX=44689 GN=gtf2e2 PE=3 SV=1//6.14384e-07
MS.gene63398	MS.gene63398	chr2.4:21570543-21576309	1479	0	0.392262	0	0.442935	0.442935	0.392262	#N/A	#N/A	-9.79127	-10.16	0.419878	#N/A	4.29825e-05	1.13084e-05	0.734944	#N/A	0.0166031	0.00534546	1	#N/A	-//-
MS.gene31266	MS.gene31266	chr2.4:7651851-7659253	630	0	0.587284	0	0.348793	0.348793	0.587284	#N/A	#N/A	-10.7131	-10.1879	-0.473275	#N/A	6.70088e-06	0.000135128	0.747676	#N/A	0.00373107	0.0334977	1	#N/A	gnl|BL_ORD_ID|219444 sp|Q8RUN2|LOG1_ARATH Cytokinin riboside 5&apos;-monophosphate phosphoribohydrolase LOG1 OS=Arabidopsis thaliana OX=3702 GN=LOG1 PE=1 SV=1//4.76271e-119
MS.gene058691	MS.gene058691	chr7.4:26546176-26548851	2040	0	1.51422	0	1.66754	1.66754	1.51422	#N/A	#N/A	-10.6617	-10.9586	0.346067	#N/A	2.95144e-06	1.01657e-06	0.768182	#N/A	0.00187162	0.000727571	1	#N/A	gnl|BL_ORD_ID|508863 sp|Q7X8C5|WAKLB_ARATH Wall-associated receptor kinase-like 2 OS=Arabidopsis thaliana OX=3702 GN=WAKL2 PE=2 SV=1//2.13051e-134
MS.gene071152	MS.gene071152	chr7.3:48889017-48890543	462	0	1.80141	0	3.42771	3.42771	1.80141	#N/A	#N/A	-10.0814	-11.1872	1.15884	#N/A	1.75168e-05	2.45597e-07	0.312373	#N/A	0.00834842	0.000210011	1	#N/A	gnl|BL_ORD_ID|121179 sp|Q9ZTN2|ERD2_PETHY ER lumen protein-retaining receptor OS=Petunia hybrida OX=4102 GN=ERD2 PE=2 SV=1//8.65508e-91
MS.gene059015	MS.gene059015	chr1.2:51974849-51976493	490	0	2.10224	0	3.46691	3.46691	2.10224	#N/A	#N/A	-10.4651	-11.3144	0.88886	#N/A	7.8962e-05	1.27884e-07	0.50978	#N/A	0.0266847	0.000115864	1	#N/A	gnl|BL_ORD_ID|468070 sp|Q9SVU4|TET20_ARATH Tetraspanin-20 OS=Arabidopsis thaliana OX=3702 GN=TOM2AH1 PE=1 SV=1//7.29106e-37
MS.gene034432	MS.gene034432	15250:1266-5317	1417	0	2.83506	0	1.77351	1.77351	2.83506	#N/A	#N/A	-12.1488	-11.6468	-0.451724	#N/A	1.76389e-09	2.83292e-08	0.652336	#N/A	2.89695e-06	3.23396e-05	1	#N/A	gnl|BL_ORD_ID|311637 sp|Q5HZV9|PP1R7_RAT Protein phosphatase 1 regulatory subunit 7 OS=Rattus norvegicus OX=10116 GN=Ppp1r7 PE=1 SV=1//7.59184e-13
MS.gene61455	MS.gene61455	chr8.3:13678867-13685372	2667	0	1.68706	0	1.3236	1.3236	1.68706	#N/A	#N/A	-12.0865	-11.9103	-0.129512	#N/A	2.78666e-09	9.0692e-09	0.897861	#N/A	4.41781e-06	1.17442e-05	1	#N/A	gnl|BL_ORD_ID|13242 sp|Q38998|AKT1_ARATH Potassium channel AKT1 OS=Arabidopsis thaliana OX=3702 GN=AKT1 PE=1 SV=2//0
MS.gene013195	MS.gene013195	chr3.2:81812809-81817911	2763	0	2.81399	0	2.20785	2.20785	2.81399	#N/A	#N/A	-12.4671	-12.2959	-0.120679	#N/A	2.20265e-10	7.54638e-10	0.900649	#N/A	4.37252e-07	1.31522e-06	1	#N/A	gnl|BL_ORD_ID|15433 sp|Q8W4I9|AML1_ARATH Protein MEI2-like 1 OS=Arabidopsis thaliana OX=3702 GN=ML1 PE=1 SV=1//0
MS.gene003551	MS.gene003551	chr4.1:30317639-30324085	1329	0	5.77549	0	1.98772	1.98772	5.77549	#N/A	#N/A	-13.8454	-12.4726	-1.31673	#N/A	1.93983e-14	0.000217928	0.465638	#N/A	1.38388e-10	0.0472515	1	#N/A	gnl|BL_ORD_ID|460648 sp|Q9SKR2|SYT1_ARATH Synaptotagmin-1 OS=Arabidopsis thaliana OX=3702 GN=SYT1 PE=1 SV=2//0
MS.gene41420	MS.gene41420	chr1.4:78466778-78470559	537	0	5.81998	0	4.04942	4.04942	5.81998	#N/A	#N/A	-13.0289	-12.729	-0.229923	#N/A	0.000121414	0.000163197	0.929242	#N/A	0.0361959	0.0382546	1	#N/A	gnl|BL_ORD_ID|59730 sp|Q8GXS3|CFIS2_ARATH Pre-mRNA cleavage factor Im 25 kDa subunit 2 OS=Arabidopsis thaliana OX=3702 GN=CFIS2 PE=1 SV=1//2.65797e-118
MS.gene04804	MS.gene04804	chr4.4:2462840-2467686	1477	0	7.52166	0	4.06061	4.06061	7.52166	#N/A	#N/A	-13.8065	-13.0908	-0.657617	#N/A	2.31551e-14	0.00011489	0.718596	#N/A	1.57904e-10	0.0298093	1	#N/A	gnl|BL_ORD_ID|16298 sp|Q8VYB5|AMSH1_ARATH AMSH-like ubiquitin thioesterase 1 OS=Arabidopsis thaliana OX=3702 GN=AMSH1 PE=2 SV=1//0
MS.gene001732	MS.gene001732	chr1.3:64260510-64263817	1392	0	14.7621	0	9.30843	9.30843	14.7621	#N/A	#N/A	-14.2556	-13.7364	-0.467548	#N/A	2.35173e-14	7.47075e-05	0.803269	#N/A	1.57904e-10	0.0222092	1	#N/A	gnl|BL_ORD_ID|143172 sp|F4HW02|GAT1_ARATH GABA transporter 1 OS=Arabidopsis thaliana OX=3702 GN=GAT1 PE=1 SV=1//1.91815e-166
MS.gene029379	MS.gene029379	chr1.4:84809505-84816794	1764	0	4.77862	0	4.45472	4.45472	4.77862	#N/A	#N/A	-13.6912	-13.8305	0.19523	#N/A	7.77968e-05	6.60947e-05	0.941299	#N/A	0.0265871	0.0204753	1	#N/A	gnl|BL_ORD_ID|753 sp|Q38950|2AAB_ARATH Serine/threonine-protein phosphatase 2A 65 kDa regulatory subunit A beta isoform OS=Arabidopsis thaliana OX=3702 GN=PP2AA2 PE=1 SV=2//0
MS.gene00939	MS.gene00939	chr2.3:66344340-66358391	1887	0	1.88795	0	2.7454	2.7454	1.88795	#N/A	#N/A	-13.2988	-14.0791	0.83616	#N/A	0.000100681	5.70582e-05	0.752615	#N/A	0.0314269	0.0186948	1	#N/A	gnl|BL_ORD_ID|129426 sp|Q9C5D2|FBL4_ARATH F-box/LRR-repeat protein 4 OS=Arabidopsis thaliana OX=3702 GN=FBL4 PE=2 SV=1//1.89007e-06
MS.gene006111	MS.gene006111	chr1.4:76238393-76241889	1041	0	4.59054	0	39.3645	39.3645	4.59054	#N/A	#N/A	-12.6816	-15.9055	3.26118	#N/A	0.000178818	1.42945e-19	0.0858808	#N/A	0.0483676	1.08787e-14	1	#N/A	gnl|BL_ORD_ID|65136 sp|Q8L518|CK2_ARATH Probable choline kinase 2 OS=Arabidopsis thaliana OX=3702 GN=At1g74320 PE=2 SV=1//1.21613e-165
MS.gene23110	MS.gene23110	chr7.2:4011656-4017742	2640	0	40.6095	0	50.1849	50.1849	40.6095	#N/A	#N/A	-16.6099	-17.0638	0.487992	#N/A	1.16574e-16	1.55946e-05	0.816066	#N/A	2.41933e-12	0.00702259	1	#N/A	gnl|BL_ORD_ID|340895 sp|Q948T9|RBOHB_SOLTU Respiratory burst oxidase homolog protein B OS=Solanum tuberosum OX=4113 GN=RBOHB PE=1 SV=1//0
MS.gene004535	-	16959:11551-18056	810	120.139	1.72887	3.30234	11.9432	11.9432	1.72887	3.30234	120.139	6.12086	-2.08651	3.10599	-5.13757	1.82139e-05	0.0778693	0.00302565	0.000770601	0.00860878	1	0.246523	0.101579	-//-
XLOC_079429	XLOC_079429	chr2.3:10639697-10643239	3543	4.0461	0.041429	0.341689	0.802849	0.802849	0.041429	0.341689	4.0461	6.43398	-1.42722	4.34723	-3.54283	1.93098e-06	0.350688	0.0178056	0.00139005	0.00131197	1	0.62063	0.149297	-
MS.gene78221	MS.gene78221	chr7.4:44451493-44454951	888	0.682099	0	0.028042	0.11288	0.11288	0	0.028042	0.682099	9.84304	-2.09326	7.46244	-4.45054	3.48459e-05	0.334872	0.0425842	0.00181218	0.0141547	1	0.905096	0.176649	gnl|BL_ORD_ID|429633 sp|Q8GXU5|SDI1_ARATH Protein SULFUR DEFICIENCY-INDUCED 1 OS=Arabidopsis thaliana OX=3702 GN=SDI1 PE=2 SV=1//3.55802e-113
MS.gene56522	MS.gene56522	chr4.4:30368539-30370260	1416	1.25426	0	0.0285785	0.071724	0.071724	0	0.0285785	1.25426	9.70642	-1.58702	5.93736	-5.29289	5.92091e-05	0.516957	0.0917836	0.00201827	0.0214893	1	1	0.189072	-//-
MS.gene066220	-	chr1.1:71166679-71176356	1533	0.843122	0	0.017724	0.03083	0.03083	0	0.017724	0.843122	10.919	-1.02719	6.88083	-4.99754	1.57676e-06	0.690068	0.0694771	0.0024729	0.00113194	1	1	0.214184	gnl|BL_ORD_ID|149078 sp|O81032|GGLO6_ARATH Probable L-gulonolactone oxidase 6 OS=Arabidopsis thaliana OX=3702 GN=GULLO6 PE=3 SV=1//0
MS.gene018963	MS.gene018963	chr3.3:29039380-29040056	465	1018.55	17.8106	110.896	116.763	116.763	17.8106	110.896	1018.55	5.75891	-0.343856	2.88432	-3.20753	6.35568e-06	0.770299	0.0301968	0.00262505	0.00356494	1	0.787925	0.222769	gnl|BL_ORD_ID|13531 sp|Q39837|ALB1_SOYBN Albumin-1 OS=Glycine max OX=3847 PE=1 SV=3//2.45965e-36
MS.gene23272	-	chr4.3:34985131-35117460	993	3.22674	0.331356	0.5545	0.102455	0.102455	0.331356	0.5545	3.22674	3.38097	2.18511	-1.30021	-2.5099	0.00015304	0.0229559	0.187433	0.0027957	0.0430615	0.683776	1	0.23244	gnl|BL_ORD_ID|294503 sp|B9HRL7|PCBER_POPTR Isoflavone reductase homolog PCBER OS=Populus trichocarpa OX=3694 GN=PCBER PE=1 SV=1//7.20196e-141
MS.gene001394	MS.gene001394	chr5.3:42964187-42968713	1164	1.08479	0	0.0375715	0.124172	0.124172	0	0.0375715	1.08479	10.8937	-1.97381	7.9762	-4.82229	9.74361e-07	0.43326	0.0255435	0.00300258	0.000741453	1	0.73095	0.24183	gnl|BL_ORD_ID|186112 sp|Q9FLN8|IAMT1_ARATH Indole-3-acetate O-methyltransferase 1 OS=Arabidopsis thaliana OX=3702 GN=IAMT1 PE=1 SV=1//0
MS.gene065353	-	chr7.1:70721112-70739550	618	1.35083	0	0.0054815	0.015052	0.015052	0	0.0054815	1.35083	13.0711	-1.70039	6.87826	-7.84148	9.17679e-05	0.407597	0.0203834	0.00307318	0.0295898	1	0.658931	0.246479	gnl|BL_ORD_ID|14104 sp|Q9Y673|ALG5_HUMAN Dolichyl-phosphate beta-glucosyltransferase OS=Homo sapiens OX=9606 GN=ALG5 PE=1 SV=1//1.04808e-29
MS.gene004790	MS.gene004790	chr1.4:61376691-61377530	840	11.266	0.0556745	0.845417	0.388855	0.388855	0.0556745	0.845417	11.266	7.52299	0.896832	2.98985	-3.67361	2.23013e-05	0.569795	0.150827	0.00496827	0.0100417	1	1	0.328285	gnl|BL_ORD_ID|212366 sp|Q40987|LECR_PEA Nodule lectin OS=Pisum sativum OX=3888 GN=NLEC1 PE=1 SV=1//1.26591e-88
MS.gene77212	MS.gene77212	chr7.2:37519471-37522304	888	0.945441	0	0.0937245	0.142526	0.142526	0	0.0937245	0.945441	10.0275	-0.732713	7.50073	-3.24289	1.99923e-05	0.74013	0.0399488	0.0169844	0.00918314	1	0.884959	0.649157	gnl|BL_ORD_ID|429633 sp|Q8GXU5|SDI1_ARATH Protein SULFUR DEFICIENCY-INDUCED 1 OS=Arabidopsis thaliana OX=3702 GN=SDI1 PE=2 SV=1//3.55802e-113
MS.gene025175	MS.gene025175	chr2.4:49677477-49680514	990	15.5385	0.248167	1.9098	0.218653	0.218653	0.248167	1.9098	15.5385	5.90056	2.9183	0.0400205	-2.97747	1.80648e-06	0.126019	0.991806	0.0180478	0.00126116	1	1	0.672725	gnl|BL_ORD_ID|62780 sp|P17541|CHIA_CUCSA Acidic endochitinase OS=Cucumis sativus OX=3659 PE=1 SV=1//1.18717e-82
MS.gene045239	MS.gene045239	chr3.2:73692036-73697449	1851	0.442331	0	0.028243	0	#N/A	#N/A	0.028243	0.442331	9.8644	5.95775	#N/A	-3.90078	3.31234e-05	0.159029	#N/A	0.0212238	0.0136987	1	#N/A	0.732249	gnl|BL_ORD_ID|105655 sp|Q14181|DPOA2_HUMAN DNA polymerase alpha subunit B OS=Homo sapiens OX=9606 GN=POLA2 PE=1 SV=2//3.4987e-67
MS.gene97677	-	chr1.1:39541127-39545548	327	1.09615	0	0.0920335	0.0958295	0.0958295	0	0.0920335	1.09615	10.0554	-0.319367	6.65055	-3.67276	2.03873e-05	0.91644	0.0881976	0.0293499	0.00931497	1	1	0.857429	gnl|BL_ORD_ID|7082 sp|Q9ZQP2|ACO12_ARATH Putative peroxisomal acyl-coenzyme A oxidase 1.2 OS=Arabidopsis thaliana OX=3702 GN=ACX1.2 PE=2 SV=1//1.93424e-11
MS.gene89362	MS.gene89362	50643:36272-40413	3318	0.481783	0	0.0410065	0.0764575	0.0764575	0	0.0410065	0.481783	9.59319	-1.16549	7.16775	-3.52269	9.28699e-05	0.64925	0.0537328	0.0409609	0.0299029	1	0.991081	0.993468	gnl|BL_ORD_ID|456383 sp|F4I116|SYLC_ARATH Leucine--tRNA ligase, cytoplasmic OS=Arabidopsis thaliana OX=3702 GN=At1g09620 PE=1 SV=1//0
MS.gene000594	MS.gene000594	chr3.4:29471622-29485138	2277	1.4811	0	0.737046	0.9439	0.9439	0	0.737046	1.4811	12.913	-0.635534	12.4702	-1.01618	2.30955e-11	0.798216	0.000266993	0.55578	6.63883e-08	1	0.0527328	1	gnl|BL_ORD_ID|41079 sp|Q9MB42|BAMS_GLYGL Beta-amyrin synthase OS=Glycyrrhiza glabra OX=49827 GN=GgbAS1 PE=1 SV=1//0
MS.gene016608	MS.gene016608	chr8.2:61231651-61232414	315	2.54385	0	3.21419	1.73958	1.73958	0	3.21419	2.54385	9.56098	0.647366	9.21406	0.340527	0.000103256	0.587405	0.000290002	0.768753	0.0318756	1	0.0562404	1	gnl|BL_ORD_ID|300538 sp|Q3SZE2|PFD1_BOVIN Prefoldin subunit 1 OS=Bos taurus OX=9913 GN=PFDN1 PE=2 SV=1//2.22675e-11
MS.gene056200	MS.gene056200	chr8.1:65563612-65565244	945	2.51461	0	3.82765	0.84297	0.84297	0	3.82765	2.51461	10.632	1.93098	9.27411	0.615786	3.32566e-06	0.0939149	0.000299206	0.542069	0.00207435	1	0.0575295	1	gnl|BL_ORD_ID|17549 sp|P51074|ANX4_FRAAN Annexin-like protein RJ4 OS=Fragaria ananassa OX=3747 PE=2 SV=2//1.05549e-165
MS.gene041940	MS.gene041940	chr8.4:25919832-25922329	717	1.36223	0	0.500495	0.511301	0.511301	0	0.500495	1.36223	10.3712	-0.308068	9.16792	-1.45926	7.39465e-06	0.867224	0.000313354	0.394476	0.00406775	1	0.0594369	1	gnl|BL_ORD_ID|50447 sp|O04899|CAMT5_TOBAC Caffeoyl-CoA O-methyltransferase 5 OS=Nicotiana tabacum OX=4097 GN=CCOAOMT5 PE=2 SV=1//4.21116e-122
MS.gene013772	MS.gene013772	chr3.3:74058565-74062068	1347	3.34227	0	2.91072	3.26624	3.26624	0	2.91072	3.34227	12.1407	-0.346931	12.3101	-0.160528	2.96553e-09	0.889615	0.000333467	0.926685	4.66895e-06	1	0.0623063	1	gnl|BL_ORD_ID|39540 sp|Q9SU08|AUXI1_ARATH Auxilin-related protein 1 OS=Arabidopsis thaliana OX=3702 GN=AUXI1 PE=1 SV=2//3.61679e-24
MS.gene75591	MS.gene75591	chr3.3:71421426-71425002	2301	0.606579	0	0.577138	0.401112	0.401112	0	0.577138	0.606579	9.71889	0.32879	9.32741	-0.0434293	5.04084e-05	0.863297	0.000368317	0.983997	0.018896	1	0.0672112	1	gnl|BL_ORD_ID|326309 sp|O48700|PUB6_ARATH U-box domain-containing protein 6 OS=Arabidopsis thaliana OX=3702 GN=PUB6 PE=2 SV=2//0
MS.gene026869	MS.gene026869	chr2.4:21454332-21458779	612	0.978422	0	3.23857	0.457085	0.457085	0	3.23857	0.978422	10.0505	2.31713	9.15812	1.47907	1.86905e-05	0.085291	0.000460978	0.218685	0.00874352	1	0.0779125	1	gnl|BL_ORD_ID|188147 sp|Q24208|IF2G_DROME Eukaryotic translation initiation factor 2 subunit 3 OS=Drosophila melanogaster OX=7227 GN=eIF2gamma PE=2 SV=1//3.50939e-101
MS.gene24082	MS.gene24082	6096:1602-4841	1008	0.606096	0	0.372138	0.358632	0.358632	0	0.372138	0.606096	9.57524	-0.211039	9.03121	-0.703072	7.71938e-05	0.883301	0.000484761	0.591459	0.0264602	1	0.0802442	1	gnl|BL_ORD_ID|53453 sp|Q9C9K1|CB7_ARATH Chlorophyll a-b binding protein 7, chloroplastic OS=Arabidopsis thaliana OX=3702 GN=LHCB7 PE=2 SV=1//3.01398e-162
MS.gene62975	MS.gene62975	chr1.3:16734623-16736746	1317	0.750877	0	0.666697	0.540307	0.540307	0	0.666697	0.750877	9.27894	0.0701147	9.0095	-0.158843	0.000163819	0.964584	0.000486196	0.89786	0.0451668	1	0.0803037	1	gnl|BL_ORD_ID|223321 sp|P93604|LRK10_WHEAT Rust resistance kinase Lr10 OS=Triticum aestivum OX=4565 GN=LRK10 PE=2 SV=1//2.15212e-134
MS.gene74628	MS.gene74628	chr6.3:22351148-22356571	2355	2.83262	0	2.52799	1.42352	1.42352	0	2.52799	2.83262	12.5375	0.591256	11.7447	-0.15709	1.37787e-10	0.733182	0.000575837	0.853488	2.91253e-07	1	0.0907145	1	gnl|BL_ORD_ID|311231 sp|Q9LD18|POT4_ARATH Potassium transporter 4 OS=Arabidopsis thaliana OX=3702 GN=POT4 PE=1 SV=2//0
MS.gene020080	MS.gene020080	chr8.2:79849217-79856289	1217	2.35939	0	2.46928	1.10962	1.10962	0	2.46928	2.35939	12.6529	0.945938	11.7665	0.0859716	9.31769e-11	0.589119	0.0005916	0.922046	2.11775e-07	1	0.0928077	1	gnl|BL_ORD_ID|237478 sp|P43294|MHK_ARATH Serine/threonine-protein kinase MHK OS=Arabidopsis thaliana OX=3702 GN=MHK PE=2 SV=2//0
MS.gene26858	MS.gene26858	chr4.4:24782018-24784363	1674	1.71925	0	0.924811	0.435547	0.435547	0	0.924811	1.71925	10.611	0.832905	8.84812	-0.889863	2.81434e-06	0.493644	0.000643022	0.411949	0.00179738	1	0.0981372	1	gnl|BL_ORD_ID|79615 sp|Q8VYR4|CSLG2_ARATH Cellulose synthase-like protein G2 OS=Arabidopsis thaliana OX=3702 GN=CSLG2 PE=2 SV=1//1.07927e-127
MS.gene018362	MS.gene018362	chr8.2:5503771-5504994	1032	7.87543	0	3.86839	5.9625	5.9625	0	3.86839	7.87543	11.8651	-0.803177	11.6605	-0.992601	9.24659e-09	0.744923	0.000668681	0.558668	1.24905e-05	1	0.100822	1	gnl|BL_ORD_ID|73290 sp|Q9FHH8|COL5_ARATH Zinc finger protein CONSTANS-LIKE 5 OS=Arabidopsis thaliana OX=3702 GN=COL5 PE=2 SV=2//4.08216e-86
MS.gene052237	MS.gene052237	chr3.2:74906113-74908912	2151	5.52786	0	3.69152	2.54869	2.54869	0	3.69152	5.52786	12.5471	0.353923	11.6284	-0.549301	1.23079e-10	0.886835	0.00069361	0.749027	2.65072e-07	1	0.103266	1	gnl|BL_ORD_ID|6535 sp|Q9UKV3|ACINU_HUMAN Apoptotic chromatin condensation inducer in the nucleus OS=Homo sapiens OX=9606 GN=ACIN1 PE=1 SV=2//1.44677e-19
MS.gene024151	MS.gene024151	chr7.1:22837334-22840698	609	27.8036	0.010232	18.9489	13.1189	13.1189	0.010232	18.9489	27.8036	11.1548	0.312513	10.3147	-0.545015	6.98175e-15	0.865911	0.000705736	0.476727	6.64107e-11	1	0.104312	1	gnl|BL_ORD_ID|337990 sp|P28188|RAD2A_ARATH Ras-related protein RABD2a OS=Arabidopsis thaliana OX=3702 GN=RABD2A PE=1 SV=3//2.16955e-138
MS.gene031210	MS.gene031210	21207:129509-133055	1089	4.77807	0	3.19087	1.97451	1.97451	0	3.19087	4.77807	12.6808	0.476118	11.6022	-0.574379	5.67963e-11	0.785204	0.000714798	0.503936	1.40935e-07	1	0.104917	1	gnl|BL_ORD_ID|552990 sp|O34973|YTAP_BACSU Putative hydrolase YtaP OS=Bacillus subtilis (strain 168) OX=224308 GN=ytaP PE=3 SV=1//1.65368e-08
MS.gene54085	MS.gene54085	chr1.2:10100866-10109802	3249	1.43284	0	0.327103	0.680077	0.680077	0	0.327103	1.43284	12.27	-1.33183	11.3996	-2.14009	1.34548e-09	0.58568	0.000843283	0.201231	2.29223e-06	1	0.116312	1	gnl|BL_ORD_ID|493463 sp|Q9SCJ9|UBP26_ARATH Ubiquitin carboxyl-terminal hydrolase 26 OS=Arabidopsis thaliana OX=3702 GN=UBP26 PE=1 SV=3//0
MS.gene000601	MS.gene000601	chr3.4:29789387-29792235	1536	6.36078	0	5.99098	2.01294	2.01294	0	5.99098	6.36078	12.7734	1.29401	11.3165	-0.102237	2.32646e-11	0.603273	0.000920971	0.953589	6.63883e-08	1	0.122448	1	gnl|BL_ORD_ID|48756 sp|A6YIH8|C7D55_HYOMU Premnaspirodiene oxygenase OS=Hyoscyamus muticus OX=35626 GN=CYP71D55 PE=1 SV=1//1.4258e-164
MS.gene069488	-	chr6.4:53327320-53347512	603	0.323035	0	1.23706	0.108127	0.108127	0	1.23706	0.323035	10.5576	3.11244	9.30353	1.8711	2.31122e-05	0.140634	0.000931344	0.331963	0.0103052	1	0.123462	1	gnl|BL_ORD_ID|240162 sp|P13087|MIRA_SYNDU Miraculin OS=Synsepalum dulcificum OX=3743 PE=1 SV=3//9.4201e-31
MS.gene89947	MS.gene89947	chr3.4:36166477-36168105	768	0.956031	0	0.464209	0.564409	0.564409	0	0.464209	0.956031	9.24444	-0.54955	8.68717	-1.05155	0.000180672	0.773712	0.000964875	0.553416	0.0486958	1	0.12627	1	gnl|BL_ORD_ID|128893 sp|Q6NLB1|FB118_ARATH F-box protein At2g26850 OS=Arabidopsis thaliana OX=3702 GN=At2g26850 PE=2 SV=1//2.14392e-78
MS.gene72563	-	chr4.1:61977322-61981738	288	0.977281	0	2.08437	0.333279	0.333279	0	2.08437	0.977281	10.0691	2.64462	8.57333	1.1851	2.4539e-05	0.0231701	0.00111743	0.259729	0.0107938	0.687823	0.138044	1	-//-
MS.gene03792	MS.gene03792	chr4.3:45983761-45988515	1437	0.615362	0	0.593913	0.177748	0.177748	0	0.593913	0.615362	10.1513	1.50377	8.56861	-0.0424047	1.37997e-05	0.218053	0.00112946	0.972897	0.00687842	1	0.139008	1	gnl|BL_ORD_ID|194842 sp|Q9ZUX7|IPT2_ARATH tRNA dimethylallyltransferase 2 OS=Arabidopsis thaliana OX=3702 GN=IPT2 PE=1 SV=2//2.90587e-162
MS.gene053006	MS.gene053006	chr6.2:1640142-1644400	528	12.9171	0.564305	24.05	13.2603	13.2603	0.564305	24.05	12.9171	4.47679	0.623353	4.77098	0.904803	5.13889e-06	0.60502	0.00112956	0.238833	0.00301582	1	0.139008	1	gnl|BL_ORD_ID|499707 sp|Q8LGG8|USPAL_ARATH Universal stress protein A-like protein OS=Arabidopsis thaliana OX=3702 GN=At3g01520 PE=1 SV=2//7.54575e-94
MS.gene42635	MS.gene42635	chr3.4:91992956-91995548	684	4.62055	0	7.40193	1.81314	1.81314	0	7.40193	4.62055	12.1794	1.81089	11.0284	0.6888	1.47992e-09	0.291693	0.00130631	0.416367	2.50258e-06	1	0.151166	1	-//-
MS.gene031215	MS.gene031215	chr3.4:95027738-95032539	3540	1.65122	0	1.80385	0.888939	0.888939	0	1.80385	1.65122	11.5765	0.77444	10.8902	0.13796	9.72039e-08	0.656718	0.00144352	0.886254	9.99575e-05	1	0.160759	1	gnl|BL_ORD_ID|117637 sp|Q9LYD9|EMF1_ARATH Protein EMBRYONIC FLOWER 1 OS=Arabidopsis thaliana OX=3702 GN=EMF1 PE=1 SV=1//9.82913e-34
MS.gene38667	MS.gene38667	chr5.1:20906769-20910243	974	4.84779	0	1.56538	1.26139	1.26139	0	1.56538	4.84779	12.6724	0.0493201	10.9266	-1.65086	6.20202e-11	0.984542	0.00146161	0.325543	1.49037e-07	1	0.162372	1	gnl|BL_ORD_ID|186047 sp|Q38826|IAA8_ARATH Auxin-responsive protein IAA8 OS=Arabidopsis thaliana OX=3702 GN=IAA8 PE=1 SV=1//4.83861e-113
MS.gene012667	MS.gene012667	chr8.1:1614989-1618689	2272	3.82817	0	3.39548	1.09738	1.09738	0	3.39548	3.82817	12.4227	1.39823	10.8196	-0.163449	3.39406e-10	0.415046	0.00156716	0.850387	6.67955e-07	1	0.168845	1	gnl|BL_ORD_ID|199701 sp|Q9SSE9|JMJ25_ARATH Lysine-specific demethylase JMJ25 OS=Arabidopsis thaliana OX=3702 GN=JMJ25 PE=1 SV=1//2.08624e-37
MS.gene024799	MS.gene024799	chr5.3:2161611-2164361	921	0.664639	0	0.24606	0.270817	0.270817	0	0.24606	0.664639	9.4849	-0.399339	8.38521	-1.44621	0.000100769	0.83724	0.00161023	0.40521	0.0314269	1	0.171053	1	gnl|BL_ORD_ID|259168 sp|Q9SBF3|MYB92_ARATH Transcription factor MYB92 OS=Arabidopsis thaliana OX=3702 GN=MYB92 PE=1 SV=1//3.32666e-79
MS.gene001392	MS.gene001392	chr5.2:11213916-11216591	1131	3.6304	0	3.11122	1.47762	1.47762	0	3.11122	3.6304	11.8782	0.84092	10.7811	-0.214058	8.54895e-09	0.629025	0.001629	0.812765	1.16169e-05	1	0.17235	1	gnl|BL_ORD_ID|289277 sp|Q9SUK9|P2C55_ARATH Probable protein phosphatase 2C 55 OS=Arabidopsis thaliana OX=3702 GN=At4g16580 PE=2 SV=2//4.57974e-111
MS.gene066137	MS.gene066137	chr3.1:26628982-26631831	1536	4.59413	0	4.13948	1.38343	1.38343	0	4.13948	4.59413	12.3072	1.30033	10.7776	-0.169198	6.61018e-10	0.597559	0.00163551	0.922165	1.21696e-06	1	0.17237	1	gnl|BL_ORD_ID|48756 sp|A6YIH8|C7D55_HYOMU Premnaspirodiene oxygenase OS=Hyoscyamus muticus OX=35626 GN=CYP71D55 PE=1 SV=1//1.53827e-164
MS.gene84911	-	chr6.4:33170108-33176623	1068	0.499246	0	0.420123	0.225338	0.225338	0	0.420123	0.499246	9.65918	0.727722	8.70287	-0.193687	0.000119703	0.593007	0.00163589	0.877319	0.0357682	1	0.17237	1	gnl|BL_ORD_ID|396836 sp|Q8L840|RQL4A_ARATH ATP-dependent DNA helicase Q-like 4A OS=Arabidopsis thaliana OX=3702 GN=RECQL4A PE=2 SV=1//2.28146e-22
MS.gene024716	MS.gene024716	chr5.4:3573375-3578542	1446	1.71056	0	2.36867	0.771349	0.771349	0	2.36867	1.71056	11.7378	1.39304	10.7902	0.478228	2.60597e-08	0.41838	0.00169499	0.590247	3.13113e-05	1	0.176343	1	gnl|BL_ORD_ID|97582 sp|Q9ZNU6|DET1_SOLLC Light-mediated development protein DET1 OS=Solanum lycopersicum OX=4081 GN=DET1 PE=1 SV=1//0
MS.gene22993	MS.gene22993	chr7.2:6521519-6523185	963	5.88658	0	5.06723	2.08004	2.08004	0	5.06723	5.88658	11.8909	1.06413	10.5871	-0.209483	7.86157e-09	0.54053	0.00210066	0.814301	1.09433e-05	1	0.20038	1	gnl|BL_ORD_ID|129942 sp|Q9LMU0|FCL2_ARATH Putative GDP-L-fucose synthase 2 OS=Arabidopsis thaliana OX=3702 GN=GER2 PE=1 SV=1//0
MS.gene27244	-	chr1.1:1804761-1818195	723	7.48072	0	4.11438	1.73768	1.73768	0	4.11438	7.48072	12.4174	0.997586	10.514	-0.865467	3.56196e-10	0.575514	0.00226271	0.364323	6.95005e-07	1	0.208624	1	gnl|BL_ORD_ID|145586 sp|Q9FWR5|GCA1_ARATH Gamma carbonic anhydrase 1, mitochondrial OS=Arabidopsis thaliana OX=3702 GN=GAMMACA1 PE=1 SV=1//2.14225e-115
XLOC_321450	XLOC_321450	chr8.3:63820983-64031224	806	11.1827	5.5482	7.38228	5.57697	5.57697	5.5482	7.38228	11.1827	5.56851	0.920939	4.01636	-0.64892	1.31822e-08	0.441758	0.00232058	0.443641	1.73951e-05	1	0.211522	1	-
MS.gene75261	MS.gene75261	chr2.1:43737928-43739114	606	1.42511	0	3.63447	0.585148	0.585148	0	3.63447	1.42511	9.36618	2.38345	8.3121	1.36148	0.00013925	0.0830973	0.00275838	0.255815	0.0400218	1	0.233619	1	gnl|BL_ORD_ID|80168 sp|C6TG62|CSPL9_SOYBN CASP-like protein 1B1 OS=Glycine max OX=3847 PE=2 SV=1//2.12532e-90
XLOC_012625	XLOC_012625	43130:11553-15767	1961	0.622609	0	0.228849	0.143302	0.143302	0	0.228849	0.622609	9.99441	0.411986	8.0947	-1.44319	3.22003e-05	0.776793	0.00280632	0.25412	0.0134142	1	0.235388	1	-
MS.gene56451	MS.gene56451	chr4.4:29415301-29420049	707	1.02138	0	0.503319	0.5524	0.5524	0	0.503319	1.02138	10.8761	-0.396411	10.19	-1.03568	1.02214e-06	0.872229	0.00315552	0.546377	0.000772166	1	0.253633	1	gnl|BL_ORD_ID|106288 sp|P42698|DR111_ARATH DNA-damage-repair/toleration protein DRT111, chloroplastic OS=Arabidopsis thaliana OX=3702 GN=DRT111 PE=1 SV=2//1.95195e-91
MS.gene01419	MS.gene01419	chr2.2:69132190-69132714	525	16.3682	0.27979	4.40888	5.42258	5.42258	0.27979	4.40888	16.3682	5.77694	-0.533014	4.43991	-1.88021	1.72021e-05	0.647489	0.00342416	0.0628741	0.00825013	1	0.265346	1	gnl|BL_ORD_ID|443456 sp|Q41112|SRP_PHAVU Stress-related protein OS=Phaseolus vulgaris OX=3885 GN=SRP PE=2 SV=1//5.38602e-96
MS.gene035836	MS.gene035836	chr3.4:50068516-50072065	645	1.2062	0	1.52361	0.669287	0.669287	0	1.52361	1.2062	10.6981	0.949342	10.0495	0.343491	2.44186e-06	0.586729	0.00347392	0.736059	0.00160648	1	0.266802	1	gnl|BL_ORD_ID|306826 sp|O94903|PLPHP_HUMAN Pyridoxal phosphate homeostasis protein OS=Homo sapiens OX=9606 GN=PLPBP PE=1 SV=1//1.10336e-55
MS.gene063565	MS.gene063565	chr1.3:25657004-25661994	1242	0.430667	0	0.058139	0.109674	0.109674	0	0.058139	0.430667	9.70954	-1.10117	7.93998	-2.84782	5.129e-05	0.561205	0.00408729	0.100007	0.0191636	1	0.291415	1	gnl|BL_ORD_ID|464672 sp|P0A9T5|TAS_SHIFL Protein tas OS=Shigella flexneri OX=623 GN=tas PE=3 SV=1//1.45774e-96
MS.gene20150	MS.gene20150	chr4.4:3765713-3769641	666	1.10731	0	1.36663	0.53722	0.53722	0	1.36663	1.10731	10.7213	1.10068	9.88129	0.306585	1.8816e-06	0.528087	0.00409382	0.759095	0.00128714	1	0.29144	1	gnl|BL_ORD_ID|506910 sp|O82197|VP321_ARATH Vacuolar protein sorting-associated protein 32 homolog 1 OS=Arabidopsis thaliana OX=3702 GN=VPS32.1 PE=1 SV=1//6.38036e-84
MS.gene23514	MS.gene23514	chr7.3:14814589-14816914	1491	4.61845	0.000832	3.54116	1.59553	1.59553	0.000832	3.54116	4.61845	9.78149	0.93004	8.49016	-0.380059	2.94124e-08	0.593516	0.00409171	0.676157	3.4611e-05	1	0.29144	1	gnl|BL_ORD_ID|48843 sp|O81117|C94A1_VICSA Cytochrome P450 94A1 OS=Vicia sativa OX=3908 GN=CYP94A1 PE=2 SV=2//0
MS.gene42666	MS.gene42666	chr3.1:83762402-83767345	687	1.63543	0	1.26493	0.703889	0.703889	0	1.26493	1.63543	11.1002	0.448943	9.84761	-0.756574	4.18641e-07	0.854561	0.00443677	0.659163	0.000366173	1	0.305041	1	gnl|BL_ORD_ID|48026 sp|Q5ZHS3|C1D_CHICK Nuclear nucleic acid-binding protein C1D OS=Gallus gallus OX=9031 GN=C1D PE=2 SV=1//3.95068e-07
MS.gene68803	MS.gene68803	chr3.2:92376572-92380098	1557	1.38133	0	0.69797	0.585178	0.585178	0	0.69797	1.38133	10.8737	0.0738039	9.84016	-0.941992	2.08676e-06	0.977439	0.00446916	0.590576	0.00139702	1	0.306612	1	gnl|BL_ORD_ID|151090 sp|Q00081|GLGL1_SOLTU Glucose-1-phosphate adenylyltransferase large subunit 1 (Fragment) OS=Solanum tuberosum OX=4113 GN=AGPS1 PE=1 SV=1//0
MS.gene08408	MS.gene08408	chr4.1:17709575-17712297	1491	1.1058	0	2.10731	0.2189	0.2189	0	2.10731	1.1058	10.1803	2.98284	8.0883	0.934122	8.77795e-05	0.0304774	0.00487732	0.459606	0.0287505	0.78272	0.322517	1	gnl|BL_ORD_ID|48776 sp|P93147|C81E1_GLYEC Isoflavone 2&apos;-hydroxylase OS=Glycyrrhiza echinata OX=46348 GN=CYP81E1 PE=1 SV=2//0
MS.gene036079	MS.gene036079	chr1.1:52007076-52010153	1350	0.7994	0	0.987816	0.583304	0.583304	0	0.987816	0.7994	9.9046	0.533005	9.64482	0.313413	3.41194e-05	0.764205	0.00520671	0.778641	0.013984	1	0.333324	1	gnl|BL_ORD_ID|437372 sp|Q6Q1P4|SMC1_ARATH Structural maintenance of chromosomes protein 1 OS=Arabidopsis thaliana OX=3702 GN=SMC1 PE=2 SV=2//9.69848e-90
MS.gene40342	MS.gene40342	chr3.3:89846683-89853228	1292	0.74692	0	0.526606	0.279438	0.279438	0	0.526606	0.74692	10.8841	0.652448	9.66571	-0.518285	1.09105e-06	0.788685	0.00531022	0.765868	0.0008186	1	0.336314	1	gnl|BL_ORD_ID|28830 sp|Q9LYE3|ASI1_ARATH Protein ANTI-SILENCING 1 OS=Arabidopsis thaliana OX=3702 GN=ASI1 PE=4 SV=2//3.15051e-34
MS.gene052996	MS.gene052996	chr2.1:49262827-49266184	656	1.83333	0	1.34088	0.503455	0.503455	0	1.34088	1.83333	11.2215	1.23348	9.55176	-0.422322	3.13305e-07	0.613922	0.00592038	0.808613	0.000284956	1	0.354403	1	gnl|BL_ORD_ID|13895 sp|Q5XEM9|ALFL5_ARATH PHD finger protein ALFIN-LIKE 5 OS=Arabidopsis thaliana OX=3702 GN=AL5 PE=2 SV=1//3.72304e-81
MS.gene051201	MS.gene051201	chr2.3:48990932-48993940	990	13.9139	0	4.61157	0.14698	0.14698	0	4.61157	13.9139	13.9656	4.77462	7.62741	-1.53828	1.69567e-08	0.0260583	0.00629528	0.44065	2.13869e-05	0.725713	0.365467	1	gnl|BL_ORD_ID|62780 sp|P17541|CHIA_CUCSA Acidic endochitinase OS=Cucumis sativus OX=3659 PE=1 SV=1//1.18717e-82
MS.gene034451	MS.gene034451	chr2.3:12466083-12470156	1328	0.88122	0	0.152234	0.392788	0.392788	0	0.152234	0.88122	10.4436	-1.61618	9.47687	-2.53466	5.07703e-06	0.506929	0.00638953	0.135339	0.00298719	1	0.367619	1	gnl|BL_ORD_ID|259816 sp|F4HVS6|MYOB6_ARATH Probable myosin-binding protein 6 OS=Arabidopsis thaliana OX=3702 GN=MYOB6 PE=2 SV=1//7.83316e-35
MS.gene57996	MS.gene57996	chr8.3:10344266-10347051	1587	1.02067	0	1.10318	0.544876	0.544876	0	1.10318	1.02067	10.0958	0.81467	9.40846	0.160551	6.23438e-05	0.736384	0.00659481	0.932175	0.0222729	1	0.374243	1	gnl|BL_ORD_ID|179760 sp|Q9FZP1|HPSE3_ARATH Heparanase-like protein 3 OS=Arabidopsis thaliana OX=3702 GN=At5g34940 PE=2 SV=2//0
MS.gene036158	MS.gene036158	chr1.3:50861252-50862264	612	2.80364	0	3.35739	1.52854	1.52854	0	3.35739	2.80364	10.1027	0.908556	9.42802	0.26676	1.58839e-05	0.609085	0.00671057	0.806299	0.00773159	1	0.378538	1	gnl|BL_ORD_ID|39690 sp|O24542|AX22D_VIGRR Auxin-induced protein 22D OS=Vigna radiata var. radiata OX=3916 GN=AUX22D PE=2 SV=1//8.83329e-98
MS.gene003851	-	chr4.2:38315671-38319554	654	1.12502	0	0.485839	0.543296	0.543296	0	0.485839	1.12502	10.3998	-0.245098	9.38067	-1.2029	6.15365e-06	0.921466	0.00675836	0.483722	0.00348589	1	0.380471	1	-//-
MS.gene68182	MS.gene68182	chr3.1:92405315-92407632	819	4.82123	0.047796	7.14322	2.84347	2.84347	0.047796	7.14322	4.82123	6.55473	1.10866	6.057	0.575338	4.03815e-05	0.429767	0.00704764	0.499477	0.0158942	1	0.390117	1	gnl|BL_ORD_ID|171593 sp|Q04832|HEXP_LEIMA DNA-binding protein HEXBP OS=Leishmania major OX=5664 GN=HEXBP PE=4 SV=1//9.62927e-07
MS.gene07115	MS.gene07115	51683:23073-24029	450	5.41299	0	4.69869	1.24784	1.24784	0	4.69869	5.41299	10.9685	1.66824	9.05707	-0.196654	7.24492e-07	0.338591	0.00932145	0.845329	0.000590691	1	0.450505	1	gnl|BL_ORD_ID|136001 sp|Q9LHH7|FOLD2_ARATH Bifunctional protein FolD 2 OS=Arabidopsis thaliana OX=3702 GN=FOLD2 PE=2 SV=1//2.28068e-78
MS.gene047792	MS.gene047792	chr5.1:11904421-11906346	927	1.30973	0	0.274587	0.59665	0.59665	0	0.274587	1.30973	9.93347	-1.29071	9.00356	-2.20749	2.61677e-05	0.599362	0.0102608	0.198943	0.0112926	1	0.473966	1	gnl|BL_ORD_ID|30996 sp|Q6NVR9|ATAD3_XENTR ATPase family AAA domain-containing protein 3 OS=Xenopus tropicalis OX=8364 GN=atad3 PE=2 SV=1//4.35472e-73
MS.gene026487	MS.gene026487	chr1.1:17992756-17998399	1368	0.920918	0	0.408938	0.193206	0.193206	0	0.408938	0.920918	10.9811	0.904114	8.92122	-1.14174	7.9038e-07	0.712671	0.0110813	0.507199	0.000633105	1	0.490377	1	gnl|BL_ORD_ID|41075 sp|B5BSX1|BAMO_GLYUR Beta-amyrin 11-oxidase OS=Glycyrrhiza uralensis OX=74613 GN=CYP88D6 PE=1 SV=1//0
MS.gene34959	MS.gene34959	chr4.4:17789454-17791824	804	0.92234	0	0.505962	0.139335	0.139335	0	0.505962	0.92234	9.73377	1.60668	7.24008	-0.852124	6.24689e-05	0.234448	0.0116303	0.474398	0.0222828	1	0.500597	1	gnl|BL_ORD_ID|312138 sp|Q8H129|PPA3_ARATH Purple acid phosphatase 3 OS=Arabidopsis thaliana OX=3702 GN=PAP3 PE=2 SV=1//7.04095e-129
MS.gene056084	MS.gene056084	chr1.4:67623160-67628891	1878	0.475197	0	0.300945	0.156496	0.156496	0	0.300945	0.475197	10.0499	0.681667	8.64162	-0.67948	1.87622e-05	0.778844	0.0143241	0.698475	0.00874861	1	0.559206	1	gnl|BL_ORD_ID|306543 sp|Q9LRZ5|PLDZ1_ARATH Phospholipase D zeta 1 OS=Arabidopsis thaliana OX=3702 GN=PLDZETA1 PE=1 SV=1//0
MS.gene072943	MS.gene072943	chr3.1:85439381-85441600	651	1.33263	0	0.600601	0.37903	0.37903	0	0.600601	1.33263	10.1698	0.378932	8.55886	-1.1724	1.42585e-05	0.879508	0.0149402	0.500216	0.00707621	1	0.569266	1	gnl|BL_ORD_ID|378989 sp|B6IRQ7|RL4_RHOCS 50S ribosomal protein L4 OS=Rhodospirillum centenum (strain ATCC 51521 / SW) OX=414684 GN=rplD PE=3 SV=1//7.49584e-43
MS.gene81597	MS.gene81597	chr5.1:67835610-67840099	3444	0.369732	0	0.352499	0.193565	0.193565	0	0.352499	0.369732	9.33733	0.65963	8.60692	-0.0498923	0.000166604	0.723696	0.0149533	0.976064	0.045824	1	0.569481	1	gnl|BL_ORD_ID|117099 sp|Q6JN46|EIX2_SOLLC Receptor-like protein EIX2 OS=Solanum lycopersicum OX=4081 GN=EIX2 PE=1 SV=2//4.26041e-07
MS.gene39805	MS.gene39805	chr5.4:69209511-69212482	1032	1.01992	0	1.61222	0.278651	0.278651	0	1.61222	1.01992	10.2063	2.29221	8.54223	0.667019	1.76242e-05	0.18945	0.0151864	0.543151	0.00836466	1	0.573721	1	gnl|BL_ORD_ID|6396 sp|Q9LTH8|ACH11_ARATH 1-aminocyclopropane-1-carboxylate oxidase homolog 11 OS=Arabidopsis thaliana OX=3702 GN=At5g59530 PE=2 SV=1//8.75017e-122
MS.gene26849	MS.gene26849	chr4.4:24629109-24630527	1419	1.20111	0	1.1411	0.58699	0.58699	0	1.1411	1.20111	9.37163	0.747446	8.53492	-0.0589696	0.000135503	0.67736	0.0157651	0.962503	0.0393062	1	0.584247	1	gnl|BL_ORD_ID|181079 sp|Q9SGP2|HSL1_ARATH Receptor-like protein kinase HSL1 OS=Arabidopsis thaliana OX=3702 GN=HSL1 PE=2 SV=1//1.27855e-22
MS.gene73915	MS.gene73915	chr3.3:69285219-69285835	417	4.3978	0	1.71519	1.33698	1.33698	0	1.71519	4.3978	10.0368	0.175963	8.51634	-1.32015	1.96367e-05	0.928434	0.0159372	0.26264	0.00905648	1	0.585731	1	-//-
MS.gene036103	MS.gene036103	chr1.3:49967234-49978323	777	0.17564	0	0.283815	0.070381	0.070381	0	0.283815	0.17564	9.56863	1.79933	8.43955	0.698323	0.000108689	0.309587	0.0172214	0.544623	0.0331275	1	0.609385	1	gnl|BL_ORD_ID|185376 sp|P24397|HY6H_HYONI Hyoscyamine 6-dioxygenase OS=Hyoscyamus niger OX=4079 GN=H6H PE=1 SV=1//1.96667e-59
MS.gene93192	MS.gene93192	chr1.3:15914084-15923765	1809	0.272498	0	0.225332	0.0795105	0.0795105	0	0.225332	0.272498	9.99621	1.23904	8.4197	-0.288214	3.18358e-05	0.610713	0.0175196	0.871651	0.0132866	1	0.614566	1	gnl|BL_ORD_ID|50600 sp|Q9MBA1|CAO_ARATH Chlorophyllide a oxygenase, chloroplastic OS=Arabidopsis thaliana OX=3702 GN=CAO PE=1 SV=1//0
MS.gene049073	MS.gene049073	chr4.1:3162846-3171154	1218	0.203853	0	0.161964	0.082755	0.082755	0	0.161964	0.203853	9.36188	0.768945	8.26671	-0.29663	0.000138102	0.753724	0.0194599	0.871536	0.0398071	1	0.648258	1	gnl|BL_ORD_ID|289179 sp|Q0JLP9|P2C06_ORYSJ Probable protein phosphatase 2C 6 OS=Oryza sativa subsp. japonica OX=39947 GN=Os01g0583100 PE=1 SV=1//2.42756e-91
MS.gene014391	MS.gene014391	chr3.2:90645878-90651381	1275	0.314063	0	0.376935	0.127598	0.127598	0	0.376935	0.314063	9.3996	1.33956	8.29447	0.263246	0.00012229	0.451968	0.0196213	0.818167	0.0363627	1	0.6501	1	gnl|BL_ORD_ID|275212 sp|Q0JIL1|NRX2_ORYSJ Probable nucleoredoxin 2 OS=Oryza sativa subsp. japonica OX=39947 GN=Os01g0794400 PE=2 SV=1//2.53922e-124
MS.gene49756	MS.gene49756	chr4.4:7385366-7389871	1962	2.50352	0	6.2732	0.15371	0.15371	0	6.2732	2.50352	12.0799	5.08179	8.2725	1.32302	9.92226e-08	0.011675	0.020167	0.33264	0.000101576	0.489382	0.656864	1	gnl|BL_ORD_ID|143363 sp|Q3AD36|GATA_CARHZ Glutamyl-tRNA(Gln) amidotransferase subunit A OS=Carboxydothermus hydrogenoformans (strain ATCC BAA-161 / DSM 6008 / Z-2901) OX=246194 GN=gatA PE=3 SV=1//5.0952e-43
MS.gene027419	MS.gene027419	chr4.4:53426715-53430215	504	0.546783	0	0.271186	0.181562	0.181562	0	0.271186	0.546783	9.54444	0.37109	8.16178	-0.983421	8.21475e-05	0.881634	0.0214368	0.576247	0.0272975	1	0.6757	1	gnl|BL_ORD_ID|434292 sp|Q3MHW7|SGMR2_BOVIN Sigma intracellular receptor 2 OS=Bos taurus OX=9913 GN=TMEM97 PE=2 SV=1//3.41728e-10
MS.gene070937	MS.gene070937	chr1.4:79824747-79827672	1599	0.812891	0	0.222312	0.21065	0.21065	0	0.222312	0.812891	9.86501	-0.114246	8.11758	-1.83756	9.83737e-05	0.971024	0.0222517	0.311211	0.030976	1	0.685233	1	gnl|BL_ORD_ID|417999 sp|Q6AVI0|RSLE2_ORYSJ Zinc finger BED domain-containing protein RICESLEEPER 2 OS=Oryza sativa subsp. japonica OX=39947 GN=Os03g0733400 PE=2 SV=1//1.46745e-74
MS.gene01536	MS.gene01536	chr2.2:67792965-67799490	2187	0.240813	0	0.337199	0.098237	0.098237	0	0.337199	0.240813	9.26609	1.56026	8.15734	0.482382	0.00017343	0.378299	0.0222708	0.678473	0.0472461	1	0.685233	1	gnl|BL_ORD_ID|148188 sp|Q9C857|GDL16_ARATH GDSL esterase/lipase At1g31550 OS=Arabidopsis thaliana OX=3702 GN=At1g31550 PE=2 SV=1//2.22287e-96
MS.gene57997	MS.gene57997	chr8.1:11080220-11082091	1114	1.56191	0	1.93907	0.321877	0.321877	0	1.93907	1.56191	10.153	2.35761	8.08355	0.317147	1.37164e-05	0.17728	0.0239732	0.766556	0.00685838	1	0.710037	1	gnl|BL_ORD_ID|179760 sp|Q9FZP1|HPSE3_ARATH Heparanase-like protein 3 OS=Arabidopsis thaliana OX=3702 GN=At5g34940 PE=2 SV=2//7.31191e-169
MS.gene90521	MS.gene90521	chr8.3:24071526-24073748	651	2.21151	0	2.17161	0.263014	0.263014	0	2.17161	2.21151	10.8979	2.82331	8.04862	0.00247217	9.82146e-07	0.254287	0.024	1	0.000744894	1	0.710381	1	gnl|BL_ORD_ID|428040 sp|Q9AT54|SCGT_TOBAC Scopoletin glucosyltransferase OS=Nicotiana tabacum OX=4097 GN=TOGT1 PE=1 SV=1//8.96259e-23
MS.gene39107	MS.gene39107	chr7.4:18235094-18236321	363	1.90936	0	2.00563	0.224088	0.224088	0	2.00563	1.90936	9.84308	2.88382	6.99108	0.0625654	5.34027e-05	0.0454951	0.0253376	0.965144	0.0198879	0.922694	0.729079	1	gnl|BL_ORD_ID|143137 sp|P27057|GAST1_SOLLC Protein GAST1 OS=Solanum lycopersicum OX=4081 GN=GAST1 PE=2 SV=1//1.0938e-33
MS.gene073270	MS.gene073270	chr4.3:55664973-55670042	801	0.35403	0	0.44853	0.10894	0.10894	0	0.44853	0.35403	9.45705	1.76804	7.95151	0.309214	0.000103325	0.470457	0.0271306	0.86633	0.0318756	1	0.749949	1	gnl|BL_ORD_ID|124329 sp|Q9M0I2|EXPB3_ARATH Expansin-B3 OS=Arabidopsis thaliana OX=3702 GN=EXPB3 PE=2 SV=2//5.17314e-136
MS.gene35207	MS.gene35207	chr4.4:18712445-18715169	1491	1.36425	0	1.84945	0.191218	0.191218	0	1.84945	1.36425	10.4917	3.01948	7.86606	0.434495	6.26632e-06	0.0890237	0.0289844	0.697205	0.00352348	1	0.772792	1	gnl|BL_ORD_ID|48776 sp|P93147|C81E1_GLYEC Isoflavone 2&apos;-hydroxylase OS=Glycyrrhiza echinata OX=46348 GN=CYP81E1 PE=1 SV=2//0
MS.gene36273	MS.gene36273	15221:2359-5340	1455	0.748198	0	0.700744	0.163214	0.163214	0	0.700744	0.748198	9.76776	1.82183	7.79159	-0.103107	6.32557e-05	0.310642	0.0299383	0.934553	0.0225282	1	0.786161	1	gnl|BL_ORD_ID|54759 sp|Q9C968|CCA24_ARATH Cyclin-A2-4 OS=Arabidopsis thaliana OX=3702 GN=CYCA2-4 PE=2 SV=1//3.71988e-139
MS.gene016671	MS.gene016671	chr8.3:59100070-59102759	885	1.38795	0	1.24	0.188337	0.188337	0	1.24	1.38795	10.5026	2.4344	7.83642	-0.18631	4.70493e-06	0.322203	0.0302703	0.915463	0.00281912	1	0.788852	1	gnl|BL_ORD_ID|268679 sp|Q9LXV5|NFYA1_ARATH Nuclear transcription factor Y subunit A-1 OS=Arabidopsis thaliana OX=3702 GN=NFYA1 PE=2 SV=1//1.3592e-36
MS.gene29548	MS.gene29548	chr5.2:69059901-69066046	888	0.890362	0	0.264782	0.073329	0.073329	0	0.264782	0.890362	11.0482	1.55476	7.67441	-1.75762	5.42448e-07	0.525264	0.0338341	0.300719	0.000461392	1	0.825524	1	gnl|BL_ORD_ID|91434 sp|Q0WSN2|DAR2_ARATH Protein DA1-related 2 OS=Arabidopsis thaliana OX=3702 GN=DAR2 PE=2 SV=1//1.92339e-160
MS.gene05986	MS.gene05986	chr4.3:2980762-2984766	1497	5.41129	0	1.34211	0.101928	0.101928	0	1.34211	5.41129	13.015	3.51296	7.51314	-1.9552	9.57048e-05	0.15893	0.0385337	0.426527	0.0304295	1	0.872632	1	gnl|BL_ORD_ID|185290 sp|Q9SEK3|HXK1_SPIOL Hexokinase-1 OS=Spinacia oleracea OX=3562 GN=HXK1 PE=2 SV=1//0
MS.gene069364	MS.gene069364	chr7.1:87781911-87786049	3318	0.498688	0	0.0847325	0.0908955	0.0908955	0	0.0847325	0.498688	9.63911	-0.385218	7.40695	-2.55234	8.77032e-05	0.883275	0.042374	0.143136	0.0287505	1	0.904148	1	gnl|BL_ORD_ID|456383 sp|F4I116|SYLC_ARATH Leucine--tRNA ligase, cytoplasmic OS=Arabidopsis thaliana OX=3702 GN=At1g09620 PE=1 SV=1//0
MS.gene54326	MS.gene54326	chr2.3:69693839-69700724	2187	0.294594	0	0.0819725	0.0511745	0.0511745	0	0.0819725	0.294594	9.62637	0.417793	7.29819	-1.86469	8.99496e-05	0.873916	0.0482629	0.286726	0.0291683	1	0.952664	1	gnl|BL_ORD_ID|148188 sp|Q9C857|GDL16_ARATH GDSL esterase/lipase At1g31550 OS=Arabidopsis thaliana OX=3702 GN=At1g31550 PE=2 SV=1//2.22287e-96
MS.gene23771	MS.gene23771	chr8.4:30399283-30403777	981	0.486156	0	0.101351	0.0747845	0.0747845	0	0.101351	0.486156	9.72092	0.214886	7.25403	-2.21151	7.90177e-05	0.924556	0.0501528	0.0946986	0.0266847	1	0.964366	1	gnl|BL_ORD_ID|62885 sp|P36907|CHIX_PEA Endochitinase OS=Pisum sativum OX=3888 PE=2 SV=1//0
MS.gene005129	MS.gene005129	chr1.1:60072614-60073790	435	8.13267	0.145342	5.51051	0.140692	0.140692	0.145342	5.51051	8.13267	5.7505	4.9291	0.276828	-0.554388	7.85844e-05	0.000935643	0.92083	0.631726	0.0266847	0.11881	1	1	gnl|BL_ORD_ID|314162 sp|P29063|PR4B_TOBAC Pathogenesis-related protein PR-4B OS=Nicotiana tabacum OX=4097 PE=2 SV=1//3.85507e-71
MS.gene43996	MS.gene43996	chr1.3:57156278-57157367	378	8.54939	0.146283	5.6608	0.145703	0.145703	0.146283	5.6608	8.54939	5.79331	4.93907	0.276987	-0.588727	8.10074e-05	0.000939224	0.917732	0.611203	0.0270763	0.11913	1	1	gnl|BL_ORD_ID|314162 sp|P29063|PR4B_TOBAC Pathogenesis-related protein PR-4B OS=Nicotiana tabacum OX=4097 PE=2 SV=1//5.74381e-71
MS.gene96117	MS.gene96117	chr4.2:50730104-50732902	1176	1.28503	0.008376	0.34655	0	0	0.008376	0.34655	1.28503	6.84294	8.5694	-3.55791	-1.85447	0.000135231	0.001115	0.655791	0.130808	0.0392769	0.131765	1	1	gnl|BL_ORD_ID|14672 sp|Q9SJE8|ALMT2_ARATH Aluminum-activated malate transporter 2 OS=Arabidopsis thaliana OX=3702 GN=ALMT2 PE=2 SV=2//4.78418e-112
MS.gene072129	-	chr8.2:77235039-77253488	2493	1.9004	0.07749	0.539352	0	0	0.07749	0.539352	1.9004	7.61083	10.1433	-4.70304	-2.18823	9.31992e-07	0.00260175	0.451088	0.190081	0.000716376	0.2163	1	1	gnl|BL_ORD_ID|426894 sp|Q9JLI8|SART3_MOUSE Squamous cell carcinoma antigen recognized by T-cells 3 OS=Mus musculus OX=10090 GN=Sart3 PE=1 SV=1//8.49057e-90
MS.gene87649	-	chr3.1:59075566-59097239	297	4.33177	0.0521095	1.14987	0.079074	0.079074	0.0521095	1.14987	4.33177	5.80268	3.3795	0.940263	-1.51795	9.1165e-08	0.00341273	0.483407	0.10315	9.49871e-05	0.252613	1	1	-//-
MS.gene070048	MS.gene070048	chr8.4:53246460-53247085	435	42.1368	0.121386	18.9189	1.29067	1.29067	0.121386	18.9189	42.1368	8.36148	3.66382	3.6056	-1.12833	1.1173e-08	0.00437021	0.0607992	0.262869	1.49162e-05	0.291321	1	1	gnl|BL_ORD_ID|13516 sp|P62929|ALB1D_PEA Albumin-1 D OS=Pisum sativum OX=3888 PE=1 SV=1//3.62185e-20
MS.gene22522	MS.gene22522	chr2.2:47308697-47311734	990	3.68939	0	2.07223	0.054339	0.054339	0	2.07223	3.68939	12.0709	4.99609	6.2622	-0.79297	3.39198e-08	0.00517824	0.128785	0.475149	3.91086e-05	0.31662	1	1	gnl|BL_ORD_ID|62780 sp|P17541|CHIA_CUCSA Acidic endochitinase OS=Cucumis sativus OX=3659 PE=1 SV=1//1.09474e-83
MS.gene69388	MS.gene69388	chr3.3:93352356-93355318	945	2.43305	0.025907	0.37902	0	0	0.025907	0.37902	2.43305	6.49169	8.79256	-4.88873	-2.63738	7.18913e-05	0.010064	0.407226	0.114762	0.0250411	0.455696	1	1	gnl|BL_ORD_ID|301455 sp|Q7ZUC7|PGES2_DANRE Prostaglandin E synthase 2 OS=Danio rerio OX=7955 GN=ptges2 PE=2 SV=1//5.32547e-71
MS.gene046114	MS.gene046114	chr1.1:81446108-81447607	975	1.52726	0	2.39428	0.0902445	0.0902445	0	2.39428	1.52726	9.79865	4.48233	5.9459	0.669511	4.51663e-05	0.0118753	0.169352	0.56692	0.0173348	0.493679	1	1	gnl|BL_ORD_ID|299291 sp|P22195|PER1_ARAHY Cationic peroxidase 1 OS=Arachis hypogaea OX=3818 GN=PNC1 PE=1 SV=2//3.23194e-139
MS.gene44571	MS.gene44571	chr1.3:20590069-20592497	962	10.8193	0.565205	5.80072	0.555326	0.555326	0.565205	5.80072	10.8193	4.20698	3.10961	0.193694	-0.902894	6.54868e-05	0.0143753	0.891979	0.361857	0.0231782	0.544471	1	1	gnl|BL_ORD_ID|63370 sp|P93324|CHOMT_MEDSA Isoliquiritigenin 2&apos;-O-methyltransferase OS=Medicago sativa OX=3879 PE=1 SV=1//2.29042e-115
MS.gene000646	MS.gene000646	chr5.1:19458736-19470099	2190	0.462701	0	0.153576	0.0016545	0.0016545	0	0.153576	0.462701	10.9837	5.96561	3.38115	-1.59628	2.12268e-06	0.0225022	0.765508	0.360883	0.00141279	0.675903	1	1	gnl|BL_ORD_ID|17377 sp|Q96NW4|ANR27_HUMAN Ankyrin repeat domain-containing protein 27 OS=Homo sapiens OX=9606 GN=ANKRD27 PE=1 SV=2//5.52629e-06
MS.gene96475	MS.gene96475	chr1.2:21719330-21722855	1113	14.2056	0.493806	6.73628	0.887988	0.887988	0.493806	6.73628	14.2056	4.81731	2.65852	1.09576	-1.06931	3.7641e-05	0.0234223	0.412411	0.2906	0.0151553	0.691125	1	1	gnl|BL_ORD_ID|63370 sp|P93324|CHOMT_MEDSA Isoliquiritigenin 2&apos;-O-methyltransferase OS=Medicago sativa OX=3879 PE=1 SV=1//2.28893e-129
MS.gene83630	MS.gene83630	chr2.1:49061401-49064438	990	18.8252	0.0907735	5.64019	0.355496	0.355496	0.0907735	5.64019	18.8252	7.55914	3.7989	2.0966	-1.69583	4.90128e-09	0.0410259	0.322254	0.137912	7.21876e-06	0.883616	1	1	gnl|BL_ORD_ID|62780 sp|P17541|CHIA_CUCSA Acidic endochitinase OS=Cucumis sativus OX=3659 PE=1 SV=1//1.87739e-83
XLOC_086691	XLOC_086691	chr2.3:62531768-62537641	5874	0.953863	0	0.211546	0.0048335	0.0048335	0	0.211546	0.953863	11.0661	5.0252	3.81155	-2.1587	0.000115853	0.0500528	0.638388	0.29547	0.0348918	0.951912	1	1	-
MS.gene58820	MS.gene58820	chr7.3:20581914-20585998	3285	0.759251	0	0.576211	0.021572	0.021572	0	0.576211	0.759251	10.229	4.24359	5.52161	-0.406645	2.04251e-05	0.0528771	0.138943	0.819669	0.00931497	0.975822	1	1	-//-
MS.gene61659	MS.gene61659	chr4.1:46795564-46807104	1497	0.694706	0	0.197614	0.016928	0.016928	0	0.197614	0.694706	11.5989	3.29828	6.50747	-1.77748	3.93311e-08	0.184117	0.103085	0.292394	4.4511e-05	1	1	1	gnl|BL_ORD_ID|14672 sp|Q9SJE8|ALMT2_ARATH Aluminum-activated malate transporter 2 OS=Arabidopsis thaliana OX=3702 GN=ALMT2 PE=2 SV=2//1.44594e-142
XLOC_090257	XLOC_090257	chr2.4:45115340-45119951	844	2.16588	0	0.370103	0.0325105	0.0325105	0	0.370103	2.16588	10.339	2.85102	5.20469	-2.22807	2.48282e-05	0.10191	0.190436	0.120657	0.0108636	1	1	1	-
MS.gene044738	MS.gene044738	chr4.4:51234523-51237616	1416	0.900455	0	0.14071	0.013734	0.013734	0	0.14071	0.900455	10.0733	2.91931	4.50419	-2.61444	1.98119e-05	0.166861	0.495603	0.0772452	0.00911864	1	1	1	gnl|BL_ORD_ID|14672 sp|Q9SJE8|ALMT2_ARATH Aluminum-activated malate transporter 2 OS=Arabidopsis thaliana OX=3702 GN=ALMT2 PE=2 SV=2//5.00542e-138
MS.gene008160	MS.gene008160	chr3.4:69098090-69100602	816	0.937996	0	0.220481	0.120217	0.120217	0	0.220481	0.937996	9.83754	0.65524	7.11283	-2.05431	3.9179e-05	0.793529	0.0578721	0.235837	0.0155821	1	1	1	gnl|BL_ORD_ID|482172 sp|Q9LHT0|TRNHF_ARATH Tropinone reductase homolog At5g06060 OS=Arabidopsis thaliana OX=3702 GN=At5g06060 PE=2 SV=1//4.76015e-132
MS.gene57781	MS.gene57781	chr2.1:52689023-52693402	1125	0.398894	0	0.0719925	0.0350415	0.0350415	0	0.0719925	0.398894	9.40338	0.757846	6.12841	-2.46386	0.000129442	0.726973	0.0658823	0.156409	0.0380312	1	1	1	gnl|BL_ORD_ID|287620 sp|Q9SW00|ORP4B_ARATH Oxysterol-binding protein-related protein 4B OS=Arabidopsis thaliana OX=3702 GN=ORP4B PE=2 SV=2//1.34507e-134
MS.gene99213	MS.gene99213	chr8.4:26346174-26347810	741	5.40127	0.0455365	2.32476	0.183081	0.183081	0.0455365	2.32476	5.40127	6.63268	3.38085	2.01923	-1.21861	4.22806e-05	0.0683432	0.452761	0.286197	0.0164377	1	1	1	gnl|BL_ORD_ID|50435 sp|O65862|CAMT1_POPTR Caffeoyl-CoA O-methyltransferase 1 OS=Populus trichocarpa OX=3694 GN=CCOAOMT1 PE=2 SV=1//6.21208e-118
MS.gene44568	MS.gene44568	chr1.3:20452547-20457907	1212	2.9214	0.028426	0.750537	0.116833	0.116833	0.028426	0.750537	2.9214	6.57321	2.40537	2.18366	-1.97559	7.25217e-05	0.18028	0.391125	0.0706594	0.025161	1	1	1	gnl|BL_ORD_ID|63370 sp|P93324|CHOMT_MEDSA Isoliquiritigenin 2&apos;-O-methyltransferase OS=Medicago sativa OX=3879 PE=1 SV=1//3.00315e-67
MS.gene011804	MS.gene011804	chr8.1:26799643-26801266	741	5.21648	0.14276	1.52492	0.626231	0.626231	0.14276	1.52492	5.21648	5.12534	1.0153	2.33836	-1.78141	0.000111634	0.445207	0.135724	0.0959405	0.0338729	1	1	1	gnl|BL_ORD_ID|50435 sp|O65862|CAMT1_POPTR Caffeoyl-CoA O-methyltransferase 1 OS=Populus trichocarpa OX=3694 GN=CCOAOMT1 PE=2 SV=1//3.92995e-118
MS.gene68426	MS.gene68426	chr1.3:63440172-63444353	576	3.7831	0.136405	1.52325	0.3036	0.3036	0.136405	1.52325	3.7831	4.74162	2.09277	1.36291	-1.30325	3.46069e-05	0.0769203	0.335734	0.143514	0.0140831	1	1	1	gnl|BL_ORD_ID|337856 sp|O49841|RAC2A_ARATH Ras-related protein RABC2a OS=Arabidopsis thaliana OX=3702 GN=RABC2A PE=1 SV=1//4.31183e-91
MS.gene006051	MS.gene006051	chr1.3:67234660-67241851	2010	3.69644	0	1.54571	0	#N/A	#N/A	1.54571	3.69644	13.3235	12.0875	#N/A	-1.21889	7.50371e-13	0.000336375	#N/A	0.480159	2.80822e-09	0.0625906	#N/A	1	gnl|BL_ORD_ID|3930 sp|Q84TH5|AB25G_ARATH ABC transporter G family member 25 OS=Arabidopsis thaliana OX=3702 GN=ABCG25 PE=2 SV=1//0
MS.gene021467	MS.gene021467	chr1.4:11304667-11309537	1034	2.78599	0	2.12612	0	#N/A	#N/A	2.12612	2.78599	12.3645	11.9041	#N/A	-0.415501	1.14824e-09	0.000405506	#N/A	0.810445	1.98584e-06	0.0707195	#N/A	1	gnl|BL_ORD_ID|435638 sp|O81062|SIP_ARATH Signal peptide peptidase OS=Arabidopsis thaliana OX=3702 GN=SPP PE=2 SV=1//0
MS.gene057551	MS.gene057551	chr7.2:85432029-85433739	1113	1.12548	0	0.71844	0	#N/A	#N/A	0.71844	1.12548	9.54376	8.8717	#N/A	-0.631785	0.000100921	0.000478071	#N/A	0.613076	0.0314312	0.0785865	#N/A	1	gnl|BL_ORD_ID|63370 sp|P93324|CHOMT_MEDSA Isoliquiritigenin 2&apos;-O-methyltransferase OS=Medicago sativa OX=3879 PE=1 SV=1//8.73438e-179
MS.gene97604	MS.gene97604	chr7.4:87465531-87467241	1113	1.33048	0	0.718823	0	#N/A	#N/A	0.718823	1.33048	9.77964	8.86027	#N/A	-0.877014	0.00010504	0.000551654	#N/A	0.503333	0.0322738	0.0863213	#N/A	1	gnl|BL_ORD_ID|63370 sp|P93324|CHOMT_MEDSA Isoliquiritigenin 2&apos;-O-methyltransferase OS=Medicago sativa OX=3879 PE=1 SV=1//7.4768e-175
MS.gene006609	MS.gene006609	chr4.4:32057047-32060193	1218	2.74652	0	2.52045	0	#N/A	#N/A	2.52045	2.74652	11.6929	11.6005	#N/A	-0.0718119	1.86696e-05	0.000570635	#N/A	0.972554	0.00874352	0.0878957	#N/A	1	gnl|BL_ORD_ID|488659 sp|P36096|TUL1_YEAST Transmembrane E3 ubiquitin-protein ligase 1 OS=Saccharomyces cerevisiae (strain ATCC 204508 / S288c) OX=559292 GN=TUL1 PE=1 SV=1//4.76508e-22
MS.gene023212	MS.gene023212	chr4.3:18248336-18259470	1884	1.29783	0	0.651068	0	#N/A	#N/A	0.651068	1.29783	12.4461	11.471	#N/A	-0.957917	3.66531e-10	0.000658711	#N/A	0.573015	7.09111e-07	0.096591	#N/A	1	gnl|BL_ORD_ID|310619 sp|Q8H2D5|POLH_ARATH DNA polymerase eta OS=Arabidopsis thaliana OX=3702 GN=POLH PE=1 SV=1//0
MS.gene66291	MS.gene66291	41772:11544-24480	2214	0.405504	0	0.0614525	0	#N/A	#N/A	0.0614525	0.405504	10.9757	8.27206	#N/A	-2.66816	7.87815e-06	0.00123378	#N/A	0.0429214	0.00429235	0.139827	#N/A	1	gnl|BL_ORD_ID|224752 sp|Q764T8|LUPS_GLYGL Lupeol synthase OS=Glycyrrhiza glabra OX=49827 GN=LUS1 PE=1 SV=1//0
MS.gene067861	MS.gene067861	chr7.1:19012716-19014743	852	0.91495	0	0.39112	0	#N/A	#N/A	0.39112	0.91495	9.49669	8.26804	#N/A	-1.19996	0.000146735	0.00124704	#N/A	0.337949	0.0416642	0.140455	#N/A	1	gnl|BL_ORD_ID|295329 sp|Q8LGJ5|PCO2_ARATH Plant cysteine oxidase 2 OS=Arabidopsis thaliana OX=3702 GN=PCO2 PE=1 SV=1//3.0849e-73
MS.gene021793	MS.gene021793	chr7.1:83935222-83936930	1113	1.29384	0	0.448813	0	#N/A	#N/A	0.448813	1.29384	9.73943	8.2024	#N/A	-1.49949	8.59033e-05	0.00150409	#N/A	0.239407	0.0282984	0.156519	#N/A	1	gnl|BL_ORD_ID|63370 sp|P93324|CHOMT_MEDSA Isoliquiritigenin 2&apos;-O-methyltransferase OS=Medicago sativa OX=3879 PE=1 SV=1//1.50641e-177
XLOC_303808	XLOC_303808	chr8.2:18483306-18486493	3095	2.11859	0	1.09434	0	#N/A	#N/A	1.09434	2.11859	11.3503	10.416	#N/A	-0.91806	1.35035e-07	0.00197445	#N/A	0.590554	0.000132875	0.183893	#N/A	1	-
XLOC_180211	XLOC_180211	chr4.4:29162914-29168406	1227	2.00708	0	0.627421	0	#N/A	#N/A	0.627421	2.00708	12.0599	10.3986	#N/A	-1.64574	3.15461e-09	0.00201276	#N/A	0.327126	4.89907e-06	0.185523	#N/A	1	-
MS.gene066135	MS.gene066135	chr3.1:26735187-26738443	1338	1.87568	0	1.05157	0	#N/A	#N/A	1.05157	1.87568	11.2082	10.3108	#N/A	-0.850794	2.52713e-07	0.00217764	#N/A	0.61869	0.000237414	0.193381	#N/A	1	gnl|BL_ORD_ID|48654 sp|O22307|C71DB_LOTJA Cytochrome P450 71D11 (Fragment) OS=Lotus japonicus OX=34305 GN=CYP71D11 PE=2 SV=1//0
MS.gene033264	MS.gene033264	chr8.4:20885794-20888855	783	1.41453	0	0.965746	0	#N/A	#N/A	0.965746	1.41453	10.7151	10.0982	#N/A	-0.569816	1.86592e-06	0.00272091	#N/A	0.742666	0.00128304	0.221787	#N/A	1	gnl|BL_ORD_ID|249526 sp|Q9CWP6|MSPD2_MOUSE Motile sperm domain-containing protein 2 OS=Mus musculus OX=10090 GN=Mospd2 PE=1 SV=2//1.98377e-17
MS.gene051200	MS.gene051200	chr2.3:48960399-48962427	825	0.838736	0	1.13172	0	#N/A	#N/A	1.13172	0.838736	9.37439	9.81168	#N/A	0.451796	0.000139899	0.00366402	#N/A	0.80527	0.0400218	0.262158	#N/A	1	gnl|BL_ORD_ID|62864 sp|P51614|CHIT3_VITVI Acidic endochitinase OS=Vitis vinifera OX=29760 GN=CHIT3 PE=2 SV=1//4.35243e-80
MS.gene000239	MS.gene000239	chr2.3:23014401-23016558	615	0.898795	0	0.911985	0	#N/A	#N/A	0.911985	0.898795	9.55957	9.5916	#N/A	0.0498481	9.36212e-05	0.00454574	#N/A	0.979444	0.030017	0.297806	#N/A	1	-//-
MS.gene30978	MS.gene30978	chr3.3:79444193-79450339	2985	0.594891	0	0.318788	0	#N/A	#N/A	0.318788	0.594891	10.464	9.58391	#N/A	-0.862276	6.63071e-06	0.00458095	#N/A	0.623372	0.00370102	0.299172	#N/A	1	gnl|BL_ORD_ID|48286 sp|Q9LIH5|C3H38_ARATH Zinc finger CCCH domain-containing protein 38 OS=Arabidopsis thaliana OX=3702 GN=At3g18640 PE=2 SV=1//9.96701e-36
MS.gene045550	MS.gene045550	chr4.2:31109777-31110631	367	6.15067	0	1.51284	0	#N/A	#N/A	1.51284	6.15067	10.9898	8.9141	#N/A	-2.0284	6.46516e-07	0.00878351	#N/A	0.22956	0.000534755	0.422098	#N/A	1	gnl|BL_ORD_ID|285942 sp|B0ZB57|OMT3_HUMLU Probable O-methyltransferase 3 OS=Humulus lupulus OX=3486 GN=OMT3 PE=2 SV=1//1.61667e-36
MS.gene054405	MS.gene054405	chr7.4:4401649-4402983	636	1.54245	0	0.761061	0	#N/A	#N/A	0.761061	1.54245	9.65043	8.56224	#N/A	-1.04138	6.08294e-05	0.0125268	#N/A	0.551769	0.0219033	0.506557	#N/A	1	-//-
MS.gene070210	MS.gene070210	chr1.1:76281021-76282829	675	1.01091	0	0.298653	0	#N/A	#N/A	0.298653	1.01091	9.47457	7.73992	#N/A	-1.71967	9.97752e-05	0.0271656	#N/A	0.324129	0.031245	0.741584	#N/A	1	gnl|BL_ORD_ID|314152 sp|B6EUA9|PR40A_ARATH Pre-mRNA-processing protein 40A OS=Arabidopsis thaliana OX=3702 GN=PRP40A PE=1 SV=1//1.18728e-08
MS.gene059436	MS.gene059436	chr4.4:28248683-28251393	800	1.32109	0	0.176701	0	#N/A	#N/A	0.176701	1.32109	10.4319	7.56353	#N/A	-2.8514	1.31863e-05	0.0320806	#N/A	0.1051	0.00661604	0.800547	#N/A	1	gnl|BL_ORD_ID|291021 sp|Q9ZVF6|PAHX_ARATH Phytanoyl-CoA dioxygenase OS=Arabidopsis thaliana OX=3702 GN=PAHX PE=2 SV=2//1.64667e-143
MS.gene003427	MS.gene003427	chr4.1:28969041-28973142	1164	0.48451	0	0.0868065	0	#N/A	#N/A	0.0868065	0.48451	9.59517	7.06982	#N/A	-2.47487	7.87164e-05	0.0513664	#N/A	0.153109	0.0266847	0.961547	#N/A	1	gnl|BL_ORD_ID|428393 sp|Q0WPR4|SCP34_ARATH Serine carboxypeptidase-like 34 OS=Arabidopsis thaliana OX=3702 GN=SCPL34 PE=2 SV=2//0
MS.gene46262	MS.gene46262	chr3.1:71286595-71290766	1029	0	4.8227	2.44857	3.90925	3.90925	4.8227	2.44857	0	-12.8995	-0.953028	-0.00692584	11.9465	0.000139899	0.704022	0.998084	0.00030305	0.0400218	1	1	0.0543564	gnl|BL_ORD_ID|347743 sp|Q9FXM3|RFC2_ORYSJ Replication factor C subunit 2 OS=Oryza sativa subsp. japonica OX=39947 GN=RFC2 PE=2 SV=1//0
MS.gene050421	MS.gene050421	chr7.1:4421636-4428022	495	0	1.70589	1.58805	2.35313	2.35313	1.70589	1.58805	0	-12.0985	-0.840445	0.65602	11.9368	1.47967e-08	0.635154	0.540293	0.000306255	1.91927e-05	1	1	0.0548051	-//-
MS.gene53661	-	chr1.1:29971961-29974907	591	0	0.92141	0.859485	1.358	1.358	0.92141	0.859485	0	-9.48111	-0.876002	0.776482	9.39184	0.000111728	0.53688	0.558112	0.000310662	0.0338729	1	1	0.0552064	gnl|BL_ORD_ID|17707 sp|Q9ZUC1|AOR_ARATH NADPH-dependent alkenal/one oxidoreductase, chloroplastic OS=Arabidopsis thaliana OX=3702 GN=AOR PE=1 SV=2//2.52243e-58
MS.gene036719	MS.gene036719	chr8.2:13209317-13215366	2574	0	3.91362	1.60879	1.93482	1.93482	3.91362	1.60879	0	-13.1947	-0.445679	-0.797545	11.928	1.17978e-12	0.858357	0.656691	0.000314177	4.14353e-09	1	1	0.0557531	gnl|BL_ORD_ID|69407 sp|Q08CL8|CNO10_DANRE CCR4-NOT transcription complex subunit 10 OS=Danio rerio OX=7955 GN=cnot10 PE=2 SV=1//1.53518e-42
MS.gene022503	MS.gene022503	chr3.2:66715572-66720969	2334	0	3.48488	1.81795	1.25532	1.25532	3.48488	1.81795	0	-12.8493	0.255387	-1.23424	11.8886	1.35691e-11	0.917801	0.482348	0.000322732	4.0759e-08	1	1	0.0568827	gnl|BL_ORD_ID|47745 sp|Q9SGZ5|BXL7_ARATH Probable beta-D-xylosidase 7 OS=Arabidopsis thaliana OX=3702 GN=BXL7 PE=2 SV=2//0
MS.gene34570	MS.gene34570	chr1.4:78159388-78162129	305	0	0.60751	0.398675	0.793524	0.793524	0.60751	0.398675	0	-9.38843	-1.22521	0.585255	8.75355	0.00018279	0.324775	0.650486	0.000323226	0.0490929	1	1	0.0569267	gnl|BL_ORD_ID|548195 sp|Q9HFF2|YL92_SCHPO Uncharacterized protein C683.02c OS=Schizosaccharomyces pombe (strain 972 / ATCC 24843) OX=284812 GN=SPAC683.02c PE=4 SV=1//6.43645e-08
MS.gene77488	MS.gene77488	chr3.2:72213606-72221407	765	0	0.850719	1.12362	0.515757	0.515757	0.850719	1.12362	0	-11.3756	0.844361	-0.517957	11.7264	2.03771e-07	0.730454	0.774878	0.000389708	0.000195457	1	1	0.0641857	gnl|BL_ORD_ID|113681 sp|A4YTY9|EFP_BRASO Elongation factor P OS=Bradyrhizobium sp. (strain ORS 278) OX=114615 GN=efp PE=3 SV=1//7.26204e-35
MS.gene74819	MS.gene74819	41791:48007-52979	3312	0	3.10142	1.68709	3.18809	3.18809	3.10142	1.68709	0	-12.5757	-1.18916	0.26159	11.6632	1.11055e-10	0.493917	0.783744	0.000417324	2.43776e-07	1	1	0.0672183	gnl|BL_ORD_ID|314220 sp|Q947D2|PRAF1_ARATH PH, RCC1 and FYVE domains-containing protein 1 OS=Arabidopsis thaliana OX=3702 GN=PRAF1 PE=1 SV=1//5.85521e-22
XLOC_158478	XLOC_158478	chr4.2:28245145-28249758	4239	0	0.544222	0.233617	0.310928	0.310928	0.544222	0.233617	0	-9.97382	-0.613542	-0.59667	8.75062	3.03738e-05	0.74731	0.751644	0.000418259	0.012817	1	1	0.0672975	-
MS.gene051614	MS.gene051614	chr1.3:5879214-5883920	1968	0	0.342285	0.264234	0.131397	0.131397	0.342285	0.264234	0	-9.31182	0.773738	-1.14537	8.9398	0.000155479	0.688449	0.540538	0.000431039	0.0436047	1	1	0.0686233	gnl|BL_ORD_ID|63763 sp|Q9LI74|CHUP1_ARATH Protein CHUP1, chloroplastic OS=Arabidopsis thaliana OX=3702 GN=CHUP1 PE=1 SV=1//2.3461e-13
MS.gene66927	MS.gene66927	chr1.4:4624132-4627056	1359	0	5.81036	2.67388	6.01681	6.01681	5.81036	2.67388	0	-12.7088	-1.43975	0.279689	11.5612	3.78902e-11	0.405818	0.765511	0.000466938	1.01764e-07	1	1	0.072511	-//-
MS.gene59358	MS.gene59358	chr5.4:12159679-12164761	1350	0	0.892031	0.248326	0.18552	0.18552	0.892031	0.248326	0	-10.8416	0.16617	-2.07784	8.95399	5.69385e-06	0.939819	0.265895	0.000474273	0.00327416	1	1	0.0731569	gnl|BL_ORD_ID|48823 sp|O64989|C90B1_ARATH Cytochrome P450 90B1 OS=Arabidopsis thaliana OX=3702 GN=CYP90B1 PE=1 SV=2//0
MS.gene71996	MS.gene71996	chr8.1:22862138-22865473	669	0	0.633163	0.642448	0.417751	0.417751	0.633163	0.642448	0	-9.75148	0.36312	-0.422595	9.70665	0.000162579	0.865557	0.829733	0.00052973	0.044879	1	1	0.0787058	gnl|BL_ORD_ID|502021 sp|Q9LVU1|VAP21_ARATH Vesicle-associated protein 2-1 OS=Arabidopsis thaliana OX=3702 GN=PVA21 PE=1 SV=1//1.72968e-71
MS.gene68275	MS.gene68275	24032:7798-12174	1056	0	3.04982	1.59258	3.18006	3.18006	3.04982	1.59258	0	-12.3754	-1.26795	0.272431	11.3959	6.60671e-10	0.462244	0.778759	0.000559865	1.21696e-06	1	1	0.0816773	gnl|BL_ORD_ID|434521 sp|Q8VWF1|SH3P2_ARATH SH3 domain-containing protein 2 OS=Arabidopsis thaliana OX=3702 GN=SH3P2 PE=1 SV=1//0
MS.gene00744	MS.gene00744	chr2.4:62932764-62936342	669	0	4.10055	1.85365	0.468595	0.468595	4.10055	1.85365	0	-12.5028	1.78092	-2.89878	11.3746	1.77492e-10	0.467207	0.0948272	0.000583751	3.6504e-07	1	1	0.0840052	gnl|BL_ORD_ID|17742 sp|Q56X52|AOX4_ARATH Ubiquinol oxidase 4, chloroplastic/chromoplastic OS=Arabidopsis thaliana OX=3702 GN=AOX4 PE=1 SV=2//2.54234e-123
MS.gene066951	MS.gene066951	chr5.4:65232648-65237468	1393	0	0.53557	0.188014	0.599945	0.599945	0.53557	0.188014	0	-9.98013	-1.90003	0.409966	8.48552	2.85163e-05	0.123848	0.737755	0.00062464	0.0121003	1	1	0.0884227	gnl|BL_ORD_ID|306392 sp|Q39033|PLCD2_ARATH Phosphoinositide phospholipase C 2 OS=Arabidopsis thaliana OX=3702 GN=PLC2 PE=1 SV=1//0
MS.gene51038	MS.gene51038	chr8.2:18236009-18237600	639	0	6.0002	4.04788	2.80778	2.80778	6.0002	4.04788	0	-11.8399	0.24778	-0.816339	11.2818	2.00307e-07	0.919627	0.659965	0.000645152	0.000192945	1	1	0.0905041	-//-
MS.gene34072	MS.gene34072	chr1.2:73992734-73995687	2229	0	3.56995	2.00004	1.66329	1.66329	3.56995	2.00004	0	-12.021	0.0804509	-0.870937	11.2081	3.94049e-09	0.965986	0.436446	0.000709604	5.95742e-06	1	1	0.0961409	gnl|BL_ORD_ID|326396 sp|Q9SS47|PUM4_ARATH Pumilio homolog 4 OS=Arabidopsis thaliana OX=3702 GN=APUM4 PE=1 SV=2//1.20791e-09
MS.gene008845	-	chr8.1:35144407-35149196	339	0.000727	1.03091	0.458151	0.205715	0.205715	1.03091	0.458151	0.000727	-8.38055	0.858745	-2.02498	7.20139	7.96109e-06	0.553546	0.108955	0.000738995	0.00431693	1	1	0.0984666	gnl|BL_ORD_ID|326279 sp|Q9SW11|PUB35_ARATH U-box domain-containing protein 35 OS=Arabidopsis thaliana OX=3702 GN=PUB35 PE=2 SV=2//1.73659e-07
MS.gene013134	MS.gene013134	chr3.1:79426889-79434296	2417	0	4.19328	0.775702	4.61937	4.61937	4.19328	0.775702	0	-13.5972	-2.84086	0.346229	11.1177	2.82385e-13	0.104974	0.711198	0.000768364	1.26403e-09	1	1	0.101341	gnl|BL_ORD_ID|129207 sp|Q9M9E8|FB92_ARATH F-box protein At1g78280 OS=Arabidopsis thaliana OX=3702 GN=At1g78280 PE=2 SV=3//0
MS.gene011769	MS.gene011769	chr8.2:25011163-25016786	960	0	0.470348	0.972169	1.17905	1.17905	0.470348	0.972169	0	-10.034	-0.467751	1.54635	11.0965	1.95819e-05	0.791434	0.169262	0.000795688	0.00905648	1	1	0.103658	gnl|BL_ORD_ID|247944 sp|Q94C32|MRG1_ARATH Protein MRG1 OS=Arabidopsis thaliana OX=3702 GN=MRG1 PE=1 SV=1//7.87367e-143
MS.gene025621	MS.gene025621	chr7.3:8985325-8989931	1206	0	0.984557	0.396289	0.149483	0.149483	0.984557	0.396289	0	-10.7836	1.20689	-2.45398	9.51954	2.68615e-06	0.564673	0.17578	0.000813004	0.00172738	1	1	0.104919	gnl|BL_ORD_ID|295884 sp|Q2YDC9|PDCD2_BOVIN Programmed cell death protein 2 OS=Bos taurus OX=9913 GN=PDCD2 PE=2 SV=1//8.51833e-51
MS.gene82134	MS.gene82134	chr5.2:17084041-17092652	1776	0	3.69273	0.604672	0.132828	0.132828	3.69273	0.604672	0	-13.5601	1.98297	-4.4934	11.0257	8.46291e-05	0.417768	0.094461	0.000857445	0.0279999	1	1	0.109088	gnl|BL_ORD_ID|130464 sp|C0LGF4|FEI1_ARATH LRR receptor-like serine/threonine-protein kinase FEI 1 OS=Arabidopsis thaliana OX=3702 GN=FEI1 PE=1 SV=1//0
MS.gene75183	MS.gene75183	chr1.3:74650796-74654064	2568	0	3.38171	1.48525	1.13804	1.13804	3.38171	1.48525	0	-12.0795	0.184513	-1.3271	10.9235	3.1042e-09	0.940745	0.451894	0.000953693	4.85381e-06	1	1	0.116941	gnl|BL_ORD_ID|478644 sp|O23617|TPS5_ARATH Alpha,alpha-trehalose-phosphate synthase [UDP-forming] 5 OS=Arabidopsis thaliana OX=3702 GN=TPS5 PE=1 SV=2//0
MS.gene03845	MS.gene03845	chr4.1:44911468-44914625	258	0	1.41592	1.4734	2.10783	2.10783	1.41592	1.4734	0	-10.8389	-0.714231	0.737394	10.863	0.000129042	0.77096	0.728033	0.00101532	0.0379624	1	1	0.122019	-//-
MS.gene70756	MS.gene70756	chr3.3:67462475-67464775	1611	0	9.46065	1.91316	12.8104	12.8104	9.46065	1.91316	0	-13.1207	-3.0117	0.599241	10.7341	0.000114821	0.0823153	0.743413	0.00115542	0.0346723	1	1	0.133154	gnl|BL_ORD_ID|79166 sp|F4KIF3|CSA1_ARATH Disease resistance-like protein CSA1 OS=Arabidopsis thaliana OX=3702 GN=CSA1 PE=4 SV=1//1.29635e-35
MS.gene014853	-	chr3.3:87568858-87573211	480	0	4.36786	0.985789	3.37669	3.37669	4.36786	0.985789	0	-11.9537	-0.66259	-0.642961	10.6653	6.92478e-09	0.785964	0.717737	0.00124357	9.75833e-06	1	1	0.139333	gnl|BL_ORD_ID|19279 sp|Q9LFP0|APT5_ARATH Adenine phosphoribosyltransferase 5 OS=Arabidopsis thaliana OX=3702 GN=APT5 PE=1 SV=1//3.24699e-82
XLOC_264349	XLOC_264349	chr7.2:34551966-34588010	7564	0	1.47148	0.063995	0.483965	0.483965	1.47148	0.063995	0	-13.332	-3.36875	-1.35848	8.59719	2.17748e-08	0.011273	0.296883	0.00129158	2.65826e-05	0.481544	1	0.143233	-
MS.gene025721	MS.gene025721	chr7.4:6508013-6516357	639	0	0.582113	0.474515	0.23897	0.23897	0.582113	0.474515	0	-10.9359	0.804729	-1.09184	10.6309	2.45671e-06	0.741835	0.554607	0.00131247	0.00161161	1	1	0.144769	gnl|BL_ORD_ID|79301 sp|Q9C942|CSE_ARATH Caffeoylshikimate esterase OS=Arabidopsis thaliana OX=3702 GN=CSE PE=1 SV=1//1.67744e-35
MS.gene025792	MS.gene025792	chr5.3:5361893-5365033	1356	0	2.30222	1.24787	0.469861	0.469861	2.30222	1.24787	0	-11.4657	1.22728	-2.04965	10.6156	9.15382e-08	0.616453	0.250698	0.00133626	9.49871e-05	1	1	0.145748	gnl|BL_ORD_ID|163361 sp|Q94BV5|GSXL4_ARATH Flavin-containing monooxygenase FMO GS-OX-like 4 OS=Arabidopsis thaliana OX=3702 GN=At1g62600 PE=2 SV=1//0
MS.gene23477	MS.gene23477	chr7.3:14410587-14414584	1215	0	1.54443	0.970594	6.08102	6.08102	1.54443	0.970594	0	-11.2353	-2.91412	2.2228	10.5524	2.94194e-07	0.0903164	0.0262026	0.0014059	0.000273013	1	0.739515	0.150104	gnl|BL_ORD_ID|476361 sp|Q9LNC6|TOL2_ARATH TOM1-like protein 2 OS=Arabidopsis thaliana OX=3702 GN=TOL2 PE=1 SV=1//5.33619e-100
MS.gene22777	MS.gene22777	50591:10260-13443	1430	0	2.29004	1.14999	0.543816	0.543816	2.29004	1.14999	0	-11.4867	0.900577	-1.84177	10.5199	6.69009e-08	0.71235	0.299809	0.00147209	7.1368e-05	1	1	0.154212	gnl|BL_ORD_ID|29459 sp|P42211|ASPRX_ORYSJ Aspartic proteinase OS=Oryza sativa subsp. japonica OX=39947 GN=RAP PE=2 SV=2//0
MS.gene020790	MS.gene020790	chr5.3:77369951-77371522	435	0	2.87102	2.27129	3.36576	3.36576	2.87102	2.27129	0	-10.7772	-0.758897	0.485982	10.4824	2.57013e-06	0.665559	0.669969	0.00152268	0.0016716	1	1	0.157743	-//-
MS.gene31775	MS.gene31775	chr1.1:13733310-13735121	1719	0	1.18328	0.388318	0.95204	0.95204	1.18328	0.388318	0	-9.72749	-1.5032	-0.0795295	8.13989	4.794e-05	0.296151	0.956656	0.00152412	0.0181797	1	1	0.157822	gnl|BL_ORD_ID|223321 sp|P93604|LRK10_WHEAT Rust resistance kinase Lr10 OS=Triticum aestivum OX=4565 GN=LRK10 PE=2 SV=1//1.76915e-116
MS.gene046979	MS.gene046979	51521:201-2987	1272	0	1.97489	1.25616	2.68471	2.68471	1.97489	1.25616	0	-11.0847	-1.28494	0.671006	10.4524	4.33665e-07	0.458614	0.524732	0.00158465	0.000377866	1	1	0.162025	gnl|BL_ORD_ID|341726 sp|Q8W4B1|RCF3_ARATH RNA-binding KH domain-containing protein RCF3 OS=Arabidopsis thaliana OX=3702 GN=RCF3 PE=1 SV=1//3.4508e-06
MS.gene022372	MS.gene022372	chr3.1:62957875-62963773	1593	0	1.0485	0.5928	0.476685	0.476685	1.0485	0.5928	0	-11.2733	0.134624	-0.934866	10.4524	2.95996e-07	0.957435	0.605698	0.00158459	0.000273574	1	1	0.162025	gnl|BL_ORD_ID|310185 sp|F4HVJ3|POD1_ARATH Protein POLLEN DEFECTIVE IN GUIDANCE 1 OS=Arabidopsis thaliana OX=3702 GN=POD1 PE=1 SV=1//1.95498e-171
XLOC_279593	XLOC_279593	chr7.3:33970085-33972443	2240	0	2.08666	1.45086	0.117302	0.117302	2.08666	1.45086	0	-10.9709	3.31423	-3.93501	10.3699	1.53424e-05	0.121438	0.0184856	0.00169613	0.00751608	1	0.632927	0.169694	-
MS.gene024620	MS.gene024620	chr7.3:2603170-2609753	2550	0	0.535478	0.506931	0.392631	0.392631	0.535478	0.506931	0	-10.403	0.0926946	-0.168665	10.3371	3.34404e-05	0.971005	0.930632	0.00175846	0.0137648	1	1	0.17326	gnl|BL_ORD_ID|106328 sp|Q0DKP4|DRB2_ORYSJ Double-stranded RNA-binding protein 2 OS=Oryza sativa subsp. japonica OX=39947 GN=DRB2 PE=2 SV=1//3.56507e-70
MS.gene57569	MS.gene57569	chr8.4:8918680-8923005	801	0	1.51289	0.723374	0.555399	0.555399	1.51289	0.723374	0	-11.3179	0.199968	-1.19639	10.2928	2.12469e-07	0.936362	0.505912	0.00186581	0.000202101	1	1	0.179523	gnl|BL_ORD_ID|541437 sp|Q07379|YD057_YEAST Putative uncharacterized protein YDL057W OS=Saccharomyces cerevisiae (strain ATCC 204508 / S288c) OX=559292 GN=YDL057W PE=1 SV=1//1.76961e-11
MS.gene040548	MS.gene040548	chr2.3:27127590-27128677	990	0	2.6009	2.74135	1.85932	1.85932	2.6009	2.74135	0	-10.0996	0.364631	-0.223058	10.2236	2.76121e-05	0.880625	0.907839	0.00200066	0.0117603	1	1	0.188085	-//-
MS.gene064691	MS.gene064691	chr3.4:97188916-97193961	1329	0.0374125	17.2969	6.25346	4.83417	4.83417	17.2969	6.25346	0.0374125	-8.78119	0.108944	-1.59467	7.26731	4.1836e-13	0.960176	0.273786	0.00206121	1.73649e-09	1	1	0.191924	gnl|BL_ORD_ID|18000 sp|Q9SB50|AP4M_ARATH AP-4 complex subunit mu OS=Arabidopsis thaliana OX=3702 GN=AP4M PE=2 SV=1//0
MS.gene009267	MS.gene009267	chr3.2:2646-7569	1038	0	0.786741	0.575355	0.43164	0.43164	0.786741	0.575355	0	-10.6266	0.138503	-0.688781	10.1015	3.058e-05	0.941248	0.618588	0.00222467	0.0128802	1	1	0.20157	gnl|BL_ORD_ID|234435 sp|Q940H7|MES12_ARATH Putative methylesterase 12, chloroplastic OS=Arabidopsis thaliana OX=3702 GN=MES12 PE=2 SV=1//6.49153e-169
MS.gene08856	MS.gene08856	chr4.2:13692980-13694455	714	0	2.84388	1.89999	1.07886	1.07886	2.84388	1.89999	0	-10.6942	0.536367	-1.16605	10.084	1.98322e-06	0.826823	0.518211	0.00226848	0.00134347	1	1	0.203287	gnl|BL_ORD_ID|148177 sp|Q9SFC6|GDIR_ARATH Rho GDP-dissociation inhibitor 1 OS=Arabidopsis thaliana OX=3702 GN=GDI1 PE=1 SV=1//4.73988e-82
MS.gene050856	MS.gene050856	chr7.3:4907441-4915856	3013	0	0.754475	0.324587	0.340174	0.340174	0.754475	0.324587	0	-11.2901	-0.265794	-0.915528	10.0968	1.76589e-07	0.913054	0.607048	0.00226817	0.000171546	1	1	0.203287	gnl|BL_ORD_ID|441703 sp|Q9SMX9|SPL1_ARATH Squamosa promoter-binding-like protein 1 OS=Arabidopsis thaliana OX=3702 GN=SPL1 PE=1 SV=2//0
MS.gene054847	MS.gene054847	chr7.4:19503408-19506534	574	0	1.22863	0.674763	0.31132	0.31132	1.22863	0.674763	0	-10.5288	0.908544	-1.68927	9.72726	1.83242e-05	0.707794	0.370735	0.00335399	0.008643	1	1	0.259164	-//-
XLOC_329057	XLOC_329057	chr8.4:29258651-29286827	801	0	0.159778	0.0726305	0.01336	0.01336	0.159778	0.0726305	0	-10.8353	2.14833	-3.36567	9.63408	7.54034e-06	0.379829	0.0746076	0.00361762	0.00412698	1	1	0.272648	-
MS.gene073566	-	chr1.1:33795315-33798138	645	0.167584	6.0317	2.49065	2.68754	2.68754	6.0317	2.49065	0.167584	-5.16611	-0.375789	-0.941426	3.83924	2.73912e-05	0.745945	0.382009	0.00383789	0.0117099	1	1	0.282953	gnl|BL_ORD_ID|439009 sp|P28759|SODF_SOYBN Superoxide dismutase [Fe], chloroplastic OS=Glycine max OX=3847 GN=SODB PE=2 SV=1//1.74421e-95
MS.gene003237	-	chr2.4:60688212-60690643	537	0	1.13809	0.796784	0.328512	0.328512	1.13809	0.796784	0	-9.96325	1.0479	-1.5456	9.469	2.68525e-05	0.669437	0.401846	0.00424423	0.0115228	1	1	0.298773	gnl|BL_ORD_ID|531085 sp|Q84WN0|Y4920_ARATH Uncharacterized protein At4g37920 OS=Arabidopsis thaliana OX=3702 GN=At4g37920 PE=2 SV=2//1.42129e-23
MS.gene76308	-	chr1.1:78158176-78160976	789	0	0.832229	0.172252	0.534088	0.534088	0.832229	0.172252	0	-9.78092	-1.81592	-0.378041	7.57193	5.72558e-05	0.189537	0.772686	0.00496733	0.0209469	1	1	0.328285	gnl|BL_ORD_ID|199432 sp|Q6S591|JAG_ARATH Zinc finger protein JAGGED OS=Arabidopsis thaliana OX=3702 GN=JAG PE=2 SV=1//1.2431e-28
MS.gene047318	MS.gene047318	chr2.3:75793508-75795222	653	0	1.21796	0.906586	1.26982	1.26982	1.21796	0.906586	0	-9.706	-0.67914	0.274658	9.2885	5.55505e-05	0.707738	0.828328	0.00520903	0.0204212	1	1	0.338534	gnl|BL_ORD_ID|553993 sp|Q2V3L3|YY1_ARATH Zinc finger transcription factor YY1 OS=Arabidopsis thaliana OX=3702 GN=YY1 PE=1 SV=1//7.32842e-40
MS.gene068210	MS.gene068210	chr1.4:36756371-36762095	2808	0.045176	1.53483	1.06009	0.596263	0.596263	1.53483	1.06009	0.045176	-5.05177	0.648062	-1.10559	4.55046	0.000135794	0.706447	0.462619	0.00527016	0.0393404	1	1	0.340436	gnl|BL_ORD_ID|133355 sp|Q9CAE3|FLD_ARATH Protein FLOWERING LOCUS D OS=Arabidopsis thaliana OX=3702 GN=FLD PE=1 SV=1//0
MS.gene022535	MS.gene022535	chr8.4:81044761-81053063	3159	0.284176	5.48003	2.69493	3.50108	3.50108	5.48003	2.69493	0.284176	-4.27048	-0.642253	-0.399164	3.21914	3.82881e-05	0.551365	0.671183	0.00594255	0.0153347	1	1	0.364526	gnl|BL_ORD_ID|69421 sp|A1A5H6|CNOT1_DANRE CCR4-NOT transcription complex subunit 1 OS=Danio rerio OX=7955 GN=cnot1 PE=2 SV=1//2.34135e-15
MS.gene009228	MS.gene009228	chr8.1:42308986-42311357	738	0	1.16033	0.584298	0.342678	0.342678	1.16033	0.584298	0	-10.0599	0.480256	-1.47597	9.06838	3.26129e-05	0.802131	0.274732	0.00634307	0.0135121	1	1	0.376352	-//-
MS.gene007009	MS.gene007009	51711:36300-40699	1177	0	3.85968	0.305247	0.673914	0.673914	3.85968	0.305247	0	-12.7285	-1.32977	-2.31109	9.08073	9.8199e-11	0.58494	0.187065	0.00637655	2.19782e-07	1	1	0.376999	gnl|BL_ORD_ID|46672 sp|Q8LFS6|BRN1L_ARATH RNA-binding protein BRN1 OS=Arabidopsis thaliana OX=3702 GN=BRN1 PE=2 SV=1//1.96602e-166
MS.gene004537	MS.gene004537	chr2.1:57013960-57015216	453	0	1.64153	1.01488	1.28907	1.28907	1.64153	1.01488	0	-9.67011	-0.527013	-0.115939	9.00031	5.88521e-05	0.832237	0.953562	0.00687162	0.0214279	1	1	0.392519	gnl|BL_ORD_ID|449340 sp|Q84WN3|SWT17_ARATH Bidirectional sugar transporter SWEET17 OS=Arabidopsis thaliana OX=3702 GN=SWEET17 PE=1 SV=2//3.44513e-58
MS.gene053326	MS.gene053326	chr1.3:24524027-24528846	2257	0	1.08533	0.260854	0.0434245	0.0434245	1.08533	0.260854	0	-10.9705	2.29419	-4.26087	8.97649	7.54163e-06	0.263293	0.00612881	0.00704894	0.00412698	1	0.360273	0.398795	gnl|BL_ORD_ID|11953 sp|Q9XGW1|AGO10_ARATH Protein argonaute 10 OS=Arabidopsis thaliana OX=3702 GN=AGO10 PE=2 SV=1//0
MS.gene020482	MS.gene020482	57581:10373-15113	1452	0	0.603854	0.267702	0.134158	0.134158	0.603854	0.267702	0	-10.1273	0.728019	-1.90965	8.94806	1.8778e-05	0.763323	0.301221	0.00717893	0.00874861	1	1	0.402867	gnl|BL_ORD_ID|164849 sp|Q9CAC1|GUN8_ARATH Endoglucanase 8 OS=Arabidopsis thaliana OX=3702 GN=CEL1 PE=2 SV=1//0
MS.gene070325	MS.gene070325	chr4.1:5977184-5978552	1173	0	1.15067	0.8951	1.33394	1.33394	1.15067	0.8951	0	-9.30038	-0.768847	0.423597	8.94	0.000161098	0.673212	0.738346	0.00728741	0.0446323	1	1	0.405798	gnl|BL_ORD_ID|220335 sp|O24371|LOX31_SOLTU Linoleate 13S-lipoxygenase 3-1, chloroplastic OS=Solanum tuberosum OX=4113 GN=LOX3.1 PE=1 SV=1//3.11411e-07
MS.gene40138	MS.gene40138	chr4.3:21993095-21995239	1287	0	1.08094	0.524989	0.588609	0.588609	1.08094	0.524989	0	-9.84792	-0.337843	-0.661521	8.82464	3.34639e-05	0.891572	0.722725	0.00831945	0.0137648	1	1	0.436176	gnl|BL_ORD_ID|130351 sp|Q9ZV94|FDL11_ARATH Putative F-box/FBD/LRR-repeat protein At1g78760 OS=Arabidopsis thaliana OX=3702 GN=At1g78760 PE=4 SV=1//3.21491e-19
MS.gene54613	MS.gene54613	chr5.3:6463310-6467831	1482	0	1.53534	0.245341	2.06448	2.06448	1.53534	0.245341	0	-11.4141	-3.26091	0.661337	8.7977	1.00074e-07	0.0558434	0.518869	0.00852448	0.00010199	0.994241	1	0.442002	gnl|BL_ORD_ID|143182 sp|Q8W4H1|GAT26_ARATH GATA transcription factor 26 OS=Arabidopsis thaliana OX=3702 GN=GATA26 PE=2 SV=1//6.84984e-129
MS.gene031480	MS.gene031480	chr4.2:27537868-27540978	1167	0	0.697311	0.350824	0.508993	0.508993	0.697311	0.350824	0	-9.76708	-0.814124	-0.239204	8.72961	5.89669e-05	0.654271	0.859677	0.00900401	0.0214355	1	1	0.456952	-//-
MS.gene57056	MS.gene57056	37958:25732-28679	2102	0	0.825975	0.348052	0.277546	0.277546	0.825975	0.348052	0	-9.9259	0.0578133	-1.35639	8.63684	3.00619e-05	0.984371	0.466321	0.00980514	0.0127089	1	1	0.479777	gnl|BL_ORD_ID|438074 sp|O80875|SMXL7_ARATH Protein SMAX1-LIKE 7 OS=Arabidopsis thaliana OX=3702 GN=SMXL7 PE=1 SV=1//1.36873e-88
MS.gene91458	MS.gene91458	chr4.2:66268400-66270282	363	0	0.863281	0.175273	0.352963	0.352963	0.863281	0.175273	0	-9.32844	-1.18363	-1.0444	7.09559	0.00014813	0.561398	0.575857	0.0100976	0.041956	1	1	0.488055	gnl|BL_ORD_ID|31765 sp|Q6Z1D5|ATG8C_ORYSJ Autophagy-related protein 8C OS=Oryza sativa subsp. japonica OX=39947 GN=ATG8C PE=2 SV=1//7.20604e-48
MS.gene012746	MS.gene012746	chr8.1:671762-672711	534	0	1.66876	1.04454	0	0	1.66876	1.04454	0	-9.30127	8.52555	-9.24569	8.58812	0.000154744	0.0128686	0.00025937	0.0102715	0.0434518	0.514389	0.051755	0.490916	-//-
MS.gene015637	MS.gene015637	chr4.1:1461323-1464033	750	0	1.1283	0.353032	0.649343	0.649343	1.1283	0.353032	0	-10.2357	-1.06819	-0.557106	8.59359	1.04492e-05	0.55447	0.648609	0.01042	0.00541562	1	1	0.494774	gnl|BL_ORD_ID|505436 sp|Q9ZUA5|VIT1_ARATH Vacuolar iron transporter 1 OS=Arabidopsis thaliana OX=3702 GN=VIT1 PE=2 SV=1//2.54509e-119
MS.gene047971	MS.gene047971	chr2.4:64416138-64418549	1632	0	0.753861	0.401273	0.043344	0.043344	0.753861	0.401273	0	-9.49267	2.88119	-3.82665	8.56313	9.42523e-05	0.248256	0.0380124	0.010574	0.0300514	1	0.869044	0.497695	-//-
MS.gene29620	MS.gene29620	chr5.1:64442236-64487125	1269	0	0.0923895	0.0253955	0.008799	0.008799	0.0923895	0.0253955	0	-10.2441	1.11714	-2.84379	8.52481	0.00016493	0.64771	0.163686	0.0109363	0.0454182	1	1	0.507009	gnl|BL_ORD_ID|116186 sp|Q0JQS5|EGY2_ORYSJ Probable zinc metalloprotease EGY2, chloroplastic OS=Oryza sativa subsp. japonica OX=39947 GN=EGY2 PE=2 SV=1//0
MS.gene03699	MS.gene03699	chr4.3:43741652-43752492	2280	0	0.453947	0.0867955	0.075978	0.075978	0.453947	0.0867955	0	-10.9199	-0.0899121	-2.33644	8.5118	8.67106e-07	0.972901	0.189343	0.0110898	0.000680355	1	1	0.510699	gnl|BL_ORD_ID|103391 sp|Q42572|DNLI1_ARATH DNA ligase 1 OS=Arabidopsis thaliana OX=3702 GN=LIG1 PE=2 SV=2//0
MS.gene047957	MS.gene047957	chr2.4:64603404-64606425	1089	0	2.81623	0.305155	1.02288	1.02288	2.81623	0.305155	0	-11.6954	-1.94105	-1.20887	8.52954	3.96545e-08	0.425668	0.497812	0.0110864	4.45945e-05	1	1	0.510699	gnl|BL_ORD_ID|9834 sp|Q6DHV7|ADAL_HUMAN Adenosine deaminase-like protein OS=Homo sapiens OX=9606 GN=ADAL PE=2 SV=2//3.14667e-74
MS.gene88895	MS.gene88895	chr1.1:70657505-70661063	813	0.398249	7.88036	3.8987	3.76745	3.76745	7.88036	3.8987	0.398249	-4.31168	-0.153393	-0.826672	3.30755	3.58566e-05	0.914329	0.502067	0.0118485	0.0145136	1	1	0.529775	-//-
MS.gene69139	MS.gene69139	chr3.3:92443177-92445281	660	0	1.03288	0.404078	0.388579	0.388579	1.03288	0.404078	0	-9.74595	-0.142594	-1.16371	8.42781	4.52563e-05	0.955937	0.526294	0.0121722	0.0173348	1	1	0.537772	gnl|BL_ORD_ID|172460 sp|Q94CD1|HHT1_ARATH Omega-hydroxypalmitate O-feruloyl transferase OS=Arabidopsis thaliana OX=3702 GN=HHT1 PE=1 SV=1//2.45922e-32
MS.gene61441	-	15220:21567-28702	529	0	0.508289	0.211177	0.16803	0.16803	0.508289	0.211177	0	-9.91638	0.145463	-1.66246	8.39223	7.89944e-05	0.944112	0.244741	0.0125899	0.0266847	1	1	0.546592	gnl|BL_ORD_ID|54758 sp|Q38819|CCA23_ARATH Cyclin-A2-3 OS=Arabidopsis thaliana OX=3702 GN=CYCA2-3 PE=1 SV=2//1.22503e-69
MS.gene003303	MS.gene003303	chr2.4:59424129-59429876	1665	0	0.298212	0.0626125	0.260024	0.260024	0.298212	0.0626125	0	-9.43582	-2.29361	-0.00530072	7.14415	0.000158053	0.127412	1	0.0127957	0.0441097	1	1	0.553148	gnl|BL_ORD_ID|233873 sp|Q8VYJ1|MENE_ARATH 2-succinylbenzoate--CoA ligase, chloroplastic/peroxisomal OS=Arabidopsis thaliana OX=3702 GN=AAE14 PE=1 SV=1//0
MS.gene028653	MS.gene028653	chr2.1:7921258-7923610	879	0	1.66773	0.340693	0.278759	0.278759	1.66773	0.340693	0	-10.5912	0.0188122	-2.32875	8.28604	3.12543e-06	1	0.197774	0.0138204	0.0019548	1	1	0.578334	gnl|BL_ORD_ID|512112 sp|Q9SJL9|XTH32_ARATH Probable xyloglucan endotransglucosylase/hydrolase protein 32 OS=Arabidopsis thaliana OX=3702 GN=XTH32 PE=2 SV=1//5.14111e-141
MS.gene048884	-	chr4.2:5265366-5268743	228	0	1.13037	0.226958	0.321667	0.321667	1.13037	0.226958	0	-10.5009	-0.658361	-1.53599	8.27994	4.29589e-06	0.791028	0.398038	0.014017	0.00260825	1	1	0.583631	-//-
XLOC_204481	XLOC_204481	chr5.3:24735679-24740029	3192	0	4.91072	0.173262	2.54276	2.54276	4.91072	0.173262	0	-13.0479	-4.03828	-0.759431	8.24047	2.46661e-11	0.016511	0.449697	0.0145762	6.95184e-08	0.581459	1	0.596379	-
MS.gene039567	MS.gene039567	chr3.1:8798532-8824722	519	0	0.131192	0.0278745	0.060387	0.060387	0.131192	0.0278745	0	-10.4007	-1.30762	-0.880196	8.1999	6.04836e-06	0.590463	0.629405	0.0151639	0.00343777	1	1	0.609166	gnl|BL_ORD_ID|144333 sp|B9SQR9|GATB_RICCO Glutamyl-tRNA(Gln) amidotransferase subunit B, chloroplastic/mitochondrial OS=Ricinus communis OX=3988 GN=GATB PE=3 SV=1//5.12353e-68
MS.gene69140	MS.gene69140	chr3.3:92431344-92433447	660	0	0.789541	0.339969	0.362389	0.362389	0.789541	0.339969	0	-9.36132	-0.285903	-0.883138	8.17918	0.000133275	0.912953	0.637056	0.0156679	0.0388572	1	1	0.621534	gnl|BL_ORD_ID|172460 sp|Q94CD1|HHT1_ARATH Omega-hydroxypalmitate O-feruloyl transferase OS=Arabidopsis thaliana OX=3702 GN=HHT1 PE=1 SV=1//2.45922e-32
MS.gene002352	-	chr2.3:72175998-72178740	645	0	1.36086	0.347444	0.377532	0.377532	1.36086	0.347444	0	-10.0724	-0.381865	-1.68239	8.01826	2.09494e-05	0.877569	0.361675	0.0179086	0.00950797	1	1	0.669423	-//-
MS.gene022414	-	chr3.2:68002296-68003859	432	0	1.4667	0.496011	0.447933	0.447933	1.4667	0.496011	0	-9.75312	-0.299092	-1.51991	7.92913	8.87054e-05	0.911724	0.421364	0.0199738	0.028888	1	1	0.711849	gnl|BL_ORD_ID|489966 sp|Q9NX01|TXN4B_HUMAN Thioredoxin-like protein 4B OS=Homo sapiens OX=9606 GN=TXNL4B PE=1 SV=1//8.80515e-24
MS.gene071441	MS.gene071441	chr1.3:36548906-36552155	650	0	0.505374	0.18303	0.040833	0.040833	0.505374	0.18303	0	-9.33836	1.90679	-3.31548	7.90409	0.000160103	0.439232	0.0744588	0.0204303	0.0444104	1	1	0.718696	gnl|BL_ORD_ID|505137 sp|O81644|VILI2_ARATH Villin-2 OS=Arabidopsis thaliana OX=3702 GN=VLN2 PE=1 SV=2//1.74216e-15
XLOC_000886	XLOC_000886	11168:25-3948	967	0	0.614201	0.136793	0.202493	0.202493	0.614201	0.136793	0	-9.88098	-0.750463	-1.34094	7.77195	3.82882e-05	0.702451	0.3389	0.0232472	0.0153347	1	1	0.766678	-
MS.gene038011	-	chr1.1:50605606-50614390	571	0.0091245	1.11674	0.51868	0.640556	0.640556	1.11674	0.51868	0.0091245	-6.79231	-0.499866	-0.593955	5.72362	2.30146e-05	0.777614	0.575266	0.0234347	0.0102818	1	1	0.771085	-//-
MS.gene015290	-	chr5.4:8571561-8581549	1350	0.0014665	3.09294	0.0560345	0.0114265	0.0114265	3.09294	0.0560345	0.0014665	-10.2465	1.96958	-7.51848	4.657	2.82086e-05	0.22462	0.000307595	0.0237312	0.011992	1	0.0586411	0.77432	-//-
MS.gene88851	MS.gene88851	chr1.1:70032561-70034383	642	0	1.11239	0.291137	0.67011	0.67011	1.11239	0.291137	0	-9.66093	-1.40054	-0.504445	7.74401	6.05323e-05	0.455101	0.705667	0.0238401	0.0218653	1	1	0.774712	gnl|BL_ORD_ID|55174 sp|Q8RWM7|CCB3_ARATH Protein COFACTOR ASSEMBLY OF COMPLEX C SUBUNIT B CCB3, chloroplastic OS=Arabidopsis thaliana OX=3702 GN=CCB3 PE=1 SV=1//4.6065e-58
MS.gene002690	MS.gene002690	chr2.1:68253769-68259110	1377	0	0.380653	0.041178	0.0349375	0.0349375	0.380653	0.041178	0	-9.61442	0.0324888	-3.12126	6.50604	0.000166859	1	0.104444	0.0243631	0.0458388	1	1	0.784636	gnl|BL_ORD_ID|428362 sp|Q8VZU3|SCP19_ARATH Serine carboxypeptidase-like 19 OS=Arabidopsis thaliana OX=3702 GN=SCPL19 PE=1 SV=1//1.87472e-172
MS.gene052467	-	chr6.1:75831232-75835415	990	0	0.704897	0.195344	0.686764	0.686764	0.704897	0.195344	0	-9.36025	-2.23763	0.436232	7.56876	0.000131958	0.208888	0.733622	0.0276003	0.0385335	1	1	0.830901	gnl|BL_ORD_ID|295851 sp|P51850|PDC1_PEA Pyruvate decarboxylase 1 OS=Pisum sativum OX=3888 GN=PDC1 PE=2 SV=1//4.4381e-59
MS.gene96242	MS.gene96242	chr2.3:67335759-67342409	1494	0	0.245774	0.0665	0.052405	0.052405	0.245774	0.0665	0	-9.35005	0.0690146	-2.00317	7.43735	0.000149544	0.988008	0.283807	0.0314881	0.0423039	1	1	0.882521	gnl|BL_ORD_ID|82063 sp|Q8LGH4|CUL4_ARATH Cullin-4 OS=Arabidopsis thaliana OX=3702 GN=CUL4 PE=1 SV=1//0
MS.gene44340	MS.gene44340	chr5.1:24637551-24645941	854	0	0.86036	0.0510965	0.127571	0.127571	0.86036	0.0510965	0	-11.454	-1.57593	-2.48252	7.40957	1.54008e-07	0.516303	0.164444	0.0325694	0.000150894	1	1	0.8972	gnl|BL_ORD_ID|207659 sp|Q84JS6|KNAT6_ARATH Homeobox protein knotted-1-like 6 OS=Arabidopsis thaliana OX=3702 GN=KNAT6 PE=1 SV=1//1.51029e-109
MS.gene66498	MS.gene66498	10836:3011-8146	1765	0.039017	2.91373	1.62718	0.19049	0.19049	2.91373	1.62718	0.039017	-6.17209	2.80755	-3.70929	5.30843	7.63001e-05	0.258487	0.0317684	0.0328533	0.0261932	1	0.804437	0.89956	gnl|BL_ORD_ID|422216 sp|P08927|RUBB_PEA RuBisCO large subunit-binding protein subunit beta, chloroplastic OS=Pisum sativum OX=3888 PE=1 SV=2//0
MS.gene82361	MS.gene82361	chr4.2:26752960-26755835	1974	0	0.53503	0.137107	0.271881	0.271881	0.53503	0.137107	0	-9.25885	-1.16875	-0.750961	7.32079	0.000168921	0.530641	0.583472	0.0356593	0.046226	1	1	0.930393	gnl|BL_ORD_ID|312136 sp|Q9LMG7|PPA2_ARATH Probable inactive purple acid phosphatase 2 OS=Arabidopsis thaliana OX=3702 GN=PAP2 PE=2 SV=1//0
MS.gene29828	MS.gene29828	chr3.4:72890621-72899207	1329	0	0.680772	0.042786	0.07223	0.07223	0.680772	0.042786	0	-11.2256	-0.948738	-3.03457	7.24306	9.82107e-05	0.650796	0.111807	0.0382687	0.030976	1	1	0.964284	gnl|BL_ORD_ID|446484 sp|Q93Y91|STP5_ARATH Sugar transport protein 5 OS=Arabidopsis thaliana OX=3702 GN=STP5 PE=2 SV=1//3.27823e-10
MS.gene028050	MS.gene028050	chr5.3:16855598-16859177	966	0	1.178	0.0211985	0.015538	0.015538	1.178	0.0211985	0	-10.7522	0.295197	-5.94161	5.09974	5.02732e-05	0.942832	0.00379711	0.326225	0.0188764	1	0.281079	1	gnl|BL_ORD_ID|220402 sp|Q8H0W0|LPA3_ARATH Protein LOW PSII ACCUMULATION 3, chloroplastic OS=Arabidopsis thaliana OX=3702 GN=LPA3 PE=1 SV=1//2.22658e-06
MS.gene040080	-	chr6.3:46017306-46020459	816	0.0359195	2.85087	0.24818	0.236074	0.236074	2.85087	0.24818	0.0359195	-6.32257	-0.144929	-3.33871	2.78628	0.000134656	0.928019	0.00820038	0.129876	0.0391598	1	0.420709	1	gnl|BL_ORD_ID|13538 sp|P08688|ALB2_PEA Albumin-2 OS=Pisum sativum OX=3888 PE=2 SV=1//9.40847e-15
MS.gene010007	-	chr5.3:54317287-54323008	735	0.22594	6.63303	0.63951	0.263226	0.263226	6.63303	0.63951	0.22594	-4.89189	1.06341	-4.43521	1.50202	2.37748e-06	0.55696	0.0111608	0.209678	0.00156865	1	0.491204	1	-//-
MS.gene97968	MS.gene97968	chr8.4:33207879-33212619	711	0	0.545948	0.0308905	0.016512	0.016512	0.545948	0.0308905	0	-9.59115	0.5342	-4.67256	5.4682	8.48827e-05	0.901215	0.0125716	0.223213	0.0280269	1	0.520615	1	gnl|BL_ORD_ID|186616 sp|Q8VYP9|ICML1_ARATH Probable isoprenylcysteine alpha-carbonyl methylesterase ICMEL1 OS=Arabidopsis thaliana OX=3702 GN=ICMEL1 PE=2 SV=1//1.55242e-120
XLOC_131317	XLOC_131317	chr3.4:47201585-47205533	3318	0.174093	9.09169	0.03757	1.42896	1.42896	9.09169	0.03757	0.174093	-6.22689	-5.26208	-2.59778	-1.65597	3.36777e-06	0.00131006	0.0386459	0.353886	0.00209489	0.144705	0.874502	1	-
MS.gene42624	MS.gene42624	chr3.4:91893035-91895366	1017	0.133683	6.43637	0.230202	1.11328	1.11328	6.43637	0.230202	0.133683	-5.50693	-2.50137	-2.27478	0.729021	2.10319e-05	0.104941	0.0506628	0.661927	0.0095265	1	0.966647	1	gnl|BL_ORD_ID|6922 sp|Q9S7X6|ACL5_ARATH Thermospermine synthase ACAULIS5 OS=Arabidopsis thaliana OX=3702 GN=ACL5 PE=1 SV=1//4.58318e-180
MS.gene41188	MS.gene41188	chr4.1:36897903-36898533	246	0	3.18718	0.384256	0.190346	0.190346	3.18718	0.384256	0	-9.60622	0.777626	-3.6942	6.66113	0.000117242	0.778734	0.0508418	0.0720198	0.0352173	1	0.968034	1	-//-
MS.gene57986	MS.gene57986	chr8.3:9977191-9986162	1354	0.00059	4.10608	0.000889	1.56912	1.56912	4.10608	0.000889	0.00059	-11.5832	-10.4942	-1.22454	-0.109026	0.000147804	0.000393327	0.641197	1	0.0419155	0.0693353	1	1	gnl|BL_ORD_ID|140537 sp|Q8BID8|FXL14_MOUSE F-box/LRR-repeat protein 14 OS=Mus musculus OX=10090 GN=Fbxl14 PE=2 SV=1//1.9563e-08
MS.gene065540	MS.gene065540	chr5.1:74511417-74513705	1320	0.0600025	12.7693	0.0273215	6.46441	6.46441	12.7693	0.0273215	0.0600025	-7.61399	-7.93723	-0.765777	-1.1121	9.04027e-10	0.00341334	0.672382	0.599548	1.61234e-06	0.252613	1	1	gnl|BL_ORD_ID|148980 sp|Q8RWE8|GGAP1_ARATH GDP-L-galactose phosphorylase 1 OS=Arabidopsis thaliana OX=3702 GN=VTC2 PE=1 SV=1//0
MS.gene005803	MS.gene005803	chr1.1:66666963-66671126	2208	0	20.1761	0.0205185	2.79427	2.79427	20.1761	0.0205185	0	-15.0523	-7.28475	-2.67026	5.10053	4.99568e-14	0.00690291	0.164411	0.31648	2.92426e-10	0.371971	1	1	gnl|BL_ORD_ID|163436 sp|Q84WB7|GT645_ARATH Glycosyltransferase family protein 64 protein C5 OS=Arabidopsis thaliana OX=3702 GN=At5g04500 PE=2 SV=1//0
MS.gene061607	MS.gene061607	chr1.4:43122914-43127268	1587	0	4.68861	0.072979	9.20124	9.20124	4.68861	0.072979	0	-13.0284	-7.18942	1.13257	6.98916	0.000121451	0.0113135	0.671385	0.0486667	0.0361959	0.482088	1	1	gnl|BL_ORD_ID|58197 sp|Q42438|CDPK8_ARATH Calcium-dependent protein kinase 8 OS=Arabidopsis thaliana OX=3702 GN=CPK8 PE=1 SV=1//0
MS.gene58593	MS.gene58593	chr5.3:24741940-24744861	1722	0.0726395	7.31973	0.351197	4.3491	4.3491	7.31973	0.351197	0.0726395	-6.64042	-3.81642	-0.552885	2.27792	2.32896e-05	0.0237721	0.578224	0.329189	0.010364	0.695652	1	1	gnl|BL_ORD_ID|79166 sp|F4KIF3|CSA1_ARATH Disease resistance-like protein CSA1 OS=Arabidopsis thaliana OX=3702 GN=CSA1 PE=4 SV=1//2.61733e-21
MS.gene72902	MS.gene72902	chr5.1:18957275-18961765	1167	0.144895	6.54081	0.121524	4.59119	4.59119	6.54081	0.121524	0.144895	-5.4424	-5.48629	-0.229808	-0.294245	3.45256e-05	0.0395762	0.905599	0.888806	0.0140831	0.87495	1	1	gnl|BL_ORD_ID|318148 sp|Q8GYA6|PS13B_ARATH 26S proteasome non-ATPase regulatory subunit 13 homolog B OS=Arabidopsis thaliana OX=3702 GN=RPN9B PE=1 SV=1//0
MS.gene22643	MS.gene22643	chr3.4:49174119-49177672	732	0	0.995723	0.024161	0.260238	0.260238	0.995723	0.024161	0	-10.4469	-3.47189	-1.68169	5.29405	4.99894e-06	0.0528222	0.257203	0.163721	0.00294885	0.975739	1	1	gnl|BL_ORD_ID|458059 sp|Q946Y7|SYP61_ARATH Syntaxin-61 OS=Arabidopsis thaliana OX=3702 GN=SYP61 PE=1 SV=1//1.74821e-88
XLOC_024661	XLOC_024661	chr1.1:15537519-15551322	824	0.082268	2.45125	0.121861	1.51295	1.51295	2.45125	0.121861	0.082268	-5.10044	-4.02605	-0.331074	0.720683	4.52214e-05	0.0689423	0.855357	0.663887	0.0173348	1	1	1	-
MS.gene064041	MS.gene064041	42523:14988-17825	969	0	0.570266	0.108933	0.299323	0.299323	0.570266	0.108933	0	-9.3137	-1.68248	-0.681773	6.95109	0.000179513	0.492067	0.72037	0.0511518	0.0484981	1	1	1	gnl|BL_ORD_ID|70357 sp|F4JU70|COAC2_ARATH Mitochondrial carrier protein CoAc2 OS=Arabidopsis thaliana OX=3702 GN=COAC2 PE=2 SV=1//2.09537e-144
MS.gene01124	-	chr2.1:74452094-74455748	570	0	0.667148	0.0591565	0.51052	0.51052	0.667148	0.0591565	0	-9.52214	-3.2569	-0.172204	6.08134	8.67073e-05	0.0719712	0.903198	0.130304	0.0285221	1	1	1	gnl|BL_ORD_ID|471942 sp|Q94EH8|THO4C_ARATH THO complex subunit 4C OS=Arabidopsis thaliana OX=3702 GN=ALY3 PE=1 SV=1//2.02278e-18
MS.gene26752	MS.gene26752	chr8.3:5023071-5025997	1494	0	0.929214	0.0174025	0.053933	0.053933	0.929214	0.0174025	0	-10.1207	-1.76682	-3.90734	4.4443	0.000150232	0.527396	0.0560504	0.489359	0.0424399	1	1	1	gnl|BL_ORD_ID|29457 sp|Q42456|ASPR1_ORYSJ Aspartic proteinase oryzasin-1 OS=Oryza sativa subsp. japonica OX=39947 GN=Os05g0567100 PE=2 SV=2//0
MS.gene030085	MS.gene030085	chr5.2:77885758-77891980	3144	0	1.17959	0.05075	0.859375	0.859375	1.17959	0.05075	0	-11.5384	-4.21588	-0.277773	7.02826	4.8063e-07	0.0964551	0.882762	0.0473888	0.000414047	1	1	1	gnl|BL_ORD_ID|310623 sp|F4I6M1|POLIA_ARATH DNA polymerase I A, chloroplastic/mitochondrial OS=Arabidopsis thaliana OX=3702 GN=POLIA PE=2 SV=1//0
MS.gene026371	MS.gene026371	chr1.1:19338771-19342408	1173	0	0.514786	#N/A	#N/A	0	0.514786	#N/A	#N/A	-9.50648	#N/A	-9.44228	#N/A	0.000180422	#N/A	0.000288326	#N/A	0.048686	#N/A	0.0560119	#N/A	gnl|BL_ORD_ID|47465 sp|O22806|BUBR1_ARATH Mitotic spindle checkpoint protein BUBR1 OS=Arabidopsis thaliana OX=3702 GN=BUBR1 PE=1 SV=2//3.36162e-149
MS.gene050117	MS.gene050117	chr4.4:17171936-17180216	1751	0	3.59	0	0.0278235	0.0278235	3.59	#N/A	#N/A	-13.4627	-6.72601	-6.6803	#N/A	9.04183e-05	0.069531	0.0157825	#N/A	0.0292787	1	0.584627	#N/A	gnl|BL_ORD_ID|453388 sp|Q9SGE9|SYFB_ARATH Phenylalanine--tRNA ligase beta subunit, cytoplasmic OS=Arabidopsis thaliana OX=3702 GN=At1g72550 PE=2 SV=1//0
MS.gene045322	MS.gene045322	chr3.4:79330429-79336708	3654	0	0.911072	0	0.0508325	0.0508325	0.911072	#N/A	#N/A	-11.1423	-7.18115	-3.9166	#N/A	3.41879e-07	0.0443457	0.0254094	#N/A	0.000308487	0.911191	0.729968	#N/A	gnl|BL_ORD_ID|207545 sp|Q8L7Y8|KN12B_ARATH Kinesin-like protein KIN-12B OS=Arabidopsis thaliana OX=3702 GN=KIN12B PE=1 SV=1//0
MS.gene20737	MS.gene20737	chr1.2:66207675-66211903	1293	0	21.4015	0	2.25856	2.25856	21.4015	#N/A	#N/A	-15.1431	-12.0663	-3.03869	#N/A	6.41371e-17	0.000310682	0.102021	#N/A	1.62687e-12	0.0595594	1	#N/A	gnl|BL_ORD_ID|501427 sp|Q9LZI2|UXS2_ARATH UDP-glucuronic acid decarboxylase 2 OS=Arabidopsis thaliana OX=3702 GN=UXS2 PE=1 SV=1//0
MS.gene06350	MS.gene06350	chr3.1:77353389-77361116	1119	0	2.94278	0	0.878712	0.878712	2.94278	#N/A	#N/A	-13.076	-11.557	-1.44908	#N/A	0.000118184	0.000572427	0.572705	#N/A	0.0354069	0.0880677	1	#N/A	gnl|BL_ORD_ID|58006 sp|Q336M2|CDKE1_ORYSJ Cyclin-dependent kinase E-1 OS=Oryza sativa subsp. japonica OX=39947 GN=CDKE-1 PE=2 SV=2//0
MS.gene21119	MS.gene21119	10913:80378-83749	1239	0	0.693138	0	0.309536	0.309536	0.693138	#N/A	#N/A	-9.81444	-8.86875	-0.881911	#N/A	0.000137622	0.000640188	0.553863	#N/A	0.0397188	0.0944675	1	#N/A	gnl|BL_ORD_ID|290754 sp|F4I839|PAE2_ARATH Pectin acetylesterase 2 OS=Arabidopsis thaliana OX=3702 GN=PAE2 PE=2 SV=1//0
XLOC_133861	XLOC_133861	chr3.4:88900575-88904496	3592	0	1.67047	0	1.4505	1.4505	1.67047	#N/A	#N/A	-11.1229	-11.0014	-0.0651814	#N/A	3.73666e-07	0.00102632	0.973109	#N/A	0.000328092	0.126047	1	#N/A	-
MS.gene021176	-	chr4.1:35956594-35959660	636	0	2.8859	0	1.24683	1.24683	2.8859	#N/A	#N/A	-11.7826	-10.7305	-0.998167	#N/A	2.01617e-08	0.00136462	0.577042	#N/A	2.52896e-05	0.147939	1	#N/A	-//-
MS.gene63146	MS.gene63146	chr8.1:43700980-43704178	2229	0	2.33309	0	1.07258	1.07258	2.33309	#N/A	#N/A	-11.5124	-10.5732	-0.879481	#N/A	6.89229e-08	0.00160911	0.623221	#N/A	7.3183e-05	0.163063	1	#N/A	-//-
MS.gene57254	MS.gene57254	chr1.4:6230534-6234116	1122	0	0.448562	0	0.566525	0.566525	0.448562	#N/A	#N/A	-9.33346	-9.8171	0.537624	#N/A	0.000155943	0.00351657	0.778642	#N/A	0.0436811	0.257004	1	#N/A	-//-
MS.gene40954	MS.gene40954	chr3.2:81090853-81102282	2040	0	0.287976	0	0.168733	0.168733	0.287976	#N/A	#N/A	-10.354	-9.76346	-0.549059	#N/A	7.34953e-06	0.00356282	0.764371	#N/A	0.0040527	0.258973	1	#N/A	gnl|BL_ORD_ID|164742 sp|A5B4D2|GUFP_VITVI Translation factor GUF1 homolog, chloroplastic OS=Vitis vinifera OX=29760 GN=VITISV_013255 PE=3 SV=1//0
MS.gene035360	MS.gene035360	chr8.4:11818402-11824780	2072	0	1.68287	0	0.311858	0.311858	1.68287	#N/A	#N/A	-12.0367	-9.78643	-2.19093	#N/A	4.27036e-09	0.00363135	0.213315	#N/A	6.41366e-06	0.261469	1	#N/A	gnl|BL_ORD_ID|236832 sp|Q39659|MFPA_CUCSA Glyoxysomal fatty acid beta-oxidation multifunctional protein MFP-a OS=Cucumis sativus OX=3659 PE=1 SV=1//0
MS.gene53381	MS.gene53381	chr4.1:13034816-13036320	963	0	1.13102	0	1.08468	1.08468	1.13102	#N/A	#N/A	-9.39399	-9.50493	0.169407	#N/A	0.000124323	0.0047815	0.931448	#N/A	0.0367971	0.304992	1	#N/A	gnl|BL_ORD_ID|355010 sp|Q9FXF2|RKF1_ARATH Probable LRR receptor-like serine/threonine-protein kinase RFK1 OS=Arabidopsis thaliana OX=3702 GN=RKF1 PE=1 SV=1//7.53128e-124
MS.gene056041	MS.gene056041	chr1.1:61376457-61380131	2337	0	1.92267	0	0.424034	0.424034	1.92267	#N/A	#N/A	-11.4328	-9.43744	-1.93572	#N/A	1.05504e-07	0.00511842	0.277478	#N/A	0.000106573	0.315242	1	#N/A	gnl|BL_ORD_ID|207595 sp|F4K4C5|KN14S_ARATH Kinesin-like protein KIN-14S OS=Arabidopsis thaliana OX=3702 GN=KIN14S PE=3 SV=1//0
MS.gene35336	MS.gene35336	chr2.3:13444505-13448486	1479	0	1.07678	0	0.351534	0.351534	1.07678	#N/A	#N/A	-10.7314	-9.28122	-1.39484	#N/A	1.81399e-06	0.00602991	0.439727	#N/A	0.00126155	0.346153	1	#N/A	gnl|BL_ORD_ID|29419 sp|Q9S9K4|ASPL2_ARATH Aspartic proteinase-like protein 2 OS=Arabidopsis thaliana OX=3702 GN=At1g65240 PE=1 SV=2//1.21593e-86
MS.gene005811	MS.gene005811	chr1.1:66902637-66904334	606	0	2.12213	0	0.713549	0.713549	2.12213	#N/A	#N/A	-10.4575	-9.09382	-1.31633	#N/A	6.25667e-06	0.00690637	0.47026	#N/A	0.00352348	0.371978	1	#N/A	gnl|BL_ORD_ID|208159 sp|Q2RAK2|KPYC1_ORYSJ Pyruvate kinase 1, cytosolic OS=Oryza sativa subsp. japonica OX=39947 GN=Os11g0148500 PE=1 SV=1//1.54605e-119
MS.gene033923	MS.gene033923	chr2.2:39446872-39448867	1182	0	4.51974	0	0.421803	0.421803	4.51974	#N/A	#N/A	-11.7776	-8.57237	-3.15707	#N/A	2.8087e-08	0.0116847	0.0728409	#N/A	3.33955e-05	0.489382	1	#N/A	gnl|BL_ORD_ID|130360 sp|Q9FZ70|FDL1_ARATH F-box/FBD/LRR-repeat protein At1g13570 OS=Arabidopsis thaliana OX=3702 GN=At1g13570 PE=2 SV=1//1.6917e-65
MS.gene052507	MS.gene052507	chr4.3:23734634-23736866	936	0	1.74914	0	0.37464	0.37464	1.74914	#N/A	#N/A	-10.5836	-8.55574	-1.98324	#N/A	3.11462e-06	0.0118623	0.268894	#N/A	0.00195447	0.493398	1	#N/A	gnl|BL_ORD_ID|120406 sp|I6YGS0|EPHA_MYCTU Epoxide hydrolase A OS=Mycobacterium tuberculosis (strain ATCC 25618 / H37Rv) OX=83332 GN=ephA PE=1 SV=1//7.50021e-35
MS.gene033739	MS.gene033739	chr7.4:22574398-22575761	1092	0	1.6992	0	0.499265	0.499265	1.6992	#N/A	#N/A	-9.86302	-8.25982	-1.56388	#N/A	4.00473e-05	0.0159472	0.396463	#N/A	0.0158303	0.571665	1	#N/A	gnl|BL_ORD_ID|428138 sp|Q6GQS1|SCMC3_MOUSE Calcium-binding mitochondrial carrier protein SCaMC-3 OS=Mus musculus OX=10090 GN=Slc25a23 PE=1 SV=1//6.28229e-95
MS.gene031799	MS.gene031799	chr4.3:31671978-31681699	2283	0	1.97853	0	0.059563	0.059563	1.97853	#N/A	#N/A	-12.835	-8.03171	-4.73325	#N/A	0.00015096	0.0204549	0.0748039	#N/A	0.0425464	0.645815	1	#N/A	gnl|BL_ORD_ID|455317 sp|F4JLM5|SYIC_ARATH Isoleucine--tRNA ligase, cytoplasmic OS=Arabidopsis thaliana OX=3702 GN=At4g10320 PE=2 SV=1//0
MS.gene036538	MS.gene036538	chr8.4:12708253-12711459	1599	0	1.0197	0	0.17465	0.17465	1.0197	#N/A	#N/A	-10.3029	-7.98968	-2.26118	#N/A	2.7084e-05	0.0206614	0.228185	#N/A	0.0116003	0.647921	1	#N/A	gnl|BL_ORD_ID|269610 sp|Q56XP4|NHX2_ARATH Sodium/hydrogen exchanger 2 OS=Arabidopsis thaliana OX=3702 GN=NHX2 PE=2 SV=2//0
MS.gene025584	MS.gene025584	chr4.4:65244244-65246625	1389	0	0.986302	0	0.144284	0.144284	0.986302	#N/A	#N/A	-9.85523	-7.30572	-2.50438	#N/A	3.25688e-05	0.0392023	0.171655	#N/A	0.0135121	0.871135	1	#N/A	gnl|BL_ORD_ID|130360 sp|Q9FZ70|FDL1_ARATH F-box/FBD/LRR-repeat protein At1g13570 OS=Arabidopsis thaliana OX=3702 GN=At1g13570 PE=2 SV=1//4.04605e-83
MS.gene62698	MS.gene62698	chr6.3:7943344-7946248	1407	0	0.621146	0	0.050104	0.050104	0.621146	#N/A	#N/A	-9.48503	-6.05698	-3.38216	#N/A	9.69656e-05	0.139287	0.0648806	#N/A	0.0307021	1	1	#N/A	gnl|BL_ORD_ID|193472 sp|Q9SSV4|INO1_NICPA Inositol-3-phosphate synthase OS=Nicotiana paniculata OX=62141 GN=INPS1 PE=2 SV=1//0
MS.gene004690	MS.gene004690	chr1.1:54796075-54815265	4695	0.024667	0.121671	1.1403	0.002997	0.002997	0.121671	1.1403	0.024667	-2.25307	8.11678	-4.89525	5.45766	0.104675	0.000163605	0.00921749	0.00115653	1	0.0382727	0.448424	0.133202	gnl|BL_ORD_ID|183930 sp|F4IZM8|HUAL3_ARATH Protein HUA2-LIKE 3 OS=Arabidopsis thaliana OX=3702 GN=HULK3 PE=2 SV=1//2.22239e-65
MS.gene09167	MS.gene09167	chr4.3:43575874-43578253	915	13.5665	23.8204	74.3511	3.76555	3.76555	23.8204	74.3511	13.5665	-0.807625	4.05899	-2.38982	2.45743	0.383091	6.44154e-05	0.0303836	0.00221695	1	0.0200366	0.7911	0.201285	gnl|BL_ORD_ID|512112 sp|Q9SJL9|XTH32_ARATH Probable xyloglucan endotransglucosylase/hydrolase protein 32 OS=Arabidopsis thaliana OX=3702 GN=XTH32 PE=2 SV=1//3.35599e-141
MS.gene58706	MS.gene58706	chr2.3:53047725-53074883	1893	0.0072235	0	0.192752	0	#N/A	#N/A	0.192752	0.0072235	6.27099	10.9605	#N/A	4.69864	0.104647	5.41554e-07	#N/A	0.00337659	1	0.000417715	#N/A	0.260531	-//-
MS.gene45575	-	23426:29379-34763	1608	0.0071585	0	0.280253	0	#N/A	#N/A	0.280253	0.0071585	4.22025	9.16927	#N/A	4.90705	0.515319	0.000171898	#N/A	0.00344231	1	0.0395629	#N/A	0.264033	-//-
MS.gene22868	MS.gene22868	chr7.4:1884073-1887154	672	0.0988905	0.0551875	3.22804	0	0	0.0551875	3.22804	0.0988905	0.874154	11.8475	-6.03129	4.92005	0.697935	1.72829e-05	0.16016	0.00382969	1	0.00761759	1	0.282884	gnl|BL_ORD_ID|510017 sp|Q8VYF7|WHY2_ARATH Single-stranded DNA-binding protein WHY2, mitochondrial OS=Arabidopsis thaliana OX=3702 GN=WHY2 PE=1 SV=1//2.07693e-81
MS.gene009058	MS.gene009058	chr8.2:36511212-36512842	237	0.030352	0.269317	1.05437	0	0	0.269317	1.05437	0.030352	-2.92796	9.34224	-7.37233	4.85179	0.145567	0.000179815	0.0136118	0.00521236	1	0.0408366	0.54389	0.338538	-//-
MS.gene70394	MS.gene70394	chr4.3:20018671-20023569	1146	0.0332645	0.41377	0.687686	0	0	0.41377	0.687686	0.0332645	-3.62253	10.3204	-9.65414	4.26704	0.0705143	6.2976e-06	0.000720108	0.00892865	1	0.0033594	0.105459	0.45532	gnl|BL_ORD_ID|493850 sp|P25874|UCP1_HUMAN Mitochondrial brown fat uncoupling protein 1 OS=Homo sapiens OX=9606 GN=UCP1 PE=1 SV=3//1.34901e-06
MS.gene069358	MS.gene069358	chr7.1:87707158-87709484	1029	0.037543	0	0.950305	0	#N/A	#N/A	0.950305	0.037543	5.14693	9.70449	#N/A	4.65281	0.340653	6.94965e-05	#N/A	0.00979897	1	0.0212909	#N/A	0.479777	gnl|BL_ORD_ID|326064 sp|Q9LYR6|PTR49_ARATH Protein NRT1/ PTR FAMILY 6.1 OS=Arabidopsis thaliana OX=3702 GN=NPF6.1 PE=2 SV=1//0
MS.gene56210	MS.gene56210	chr3.3:3987351-3989978	951	0.030963	0	0.880274	0	#N/A	#N/A	0.880274	0.030963	5.14685	9.81524	#N/A	4.73521	0.339908	0.000155796	#N/A	0.0135953	1	0.0370523	#N/A	0.572191	gnl|BL_ORD_ID|116159 sp|Q15GI4|EGS1_OCIBA Eugenol synthase 1 OS=Ocimum basilicum OX=39350 GN=EGS1 PE=1 SV=1//7.95665e-124
MS.gene007727	MS.gene007727	chr4.4:45816927-45819227	756	11.8035	16.1125	47.3849	2.72244	2.72244	16.1125	47.3849	11.8035	-0.457732	3.86712	-2.30342	2.00816	0.616426	0.000169395	0.0291184	0.0204615	1	0.0393438	0.774746	0.71922	gnl|BL_ORD_ID|512111 sp|P93046|XTH31_ARATH Xyloglucan endotransglucosylase/hydrolase protein 31 OS=Arabidopsis thaliana OX=3702 GN=XTH31 PE=1 SV=2//6.11852e-83
MS.gene052310	MS.gene052310	chr4.4:34075782-34082772	1269	0.0383745	0.085625	0.520806	0	0	0.085625	0.520806	0.0383745	-1.25307	10.4292	-7.91732	3.74266	0.604093	4.39061e-06	0.0283246	0.0223086	1	0.00249361	0.764046	0.751809	-//-
MS.gene81487	-	chr6.4:20868230-20872713	597	0.228349	0.610472	2.1003	0.0028985	0.0028985	0.610472	2.1003	0.228349	-1.25519	8.6212	-6.59765	3.24905	0.40619	4.63512e-06	0.00134086	0.0226357	1	0.00259377	0.153194	0.757214	gnl|BL_ORD_ID|340973 sp|Q9SLZ4|RBR1_PEA Retinoblastoma-related protein 1 OS=Pisum sativum OX=3888 GN=RBR1 PE=2 SV=1//7.02777e-30
MS.gene62950	MS.gene62950	chr3.3:59454380-59457980	1635	0.0632925	0.216223	1.05121	0	0	0.216223	1.05121	0.0632925	-1.74923	10.4652	-8.20333	3.9913	0.349337	2.57465e-05	0.00265106	0.0255959	1	0.0102947	0.228208	0.805072	gnl|BL_ORD_ID|298372 sp|Q9SGY7|PEK11_ARATH Putative proline-rich receptor-like protein kinase PERK11 OS=Arabidopsis thaliana OX=3702 GN=PERK11 PE=2 SV=2//3.51193e-61
MS.gene024124	MS.gene024124	chr7.1:23602567-23605687	1467	0.12733	0.247878	1.75084	0	0	0.247878	1.75084	0.12733	-0.933311	10.9982	-8.14792	3.74915	0.702468	2.08397e-06	0.0230492	0.0284602	1	0.00134028	0.697123	0.845027	gnl|BL_ORD_ID|31672 sp|A2Q1V6|ATG4_MEDTR Cysteine protease ATG4 OS=Medicago truncatula OX=3880 GN=ATG4 PE=3 SV=1//0
MS.gene59557	MS.gene59557	chr8.4:68471406-68475319	1806	0.038807	0	0.550528	0	#N/A	#N/A	0.550528	0.038807	6.0095	9.70066	#N/A	3.73977	0.155464	6.05644e-05	#N/A	0.0341916	1	0.0193936	#N/A	0.915783	gnl|BL_ORD_ID|69274 sp|Q9LD40|CNG13_ARATH Putative cyclic nucleotide-gated ion channel 13 OS=Arabidopsis thaliana OX=3702 GN=CNGC13 PE=3 SV=2//0
MS.gene47426	MS.gene47426	chr1.4:51607870-51614117	1365	0.746758	0.145085	2.75975	0.0916415	0.0916415	0.145085	2.75975	0.746758	2.28102	4.65304	-0.472308	1.88937	0.083309	3.22377e-05	0.759928	0.034633	1	0.0123495	1	0.922304	gnl|BL_ORD_ID|153037 sp|Q86B00|GLNA1_DICDI Type-1 glutamine synthetase 1 OS=Dictyostelium discoideum OX=44689 GN=glnA1 PE=3 SV=1//1.98434e-59
MS.gene86216	MS.gene86216	chr5.1:23565339-23572138	1764	0.0805725	0.035358	0.659388	0	0	0.035358	0.659388	0.0805725	1.0905	10.7091	-6.61487	3.00634	0.569579	1.61812e-05	0.0922441	0.0353903	1	0.0072156	1	0.930178	gnl|BL_ORD_ID|3932 sp|Q8RY46|AB26B_ARATH ABC transporter B family member 26, chloroplastic OS=Arabidopsis thaliana OX=3702 GN=ABCB26 PE=1 SV=1//0
MS.gene90893	MS.gene90893	chr1.2:86582725-86588030	1554	2.79828	2.62667	0.980021	0	0	2.62667	0.980021	2.79828	0.0218451	10.9457	-12.4343	-1.52208	0.990892	6.70518e-07	0.000305097	0.144093	1	0.000506914	0.0584125	1	gnl|BL_ORD_ID|519282 sp|A1K5T6|Y1574_AZOSB UPF0061 protein azo1574 OS=Azoarcus sp. (strain BH72) OX=62928 GN=azo1574 PE=3 SV=1//3.38968e-159
MS.gene35713	MS.gene35713	chr2.1:14014780-14019443	1965	0.435433	0.407982	0.661416	0	0	0.407982	0.661416	0.435433	0.0882404	10.2118	-9.45692	0.633385	0.966565	9.71899e-06	0.000315438	0.709669	1	0.00473128	0.0597315	1	gnl|BL_ORD_ID|69221 sp|Q564K3|CND2_ARATH Condensin complex subunit 2 OS=Arabidopsis thaliana OX=3702 GN=CAPH PE=1 SV=1//0
MS.gene26309	MS.gene26309	37906:11296-16893	702	1.82722	2.43206	2.86544	0	0	2.43206	2.86544	1.82722	-0.51157	12.6156	-12.4001	0.70334	0.834558	0.000195636	0.000316143	0.772249	1	0.0435388	0.0598145	1	gnl|BL_ORD_ID|422190 sp|Q8H1S6|RU2B2_ARATH U2 small nuclear ribonucleoprotein B&apos;&apos; 2 OS=Arabidopsis thaliana OX=3702 GN=At1g06960 PE=1 SV=1//8.57536e-117
MS.gene072220	MS.gene072220	chr8.1:82855695-82859941	2013	3.6491	3.462	3.85858	0	0	3.462	3.85858	3.6491	0.0846445	12.633	-12.3775	0.126954	0.973007	2.47815e-09	0.000323297	0.943029	1	3.69801e-06	0.060861	1	gnl|BL_ORD_ID|290769 sp|F4HQA1|PAF1_ARATH Protein PAF1 homolog OS=Arabidopsis thaliana OX=3702 GN=VIP2 PE=1 SV=1//5.70399e-164
MS.gene073328	MS.gene073328	chr8.1:5825896-5833521	1172	1.65572	1.75223	1.99075	0	0	1.75223	1.99075	1.65572	-0.145471	12.5361	-12.373	0.27635	0.954199	0.000213511	0.00032517	0.912137	1	0.0464704	0.0611624	1	gnl|BL_ORD_ID|487911 sp|Q8W4P9|TT9_ARATH Protein TRANSPARENT TESTA 9 OS=Arabidopsis thaliana OX=3702 GN=TT9 PE=2 SV=1//3.09532e-141
MS.gene001665	MS.gene001665	chr8.4:3945511-3950214	3057	1.22806	3.07239	4.84558	0	0	3.07239	4.84558	1.22806	-1.27748	13.0718	-12.353	1.95852	0.609345	5.09689e-12	0.000331232	0.248957	1	1.87691e-08	0.0619964	1	gnl|BL_ORD_ID|59367 sp|Q9SWW6|CESA7_ARATH Cellulose synthase A catalytic subunit 7 [UDP-forming] OS=Arabidopsis thaliana OX=3702 GN=CESA7 PE=1 SV=1//0
MS.gene56748	MS.gene56748	chr6.2:4719629-4734785	3579	0.098256	0.0994875	0.093372	0	0	0.0994875	0.093372	0.098256	-0.0285354	9.07531	-9.15692	-0.0784493	0.993677	0.000217549	0.000331881	0.952014	1	0.0472141	0.0620615	1	gnl|BL_ORD_ID|3866 sp|Q9LHD1|AB15B_ARATH ABC transporter B family member 15 OS=Arabidopsis thaliana OX=3702 GN=ABCB15 PE=3 SV=1//7.11241e-79
MS.gene26401	MS.gene26401	chr4.1:22119623-22120656	629	37.0726	13.8837	23.1378	0	0	13.8837	23.1378	37.0726	1.43743	13.155	-12.3421	-0.663124	0.41924	2.16384e-12	0.000335114	0.422176	1	9.14877e-09	0.0625621	1	gnl|BL_ORD_ID|185945 sp|Q29U70|I4OMT_MEDTR Isoflavone 4&apos;-O-methyltransferase OS=Medicago truncatula OX=3880 GN=HI4&apos;OMT PE=1 SV=1//1.32506e-121
MS.gene067121	MS.gene067121	chr2.4:41882493-41884802	993	0.150136	0.637118	0.715468	0	0	0.637118	0.715468	0.150136	-2.09203	9.30706	-9.11997	2.25409	0.244429	0.000116067	0.000385285	0.183141	1	0.0300791	0.0692526	1	gnl|BL_ORD_ID|110210 sp|Q9M069|E137_ARATH Glucan endo-1,3-beta-glucosidase 7 OS=Arabidopsis thaliana OX=3702 GN=At4g34480 PE=1 SV=2//3.6219e-20
MS.gene05491	MS.gene05491	chr6.2:84065089-84066513	576	22.3623	9.06489	29.0655	0	0	9.06489	29.0655	22.3623	1.31061	13.9423	-12.1903	0.407665	0.604831	1.90327e-14	0.000394268	0.816254	1	1.81059e-10	0.0703366	1	gnl|BL_ORD_ID|414868 sp|Q9C514|RS71_ARATH 40S ribosomal protein S7-1 OS=Arabidopsis thaliana OX=3702 GN=RPS7A PE=2 SV=1//1.53709e-113
MS.gene046564	MS.gene046564	11355:27101-27760	660	10.4094	10.6809	15.1949	0.293222	0.293222	10.6809	15.1949	10.4094	-0.0738232	5.35422	-4.86843	0.547847	0.941852	4.36334e-05	0.000433166	0.564547	1	0.015469	0.0748611	1	-//-
MS.gene064817	MS.gene064817	chr3.4:98488769-98491724	534	0.259806	0.641818	0.716708	0	0	0.641818	0.716708	0.259806	-1.34942	9.63118	-9.54701	1.4283	0.37074	0.000177188	0.000439172	0.316941	1	0.0403735	0.0753086	1	gnl|BL_ORD_ID|14026 sp|Q5I0K7|ALG13_RAT UDP-N-acetylglucosamine transferase subunit ALG13 homolog OS=Rattus norvegicus OX=10116 GN=Alg13 PE=1 SV=1//2.45031e-33
MS.gene052946	MS.gene052946	chr4.1:83512075-83522269	3351	1.68652	1.02665	3.7513	0	0	1.02665	3.7513	1.68652	0.650197	13.8203	-12.0218	1.13482	0.755712	6.25574e-14	0.000467179	0.404811	1	4.76089e-10	0.0786062	1	-//-
MS.gene062154	MS.gene062154	chr1.3:30499266-30506170	2614	3.05862	1.62207	2.3629	0	0	1.62207	2.3629	3.05862	0.939746	12.5996	-11.9853	-0.363168	0.5904	1.01928e-10	0.000486548	0.662004	1	2.32714e-07	0.0803037	1	gnl|BL_ORD_ID|493357 sp|Q9ZSB5|UBP10_ARATH Ubiquitin carboxyl-terminal hydrolase 10 OS=Arabidopsis thaliana OX=3702 GN=UBP10 PE=2 SV=2//0
MS.gene25681	MS.gene25681	51713:192-3480	690	3.11803	2.98215	4.42624	0	0	2.98215	4.42624	3.11803	-0.000994265	12.4761	-11.9278	0.517094	1	0.0002284	0.000516338	0.835268	1	0.0487458	0.0838972	1	gnl|BL_ORD_ID|46672 sp|Q8LFS6|BRN1L_ARATH RNA-binding protein BRN1 OS=Arabidopsis thaliana OX=3702 GN=BRN1 PE=2 SV=1//2.79566e-120
MS.gene44064	MS.gene44064	chr1.3:57998906-58004671	867	0.999733	0.228958	0.635938	0	0	0.228958	0.635938	0.999733	2.07679	10.4663	-9.00598	-0.645493	0.0910344	5.54289e-06	0.000547254	0.557075	1	0.00300597	0.0874958	1	gnl|BL_ORD_ID|385913 sp|Q3T142|RM45_BOVIN 39S ribosomal protein L45, mitochondrial OS=Bos taurus OX=9913 GN=MRPL45 PE=2 SV=1//2.40457e-08
MS.gene007250	-	chr7.4:7427887-7437236	1059	1.08801	0.356469	1.07432	0	0	0.356469	1.07432	1.08801	1.62887	11.6615	-10.2454	-0.248405	0.267229	2.4907e-08	0.00067078	0.780682	1	2.85759e-05	0.100896	1	gnl|BL_ORD_ID|129393 sp|Q8S8F2|FBL11_ARATH BTB/POZ domain-containing protein FBL11 OS=Arabidopsis thaliana OX=3702 GN=FBL11 PE=2 SV=2//5.97234e-110
MS.gene76639	MS.gene76639	chr4.1:72657700-72663153	816	0.239544	0.212697	0.270913	0	0	0.212697	0.270913	0.239544	0.149606	9.16061	-8.79949	0.177858	0.937608	0.000190848	0.000702025	0.923714	1	0.042701	0.104095	1	gnl|BL_ORD_ID|435931 sp|Q9LZZ7|SKA1_ARATH Spindle and kinetochore-associated protein 1 homolog OS=Arabidopsis thaliana OX=3702 GN=At3g60660 PE=2 SV=1//1.71283e-117
MS.gene72127	MS.gene72127	chr4.2:6330509-6331907	864	2.24111	6.12381	8.88583	0	0	6.12381	8.88583	2.24111	-1.40417	12.2051	-11.5977	1.97113	0.571576	1.2639e-09	0.00074422	0.239042	1	2.06118e-06	0.10732	1	gnl|BL_ORD_ID|305455 sp|Q7XSQ9|PIP12_ORYSJ Probable aquaporin PIP1-2 OS=Oryza sativa subsp. japonica OX=39947 GN=PIP1-2 PE=2 SV=3//4.24255e-177
MS.gene55875	MS.gene55875	chr4.3:3614372-3622820	1770	1.96435	1.00727	2.46405	0	0	1.00727	2.46405	1.96435	0.992626	12.9487	-11.5893	0.329326	0.567454	6.84222e-12	0.000749358	0.694185	1	2.32234e-08	0.107923	1	gnl|BL_ORD_ID|205226 sp|Q9ZUN3|KEA4_ARATH K(+) efflux antiporter 4 OS=Arabidopsis thaliana OX=3702 GN=KEA4 PE=2 SV=2//0
MS.gene38234	MS.gene38234	chr5.3:78365759-78375280	1422	1.22186	0.797195	2.77875	0	0	0.797195	2.77875	1.22186	0.515727	13.3106	-11.5583	1.22273	0.832085	2.63869e-12	0.000774559	0.472763	1	1.09536e-08	0.109934	1	gnl|BL_ORD_ID|118888 sp|Q9ZW34|ENO3_ARATH Cytosolic enolase 3 OS=Arabidopsis thaliana OX=3702 GN=ENO3 PE=1 SV=1//0
XLOC_251698	XLOC_251698	chr6.4:56996038-57007012	10135	0.708346	0.748882	2.17242	0	0	0.748882	2.17242	0.708346	-0.0362138	13.1879	-11.5399	1.6266	0.987491	0.000113844	0.000790753	0.47157	1	0.0297733	0.111625	1	-
MS.gene49652	MS.gene49652	chr5.1:27969213-27972138	366	1.47267	2.44241	0.818145	0	0	2.44241	0.818145	1.47267	-0.791887	9.82515	-11.4715	-0.864753	0.748575	3.93625e-05	0.000849982	0.633958	1	0.0143105	0.117021	1	gnl|BL_ORD_ID|132876 sp|Q8LGG0|FKB12_ARATH Peptidyl-prolyl cis-trans isomerase FKBP12 OS=Arabidopsis thaliana OX=3702 GN=FKBP12 PE=1 SV=2//4.24905e-20
MS.gene54560	MS.gene54560	chr4.3:37215231-37222952	1935	0.415805	0.998348	0.999244	0	0	0.998348	0.999244	0.415805	-1.21937	11.5234	-11.4469	1.2535	0.622512	5.05217e-08	0.000875611	0.460211	1	5.26701e-05	0.119598	1	gnl|BL_ORD_ID|146293 sp|Q9LX30|GCN2_ARATH eIF-2-alpha kinase GCN2 OS=Arabidopsis thaliana OX=3702 GN=GCN2 PE=2 SV=2//0
MS.gene068777	MS.gene068777	chr2.3:18192296-18196928	543	0.236064	0.324736	0.688127	0	0	0.324736	0.688127	0.236064	-0.447391	10.2528	-9.10921	1.55522	0.776323	7.71784e-06	0.00089413	0.243558	1	0.00392545	0.120985	1	-//-
MS.gene034975	MS.gene034975	chr1.3:44753915-44759600	1620	0.733227	0.188193	0.529431	0	0	0.188193	0.529431	0.733227	1.9134	10.1677	-8.69197	-0.460105	0.113063	9.58359e-06	0.000962804	0.660016	1	0.00467534	0.12627	1	gnl|BL_ORD_ID|224770 sp|Q6TBX7|LUT1_ARATH Carotene epsilon-monooxygenase, chloroplastic OS=Arabidopsis thaliana OX=3702 GN=CYP97C1 PE=1 SV=1//0
MS.gene01618	MS.gene01618	chr2.2:66848041-66852756	1638	1.26616	1.46898	2.08765	0	0	1.46898	2.08765	1.26616	-0.169635	11.8598	-11.2929	0.69955	0.945454	1.34596e-08	0.00102572	0.684462	1	1.67923e-05	0.130556	1	gnl|BL_ORD_ID|546241 sp|Q9URW6|YIE2_SCHPO SH3 domain-containing protein PJ696.02 OS=Schizosaccharomyces pombe (strain 972 / ATCC 24843) OX=284812 GN=SPAPJ696.02 PE=1 SV=1//8.21795e-28
MS.gene54083	MS.gene54083	chr1.2:10156411-10158289	1632	0.384331	0.542058	0.804503	0	0	0.542058	0.804503	0.384331	-0.544237	9.16231	-8.61405	1.07405	0.76614	0.000181088	0.00102365	0.535405	1	0.0409353	0.130556	1	gnl|BL_ORD_ID|311969 sp|Q8L6Y3|PP396_ARATH Pentatricopeptide repeat-containing protein At5g24830 OS=Arabidopsis thaliana OX=3702 GN=At5g24830 PE=2 SV=1//2.11e-156
MS.gene58016	MS.gene58016	chr8.3:10711378-10715224	1355	1.24673	1.74222	3.40286	0	0	1.74222	3.40286	1.24673	-0.471715	12.2799	-11.2447	1.47319	0.84501	8.20487e-10	0.00108201	0.371687	1	1.40848e-06	0.135603	1	gnl|BL_ORD_ID|312132 sp|Q949Y3|PPA26_ARATH Bifunctional purple acid phosphatase 26 OS=Arabidopsis thaliana OX=3702 GN=PAP26 PE=1 SV=1//0
MS.gene011975	MS.gene011975	chr8.4:28674866-28681167	1521	1.86337	1.31952	2.15361	0	0	1.31952	2.15361	1.86337	0.427799	11.7564	-11.2274	0.0888638	0.807456	1.40775e-08	0.00110632	0.922472	1	1.728e-05	0.137343	1	gnl|BL_ORD_ID|422102 sp|Q42404|RU17_ARATH U1 small nuclear ribonucleoprotein 70 kDa OS=Arabidopsis thaliana OX=3702 GN=RNU1 PE=1 SV=1//3.05597e-89
XLOC_327180	XLOC_327180	chr8.4:80953975-80970137	1382	0.330636	0.39901	0.447642	0	0	0.39901	0.447642	0.330636	-0.262483	11.4234	-11.1906	0.463166	0.913667	8.15423e-08	0.00114525	0.78329	1	7.96769e-05	0.139739	1	-
MS.gene41582	MS.gene41582	chr3.1:50241521-50245075	1494	0.473091	0.296438	0.729874	0	0	0.296438	0.729874	0.473091	0.672834	9.97249	-8.62593	0.633807	0.619788	3.40654e-05	0.0011945	0.606905	1	0.0127501	0.143621	1	gnl|BL_ORD_ID|428867 sp|Q8GYW8|SCT_ARATH Spermidine coumaroyl-CoA acyltransferase OS=Arabidopsis thaliana OX=3702 GN=SCT PE=1 SV=1//3.61879e-89
MS.gene058407	MS.gene058407	chr3.2:2968365-2974664	1776	0.101085	0.158677	0.361607	0	0	0.158677	0.361607	0.101085	-0.651757	9.76901	-8.55955	1.83239	0.636891	3.25301e-05	0.00120369	0.130684	1	0.0123802	0.144265	1	gnl|BL_ORD_ID|436144 sp|Q8VXX5|SKS1_ARATH Monocopper oxidase-like protein SKS1 OS=Arabidopsis thaliana OX=3702 GN=SKS1 PE=1 SV=1//0
MS.gene34972	MS.gene34972	chr4.4:17954179-17956917	1098	1.02241	0.358876	0.682152	0	0	0.358876	0.682152	1.02241	1.48046	9.47683	-8.54551	-0.577611	0.235163	7.04204e-05	0.00127836	0.602473	1	0.0213518	0.149082	1	gnl|BL_ORD_ID|99571 sp|D4N501|DIOX2_PAPSO Probable 2-oxoglutarate/Fe(II)-dependent dioxygenase OS=Papaver somniferum OX=3469 GN=DIOX2 PE=2 SV=1//1.48637e-136
MS.gene016462	MS.gene016462	chr8.4:57411671-57416618	1575	0.104438	1.06221	0.743084	0	0	1.06221	0.743084	0.104438	-3.39556	10.4732	-11.0284	2.82348	0.179801	6.5951e-06	0.00135168	0.10587	1	0.00350174	0.153883	1	gnl|BL_ORD_ID|48668 sp|H1A981|C7263_MEDTR 11-oxo-beta-amyrin 30-oxidase OS=Medicago truncatula OX=3880 GN=CYP72A63 PE=1 SV=1//0
MS.gene051523	MS.gene051523	chr1.3:7474328-7477732	942	2.35984	1.67707	1.4175	0	0	1.67707	1.4175	2.35984	0.536217	10.8508	-11.0146	-0.744078	0.828097	8.73195e-07	0.00137206	0.673633	1	0.00063491	0.15495	1	gnl|BL_ORD_ID|12939 sp|Q8RXD3|AIP2_ARATH E3 ubiquitin-protein ligase AIP2 OS=Arabidopsis thaliana OX=3702 GN=AIP2 PE=1 SV=1//1.73034e-112
XLOC_327649	XLOC_327649	chr8.4:7497389-7509196	7846	0.454041	0.457784	0.674693	0	0	0.457784	0.674693	0.454041	-0.0022399	11.5574	-10.9351	0.593966	1	5.36953e-08	0.0014975	0.724909	1	5.57243e-05	0.164732	1	-
MS.gene80704	MS.gene80704	chr5.4:24099432-24106659	1812	1.03126	0.672745	0.865922	0	0	0.672745	0.865922	1.03126	0.550132	11.2012	-10.9175	-0.276371	0.823753	4.24325e-07	0.00152483	0.876332	1	0.000338565	0.166114	1	gnl|BL_ORD_ID|304618 sp|P42347|PI3K1_SOYBN Phosphatidylinositol 3-kinase, root isoform OS=Glycine max OX=3847 PE=2 SV=1//0
MS.gene003568	MS.gene003568	chr4.1:30541276-30543540	1251	1.15226	2.1008	3.12729	0	0	2.1008	3.12729	1.15226	-0.935931	11.387	-10.885	1.42874	0.625041	1.09784e-07	0.00157703	0.208199	1	0.000101478	0.169767	1	gnl|BL_ORD_ID|249388 sp|O22469|MSI3_ARATH WD-40 repeat-containing protein MSI3 OS=Arabidopsis thaliana OX=3702 GN=MSI3 PE=1 SV=2//4.46136e-169
MS.gene60567	MS.gene60567	chr1.2:69023913-69037786	4542	0.0717875	0.0861175	0.105335	0	0	0.0861175	0.105335	0.0717875	-0.262244	9.1378	-8.78565	0.582657	0.894942	0.000173265	0.00158715	0.735581	1	0.0397574	0.170427	1	gnl|BL_ORD_ID|296355 sp|Q2PCF1|PDR2_NICPL Pleiotropic drug resistance protein 2 OS=Nicotiana plumbaginifolia OX=4092 GN=PDR2 PE=2 SV=1//0
MS.gene52813	MS.gene52813	chr3.1:90756480-90761862	1266	0.386518	0.166638	0.392086	0	0	0.166638	0.392086	0.386518	1.20245	9.66905	-8.40036	0.0331773	0.346072	5.28798e-05	0.00160335	0.979894	1	0.0178395	0.171053	1	gnl|BL_ORD_ID|275212 sp|Q0JIL1|NRX2_ORYSJ Probable nucleoredoxin 2 OS=Oryza sativa subsp. japonica OX=39947 GN=Os01g0794400 PE=2 SV=1//2.05572e-124
MS.gene21614	MS.gene21614	10953:268-3888	1943	0.42643	0.311845	0.428005	0	0	0.311845	0.428005	0.42643	0.473557	9.21326	-8.70147	0.00608063	0.72947	0.000145967	0.00163858	1	1	0.0354533	0.172411	1	gnl|BL_ORD_ID|347604 sp|Q9ZVT8|RF4_ARATH Putative E3 ubiquitin-protein ligase RF4 OS=Arabidopsis thaliana OX=3702 GN=RF4 PE=3 SV=1//2.2772e-06
MS.gene75579	MS.gene75579	chr3.3:71557557-71562979	1857	0.930119	0.903161	1.22954	0	0	0.903161	1.22954	0.930119	0.0862259	11.3135	-10.794	0.390387	0.973031	1.26881e-07	0.00174682	0.82208	1	0.000115412	0.17919	1	gnl|BL_ORD_ID|105655 sp|Q14181|DPOA2_HUMAN DNA polymerase alpha subunit B OS=Homo sapiens OX=9606 GN=POLA2 PE=1 SV=2//4.55372e-67
MS.gene04681	MS.gene04681	chr7.3:16659564-16661383	657	0.383411	0.455876	0.792111	0	0	0.455876	0.792111	0.383411	-0.252908	9.10293	-8.3058	1.02776	0.863552	0.000200922	0.00188933	0.423914	1	0.0444077	0.186906	1	-//-
MS.gene057233	MS.gene057233	chr3.2:77850027-77853745	1122	0.96072	0.642072	1.80044	0.0069	0.0069	0.642072	1.80044	0.96072	0.58299	7.48402	-5.96212	0.917237	0.630205	6.80369e-06	0.00189248	0.364188	1	0.00358746	0.187135	1	gnl|BL_ORD_ID|64080 sp|Q9S7N9|CID12_ARATH Polyadenylate-binding protein-interacting protein 12 OS=Arabidopsis thaliana OX=3702 GN=CID12 PE=1 SV=1//9.17013e-13
MS.gene050719	MS.gene050719	50570:13071-15349	774	0.534288	2.02162	1.45942	0	0	2.02162	1.45942	0.534288	-1.89677	10.3266	-10.7041	1.47727	0.434484	8.02683e-06	0.00191384	0.384615	1	0.00403663	0.188254	1	gnl|BL_ORD_ID|86641 sp|Q41651|CYPB_VICFA Peptidyl-prolyl cis-trans isomerase, chloroplastic OS=Vicia faba OX=3906 PE=1 SV=1//1.34056e-117
MS.gene051937	MS.gene051937	chr2.2:2999469-3002793	855	0.38646	0.402481	0.486452	0	0	0.402481	0.486452	0.38646	-0.144325	9.29908	-9.05713	0.364629	0.929645	0.000199017	0.00199088	0.77572	1	0.0441312	0.193047	1	-//-
MS.gene82085	MS.gene82085	chr7.3:58354035-58356507	828	9.00318	1.7493	6.11142	0	0	1.7493	6.11142	9.00318	2.37859	12.4762	-10.6147	-0.548329	0.174478	4.6141e-10	0.00210186	0.554115	1	8.77882e-07	0.20038	1	gnl|BL_ORD_ID|124327 sp|Q9SHY6|EXPB2_ARATH Putative expansin-B2 OS=Arabidopsis thaliana OX=3702 GN=EXPB2 PE=3 SV=2//2.3087e-104
MS.gene21848	MS.gene21848	chr5.2:1127825-1131302	816	2.71355	1.10543	2.89584	0	0	1.10543	2.89584	2.71355	1.21029	11.9177	-10.5775	0.112403	0.485798	1.08798e-08	0.00218494	0.90234	1	1.37237e-05	0.204546	1	gnl|BL_ORD_ID|448762 sp|A0LHG0|SURE_SYNFM 5&apos;-nucleotidase SurE OS=Syntrophobacter fumaroxidans (strain DSM 10017 / MPOB) OX=335543 GN=surE PE=3 SV=1//7.87157e-40
MS.gene04608	MS.gene04608	chr7.4:15663771-15667121	1020	0.32004	0.213486	0.401846	0	0	0.213486	0.401846	0.32004	0.554348	9.02019	-8.11436	0.327409	0.684413	0.000231998	0.00259952	0.790616	1	0.0492269	0.226497	1	gnl|BL_ORD_ID|441728 sp|Q700W2|SPL9_ARATH Squamosa promoter-binding-like protein 9 OS=Arabidopsis thaliana OX=3702 GN=SPL9 PE=2 SV=2//1.18047e-61
MS.gene046322	MS.gene046322	chr3.4:8153011-8157414	1983	0.249276	0.84427	1.41411	0	0	0.84427	1.41411	0.249276	-1.70618	11.1772	-10.3947	2.46223	0.490761	8.98248e-06	0.00263507	0.189613	1	0.00441986	0.227557	1	gnl|BL_ORD_ID|78325 sp|Q8GYA4|CRK10_ARATH Cysteine-rich receptor-like protein kinase 10 OS=Arabidopsis thaliana OX=3702 GN=CRK10 PE=1 SV=3//5.16551e-156
MS.gene49648	MS.gene49648	chr5.1:28010112-28014543	1641	1.41786	1.98412	0.97095	0.0035005	0.0035005	1.98412	0.97095	1.41786	-0.548113	7.30079	-8.4009	-0.570278	0.82495	4.437e-05	0.00263758	0.751285	1	0.0156252	0.227686	1	gnl|BL_ORD_ID|112104 sp|P25698|EF1A_SOYBN Elongation factor 1-alpha OS=Glycine max OX=3847 GN=TEFS1 PE=3 SV=2//0
MS.gene036650	MS.gene036650	chr8.4:13716891-13720352	1647	1.11383	0.926208	3.77712	0	0	0.926208	3.77712	1.11383	0.197817	12.28	-10.3181	1.74843	0.936058	8.04232e-10	0.00284856	0.29652	1	1.39103e-06	0.237212	1	gnl|BL_ORD_ID|386337 sp|Q91XF4|RN167_MOUSE E3 ubiquitin-protein ligase RNF167 OS=Mus musculus OX=10090 GN=Rnf167 PE=2 SV=1//4.07957e-12
MS.gene004385	MS.gene004385	chr2.4:67460180-67465189	2901	0.566828	0.646697	1.04451	0	0	0.646697	1.04451	0.566828	-0.179446	10.9566	-10.1978	0.904567	0.940574	5.6418e-07	0.00323896	0.590502	1	0.000433703	0.257926	1	gnl|BL_ORD_ID|46396 sp|Q8RXD4|BRCA1_ARATH Protein BREAST CANCER SUSCEPTIBILITY 1 homolog OS=Arabidopsis thaliana OX=3702 GN=BRCA1 PE=1 SV=1//2.02808e-42
MS.gene55136	MS.gene55136	chr2.3:51570034-51571651	1152	5.20647	1.84686	2.13984	0	0	1.84686	2.13984	5.20647	1.51602	10.3885	-10.0835	-1.25775	0.382183	1.1099e-05	0.00361928	0.228923	1	0.00526591	0.273219	1	gnl|BL_ORD_ID|475791 sp|Q40392|TMVRN_NICGU TMV resistance protein N OS=Nicotiana glutinosa OX=35889 GN=N PE=1 SV=1//2.18841e-74
MS.gene24726	MS.gene24726	chr7.4:7335512-7338746	1026	0.680864	0.255152	0.497225	0	0	0.255152	0.497225	0.680864	1.41286	9.25339	-8.25407	-0.438857	0.333649	0.000180307	0.00363653	0.730469	1	0.0408677	0.273771	1	-//-
MS.gene045481	-	chr4.2:29857835-29863641	2586	1.27929	0.451506	0.529245	0	0	0.451506	0.529245	1.27929	1.25859	10.22	-10.0266	-1.08874	0.470398	3.13057e-05	0.00383554	0.331095	1	0.0120328	0.282487	1	gnl|BL_ORD_ID|240119 sp|F4IP69|MIP3_ARATH Sec1 family domain-containing protein MIP3 OS=Arabidopsis thaliana OX=3702 GN=MIP3 PE=1 SV=1//0
MS.gene92072	MS.gene92072	chr2.4:15749025-15750215	318	1.84741	2.19157	3.09211	0	0	2.19157	3.09211	1.84741	-0.30754	10.4216	-10.0216	0.705489	0.902493	0.000148093	0.00385554	0.723051	1	0.0357712	0.283216	1	gnl|BL_ORD_ID|339041 sp|Q40195|RB11E_LOTJA Ras-related protein Rab11E OS=Lotus japonicus OX=34305 GN=RAB11E PE=2 SV=1//1.3935e-44
MS.gene032070	MS.gene032070	14466:10887-13774	1827	0.255636	0.211958	0.622385	0	0	0.211958	0.622385	0.255636	0.245924	9.42793	-7.87056	1.28344	0.85884	8.40517e-05	0.00403278	0.301721	1	0.0241689	0.289291	1	gnl|BL_ORD_ID|149286 sp|Q9LSQ4|GH36_ARATH Indole-3-acetic acid-amido synthetase GH3.6 OS=Arabidopsis thaliana OX=3702 GN=GH3.6 PE=1 SV=1//0
MS.gene028976	MS.gene028976	15451:19071-21417	563	0.692577	1.17059	1.85189	0	0	1.17059	1.85189	0.692577	-0.711984	10.6933	-9.95941	1.40563	0.772304	1.50131e-06	0.00408964	0.414609	1	0.00101587	0.291418	1	gnl|BL_ORD_ID|502025 sp|Q8VYN2|VAP42_ARATH Vesicle-associated protein 4-2 OS=Arabidopsis thaliana OX=3702 GN=PVA42 PE=1 SV=1//3.69779e-80
MS.gene014231	MS.gene014231	chr3.3:95448962-95449952	357	4.64895	2.63433	6.43076	0	0	2.63433	6.43076	4.64895	0.848362	11.2481	-9.88494	0.475785	0.632924	1.67612e-07	0.00440291	0.626829	1	0.000150661	0.304201	1	-//-
MS.gene01717	MS.gene01717	chr2.4:72426255-72430135	2550	1.11137	0.152532	2.07386	0	0	0.152532	2.07386	1.11137	2.82134	11.5661	-7.82518	0.898543	0.0253356	8.16616e-08	0.00451039	0.369101	0.989877	7.96769e-05	0.30814	1	gnl|BL_ORD_ID|429140 sp|O81905|SD18_ARATH Receptor-like serine/threonine-protein kinase SD1-8 OS=Arabidopsis thaliana OX=3702 GN=SD18 PE=1 SV=1//0
MS.gene011974	MS.gene011974	54874:10431-15585	1521	1.12724	0.485347	1.30948	0	0	0.485347	1.30948	1.12724	1.23643	11.326	-9.82929	0.223662	0.481234	1.18492e-07	0.0046362	0.816417	1	0.000109086	0.313389	1	gnl|BL_ORD_ID|422102 sp|Q42404|RU17_ARATH U1 small nuclear ribonucleoprotein 70 kDa OS=Arabidopsis thaliana OX=3702 GN=RNU1 PE=1 SV=1//3.05597e-89
MS.gene00864	MS.gene00864	chr2.3:65375322-65380322	1272	0.218476	0.112306	0.353495	0	0	0.112306	0.353495	0.218476	0.935894	9.40622	-7.75584	0.685715	0.49794	9.6208e-05	0.00497926	0.574743	1	0.0264964	0.325813	1	gnl|BL_ORD_ID|466152 sp|Q9LDG2|TBL10_ARATH Protein trichome birefringence-like 10 OS=Arabidopsis thaliana OX=3702 GN=TBL10 PE=2 SV=1//0
MS.gene53383	MS.gene53383	chr4.1:13867474-13874799	1847	0.209918	0.090589	0.69892	0	0	0.090589	0.69892	0.209918	1.14368	10.9038	-8.03962	1.71486	0.41516	4.0781e-06	0.00505594	0.155193	1	0.00235717	0.328287	1	gnl|BL_ORD_ID|11284 sp|Q84P17|AEE18_ARATH Probable acyl-activating enzyme 18, peroxisomal OS=Arabidopsis thaliana OX=3702 GN=AAE18 PE=2 SV=1//0
MS.gene89360	MS.gene89360	50643:23162-24226	951	1.91279	2.18406	4.1573	0	0	2.18406	4.1573	1.91279	-0.183847	10.7192	-9.72337	1.14388	0.940749	1.3574e-06	0.00512959	0.495783	1	0.000930668	0.330172	1	gnl|BL_ORD_ID|313573 sp|Q3EDA9|PPR46_ARATH Putative pentatricopeptide repeat-containing protein At1g16830 OS=Arabidopsis thaliana OX=3702 GN=At1g16830 PE=3 SV=2//9.46856e-21
MS.gene27961	MS.gene27961	chr4.4:11968483-11973396	2523	0.074106	0.461713	0.631173	0	0	0.461713	0.631173	0.074106	-2.60387	10.2008	-9.68626	3.07715	0.281478	9.81245e-06	0.0053385	0.0626198	1	0.00474401	0.337128	1	gnl|BL_ORD_ID|427429 sp|Q9SUN6|SBT22_ARATH Subtilisin-like protease SBT2.2 OS=Arabidopsis thaliana OX=3702 GN=SBT2.2 PE=3 SV=1//0
MS.gene02000	MS.gene02000	chr2.2:59223166-59235135	2022	0.0682625	0.0441955	0.207887	0	0	0.0441955	0.207887	0.0682625	0.556283	9.86399	-7.70779	1.5907	0.699858	0.0001099	0.0054815	0.240012	1	0.0290988	0.342514	1	gnl|BL_ORD_ID|112627 sp|F4IW10|EFGM2_ARATH Elongation factor G-2, mitochondrial OS=Arabidopsis thaliana OX=3702 GN=MEFG2 PE=1 SV=1//8.66311e-86
MS.gene66378	MS.gene66378	chr6.1:78584549-78586943	735	0.299275	0.806775	0.704657	0	0	0.806775	0.704657	0.299275	-1.4995	9.31171	-9.58862	1.21763	0.547191	0.000194275	0.00586197	0.500067	1	0.0433159	0.353336	1	gnl|BL_ORD_ID|18567 sp|Q9M9A8|APCB1_ARATH Aspartyl protease APCB1 OS=Arabidopsis thaliana OX=3702 GN=APCB1 PE=1 SV=1//1.24238e-95
MS.gene065561	-	chr2.2:22265938-22268331	249	2.83539	1.19005	0.962059	0	0	1.19005	0.962059	2.83539	1.11773	9.09624	-9.55456	-1.58938	0.643165	0.000221017	0.00607604	0.383651	1	0.0476496	0.359135	1	gnl|BL_ORD_ID|321850 sp|Q40519|PSBR_TOBAC Photosystem II 10 kDa polypeptide, chloroplastic OS=Nicotiana tabacum OX=4097 GN=PSBR PE=2 SV=1//6.5278e-35
MS.gene034628	MS.gene034628	chr1.3:39601619-39620146	3423	0.0653165	0.0973665	0.0892335	0	0	0.0973665	0.0892335	0.0653165	-0.669095	9.3188	-9.49114	0.481748	0.782985	0.000125145	0.00647912	0.782419	1	0.0318376	0.37104	1	gnl|BL_ORD_ID|162938 sp|C0LGQ5|GSO1_ARATH LRR receptor-like serine/threonine-protein kinase GSO1 OS=Arabidopsis thaliana OX=3702 GN=GSO1 PE=1 SV=1//8.20926e-165
MS.gene76239	MS.gene76239	chr1.1:79029180-79032905	897	0.261905	0.524605	0.507424	0	0	0.524605	0.507424	0.261905	-0.976597	9.47797	-9.47042	0.952119	0.620916	0.000106056	0.00661	0.477842	1	0.0285205	0.374659	1	gnl|BL_ORD_ID|387846 sp|Q9SEZ6|RNH2A_ARATH Ribonuclease H2 subunit A OS=Arabidopsis thaliana OX=3702 GN=At2g25100 PE=2 SV=2//1.34365e-162
MS.gene43687	MS.gene43687	chr5.1:53191704-53195888	1680	0.0633425	0.114607	0.363364	0	0	0.114607	0.363364	0.0633425	-0.890734	9.17518	-7.55031	2.49676	0.6406	0.000229162	0.00690683	0.145574	1	0.0488151	0.384975	1	gnl|BL_ORD_ID|192835 sp|Q71VM4|IMA1A_ORYSJ Importin subunit alpha-1a OS=Oryza sativa subsp. japonica OX=39947 GN=Os01g0253300 PE=1 SV=2//1.5288e-69
MS.gene045397	MS.gene045397	chr3.4:78549228-78552277	1494	1.03395	0.59271	0.805222	0	0	0.59271	0.805222	1.03395	0.843589	9.86846	-9.35693	-0.372101	0.731753	2.44027e-05	0.00736116	0.834417	1	0.0099313	0.398472	1	gnl|BL_ORD_ID|110206 sp|Q94CD8|E134_ARATH Glucan endo-1,3-beta-glucosidase 4 OS=Arabidopsis thaliana OX=3702 GN=At3g13560 PE=1 SV=1//0
MS.gene003853	MS.gene003853	chr4.2:38327914-38331230	1752	0.493366	0.524857	0.893378	0	0	0.524857	0.893378	0.493366	-0.0855546	10.1373	-9.30891	0.881234	0.972451	1.15752e-05	0.00776987	0.606612	1	0.00543781	0.409826	1	gnl|BL_ORD_ID|440691 sp|P21885|SPEA_BACSU Arginine decarboxylase OS=Bacillus subtilis (strain 168) OX=224308 GN=speA PE=1 SV=2//1.18576e-101
MS.gene55995	MS.gene55995	chr2.3:56496947-56504395	1788	2.30931	1.5793	2.75164	0.11118	0.11118	1.5793	2.75164	2.30931	0.477504	4.40623	-3.64733	0.266823	0.661713	6.12171e-05	0.0078774	0.754077	1	0.019412	0.412215	1	gnl|BL_ORD_ID|13380 sp|Q0WSF1|AL221_ARATH Aldehyde dehydrogenase 22A1 OS=Arabidopsis thaliana OX=3702 GN=ALDH22A1 PE=2 SV=2//0
MS.gene60196	MS.gene60196	chr8.4:25231371-25232126	411	9.45965	5.98386	10.1578	0.130475	0.130475	5.98386	10.1578	9.45965	0.682601	5.83541	-4.9888	0.121408	0.617744	6.36521e-05	0.00800229	0.901675	1	0.0199077	0.415948	1	gnl|BL_ORD_ID|166289 sp|Q71H73|H33_VITVI Histone H3.3 OS=Vitis vinifera OX=29760 PE=2 SV=3//7.24873e-94
MS.gene027563	MS.gene027563	chr5.1:25957127-25959332	828	3.01953	1.73063	2.45128	0.0087485	0.0087485	1.73063	2.45128	3.01953	0.722445	7.71552	-7.27702	-0.283936	0.681832	1.44043e-05	0.00853844	0.785179	1	0.00659055	0.430771	1	gnl|BL_ORD_ID|437833 sp|Q8VWZ8|SMO22_ARATH Methylsterol monooxygenase 2-2 OS=Arabidopsis thaliana OX=3702 GN=SMO2-2 PE=2 SV=1//1.12968e-125
MS.gene01507	MS.gene01507	chr2.2:68021515-68023781	582	0.228095	0.192657	0.742538	0	0	0.192657	0.742538	0.228095	0.185328	9.30908	-7.40457	1.69928	0.933819	0.000154966	0.0089228	0.328374	1	0.0369319	0.4403	1	gnl|BL_ORD_ID|116187 sp|Q9LMU1|EGY3_ARATH Probable zinc metallopeptidase EGY3, chloroplastic OS=Arabidopsis thaliana OX=3702 GN=EGY3 PE=1 SV=1//6.00397e-76
MS.gene066095	MS.gene066095	chr8.4:19362667-19365765	2907	0.493042	0.447277	0.619755	0	0	0.447277	0.619755	0.493042	0.0364086	9.52364	-9.11466	0.363363	0.993166	6.34704e-05	0.00939057	0.837816	1	0.0198781	0.451409	1	gnl|BL_ORD_ID|335383 sp|B8XCH5|QKY_ARATH Protein QUIRKY OS=Arabidopsis thaliana OX=3702 GN=QKY PE=2 SV=1//3.29552e-27
MS.gene057943	MS.gene057943	chr3.4:15567975-15571725	576	0.105651	0.144879	0.383068	0	0	0.144879	0.383068	0.105651	-0.458119	9.10907	-7.67979	1.84944	0.831085	0.000200063	0.0095656	0.278758	1	0.0443035	0.456435	1	-//-
MS.gene067582	MS.gene067582	chr4.1:24344657-24349631	525	0.751064	0.244316	1.58203	0	0	0.244316	1.58203	0.751064	1.53089	11.5322	-8.92506	1.07022	0.386515	1.01069e-07	0.0113423	0.293215	1	9.49602e-05	0.495547	1	gnl|BL_ORD_ID|211240 sp|Q9SHE9|LBD4_ARATH LOB domain-containing protein 4 OS=Arabidopsis thaliana OX=3702 GN=LBD4 PE=1 SV=1//2.356e-70
MS.gene065948	MS.gene065948	chr4.2:31418913-31424753	1363	0.220192	0.224205	0.438113	0	0	0.224205	0.438113	0.220192	0.0164006	9.93873	-8.89734	0.984684	0.995192	2.16081e-05	0.0116046	0.452452	1	0.00901903	0.500115	1	gnl|BL_ORD_ID|47443 sp|F4IVI0|BUB1_ARATH Mitotic checkpoint serine/threonine-protein kinase BUB1 OS=Arabidopsis thaliana OX=3702 GN=BUB1 PE=1 SV=1//0
MS.gene003338	MS.gene003338	chr2.4:58949573-58954463	1056	13.0546	3.19447	20.9657	0.243096	0.243096	3.19447	20.9657	13.0546	2.04865	6.19265	-3.42114	0.694649	0.0654757	3.71502e-08	0.0138639	0.366411	1	4.07782e-05	0.549574	1	-//-
MS.gene74991	MS.gene74991	chr2.4:12430664-12461346	360	2.07503	9.16887	16.4934	1.25328	1.25328	9.16887	16.4934	2.07503	-1.98184	3.47489	-2.44275	3.0102	0.301303	0.000104152	0.0149933	0.114078	1	0.0282157	0.57013	1	-//-
XLOC_209150	XLOC_209150	chr5.3:25762103-25767385	1324	0.24626	0.180882	0.540092	0	0	0.180882	0.540092	0.24626	0.370692	10.0632	-8.57697	1.1128	0.846441	3.96083e-05	0.015481	0.369795	1	0.0143768	0.579167	1	-
MS.gene047468	MS.gene047468	chr2.4:66987361-66991793	1850	0.425553	0.228519	0.404844	0	0	0.228519	0.404844	0.425553	0.938687	9.43018	-8.52945	-0.0818363	0.704888	8.99035e-05	0.0161289	0.963769	1	0.0253409	0.588191	1	gnl|BL_ORD_ID|283800 sp|Q8L7L0|OBGC_ARATH GTP-binding protein OBGC, chloroplastic OS=Arabidopsis thaliana OX=3702 GN=OBGL PE=2 SV=1//0
MS.gene019683	MS.gene019683	chr8.2:68078993-68080453	1152	0.61134	0.607112	1.16728	0	0	0.607112	1.16728	0.61134	-0.0832499	9.35911	-8.46406	0.962881	0.977611	0.000107795	0.0172946	0.575482	1	0.0287513	0.610214	1	gnl|BL_ORD_ID|270575 sp|Q55ED4|NKAP_DICDI NKAP family protein OS=Dictyostelium discoideum OX=44689 GN=DDB_G0269284 PE=3 SV=1//2.52505e-40
MS.gene52141	MS.gene52141	chr4.1:29208561-29212623	1914	0.097637	0.079995	0.479069	0	0	0.079995	0.479069	0.097637	0.25678	9.51118	-6.98212	2.25361	0.900815	0.000212615	0.017804	0.223854	1	0.0463194	0.62063	1	gnl|BL_ORD_ID|164836 sp|Q9M995|GUN5_ARATH Endoglucanase 5 OS=Arabidopsis thaliana OX=3702 GN=At1g48930 PE=2 SV=1//0
MS.gene54814	MS.gene54814	chr1.3:49261800-49265610	651	0.549256	0.220306	1.08028	0	0	0.220306	1.08028	0.549256	1.21346	10.5902	-8.38873	0.987566	0.612768	7.64955e-06	0.0184908	0.573778	1	0.00392545	0.632927	1	gnl|BL_ORD_ID|507891 sp|Q941D5|VPS2C_ARATH Vacuolar protein sorting-associated protein 2 homolog 3 OS=Arabidopsis thaliana OX=3702 GN=VPS2.3 PE=2 SV=1//7.26083e-119
MS.gene037081	MS.gene037081	chr2.1:52167390-52171227	1272	0.082884	0.230084	0.777728	0	0	0.230084	0.777728	0.082884	-1.3651	10.1914	-8.33537	3.17188	0.50267	0.000207463	0.0193408	0.048788	1	0.0454573	0.645659	1	gnl|BL_ORD_ID|250279 sp|K7R4D4|MSR_TRIFG Protein MANNAN SYNTHESIS-RELATED OS=Trigonella foenum-graecum OX=78534 GN=MSR PE=2 SV=1//0
MS.gene055403	MS.gene055403	chr8.1:86610034-86615518	1287	8.01257	1.78948	12.4705	0.091412	0.091412	1.78948	12.4705	8.01257	2.10471	6.88027	-4.07892	0.670956	0.042999	5.62454e-05	0.0199885	0.479218	1	0.0186109	0.655481	1	gnl|BL_ORD_ID|306783 sp|O48723|PLP2_ARATH Patatin-like protein 2 OS=Arabidopsis thaliana OX=3702 GN=PLP2 PE=1 SV=1//2.19562e-81
MS.gene013374	MS.gene013374	chr3.4:86443515-86445941	1002	0.82048	0.324026	0.708793	0	0	0.324026	0.708793	0.82048	1.26442	9.36948	-8.29281	-0.201676	0.486488	9.58973e-05	0.0200743	0.864427	1	0.0264428	0.655755	1	gnl|BL_ORD_ID|434139 sp|Q9LS48|SG1_ARATH protein SLOW GREEN 1, chloroplastic OS=Arabidopsis thaliana OX=3702 GN=SG1 PE=1 SV=1//2.84112e-40
MS.gene012923	MS.gene012923	chr3.4:90110610-90112359	1059	1.38461	0.439632	0.909655	0	0	0.439632	0.909655	1.38461	1.58018	9.26653	-8.25936	-0.590257	0.378713	0.000143632	0.0206253	0.605648	1	0.0350089	0.661943	1	gnl|BL_ORD_ID|54761 sp|Q9FMH5|CCA31_ARATH Putative cyclin-A3-1 OS=Arabidopsis thaliana OX=3702 GN=CYCA3-1 PE=3 SV=1//5.57958e-130
MS.gene069072	MS.gene069072	chr7.4:58755747-58758071	828	10.5331	4.52577	13.843	0.581726	0.581726	4.52577	13.843	10.5331	1.20661	4.30894	-2.69585	0.392988	0.204915	0.000147921	0.0223022	0.672963	1	0.0357712	0.685527	1	gnl|BL_ORD_ID|124327 sp|Q9SHY6|EXPB2_ARATH Putative expansin-B2 OS=Arabidopsis thaliana OX=3702 GN=EXPB2 PE=3 SV=2//2.11644e-104
MS.gene039114	MS.gene039114	chr2.2:22982651-22986268	1812	0.93128	0.199886	1.54274	0	0	0.199886	1.54274	0.93128	2.11661	11.0563	-8.17219	0.757201	0.384818	3.68101e-07	0.022511	0.653479	1	0.000299083	0.688521	1	-//-
MS.gene037388	MS.gene037388	chr1.3:77821847-77823736	1035	0.853939	0.399274	0.884931	0	0	0.399274	0.884931	0.853939	1.09676	9.32173	-8.11106	0.0794141	0.649483	0.000108185	0.0239311	0.966086	1	0.0288216	0.710037	1	gnl|BL_ORD_ID|14682 sp|O49696|ALMTC_ARATH Aluminum-activated malate transporter 12 OS=Arabidopsis thaliana OX=3702 GN=ALMT12 PE=2 SV=1//4.23423e-128
MS.gene001335	MS.gene001335	chr7.4:93311531-93313054	680	2.6911	0.483142	1.94041	0	0	0.483142	1.94041	2.6911	2.49657	10.1578	-8.07324	-0.457976	0.157568	1.87089e-05	0.024484	0.681245	1	0.00805941	0.717351	1	gnl|BL_ORD_ID|315644 sp|Q9ZW82|PRNL2_ARATH Pirin-like protein 2 OS=Arabidopsis thaliana OX=3702 GN=PRN2 PE=1 SV=3//7.12485e-120
MS.gene44451	MS.gene44451	chr8.1:25247623-25250031	654	0.702937	0.258194	0.793663	0	0	0.258194	0.793663	0.702937	1.34302	9.50275	-7.95958	0.192355	0.580421	6.96013e-05	0.027008	0.914752	1	0.0212909	0.748441	1	-//-
MS.gene006765	-	chr4.1:25561307-25571970	1425	0.0837145	0.0601865	0.520953	0	0	0.0601865	0.520953	0.0837145	0.545599	10.0544	-6.85262	2.6134	0.737601	2.77125e-05	0.027569	0.0462986	1	0.0109466	0.755778	1	-//-
MS.gene69371	MS.gene69371	chr3.3:93541052-93546403	1266	0.398731	0.110986	0.418888	0	0	0.110986	0.418888	0.398731	1.85296	9.75429	-7.77639	0.0821775	0.303103	4.24021e-05	0.0321654	0.947014	1	0.0151951	0.809452	1	gnl|BL_ORD_ID|275212 sp|Q0JIL1|NRX2_ORYSJ Probable nucleoredoxin 2 OS=Oryza sativa subsp. japonica OX=39947 GN=Os01g0794400 PE=2 SV=1//2.05572e-124
MS.gene008829	-	chr8.1:34849762-34919523	525	0.320508	0.230772	0.445574	0.031008	0.031008	0.230772	0.445574	0.320508	0.910963	4.1812	-2.67763	0.568613	0.524018	0.000204179	0.0329206	0.674342	1	0.04491	0.818104	1	-//-
MS.gene25771	MS.gene25771	chr3.2:70908852-70920070	2142	4.93459	0.81987	2.46974	0.070658	0.070658	0.81987	2.46974	4.93459	2.5049	4.88849	-3.35076	-0.974486	0.0479085	5.89547e-05	0.0346205	0.252495	1	0.0190312	0.83468	1	gnl|BL_ORD_ID|3971 sp|Q8H0V6|AB3F_ARATH ABC transporter F family member 3 OS=Arabidopsis thaliana OX=3702 GN=ABCF3 PE=1 SV=1//0
MS.gene014628	MS.gene014628	chr3.1:88147257-88149735	972	0.361209	0.227083	1.01138	0	0	0.227083	1.01138	0.361209	0.691248	9.91362	-7.67901	1.50381	0.773043	2.26255e-05	0.0346595	0.375831	1	0.00937511	0.834804	1	gnl|BL_ORD_ID|143155 sp|P69781|GAT12_ARATH GATA transcription factor 12 OS=Arabidopsis thaliana OX=3702 GN=GATA12 PE=2 SV=1//2.52177e-80
MS.gene064845	MS.gene064845	chr3.3:94302429-94305303	1122	0.29077	0.078932	3.75544	0	0	0.078932	3.75544	0.29077	1.79228	11.9651	-6.50096	3.65421	0.389285	1.44717e-05	0.0377176	0.0760164	1	0.00660814	0.865918	1	gnl|BL_ORD_ID|294284 sp|Q9LDZ5|PBL21_ARATH Probable serine/threonine-protein kinase PBL21 OS=Arabidopsis thaliana OX=3702 GN=PBL21 PE=1 SV=1//5.09628e-179
MS.gene023582	MS.gene023582	chr4.4:13647972-13649951	1047	1.34433	0.257568	1.37402	0	0	0.257568	1.37402	1.34433	2.39527	10.0504	-7.54724	0.0595005	0.181204	5.77036e-05	0.0394637	0.963331	1	0.0188746	0.8808	1	gnl|BL_ORD_ID|289466 sp|P22895|P34_SOYBN P34 probable thiol protease OS=Glycine max OX=3847 PE=1 SV=1//2.14724e-97
MS.gene051362	MS.gene051362	chr7.4:6918509-6922671	843	0.284304	0.121664	0.599661	0	0	0.121664	0.599661	0.284304	0.98437	9.74651	-7.46811	1.27857	0.615956	4.10708e-05	0.0417802	0.3332	1	0.0148136	0.899385	1	gnl|BL_ORD_ID|160839 sp|Q9SJR5|GRF3_ARATH Growth-regulating factor 3 OS=Arabidopsis thaliana OX=3702 GN=GRF3 PE=1 SV=1//9.69247e-46
MS.gene058913	MS.gene058913	57393:7991-11336	1677	0.279414	0.128619	0.416675	0	0	0.128619	0.416675	0.279414	1.02809	9.07134	-7.43853	0.591202	0.591185	0.000203011	0.0431886	0.63478	1	0.0447394	0.911298	1	gnl|BL_ORD_ID|164779 sp|P54583|GUN1_ACIC1 Endoglucanase E1 OS=Acidothermus cellulolyticus (strain ATCC 43068 / 11B) OX=351607 GN=Acel_0614 PE=1 SV=1//1.07485e-13
MS.gene041425	MS.gene041425	chr8.2:12307409-12313325	2202	0.381729	0.0765925	0.327529	0	0	0.0765925	0.327529	0.381729	2.34135	9.53687	-7.37138	-0.215532	0.196331	6.30514e-05	0.0457963	0.857253	1	0.019774	0.930638	1	gnl|BL_ORD_ID|230432 sp|O80786|MCM5_ARATH DNA replication licensing factor MCM5 OS=Arabidopsis thaliana OX=3702 GN=MCM5 PE=1 SV=1//0
MS.gene033328	MS.gene033328	chr8.2:20413690-20417555	2802	0.351925	0.0988465	0.400548	0	0	0.0988465	0.400548	0.351925	1.73347	9.21357	-7.2808	0.186996	0.347265	0.000143529	0.0502498	0.881488	1	0.0350089	0.964366	1	gnl|BL_ORD_ID|446198 sp|F4JRP8|STIL2_ARATH Protein STICHEL-like 2 OS=Arabidopsis thaliana OX=3702 GN=At4g24790 PE=3 SV=1//0
MS.gene41083	MS.gene41083	10676:1145-4857	1173	0.131271	0.10726	0.65001	0	0	0.10726	0.65001	0.131271	0.294462	9.83109	-7.20644	2.29787	0.919677	5.07086e-05	0.053854	0.180642	1	0.0172798	0.991402	1	gnl|BL_ORD_ID|110357 sp|Q9FNY0|E2FA_ARATH Transcription factor E2FA OS=Arabidopsis thaliana OX=3702 GN=E2FA PE=1 SV=1//1.09286e-135
MS.gene030626	MS.gene030626	chr4.3:8225390-8231648	1752	2.01989	0.030223	2.29247	0	0	0.030223	2.29247	2.01989	5.98928	12.4102	-6.18108	0.209034	0.0204364	4.04327e-10	0.138055	0.902279	0.889861	7.95802e-07	1	1	gnl|BL_ORD_ID|289595 sp|Q9FMJ0|P4KB1_ARATH Phosphatidylinositol 4-kinase beta 1 OS=Arabidopsis thaliana OX=3702 GN=PI4KB1 PE=1 SV=1//0
MS.gene046505	MS.gene046505	chr7.4:61478425-61482069	813	0.391319	0.0353085	1.92491	0	0	0.0353085	1.92491	0.391319	3.27728	11.351	-5.77856	2.29708	0.189568	2.35262e-06	0.2052	0.19752	1	0.00147971	1	1	gnl|BL_ORD_ID|81366 sp|P57758|CTNS_ARATH Cystinosin homolog OS=Arabidopsis thaliana OX=3702 GN=At5g40670 PE=2 SV=1//1.41316e-133
MS.gene35568	MS.gene35568	chr3.3:64568011-64575109	1863	0.526944	0.0417195	0.765075	0	0	0.0417195	0.765075	0.526944	3.57289	11.048	-6.90172	0.544932	0.0720915	7.71158e-06	0.0713057	0.704604	1	0.00392545	1	1	gnl|BL_ORD_ID|312133 sp|Q5MAU8|PPA27_ARATH Probable inactive purple acid phosphatase 27 OS=Arabidopsis thaliana OX=3702 GN=PAP27 PE=2 SV=1//0
MS.gene38821	MS.gene38821	chr7.1:16702814-16704029	351	2.03321	0.0838685	3.19834	0	0	0.0838685	3.19834	2.03321	4.51032	10.54	-5.3348	0.657884	0.0108215	2.81069e-06	0.289886	0.542219	0.63184	0.00172504	1	1	gnl|BL_ORD_ID|143137 sp|P27057|GAST1_SOLLC Protein GAST1 OS=Solanum lycopersicum OX=4081 GN=GAST1 PE=2 SV=1//9.64015e-35
MS.gene69945	MS.gene69945	chr1.2:61438882-61441700	441	1.27963	0.081294	1.35067	0	0	0.081294	1.35067	1.27963	3.83586	10.4754	-6.56099	0.0786249	0.0320103	2.16872e-05	0.0977084	0.951455	1	0.00902856	1	1	gnl|BL_ORD_ID|314162 sp|P29063|PR4B_TOBAC Pathogenesis-related protein PR-4B OS=Nicotiana tabacum OX=4097 PE=2 SV=1//1.97287e-68
MS.gene022872	-	chr8.1:83882015-83886834	564	0.808173	0.031933	0.773548	0	0	0.031933	0.773548	0.808173	4.31919	10.0227	-5.77268	-0.0956462	0.0371481	2.34318e-05	0.205702	0.948803	1	0.00962193	1	1	-//-
MS.gene73127	MS.gene73127	chr3.4:50872168-50875690	585	1.06471	0.0109015	0.731175	0	0	0.0109015	0.731175	1.06471	6.50716	9.95264	-3.93672	-0.523678	0.000252324	2.03049e-05	0.585615	0.631119	0.0614404	0.00861407	1	1	-//-
XLOC_306206	XLOC_306206	chr8.2:61992649-62000205	2017	0.364931	0.0388885	0.339853	0	0	0.0388885	0.339853	0.364931	3.23013	9.90882	-6.75937	-0.104598	0.0743856	9.8839e-05	0.0793225	0.938609	1	0.0270578	1	1	-
MS.gene26217	MS.gene26217	chr5.4:58200663-58202630	354	0.833439	0.0150955	1.24126	0	0	0.0150955	1.24126	0.833439	5.34014	9.8996	-3.94206	0.590711	0.00468011	0.000143677	0.579838	0.657755	0.402418	0.0350089	1	1	gnl|BL_ORD_ID|259759 sp|F4I507|MYO3_ARATH Myosin-3 OS=Arabidopsis thaliana OX=3702 GN=VIII-A PE=2 SV=1//1.42998e-34
MS.gene023200	MS.gene023200	chr4.3:18402235-18404923	1416	0.697654	0.135422	0.908358	0	0	0.135422	0.908358	0.697654	2.39168	9.86154	-7.0594	0.374428	0.187988	2.45603e-05	0.0606795	0.748099	1	0.00995991	1	1	gnl|BL_ORD_ID|302318 sp|Q949Z1|PGLR4_ARATH Polygalacturonase At1g48100 OS=Arabidopsis thaliana OX=3702 GN=At1g48100 PE=2 SV=1//0
MS.gene009296	MS.gene009296	chr3.3:1391907-1396864	2008	0.773881	0.054951	0.473697	0	0	0.054951	0.473697	0.773881	3.80282	9.84004	-6.66079	-0.670514	0.0314573	9.16196e-05	0.0877453	0.582057	1	0.0257293	1	1	gnl|BL_ORD_ID|427909 sp|Q9FQ19|SCC13_ARATH Sister chromatid cohesion 1 protein 3 OS=Arabidopsis thaliana OX=3702 GN=SYN3 PE=2 SV=2//3.68664e-17
MS.gene53854	MS.gene53854	chr7.4:84341331-84343629	798	0.428329	0.054727	0.995361	0	0	0.054727	0.995361	0.428329	2.955	9.80079	-5.57029	1.22762	0.246667	9.77949e-05	0.237096	0.501864	1	0.0268364	1	1	gnl|BL_ORD_ID|544883 sp|O94336|YHM3_SCHPO Uncharacterized FCP1 homology domain-containing protein C1271.03c OS=Schizosaccharomyces pombe (strain 972 / ATCC 24843) OX=284812 GN=SPBC1271.03c PE=4 SV=1//8.93088e-09
MS.gene036637	MS.gene036637	chr8.4:13579205-13581906	1284	0.095146	0.0899085	0.728222	0	0	0.0899085	0.728222	0.095146	0.150642	9.54201	-6.49901	2.87143	0.962323	7.71137e-05	0.103219	0.1024	1	0.0227469	1	1	gnl|BL_ORD_ID|446486 sp|O04249|STP7_ARATH Sugar transport protein 7 OS=Arabidopsis thaliana OX=3702 GN=STP7 PE=1 SV=1//0
MS.gene032135	MS.gene032135	chr2.1:5872412-5880552	6999	0.103791	0.0378035	0.230116	0	0	0.0378035	0.230116	0.103791	1.46237	9.48481	-6.85164	1.13754	0.438761	7.06022e-05	0.0750408	0.367599	1	0.021356	1	1	gnl|BL_ORD_ID|125907 sp|B2HIN2|FAA26_MYCMM Long-chain-fatty-acid--AMP ligase FadD26 OS=Mycobacterium marinum (strain ATCC BAA-535 / M) OX=216594 GN=fadD26 PE=3 SV=1//3.93489e-74
MS.gene46028	MS.gene46028	chr7.2:43219990-43223547	1713	0.581816	0.0345925	0.524393	0	0	0.0345925	0.524393	0.581816	4.01583	9.46683	-5.57029	-0.150511	0.0245972	8.10657e-05	0.237119	0.898159	0.975556	0.0236076	1	1	gnl|BL_ORD_ID|210282 sp|Q9SR40|LAC7_ARATH Laccase-7 OS=Arabidopsis thaliana OX=3702 GN=LAC7 PE=2 SV=1//0
MS.gene09570	MS.gene09570	chr5.2:7748104-7750568	939	0.545577	0.0896285	0.656727	0	0	0.0896285	0.656727	0.545577	2.4675	9.27543	-6.50502	0.295586	0.317078	0.00013282	0.103256	0.868875	1	0.0331416	1	1	gnl|BL_ORD_ID|150074 sp|Q9FN15|GLD27_ARATH Protein CONSERVED IN THE GREEN LINEAGE AND DIATOMS 27, chloroplastic OS=Arabidopsis thaliana OX=3702 GN=CGLD27 PE=2 SV=1//8.16245e-141
MS.gene43282	MS.gene43282	chr8.4:20413954-20418710	816	0.138879	0.034451	0.31657	0	0	0.034451	0.31657	0.138879	1.88189	9.16296	-6.11407	1.16008	0.454298	0.000211296	0.146693	0.518823	1	0.0461201	1	1	gnl|BL_ORD_ID|419627 sp|Q67J35|RSMG_SYMTH Ribosomal RNA small subunit methyltransferase G OS=Symbiobacterium thermophilum (strain T / IAM 14863) OX=292459 GN=rsmG PE=3 SV=1//2.48818e-57
MS.gene24238	MS.gene24238	chr1.2:1889775-1892727	627	0.501595	0.0511745	0.501811	0	0	0.0511745	0.501811	0.501595	3.24797	9.1506	-5.86413	0.00215436	0.0759241	0.000169992	0.188786	1	1	0.0394198	1	1	gnl|BL_ORD_ID|474704 sp|Q6ZRR5|TM136_HUMAN Transmembrane protein 136 OS=Homo sapiens OX=9606 GN=TMEM136 PE=2 SV=2//9.13291e-21
MS.gene49370	MS.gene49370	chr1.1:53570439-53587133	10657	8.15273	0.615931	8.41511	0.0185265	0.0185265	0.615931	8.41511	8.15273	3.752	8.59302	-4.74898	0.0512883	0.0412663	1.91222e-07	0.0706128	0.945437	1	0.000169878	1	1	gnl|BL_ORD_ID|41558 sp|F4HZB2|BCHA1_ARATH Protein SPIRRIG OS=Arabidopsis thaliana OX=3702 GN=SPI PE=1 SV=1//0
MS.gene025181	MS.gene025181	chr2.4:49527465-49530069	993	4.34309	0.267997	6.87742	0.038733	0.038733	0.267997	6.87742	4.34309	4.01534	7.18271	-2.4241	0.690527	0.00260501	9.30563e-05	0.255553	0.532248	0.286922	0.0260224	1	1	gnl|BL_ORD_ID|62780 sp|P17541|CHIA_CUCSA Acidic endochitinase OS=Cucumis sativus OX=3659 PE=1 SV=1//1.60372e-93
MS.gene75288	-	chr2.1:44622494-44679767	1125	0.334182	0.00913	0.100892	0.002044	0.002044	0.00913	0.100892	0.334182	5.56044	6.90074	-1.23901	0.103033	0.00121414	0.000114452	0.735053	0.928344	0.179868	0.0298093	1	1	gnl|BL_ORD_ID|494526 sp|A0A172J2G3|UGT43_PUEML UDP-glycosyltransferase 43 OS=Pueraria montana var. lobata OX=3893 GN=UGT43 PE=1 SV=2//3.71844e-19
MS.gene35823	-	chr2.1:13173820-13238594	1209	1.98728	0.0497445	2.58964	0.0160175	0.0160175	0.0497445	2.58964	1.98728	4.00861	6.2536	-1.35402	0.862058	0.00218014	3.44467e-08	0.30715	0.430341	0.257078	3.81779e-05	1	1	gnl|BL_ORD_ID|40483 sp|A8MRC7|B3GT2_ARATH Probable beta-1,3-galactosyltransferase 2 OS=Arabidopsis thaliana OX=3702 GN=B3GALT2 PE=2 SV=1//0
MS.gene062575	MS.gene062575	chr4.3:42250422-42252043	1173	6.24621	3.20331	20.7384	0.555548	0.555548	3.20331	20.7384	6.24621	0.985726	4.97775	-2.22961	1.72865	0.431462	3.00202e-06	0.111595	0.0731436	1	0.00182773	1	1	-//-
MS.gene037872	MS.gene037872	chr8.3:80903925-80909372	1287	9.51908	2.18298	13.9111	0.454773	0.454773	2.18298	13.9111	9.51908	2.07992	4.71367	-2.03972	0.577215	0.0291956	4.79498e-05	0.0839928	0.515816	1	0.0165806	1	1	gnl|BL_ORD_ID|306783 sp|O48723|PLP2_ARATH Patatin-like protein 2 OS=Arabidopsis thaliana OX=3702 GN=PLP2 PE=1 SV=1//2.19562e-81
MS.gene045344	MS.gene045344	chr3.4:79086741-79095400	2160	2.03936	0.894706	1.68028	0.0644135	0.0644135	0.894706	1.68028	2.03936	1.21212	4.44517	-3.46892	-0.269698	0.483508	0.000134598	0.0982932	0.749542	1	0.0334028	1	1	gnl|BL_ORD_ID|3302 sp|Q9LK39|AAE16_ARATH Probable acyl-activating enzyme 16, chloroplastic OS=Arabidopsis thaliana OX=3702 GN=AAE16 PE=2 SV=1//0
MS.gene046147	MS.gene046147	chr1.3:79270783-79278290	2382	0.775011	0	3.35412	0	#N/A	#N/A	3.35412	0.775011	11.1202	13.2262	#N/A	2.14116	0.000816287	1.25323e-12	#N/A	0.196873	0.138123	5.83936e-09	#N/A	1	gnl|BL_ORD_ID|466003 sp|Q0IIM8|TBC8B_HUMAN TBC1 domain family member 8B OS=Homo sapiens OX=9606 GN=TBC1D8B PE=1 SV=2//1.68479e-39
MS.gene04856	MS.gene04856	chr7.2:16655064-16658178	438	4.69716	0	6.99669	0	#N/A	#N/A	6.99669	4.69716	12.4839	13.0579	#N/A	0.585769	0.000221223	0.000123945	#N/A	0.817248	0.0567446	0.0316535	#N/A	1	gnl|BL_ORD_ID|391844 sp|Q9FJ98|RPD6A_ARATH DNA-directed RNA polymerases II, IV and V subunit 6A OS=Arabidopsis thaliana OX=3702 GN=NRPB6A PE=1 SV=1//3.28189e-65
MS.gene07504	MS.gene07504	chr1.3:55538819-55546025	1869	1.61423	0	2.86267	0	#N/A	#N/A	2.86267	1.61423	12.1523	12.9788	#N/A	0.838162	0.000317069	0.000131976	#N/A	0.739586	0.0713137	0.033003	#N/A	1	gnl|BL_ORD_ID|137764 sp|Q551H4|FRAY2_DICDI Serine/threonine-protein kinase fray2 OS=Dictyostelium discoideum OX=44689 GN=fray2 PE=3 SV=1//8.468e-106
MS.gene072350	MS.gene072350	chr7.2:16774652-16780089	1929	0.096934	0	3.19564	0	#N/A	#N/A	3.19564	0.096934	7.67129	12.7315	#N/A	5.08085	0.0276277	0.000171109	#N/A	0.0453741	1	0.0395176	#N/A	1	gnl|BL_ORD_ID|267608 sp|Q9LT35|NEK6_ARATH Serine/threonine-protein kinase Nek6 OS=Arabidopsis thaliana OX=3702 GN=NEK6 PE=3 SV=1//1.1399e-07
MS.gene060868	MS.gene060868	32605:3479-9536	888	0.356511	0	2.66438	0	#N/A	#N/A	2.66438	0.356511	9.72797	12.5926	#N/A	2.89036	0.00436276	1.45721e-10	#N/A	0.0813692	0.387342	3.13868e-07	#N/A	1	gnl|BL_ORD_ID|201607 sp|O49204|KAPS_CATRO Adenylyl-sulfate kinase, chloroplastic OS=Catharanthus roseus OX=4058 GN=AKN PE=2 SV=1//2.7496e-113
MS.gene041802	MS.gene041802	chr8.3:6735099-6740801	2087	0.26462	0	2.656	0	#N/A	#N/A	2.656	0.26462	9.20601	12.4649	#N/A	3.29849	0.00736548	7.73623e-09	#N/A	0.0578117	0.515468	1.02691e-05	#N/A	1	gnl|BL_ORD_ID|111897 sp|Q9FPR3|EDR1_ARATH Serine/threonine-protein kinase EDR1 OS=Arabidopsis thaliana OX=3702 GN=EDR1 PE=1 SV=1//2.6934e-102
MS.gene24536	MS.gene24536	chr1.2:5895049-5926689	3258	0.402207	0	0.437408	0	#N/A	#N/A	0.437408	0.402207	12.2475	12.403	#N/A	0.176341	0.000225575	4.96257e-06	#N/A	0.930064	0.0576667	0.00271707	#N/A	1	-//-
MS.gene44541	MS.gene44541	38067:2067-9410	2440	0.336977	0	1.76483	0	#N/A	#N/A	1.76483	0.336977	9.88958	12.2634	#N/A	2.41002	0.00304356	9.67737e-10	#N/A	0.140405	0.315279	1.63664e-06	#N/A	1	gnl|BL_ORD_ID|472286 sp|O24303|TI110_PEA Protein TIC110, chloroplastic OS=Pisum sativum OX=3888 GN=TIC110 PE=1 SV=1//0
MS.gene046123	MS.gene046123	chr1.1:81571651-81578486	1176	1.15636	0	1.56689	0	#N/A	#N/A	1.56689	1.15636	11.5611	11.9912	#N/A	0.465918	0.000484383	4.00331e-09	#N/A	0.780699	0.0964075	5.60741e-06	#N/A	1	gnl|BL_ORD_ID|189316 sp|Q5VNM3|IF43A_ORYSJ Eukaryotic initiation factor 4A-III homolog A OS=Oryza sativa subsp. japonica OX=39947 GN=EIF4A3A PE=1 SV=1//0
MS.gene99082	MS.gene99082	6563:77-1140	741	3.90405	0	7.15988	0	#N/A	#N/A	7.15988	3.90405	10.6673	11.5083	#N/A	0.866376	0.00162737	5.8252e-08	#N/A	0.612517	0.215243	5.99085e-05	#N/A	1	gnl|BL_ORD_ID|421310 sp|P92557|RT07_ARATH Ribosomal protein S7, mitochondrial OS=Arabidopsis thaliana OX=3702 GN=RPS7 PE=2 SV=1//3.09633e-64
MS.gene023902	MS.gene023902	chr7.1:25875836-25880682	1077	0.365361	0	1.00967	0	#N/A	#N/A	1.00967	0.365361	9.44275	10.8655	#N/A	1.45047	0.00583491	7.82474e-07	#N/A	0.396161	0.455452	0.000580029	#N/A	1	gnl|BL_ORD_ID|28921 sp|Q8LF97|ASK21_ARATH SKP1-like protein 21 OS=Arabidopsis thaliana OX=3702 GN=ASK21 PE=2 SV=1//1.46857e-133
MS.gene017882	MS.gene017882	chr7.4:17406413-17407570	561	2.17633	0	3.6516	0	#N/A	#N/A	3.6516	2.17633	9.91532	10.64	#N/A	0.76469	0.00296933	2.57379e-06	#N/A	0.655081	0.310653	0.00159249	#N/A	1	gnl|BL_ORD_ID|505138 sp|O81645|VILI3_ARATH Villin-3 OS=Arabidopsis thaliana OX=3702 GN=VLN3 PE=1 SV=2//2.30862e-11
MS.gene96733	MS.gene96733	chr3.3:26594102-26595285	783	0.508022	0	3.19581	0	#N/A	#N/A	3.19581	0.508022	7.9045	10.4859	#N/A	2.6173	0.0259803	3.6477e-06	#N/A	0.125143	0.99933	0.00216316	#N/A	1	gnl|BL_ORD_ID|116737 sp|Q6DRC4|EIF3G_DANRE Eukaryotic translation initiation factor 3 subunit G OS=Danio rerio OX=7955 GN=eif3g PE=1 SV=1//1.98706e-11
MS.gene02949	MS.gene02949	chr1.1:65171517-65179916	1617	0.255209	0	0.41809	0	#N/A	#N/A	0.41809	0.255209	9.71798	10.3935	#N/A	0.702631	0.00439758	4.52133e-06	#N/A	0.687928	0.388685	0.00253631	#N/A	1	gnl|BL_ORD_ID|317245 sp|Q5Z8Q9|PRP2A_ORYSJ Poly [ADP-ribose] polymerase 2-A OS=Oryza sativa subsp. japonica OX=39947 GN=PARP2-A PE=3 SV=2//0
MS.gene069656	MS.gene069656	chr3.4:28243367-28244183	659	0.719117	0	3.6808	0	#N/A	#N/A	3.6808	0.719117	7.86884	10.1644	#N/A	2.3271	0.0265706	9.76308e-06	#N/A	0.176323	1	0.00474155	#N/A	1	gnl|BL_ORD_ID|116745 sp|Q9Z1D1|EIF3G_MOUSE Eukaryotic translation initiation factor 3 subunit G OS=Mus musculus OX=10090 GN=Eif3g PE=1 SV=2//2.38932e-12
MS.gene014601	MS.gene014601	chr3.1:88417763-88424941	1791	0.371558	0	0.40394	0	#N/A	#N/A	0.40394	0.371558	10.032	10.0955	#N/A	0.0979686	0.00318718	2.0336e-05	#N/A	0.959006	0.322976	0.00861407	#N/A	1	gnl|BL_ORD_ID|459070 sp|O23247|SYRM_ARATH Arginine--tRNA ligase, chloroplastic/mitochondrial OS=Arabidopsis thaliana OX=3702 GN=EMB1027 PE=1 SV=1//0
MS.gene042708	MS.gene042708	chr5.2:44067234-44070333	675	0.213112	0	0.888424	0	#N/A	#N/A	0.888424	0.213112	8.0389	10.0479	#N/A	2.03785	0.0228367	1.5272e-05	#N/A	0.238646	0.940023	0.00690456	#N/A	1	gnl|BL_ORD_ID|22560 sp|B9NAN0|ARGJ_POPTR Arginine biosynthesis bifunctional protein ArgJ, chloroplastic OS=Populus trichocarpa OX=3694 GN=POPTRDRAFT_746969 PE=3 SV=2//3.37798e-90
MS.gene35864	MS.gene35864	chr2.1:13193442-13196123	1099	0.661876	0	1.0192	0	#N/A	#N/A	1.0192	0.661876	9.44275	10.0443	#N/A	0.622598	0.00583608	2.51197e-05	#N/A	0.727506	0.455452	0.0101149	#N/A	1	gnl|BL_ORD_ID|40483 sp|A8MRC7|B3GT2_ARATH Probable beta-1,3-galactosyltransferase 2 OS=Arabidopsis thaliana OX=3702 GN=B3GALT2 PE=2 SV=1//0
MS.gene80727	MS.gene80727	chr5.4:23741582-23743993	927	0.133017	0	1.13452	0	#N/A	#N/A	1.13452	0.133017	6.96802	10.0206	#N/A	3.0798	0.0546158	1.65962e-05	#N/A	0.0630144	1	0.00735754	#N/A	1	gnl|BL_ORD_ID|302318 sp|Q949Z1|PGLR4_ARATH Polygalacturonase At1g48100 OS=Arabidopsis thaliana OX=3702 GN=At1g48100 PE=2 SV=1//7.27823e-64
MS.gene90065	MS.gene90065	chr3.2:24787676-24788124	449	1.18546	0	6.08967	0	#N/A	#N/A	6.08967	1.18546	7.71676	10.0203	#N/A	2.33858	0.0310458	1.58192e-05	#N/A	0.174808	1	0.00710971	#N/A	1	gnl|BL_ORD_ID|116745 sp|Q9Z1D1|EIF3G_MOUSE Eukaryotic translation initiation factor 3 subunit G OS=Mus musculus OX=10090 GN=Eif3g PE=1 SV=2//6.4516e-13
MS.gene003233	MS.gene003233	chr2.1:62120631-62122087	1068	0.407973	0	1.77271	0	#N/A	#N/A	1.77271	0.407973	7.86884	9.96901	#N/A	2.12243	0.0265711	4.63004e-05	#N/A	0.237715	1	0.0162132	#N/A	1	gnl|BL_ORD_ID|299289 sp|P15232|PER1B_ARMRU Peroxidase C1B OS=Armoracia rusticana OX=3704 GN=PRXC1B PE=3 SV=1//2.64561e-111
MS.gene44337	MS.gene44337	chr5.1:24602571-24606230	1320	0.078776	0	0.654783	0	#N/A	#N/A	0.654783	0.078776	6.84452	9.83038	#N/A	3.01207	0.0607287	2.90833e-05	#N/A	0.0715746	1	0.0113312	#N/A	1	gnl|BL_ORD_ID|302318 sp|Q949Z1|PGLR4_ARATH Polygalacturonase At1g48100 OS=Arabidopsis thaliana OX=3702 GN=At1g48100 PE=2 SV=1//2.59942e-95
MS.gene32517	MS.gene32517	chr5.2:68609557-68616052	1929	0.052554	0	0.307378	0	#N/A	#N/A	0.307378	0.052554	7.08169	9.57802	#N/A	2.5227	0.0482896	5.38093e-05	#N/A	0.133832	1	0.0180643	#N/A	1	gnl|BL_ORD_ID|308837 sp|O22285|PMTB_ARATH Probable methyltransferase PMT11 OS=Arabidopsis thaliana OX=3702 GN=At2g39750 PE=2 SV=1//0
MS.gene006915	MS.gene006915	chr4.3:27691131-27693237	478	0.40012	0	0.885054	0	#N/A	#N/A	0.885054	0.40012	8.38018	9.47358	#N/A	1.12576	0.0166035	7.45573e-05	#N/A	0.522732	0.803426	0.0221935	#N/A	1	gnl|BL_ORD_ID|554567 sp|P42856|ZB14_MAIZE 14 kDa zinc-binding protein OS=Zea mays OX=4577 GN=ZBP14 PE=1 SV=1//4.72427e-42
MS.gene49875	MS.gene49875	33182:454-4250	2324	0.369468	0	0.496039	0	#N/A	#N/A	0.496039	0.369468	9.10234	9.46855	#N/A	0.401955	0.00823136	0.000121248	#N/A	0.829478	0.547694	0.031104	#N/A	1	gnl|BL_ORD_ID|482175 sp|Q8BV79|TRNK1_MOUSE TPR and ankyrin repeat-containing protein 1 OS=Mus musculus OX=10090 GN=Trank1 PE=2 SV=3//9.67968e-70
MS.gene44794	MS.gene44794	chr7.4:81573435-81595986	2178	0.019057	0	0.076511	0	#N/A	#N/A	0.076511	0.019057	7.40641	9.35166	#N/A	1.98638	0.00943376	0.000144562	#N/A	0.148208	0.588278	0.0351869	#N/A	1	gnl|BL_ORD_ID|116263 sp|Q9UI10|EI2BD_HUMAN Translation initiation factor eIF-2B subunit delta OS=Homo sapiens OX=9606 GN=EIF2B4 PE=1 SV=2//7.7541e-80
MS.gene026656	MS.gene026656	chr1.2:15598891-15607676	6327	0.143546	0	0.193569	0	#N/A	#N/A	0.193569	0.143546	8.92902	9.34182	#N/A	0.448572	0.0082733	0.000104843	#N/A	0.797088	0.548882	0.0283279	#N/A	1	gnl|BL_ORD_ID|79429 sp|F4I718|CSI3_ARATH Protein CELLULOSE SYNTHASE INTERACTIVE 3 OS=Arabidopsis thaliana OX=3702 GN=CSI3 PE=1 SV=1//0
MS.gene069662	MS.gene069662	chr6.1:67339761-67343842	1071	0.13304	0	0.361117	0	#N/A	#N/A	0.361117	0.13304	7.75104	9.14521	#N/A	1.42187	0.00470209	0.000177503	#N/A	0.268659	0.403092	0.0404051	#N/A	1	gnl|BL_ORD_ID|224734 sp|Q84ME1|LUL3_ARATH Probable E3 ubiquitin-protein ligase LUL3 OS=Arabidopsis thaliana OX=3702 GN=LUL3 PE=1 SV=1//5.05669e-64
MS.gene045931	-	chr8.3:44165058-44168212	1329	0.412176	1.04229	0	0.511552	0.511552	1.04229	0	0.412176	-1.2342	-9.26061	-0.646952	-8.73372	0.324107	0.000141889	0.609354	0.000360344	1	0.0347588	1	0.0608324	gnl|BL_ORD_ID|43210 sp|Q8GXT3|BH123_ARATH Transcription factor bHLH123 OS=Arabidopsis thaliana OX=3702 GN=BHLH123 PE=1 SV=1//6.65626e-77
MS.gene014280	MS.gene014280	chr3.1:92092960-92096555	1380	0.453334	1.29737	0	0.710655	0.710655	1.29737	0	0.453334	-1.54117	-10.1576	-0.634816	-9.31276	0.251658	1.00847e-05	0.583161	0.00042609	1	0.00483713	1	0.0680686	gnl|BL_ORD_ID|14422 sp|Q94G86|ALL9_OLEEU Glucan endo-1,3-beta-D-glucosidase OS=Olea europaea OX=4146 GN=OLE9 PE=1 SV=1//0
MS.gene85661	MS.gene85661	chr3.3:88895577-88899710	1074	1.93593	4.45506	0	6.89335	6.89335	4.45506	0	1.93593	-1.17247	-13.6345	0.905826	-11.635	0.517067	1.46098e-13	0.392346	0.000438142	1	1.04238e-09	1	0.0695645	gnl|BL_ORD_ID|79770 sp|Q8LAZ7|CSN5A_ARATH COP9 signalosome complex subunit 5a OS=Arabidopsis thaliana OX=3702 GN=CSN5A PE=1 SV=2//0
MS.gene29357	-	chr3.3:66025945-66039377	1971	0.648228	0.903937	0	2.40016	2.40016	0.903937	0	0.648228	-0.559327	-13.3763	1.60417	-11.2732	0.74493	4.11148e-12	0.1106	0.000520522	1	1.59102e-08	1	0.0778325	gnl|BL_ORD_ID|32086 sp|Q9M3G7|ATM_ARATH Serine/threonine-protein kinase ATM OS=Arabidopsis thaliana OX=3702 GN=ATM PE=2 SV=1//0
MS.gene06414	MS.gene06414	chr3.2:80279877-80283959	1083	1.53233	2.33246	0	2.48052	2.48052	2.33246	0	1.53233	-0.664411	-12.1447	0.299808	-11.2366	0.699964	2.81773e-09	0.767917	0.000540969	1	4.15048e-06	1	0.0798174	gnl|BL_ORD_ID|260451 sp|Q9FY82|NAC82_ARATH NAC domain-containing protein 82 OS=Arabidopsis thaliana OX=3702 GN=NAC082 PE=1 SV=1//1.99222e-85
MS.gene037409	MS.gene037409	chr1.3:78454203-78460260	3969	1.03107	1.91782	0	1.92636	1.92636	1.91782	0	1.03107	-0.940173	-12.3463	0.232796	-11.2345	0.580656	5.53865e-10	0.810059	0.000542165	1	1.02809e-06	1	0.0799435	gnl|BL_ORD_ID|117384 sp|Q9FNA4|ELP1_ARATH Elongator complex protein 1 OS=Arabidopsis thaliana OX=3702 GN=ELP1 PE=1 SV=1//0
MS.gene006637	MS.gene006637	chr4.1:26926383-26932059	1251	1.1409	1.97104	0	1.61031	1.61031	1.97104	0	1.1409	-0.800619	-11.9986	-0.0651301	-11.3304	0.644824	8.09561e-09	0.949249	0.000618847	1	1.0684e-05	1	0.0878154	-//-
MS.gene068447	-	chr6.3:64635167-64639044	1671	0.400772	1.56142	0	1.02437	1.02437	1.56142	0	0.400772	-1.57813	-9.99614	-0.574967	-9.0508	0.437407	2.27612e-05	0.763561	0.000663235	1	0.00939726	1	0.0921011	gnl|BL_ORD_ID|478619 sp|B9SCB6|TPS2_RICCO Probable terpene synthase 2 OS=Ricinus communis OX=3988 GN=TPS2 PE=3 SV=1//0
MS.gene86471	MS.gene86471	chr5.1:15824462-15825535	1074	4.32899	25.6173	0.138778	7.33855	7.33855	25.6173	0.138778	4.32899	-2.5368	-5.8025	-1.5153	-4.80959	0.0430474	1.6131e-05	0.202735	0.000670674	1	0.00720727	1	0.0926386	-//-
MS.gene53441	MS.gene53441	chr4.3:14307548-14309968	816	0.360384	0.305136	0	0.769448	0.769448	0.305136	0	0.360384	0.153233	-9.69897	1.49111	-8.4234	0.928188	0.000150933	0.327845	0.000708428	1	0.0361974	1	0.0960929	gnl|BL_ORD_ID|259192 sp|Q700D9|MYBF_ARATH Putative Myb family transcription factor At1g14600 OS=Arabidopsis thaliana OX=3702 GN=At1g14600 PE=2 SV=2//3.71878e-22
MS.gene74511	MS.gene74511	chr4.1:58985484-58987537	547	2.74738	4.54039	0	5.09701	5.09701	4.54039	0	2.74738	-0.734137	-12.1895	0.394988	-11.131	0.674551	1.36673e-09	0.686643	0.000772112	1	2.19748e-06	1	0.10172	gnl|BL_ORD_ID|382732 sp|Q9LXD1|RLF_ARATH Cytochrome b5 domain-containing protein RLF OS=Arabidopsis thaliana OX=3702 GN=RLF PE=2 SV=1//1.01526e-62
MS.gene044004	MS.gene044004	chr1.3:3671471-3673436	847	2.45408	1.72634	0	5.12933	5.12933	1.72634	0	2.45408	0.514659	-12.1276	1.86121	-10.8627	0.830403	1.59629e-06	0.350402	0.00080534	1	0.00105946	1	0.104452	gnl|BL_ORD_ID|337413 sp|Q9SX80|R47CP_ARATH Polyadenylate-binding protein RBP47C&apos; OS=Arabidopsis thaliana OX=3702 GN=RBP47C&apos; PE=2 SV=1//4.43207e-12
MS.gene058518	MS.gene058518	50223:46950-50974	777	2.25752	0.002558	0.0024105	7.12785	7.12785	0.002558	0.0024105	2.25752	8.71072	-11.3772	10.6091	-9.51182	0.00203649	0.000174266	0.000413701	0.000838988	0.244689	0.039827	0.0723687	0.107445	gnl|BL_ORD_ID|240937 sp|Q40353|MMK2_MEDSA Mitogen-activated protein kinase homolog MMK2 OS=Medicago sativa OX=3879 GN=MMK2 PE=2 SV=1//2.85244e-170
MS.gene067999	-	chr8.3:30743653-30748102	1401	53.5303	49.1115	6.20936	139.571	139.571	49.1115	6.20936	53.5303	0.109522	-4.22084	1.62517	-2.71645	0.902731	5.63012e-06	0.0936947	0.00086469	1	0.00304604	1	0.109414	gnl|BL_ORD_ID|4043 sp|Q949P1|ABAH1_ARATH Abscisic acid 8&apos;-hydroxylase 1 OS=Arabidopsis thaliana OX=3702 GN=CYP707A1 PE=2 SV=1//0
MS.gene29687	MS.gene29687	chr5.3:67433639-67436415	2648	1.79664	2.84526	0	2.52927	2.52927	2.84526	0	1.79664	-0.663075	-11.6183	0.0735322	-10.9524	0.706999	6.10297e-08	0.945749	0.000926544	1	6.24838e-05	1	0.114756	gnl|BL_ORD_ID|392463 sp|Q39214|RPM1_ARATH Disease resistance protein RPM1 OS=Arabidopsis thaliana OX=3702 GN=RPM1 PE=1 SV=1//2.46501e-110
MS.gene068442	MS.gene068442	chr6.3:64564678-64569166	1653	1.05404	1.00016	0	2.31899	2.31899	1.00016	0	1.05404	0.0127483	-12.1754	1.37455	-10.877	0.996883	1.86229e-07	0.470101	0.00100367	1	0.000166088	1	0.12134	gnl|BL_ORD_ID|478695 sp|Q6Q3H3|TPSGD_VITVI (-)-germacrene D synthase OS=Vitis vinifera OX=29760 GN=VIT_19s0014g04930 PE=1 SV=1//0
MS.gene064132	MS.gene064132	chr8.4:10735128-10737537	624	1.74883	3.1249	0	2.77523	2.77523	3.1249	0	1.74883	-0.881857	-11.5446	0.0550384	-10.6688	0.606694	4.40525e-08	0.958586	0.00100575	1	4.71105e-05	1	0.121415	gnl|BL_ORD_ID|437322 sp|Q9VMX6|SMAL1_DROME SWI/SNF-related matrix-associated actin-dependent regulator of chromatin subfamily A-like protein 1 OS=Drosophila melanogaster OX=7227 GN=Marcal1 PE=1 SV=2//3.17417e-12
MS.gene08127	MS.gene08127	chr7.4:59840682-59842147	1386	0.673929	1.25848	0	1.1196	1.1196	1.25848	0	0.673929	-0.93113	-9.52049	0.0419901	-8.60816	0.498886	8.20268e-05	0.975005	0.00102845	1	0.0237747	1	0.122946	-//-
MS.gene058661	MS.gene058661	chr7.4:27135837-27143109	3168	0.56765	6.04017	0	9.69609	9.69609	6.04017	0	0.56765	-3.4002	-14.9392	0.977497	-10.6379	0.194446	6.94312e-17	0.602824	0.0010382	1	1.47106e-12	1	0.123669	-//-
MS.gene03696	MS.gene03696	chr3.4:35908980-35914759	2462	0.712173	0.923377	0	1.42393	1.42393	0.923377	0	0.712173	-0.363407	-11.8434	0.920156	-10.6348	0.881119	9.15613e-09	0.604957	0.00104211	1	1.17442e-05	1	0.123882	gnl|BL_ORD_ID|217242 sp|Q9FFJ8|LIMYB_ARATH L10-interacting MYB domain-containing protein OS=Arabidopsis thaliana OX=3702 GN=LIMYB PE=1 SV=1//1.19441e-10
MS.gene74270	MS.gene74270	51808:4489-11258	2253	0.595383	0.439136	0	0.524882	0.524882	0.439136	0	0.595383	0.396265	-10.6369	0.489255	-10.6032	0.826945	3.61724e-06	0.684979	0.00108007	1	0.00215069	1	0.126847	gnl|BL_ORD_ID|13794 sp|Q8RWW0|ALE2_ARATH Receptor-like serine/threonine-protein kinase ALE2 OS=Arabidopsis thaliana OX=3702 GN=ALE2 PE=1 SV=1//0
MS.gene62848	MS.gene62848	chr8.4:22935872-22939713	687	1.14971	4.21093	0	3.02233	3.02233	4.21093	0	1.14971	-1.90213	-12.3394	-0.27502	-10.7781	0.270279	5.83347e-10	0.780532	0.00112012	1	1.07408e-06	1	0.130374	gnl|BL_ORD_ID|67082 sp|Q9XJ36|CLPR2_ARATH ATP-dependent Clp protease proteolytic subunit-related protein 2, chloroplastic OS=Arabidopsis thaliana OX=3702 GN=CLPR2 PE=1 SV=1//2.5618e-111
MS.gene013062	MS.gene013062	chr3.3:83370641-83373308	1644	0.927464	0.213579	0.016565	2.55919	2.55919	0.213579	0.016565	0.927464	2.12428	-7.10415	3.83512	-5.42675	0.150762	6.26802e-05	0.0139797	0.00113452	1	0.0197117	0.552267	0.131556	-//-
MS.gene69100	MS.gene69100	chr3.4:96141289-96147293	2043	2.99869	1.53544	0.271859	3.91128	3.91128	1.53544	0.271859	2.99869	0.965505	-4.06773	1.60033	-3.45484	0.342302	0.000109074	0.111554	0.00117915	1	0.0289907	1	0.134835	gnl|BL_ORD_ID|294816 sp|Q9T074|PCKA_ARATH Phosphoenolpyruvate carboxykinase (ATP) OS=Arabidopsis thaliana OX=3702 GN=PCKA PE=1 SV=1//0
MS.gene019277	MS.gene019277	chr5.4:4977984-4984152	2223	0.689267	0.0764105	0	1.28849	1.28849	0.0764105	0	0.689267	3.07872	-11.7951	4.20671	-10.7234	0.220593	1.29757e-08	0.015605	0.00118908	1	1.62776e-05	0.581689	0.135364	gnl|BL_ORD_ID|111897 sp|Q9FPR3|EDR1_ARATH Serine/threonine-protein kinase EDR1 OS=Arabidopsis thaliana OX=3702 GN=EDR1 PE=1 SV=1//4.3677e-90
MS.gene051641	MS.gene051641	chr1.3:5577141-5584413	963	0.575244	5.96031	0	4.94927	4.94927	5.96031	0	0.575244	-3.35733	-13.9773	-0.00629441	-10.6979	0.0580437	3.68857e-11	0.995661	0.00121893	1	9.90763e-08	1	0.137955	gnl|BL_ORD_ID|123964 sp|Q8CDF7|EXD1_MOUSE piRNA biogenesis protein EXD1 OS=Mus musculus OX=10090 GN=Exd1 PE=1 SV=1//1.89994e-13
MS.gene54430	MS.gene54430	chr7.3:91288016-91289662	648	2.13583	1.46014	0	4.31701	4.31701	1.46014	0	2.13583	0.450207	-11.6327	1.72351	-10.4087	0.851187	2.87466e-08	0.331334	0.00132581	1	3.26529e-05	1	0.14518	-//-
MS.gene45480	-	chr2.1:6990027-6993185	1272	1.10804	0.90116	0.0187785	1.74761	1.74761	0.90116	0.0187785	1.10804	0.373168	-6.15806	1.16837	-5.37461	0.754614	0.000210814	0.329096	0.00141113	1	0.046059	1	0.150387	gnl|BL_ORD_ID|8468 sp|O80644|ACR9_ARATH ACT domain-containing protein ACR9 OS=Arabidopsis thaliana OX=3702 GN=ACR9 PE=2 SV=1//2.52503e-177
MS.gene62857	MS.gene62857	chr8.1:21798954-21801198	1326	1.68953	2.90168	0	3.24496	3.24496	2.90168	0	1.68953	-0.844334	-11.6664	0.322891	-10.5573	0.732988	2.39725e-08	0.85828	0.00142593	1	2.76426e-05	1	0.151343	gnl|BL_ORD_ID|8467 sp|Q9LNA5|ACR8_ARATH ACT domain-containing protein ACR8 OS=Arabidopsis thaliana OX=3702 GN=ACR8 PE=2 SV=1//0
MS.gene002878	MS.gene002878	chr2.1:65990986-65992488	645	2.50763	3.90283	0	1.17558	1.17558	3.90283	0	2.50763	-0.681966	-9.63071	-1.53298	-10.5459	0.705232	4.7745e-05	0.210852	0.00144241	1	0.0165666	1	0.152389	gnl|BL_ORD_ID|224735 sp|Q8LA32|LUL4_ARATH Probable E3 ubiquitin-protein ligase LUL4 OS=Arabidopsis thaliana OX=3702 GN=LUL4 PE=2 SV=1//5.5404e-74
MS.gene020494	MS.gene020494	chr4.1:1947465-1949601	390	1.60928	1.43225	0	3.16507	3.16507	1.43225	0	1.60928	0.102808	-11.5602	1.30637	-10.414	0.967498	4.04562e-08	0.462775	0.00165204	1	4.39842e-05	1	0.166927	gnl|BL_ORD_ID|430132 sp|Q93YU5|SEC8_ARATH Exocyst complex component SEC8 OS=Arabidopsis thaliana OX=3702 GN=SEC8 PE=1 SV=1//2.66499e-61
MS.gene053626	MS.gene053626	chr4.4:21680810-21695526	2796	0.204308	0.441192	0	0.245266	0.245266	0.441192	0	0.204308	-1.13331	-10.6557	-0.595711	-10.1837	0.512029	1.73697e-06	0.594149	0.00168646	1	0.00114286	1	0.169162	gnl|BL_ORD_ID|205225 sp|Q9M0Z3|KEA3_ARATH K(+) efflux antiporter 3, chloroplastic OS=Arabidopsis thaliana OX=3702 GN=KEA3 PE=1 SV=2//0
MS.gene75260	MS.gene75260	chr2.1:43724340-43729858	576	0.608062	1.17557	0	0.323041	0.323041	1.17557	0	0.608062	-0.906283	-9.64555	-1.56134	-10.3823	0.713118	4.74379e-05	0.417996	0.00170444	1	0.0165102	1	0.170082	gnl|BL_ORD_ID|219477 sp|Q2QMB3|LOL2_ORYSJ Protein LOL2 OS=Oryza sativa subsp. japonica OX=39947 GN=LOL2 PE=2 SV=1//1.59265e-54
MS.gene073905	MS.gene073905	chr1.3:26930237-26935013	678	0.132551	0.752943	0	0.334753	0.334753	0.752943	0	0.132551	-2.49312	-9.48698	-0.910779	-7.97831	0.052036	7.8454e-05	0.46296	0.00171949	1	0.0229937	1	0.170765	gnl|BL_ORD_ID|73830 sp|P04146|COPIA_DROME Copia protein OS=Drosophila melanogaster OX=7227 GN=GIP PE=1 SV=3//7.32231e-26
MS.gene012308	-	chr8.4:7885216-7891005	714	0.779273	0.911853	0.006719	8.15082	8.15082	0.911853	0.006719	0.779273	-0.280564	-8.70147	1.89049	-6.51204	0.891401	1.39806e-08	0.280431	0.00181826	1	1.72538e-05	1	0.176838	-//-
MS.gene80155	-	chr5.1:41951820-41958261	492	0.425628	0.990692	0	0.73703	0.73703	0.990692	0	0.425628	-1.25448	-11.0464	-0.192373	-10.0495	0.465102	6.17255e-07	0.862743	0.00193646	1	0.000469758	1	0.183899	-//-
MS.gene78760	-	chr5.1:40924329-40935556	885	0.094452	0.170378	0	0.61262	0.61262	0.170378	0	0.094452	-0.899441	-10.7741	2.02021	-7.90708	0.531592	7.84572e-06	0.156695	0.00197662	1	0.00396301	1	0.186475	-//-
MS.gene072716	MS.gene072716	chr7.3:5612029-5613243	984	1.9363	1.74951	0	3.38787	3.38787	1.74951	0	1.9363	0.0467865	-10.8459	1.1154	-9.82689	0.986613	8.56284e-07	0.539453	0.00246177	1	0.000627004	1	0.213609	gnl|BL_ORD_ID|48248 sp|Q8GX84|C3H1_ARATH Zinc finger CCCH domain-containing protein 1 OS=Arabidopsis thaliana OX=3702 GN=At1g01350 PE=2 SV=2//8.48439e-151
MS.gene44404	MS.gene44404	chr1.2:85321544-85324286	1095	0.920896	1.764	0	1.68441	1.68441	1.764	0	0.920896	-0.956008	-11.0107	0.155978	-9.96919	0.589024	4.58244e-07	0.887707	0.00261743	1	0.000362018	1	0.222283	gnl|BL_ORD_ID|390933 sp|P07909|ROA1_DROME Heterogeneous nuclear ribonucleoprotein A1 OS=Drosophila melanogaster OX=7227 GN=Hrb98DE PE=2 SV=1//9.5848e-14
MS.gene65035	-	chr8.4:40390689-40456523	678	3.4916	3.3811	0.45056	8.61189	8.61189	3.3811	0.45056	3.4916	-0.00370362	-4.47024	1.58727	-2.89352	0.997141	4.74455e-06	0.0906131	0.00289835	1	0.00263562	1	0.237427	-//-
MS.gene021968	-	chr7.1:80489143-80595988	1662	14.4317	11.9329	2.37327	41.7578	41.7578	11.9329	2.37327	14.4317	0.126443	-3.99767	1.63214	-2.50498	0.897548	1.84769e-05	0.117286	0.00294887	1	0.00798964	1	0.240134	gnl|BL_ORD_ID|17548 sp|Q3E8W4|ANX2_ARATH Receptor-like protein kinase ANXUR2 OS=Arabidopsis thaliana OX=3702 GN=ANX2 PE=2 SV=1//6.19203e-10
MS.gene07827	MS.gene07827	chr8.3:72212250-72216033	906	0.560234	0.651108	0	0.410002	0.410002	0.651108	0	0.560234	-0.285167	-9.44741	-0.500473	-9.71792	0.907951	8.6773e-05	0.795189	0.00340254	1	0.0247025	1	0.262015	gnl|BL_ORD_ID|479185 sp|F4IEY4|TRB5_ARATH Telomere repeat-binding factor 5 OS=Arabidopsis thaliana OX=3702 GN=At1g72740 PE=2 SV=1//1.40816e-51
MS.gene074309	MS.gene074309	chr6.2:12891854-12961955	747	0.0584455	0.038391	0	0.507303	0.507303	0.038391	0	0.0584455	0.601464	-13.196	4.20277	-9.67668	0.74976	0.000107169	0.0468413	0.00355461	1	0.0286176	0.939583	0.269813	gnl|BL_ORD_ID|17668 sp|Q75KD7|AOC_ORYSJ Allene oxide cyclase, chloroplastic OS=Oryza sativa subsp. japonica OX=39947 GN=AOC PE=1 SV=1//2.32728e-75
MS.gene070219	MS.gene070219	33281:1112-7722	636	0.273983	0.0432135	0	0.200436	0.200436	0.0432135	0	0.273983	2.66262	-9.21633	2.50109	-9.45452	0.278651	0.000170849	0.186395	0.00360432	1	0.0395176	1	0.271821	gnl|BL_ORD_ID|28003 sp|Q9M1S3|ARP1_ARATH Probable RNA-binding protein ARP1 OS=Arabidopsis thaliana OX=3702 GN=ARP1 PE=2 SV=1//8.8387e-09
MS.gene69141	MS.gene69141	chr8.2:16315712-16316692	591	1.80705	3.82159	0	1.73403	1.73403	3.82159	0	1.80705	-1.1146	-9.57515	-0.904178	-9.42591	0.523197	5.55303e-05	0.452501	0.00373711	1	0.0185155	1	0.277718	gnl|BL_ORD_ID|347608 sp|Q9SD82|RFA1B_ARATH Replication protein A 70 kDa DNA-binding subunit B OS=Arabidopsis thaliana OX=3702 GN=RPA1B PE=3 SV=1//4.11616e-83
MS.gene013126	MS.gene013126	chr3.1:79603029-79603777	579	2.30869	1.79697	0	5.12702	5.12702	1.79697	0	2.30869	0.265378	-10.7435	1.67081	-9.38933	0.915291	1.31025e-06	0.355612	0.00388645	1	0.000906504	1	0.284915	gnl|BL_ORD_ID|41821 sp|Q41001|BCP_PEA Blue copper protein OS=Pisum sativum OX=3888 PE=2 SV=1//5.4331e-61
MS.gene53808	-	chr7.1:67477689-67725322	342	0.289176	0.214145	0.0100905	1.16633	1.16633	0.214145	0.0100905	0.289176	0.368604	-6.69687	2.60767	-4.47432	0.798571	2.13328e-05	0.066623	0.00408211	1	0.00893679	1	0.292905	-//-
MS.gene57591	MS.gene57591	chr2.2:50692869-50696010	469	0.585679	0.544635	0	0.467488	0.467488	0.544635	0	0.585679	0.149253	-9.37027	0.0811977	-9.52225	0.95252	0.000105612	0.97307	0.00412945	1	0.0284348	1	0.29469	gnl|BL_ORD_ID|107511 sp|Q54EY1|DTD_DICDI D-aminoacyl-tRNA deacylase OS=Dictyostelium discoideum OX=44689 GN=dtd PE=3 SV=1//1.82995e-48
MS.gene33980	MS.gene33980	chr1.4:74687465-74691326	1668	13.6051	11.4311	2.48713	25.0224	25.0224	11.4311	2.48713	13.6051	0.251944	-3.55228	1.39769	-2.43454	0.784176	0.000114763	0.149629	0.00422116	1	0.0298093	1	0.298211	gnl|BL_ORD_ID|64476 sp|Q67XD9|CINV2_ARATH Alkaline/neutral invertase CINV2 OS=Arabidopsis thaliana OX=3702 GN=CINV2 PE=1 SV=1//0
MS.gene36379	MS.gene36379	chr2.2:2604293-2605321	579	1.66275	1.97652	0	1.54975	1.54975	1.97652	0	1.66275	-0.20269	-9.4841	-0.0506249	-9.41347	0.938669	7.07372e-05	0.982942	0.00461704	1	0.021356	1	0.314777	gnl|BL_ORD_ID|199457 sp|Q9SSM3|JAL19_ARATH Jacalin-related lectin 19 OS=Arabidopsis thaliana OX=3702 GN=JAL19 PE=2 SV=1//1.78513e-77
MS.gene060835	MS.gene060835	chr4.3:83469653-83475424	1155	0.0827115	0	0	0.282052	0.282052	0	0	0.0827115	7.59191	-9.5009	9.49886	-7.60917	0.00746612	0.000157367	0.000286627	0.0049484	0.519743	0.0371776	0.0557782	0.327803	gnl|BL_ORD_ID|98878 sp|P9WMS1|DHMA2_MYCTU Haloalkane dehalogenase 2 OS=Mycobacterium tuberculosis (strain ATCC 25618 / H37Rv) OX=83332 GN=dhmA2 PE=1 SV=1//1.58912e-12
MS.gene002435	MS.gene002435	chr2.4:71072065-71076250	1461	0.347369	0.963134	0	0.777442	0.777442	0.963134	0	0.347369	-1.53511	-10.5081	-0.111088	-9.13919	0.382377	3.01537e-06	0.929708	0.00500109	1	0.00183098	1	0.329801	gnl|BL_ORD_ID|429238 sp|Q9LUQ3|SDE5_ARATH Putative nuclear RNA export factor SDE5 OS=Arabidopsis thaliana OX=3702 GN=SDE5 PE=4 SV=1//1.02614e-78
MS.gene69906	-	chr1.4:66191045-66219639	4833	1.06741	2.69446	0.152265	2.1872	2.1872	2.69446	0.152265	1.06741	-1.62885	-4.62993	-0.0404488	-3.0545	0.114127	7.09496e-06	0.965999	0.00505983	1	0.00369834	1	0.332455	gnl|BL_ORD_ID|245523 sp|Q9VLT1|MON2_DROME Protein MON2 homolog OS=Drosophila melanogaster OX=7227 GN=mon2 PE=2 SV=4//7.37305e-108
MS.gene35577	MS.gene35577	chr3.3:64395168-64396070	903	54.4992	28.4799	9.0919	136.79	136.79	28.4799	9.0919	54.4992	0.870398	-4.11762	2.44791	-2.55889	0.36569	4.4338e-05	0.0182304	0.00524892	1	0.0156252	0.6291	0.33944	gnl|BL_ORD_ID|124257 sp|Q9ZPE7|EXO_ARATH Protein EXORDIUM OS=Arabidopsis thaliana OX=3702 GN=EXO PE=2 SV=1//1.48965e-140
MS.gene40070	MS.gene40070	chr5.3:874558-878032	1225	0.393668	0.151461	0	1.63813	1.63813	0.151461	0	0.393668	1.25661	-11.3068	3.57126	-9.04827	0.607548	2.15898e-06	0.061743	0.00546693	1	0.00138073	1	0.348079	gnl|BL_ORD_ID|482935 sp|O50046|TRPB_CAMAC Tryptophan synthase beta chain 2, chloroplastic OS=Camptotheca acuminata OX=16922 GN=TSB PE=2 SV=1//2.02345e-151
MS.gene045036	MS.gene045036	chr7.2:86504809-86507401	2202	28.4952	33.928	5.61427	52.1264	52.1264	33.928	5.61427	28.4952	-0.314898	-3.43588	0.80038	-2.33312	0.743994	0.000190956	0.428247	0.00547675	1	0.042701	1	0.348484	gnl|BL_ORD_ID|107077 sp|Q9SZ66|DSC1_ARATH Disease resistance-like protein DSC1 OS=Arabidopsis thaliana OX=3702 GN=DSC1 PE=1 SV=1//5.53823e-31
MS.gene024592	MS.gene024592	chr7.2:2721776-2723518	333	0.765805	0.95086	0	1.43604	1.43604	0.95086	0	0.765805	-0.296177	-10.1361	0.893296	-9.01984	0.906665	1.43132e-05	0.630987	0.00565243	1	0.00657523	1	0.355806	gnl|BL_ORD_ID|410132 sp|Q8LC83|RS242_ARATH 40S ribosomal protein S24-2 OS=Arabidopsis thaliana OX=3702 GN=RPS24B PE=2 SV=2//1.7577e-43
MS.gene040566	MS.gene040566	chr2.3:26832953-26840774	1758	0.0627595	0.133381	0	0.310186	0.310186	0.133381	0	0.0627595	-1.01836	-10.0927	1.51322	-7.63691	0.623978	1.52161e-05	0.412421	0.00615323	1	0.00689293	1	0.37131	gnl|BL_ORD_ID|5819 sp|Q84MB3|ACCH1_ARATH 1-aminocyclopropane-1-carboxylate oxidase homolog 1 OS=Arabidopsis thaliana OX=3702 GN=At1g06620 PE=2 SV=1//1.11033e-57
MS.gene69445	MS.gene69445	chr3.3:92767394-92770914	1767	0.390548	0.245111	0	0.803583	0.803583	0.245111	0	0.390548	0.616102	-10.3045	1.89958	-9.09129	0.750027	1.27291e-05	0.162085	0.00635272	1	0.00589495	1	0.376352	gnl|BL_ORD_ID|326023 sp|Q9M390|PTR1_ARATH Protein NRT1/ PTR FAMILY 8.1 OS=Arabidopsis thaliana OX=3702 GN=NPF8.1 PE=1 SV=1//1.04099e-178
MS.gene042752	MS.gene042752	chr6.1:60815799-60819997	1653	0.318613	0.39583	0	0.3721	0.3721	0.39583	0	0.318613	-0.374678	-9.44756	0.0716917	-9.05955	0.881927	8.47303e-05	0.974455	0.00654307	1	0.0243334	1	0.382055	gnl|BL_ORD_ID|478695 sp|Q6Q3H3|TPSGD_VITVI (-)-germacrene D synthase OS=Vitis vinifera OX=29760 GN=VIT_19s0014g04930 PE=1 SV=1//0
MS.gene021723	-	chr7.4:88423523-88431489	2253	26.0669	31.3282	5.47532	48.6037	48.6037	31.3282	5.47532	26.0669	-0.336214	-3.3591	0.788708	-2.2469	0.738199	0.000203769	0.450252	0.00687405	1	0.0448632	1	0.392519	gnl|BL_ORD_ID|529555 sp|O82500|Y4117_ARATH Putative disease resistance protein At4g11170 OS=Arabidopsis thaliana OX=3702 GN=At4g11170 PE=2 SV=1//5.49512e-30
MS.gene003014	MS.gene003014	chr2.2:61697587-61702816	762	0.221731	0.737095	0	0.583493	0.583493	0.737095	0	0.221731	-1.71539	-10.4147	-0.0396691	-8.81444	0.47743	4.20489e-06	0.985333	0.00706234	1	0.00241214	1	0.399169	gnl|BL_ORD_ID|180573 sp|P46608|HSBH1_SOYBN Homeobox protein SBH1 OS=Glycine max OX=3847 GN=H1 PE=2 SV=1//8.50119e-151
MS.gene062683	MS.gene062683	chr6.4:45638212-45641913	1671	0.164498	0.857869	0	0.60431	0.60431	0.857869	0	0.164498	-2.1321	-9.40485	-0.172074	-7.50226	0.30658	0.000200508	0.933556	0.0072018	1	0.044359	1	0.403826	gnl|BL_ORD_ID|478619 sp|B9SCB6|TPS2_RICCO Probable terpene synthase 2 OS=Ricinus communis OX=3988 GN=TPS2 PE=3 SV=1//0
MS.gene70788	MS.gene70788	chr1.2:60801813-60806408	1128	0.077294	0.558129	0	0.325325	0.325325	0.558129	0	0.077294	-2.85518	-9.39887	-0.601749	-7.1987	0.0767726	0.000128199	0.690083	0.00804786	1	0.0323064	1	0.429621	gnl|BL_ORD_ID|142935 sp|Q39111|GAOX2_ARATH Gibberellin 20 oxidase 2 OS=Arabidopsis thaliana OX=3702 GN=GA20OX2 PE=2 SV=1//1.46713e-133
MS.gene66319	MS.gene66319	chr6.4:63421549-63424457	552	6.65853	5.66221	0.748774	10.3335	10.3335	5.66221	0.748774	6.65853	0.138151	-4.00861	1.02677	-3.12167	0.929518	0.00015051	0.488182	0.00830118	1	0.036134	1	0.436176	-//-
MS.gene002615	MS.gene002615	chr2.1:69084001-69085793	1605	0.572201	1.00798	0	0.7247	0.7247	1.00798	0	0.572201	-0.843938	-9.19361	-0.229686	-8.6386	0.634278	0.000219438	0.865389	0.00837912	1	0.0474858	1	0.437707	gnl|BL_ORD_ID|311954 sp|Q9LEQ7|PP382_ARATH Pentatricopeptide repeat-containing protein At5g14820, mitochondrial OS=Arabidopsis thaliana OX=3702 GN=At5g14820 PE=2 SV=1//0
MS.gene68728	MS.gene68728	chr3.2:93191758-93193216	1023	0.761242	1.2162	0	2.85533	2.85533	1.2162	0	0.761242	-0.730745	-10.8665	1.39714	-8.79629	0.723149	8.24797e-07	0.343893	0.00861891	1	0.000609424	1	0.445454	gnl|BL_ORD_ID|81607 sp|O64862|CTU1_ARATH Cytoplasmic tRNA 2-thiolation protein 1 OS=Arabidopsis thaliana OX=3702 GN=NCS6 PE=2 SV=2//0
XLOC_196001	XLOC_196001	chr5.2:53612748-53615319	1978	0.430632	0.751787	0	1.32207	1.32207	0.751787	0	0.430632	-0.747793	-10.5688	1.10957	-8.79629	0.762206	4.1539e-06	0.547574	0.00862114	1	0.00238889	1	0.445471	-
MS.gene07606	MS.gene07606	chr1.4:64518344-64525810	1383	0.12611	0.514432	0	0.625554	0.625554	0.514432	0	0.12611	-2.00453	-11.0356	0.579294	-8.52179	0.408086	9.27758e-06	0.766347	0.00948817	1	0.00454547	1	0.471507	gnl|BL_ORD_ID|124211 sp|Q9Y3B2|EXOS1_HUMAN Exosome complex component CSL4 OS=Homo sapiens OX=9606 GN=EXOSC1 PE=1 SV=1//1.86873e-35
MS.gene029145	MS.gene029145	chr1.2:85097665-85098391	492	1.29693	0.795921	0	2.83148	2.83148	0.795921	0	1.29693	0.728216	-9.85181	2.11596	-8.5445	0.769739	2.61014e-05	0.248187	0.0110316	1	0.0104135	1	0.509646	gnl|BL_ORD_ID|80253 sp|B9HTK2|CSPLI_POPTR CASP-like protein 4C2 OS=Populus trichocarpa OX=3694 GN=POPTRDRAFT_822486 PE=3 SV=1//2.23633e-64
MS.gene045316	MS.gene045316	chr3.1:64967396-64973852	1502	0.046095	0.331399	0	0.335782	0.335782	0.331399	0	0.046095	-2.7921	-9.92323	0.250329	-6.94838	0.0430198	3.00668e-05	0.84597	0.0116895	1	0.011635	1	0.525483	gnl|BL_ORD_ID|78730 sp|P28553|CRTI_SOYBN Phytoene dehydrogenase, chloroplastic/chromoplastic OS=Glycine max OX=3847 GN=PDS1 PE=2 SV=1//0
MS.gene82940	MS.gene82940	chr8.1:33225430-33227952	1401	65.9076	49.4869	16.1599	228.806	228.806	49.4869	16.1599	65.9076	0.356411	-4.0408	2.40373	-2.00929	0.680137	1.64136e-05	0.0119876	0.0131313	1	0.00729661	0.508732	0.560538	gnl|BL_ORD_ID|4043 sp|Q949P1|ABAH1_ARATH Abscisic acid 8&apos;-hydroxylase 1 OS=Arabidopsis thaliana OX=3702 GN=CYP707A1 PE=2 SV=1//0
MS.gene41470	MS.gene41470	chr3.1:52068877-52080431	5073	0.522695	1.33076	0.006965	2.37059	2.37059	1.33076	0.006965	0.522695	-1.68304	-9.15537	0.975442	-6.47321	0.34978	1.07598e-09	0.364491	0.0131467	1	1.79313e-06	1	0.560988	gnl|BL_ORD_ID|106633 sp|Q9T048|DRL27_ARATH Disease resistance protein At4g27190 OS=Arabidopsis thaliana OX=3702 GN=At4g27190 PE=2 SV=1//5.63435e-49
MS.gene05958	MS.gene05958	chr4.3:2625260-2627792	912	0.321631	0.214271	0	0.5131	0.5131	0.214271	0	0.321631	0.633072	-9.198	1.56375	-8.34836	0.8037	0.000151815	0.4057	0.0134167	1	0.0363709	1	0.568432	gnl|BL_ORD_ID|311630 sp|Q84WJ9|PP1R7_ARATH Protein phosphatase 1 regulatory inhibitor subunit PPP1R7 homolog OS=Arabidopsis thaliana OX=3702 GN=At5g19680 PE=1 SV=1//8.74492e-158
MS.gene030214	MS.gene030214	chr8.2:9081196-9081958	429	0.892425	0.947619	0	2.5368	2.5368	0.947619	0	0.892425	-0.0725224	-9.75933	1.70115	-8.06423	0.97802	4.04419e-05	0.363181	0.0149325	1	0.0146328	1	0.604781	gnl|BL_ORD_ID|43387 sp|F4IXW2|BIG5_ARATH Brefeldin A-inhibited guanine nucleotide-exchange protein 5 OS=Arabidopsis thaliana OX=3702 GN=BIG5 PE=1 SV=2//3.65199e-28
MS.gene36768	MS.gene36768	chr8.2:78978284-78982237	1674	0.187434	1.11195	0	0.708915	0.708915	1.11195	0	0.187434	-2.56833	-10.2902	-0.411947	-8.21069	0.145368	7.88332e-06	0.726506	0.015283	1	0.00397321	1	0.610967	gnl|BL_ORD_ID|168598 sp|Q852L0|HD16N_ORYSJ Casein kinase 1-like protein HD16 OS=Oryza sativa subsp. japonica OX=39947 GN=HD16 PE=1 SV=1//0
MS.gene02466	MS.gene02466	chr4.4:25232287-25237719	1152	0.13278	2.96286	0	2.46563	2.46563	2.96286	0	0.13278	-4.52313	-12.5534	-0.101721	-8.18152	0.0827472	0.000188377	0.96838	0.0159359	1	0.042207	1	0.626057	gnl|BL_ORD_ID|87706 sp|O81155|CYSKP_SOLTU Cysteine synthase, chloroplastic/chromoplastic OS=Solanum tuberosum OX=4113 PE=2 SV=1//0
MS.gene36863	MS.gene36863	chr8.4:64171050-64177607	1098	0.0991655	0.301269	0	0.181938	0.181938	0.301269	0	0.0991655	-1.6591	-9.05918	-0.534174	-7.98798	0.35569	0.000214882	0.690684	0.0162689	1	0.0467171	1	0.632489	gnl|BL_ORD_ID|59856 sp|O80842|CFTSY_ARATH Cell division protein FtsY homolog, chloroplastic OS=Arabidopsis thaliana OX=3702 GN=CPFTSY PE=1 SV=2//0
MS.gene68606	MS.gene68606	chr8.1:7840871-7844467	1929	0.522152	0.822128	0.004554	1.23986	1.23986	0.822128	0.004554	0.522152	-0.71781	-7.85591	0.75506	-6.36729	0.772334	7.52534e-06	0.678231	0.0164176	1	0.0038784	1	0.635413	gnl|BL_ORD_ID|40511 sp|Q9ASW1|B3GTG_ARATH Hydroxyproline O-galactosyltransferase GALT3 OS=Arabidopsis thaliana OX=3702 GN=GALT3 PE=2 SV=1//0
MS.gene66824	MS.gene66824	chr4.4:51824460-51826190	1251	0.358185	0.0037195	0	0.782752	0.782752	0.0037195	0	0.358185	5.66996	-9.25364	7.05235	-7.92801	0.0459402	0.000143173	0.000842096	0.0171174	1	0.0349981	0.116291	0.650779	gnl|BL_ORD_ID|223578 sp|Q9SJF1|LSG12_ARATH GTPase LSG1-2 OS=Arabidopsis thaliana OX=3702 GN=LSG1-2 PE=1 SV=1//0
MS.gene015133	MS.gene015133	chr5.1:9815291-9823821	1995	0.0373535	2.60244	0	2.4544	2.4544	2.60244	0	0.0373535	-6.14879	-13.187	0.0765108	-7.01694	0.00886098	3.01549e-12	0.967088	0.0174482	0.56918	1.20785e-08	1	0.658142	gnl|BL_ORD_ID|430132 sp|Q93YU5|SEC8_ARATH Exocyst complex component SEC8 OS=Arabidopsis thaliana OX=3702 GN=SEC8 PE=1 SV=1//0
XLOC_158581	XLOC_158581	chr4.2:29767691-29773756	6066	0.070419	0.433024	0	0.388755	0.388755	0.433024	0	0.070419	-2.6438	-10.041	0.0751161	-7.40105	0.110652	2.49459e-05	0.952448	0.0206026	1	0.0100627	1	0.719924	-
MS.gene056571	-	chr8.2:31863301-31868014	1198	54.2723	51.8541	13.2599	166.504	166.504	51.8541	13.2599	54.2723	0.0338283	-3.66287	1.86704	-1.84298	0.969769	6.10847e-05	0.0532933	0.0207953	1	0.019412	0.987441	0.72509	gnl|BL_ORD_ID|4049 sp|Q9FH76|ABAH3_ARATH Abscisic acid 8&apos;-hydroxylase 3 OS=Arabidopsis thaliana OX=3702 GN=CYP707A3 PE=1 SV=1//0
MS.gene039527	MS.gene039527	chr3.1:8069407-8073808	1869	0.134707	0.942921	0	0.271828	0.271828	0.942921	0	0.134707	-2.78566	-9.07094	-1.5215	-7.88839	0.125178	0.000208738	0.241256	0.0213357	1	0.0456928	1	0.733719	gnl|BL_ORD_ID|78325 sp|Q8GYA4|CRK10_ARATH Cysteine-rich receptor-like protein kinase 10 OS=Arabidopsis thaliana OX=3702 GN=CRK10 PE=1 SV=3//3.06193e-132
MS.gene060630	-	chr2.2:16832207-16859500	696	0.271846	0.100897	0.009168	0.513865	0.513865	0.100897	0.009168	0.271846	1.39606	-5.95671	2.58902	-4.78606	0.447266	5.64689e-05	0.043271	0.0229614	1	0.0186294	0.911298	0.761131	gnl|BL_ORD_ID|138230 sp|Q9SY66|FRS11_ARATH Protein FAR1-RELATED SEQUENCE 11 OS=Arabidopsis thaliana OX=3702 GN=FRS11 PE=1 SV=1//3.85342e-13
MS.gene48766	MS.gene48766	chr4.4:73046645-73047196	552	6.20689	27.9332	0.651941	21.0311	21.0311	27.9332	0.651941	6.20689	-2.22621	-5.18974	-0.209163	-3.18033	0.0602156	1.83403e-05	0.834965	0.023591	1	0.0079456	1	0.772911	-//-
MS.gene35751	MS.gene35751	chr2.1:12604321-12606599	690	0.216106	0.383379	0	0.890342	0.890342	0.383379	0	0.216106	-0.883021	-9.83224	1.38799	-7.60954	0.64238	8.12448e-05	0.338063	0.0236359	1	0.0236296	1	0.77323	gnl|BL_ORD_ID|493906 sp|P26291|UCRIA_PEA Cytochrome b6-f complex iron-sulfur subunit, chloroplastic OS=Pisum sativum OX=3888 GN=petC PE=2 SV=1//1.00041e-138
MS.gene043919	-	chr5.3:50736832-50741994	846	15.8231	12.3327	3.32925	50.5674	50.5674	12.3327	3.32925	15.8231	0.224794	-3.80041	2.15588	-1.88365	0.817715	5.90159e-05	0.0387544	0.0273781	1	0.0190312	0.875761	0.830901	gnl|BL_ORD_ID|124257 sp|Q9ZPE7|EXO_ARATH Protein EXORDIUM OS=Arabidopsis thaliana OX=3702 GN=EXO PE=2 SV=1//4.10655e-110
MS.gene022217	MS.gene022217	chr3.3:66972945-66976536	1755	0.117331	0.349005	0	0.374059	0.374059	0.349005	0	0.117331	-1.57559	-9.23522	0.32884	-7.38995	0.375103	0.000139428	0.801399	0.0297365	1	0.0343337	1	0.861011	gnl|BL_ORD_ID|107077 sp|Q9SZ66|DSC1_ARATH Disease resistance-like protein DSC1 OS=Arabidopsis thaliana OX=3702 GN=DSC1 PE=1 SV=1//5.25821e-102
MS.gene043925	-	chr5.3:50512888-50734028	924	9.4247	19.6295	1.96575	48.9671	48.9671	19.6295	1.96575	9.4247	-1.14216	-4.96679	1.49987	-2.33122	0.34543	4.77974e-06	0.200472	0.0305333	1	0.00264232	1	0.869746	gnl|BL_ORD_ID|428681 sp|Q8LGI2|SCPDL_ARATH Probable mitochondrial saccharopine dehydrogenase-like oxidoreductase At5g39410 OS=Arabidopsis thaliana OX=3702 GN=At5g39410 PE=1 SV=2//6.30734e-28
MS.gene25823	MS.gene25823	chr3.2:70228496-70232488	909	0.109675	0.54491	0	0.596414	0.596414	0.54491	0	0.109675	-2.31503	-10.0575	0.345982	-7.47282	0.200202	2.81311e-05	0.786446	0.0316869	1	0.0110927	1	0.884875	gnl|BL_ORD_ID|421964 sp|Q69KJ0|RTL3_ORYSJ Ribonuclease 3-like protein 3 OS=Oryza sativa subsp. japonica OX=39947 GN=Os06g0358800 PE=2 SV=1//1.88511e-76
MS.gene56006	MS.gene56006	chr2.3:56366291-56371676	408	0.081052	0.266431	0	0.463084	0.463084	0.266431	0	0.081052	-1.75001	-10.126	0.960025	-7.47282	0.483648	1.17286e-05	0.60414	0.0316873	1	0.00548729	1	0.884875	gnl|BL_ORD_ID|110230 sp|P23535|E13B_PHAVU Glucan endo-1,3-beta-glucosidase, basic isoform OS=Phaseolus vulgaris OX=3885 PE=2 SV=1//2.28912e-52
MS.gene068434	-	chr6.3:64274570-64355415	1008	0.244219	0.881416	0	2.70015	2.70015	0.881416	0	0.244219	-1.88543	-10.9808	1.7753	-7.37317	0.448683	7.67377e-07	0.32702	0.0350259	1	0.000570691	1	0.926672	gnl|BL_ORD_ID|39426 sp|Q9FMB4|AUG5_ARATH AUGMIN subunit 5 OS=Arabidopsis thaliana OX=3702 GN=AUG5 PE=1 SV=1//1.1613e-14
MS.gene07298	MS.gene07298	chr1.2:65390573-65399370	2412	1.49009	1.02453	0.037904	2.34742	2.34742	1.02453	0.037904	1.49009	0.544394	-6.19665	1.48593	-5.27586	0.784009	9.5038e-05	0.261887	0.0354007	1	0.026333	1	0.930243	gnl|BL_ORD_ID|124433 sp|Q9ZSM8|EZA1_ARATH Histone-lysine N-methyltransferase EZA1 OS=Arabidopsis thaliana OX=3702 GN=EZA1 PE=1 SV=1//0
MS.gene029020	MS.gene029020	chr2.3:11744283-11744602	243	22.2387	15.6878	4.43629	118.152	118.152	15.6878	4.43629	22.2387	0.435847	-4.93398	3.0875	-2.29729	0.705178	7.71978e-06	0.00753691	0.0394547	1	0.00392545	0.403307	0.976805	gnl|BL_ORD_ID|52143 sp|O81831|CARP1_ARATH Calcium-binding protein KRP1 OS=Arabidopsis thaliana OX=3702 GN=KRP1 PE=2 SV=1//6.555e-18
MS.gene062421	MS.gene062421	chr7.3:75210315-75211940	702	0.928841	3.85678	0.0690165	5.98565	5.98565	3.85678	0.0690165	0.928841	-2.11527	-6.55365	0.797486	-3.64454	0.188	5.82255e-05	0.582674	0.041347	1	0.0189447	1	0.996627	-//-
MS.gene008432	MS.gene008432	chr3.3:56745570-56747097	945	0.0775075	0	0	0.892163	0.892163	0	0	0.0775075	5.55525	-9.25097	9.24553	-5.57377	0.247405	0.000139604	0.000271342	0.235445	1	0.0343337	0.0533576	1	gnl|BL_ORD_ID|5858 sp|Q9MB94|ACCO_PRUMU 1-aminocyclopropane-1-carboxylate oxidase OS=Prunus mume OX=102107 GN=ACO1 PE=2 SV=1//8.17893e-180
MS.gene88659	MS.gene88659	chr8.1:4389062-4390135	819	2.9661	0.652308	2.18727	35.9385	35.9385	0.652308	2.18727	2.9661	2.21988	-4.24551	6.06881	-0.436462	0.370714	4.80034e-05	0.000398498	0.808927	1	0.0165806	0.0707028	1	gnl|BL_ORD_ID|512101 sp|Q38910|XTH23_ARATH Probable xyloglucan endotransglucosylase/hydrolase protein 23 OS=Arabidopsis thaliana OX=3702 GN=XTH23 PE=2 SV=1//2.23827e-126
MS.gene058674	-	chr7.4:26839766-26843800	1290	0.831212	0.375412	0.333187	6.1301	6.1301	0.375412	0.333187	0.831212	1.0654	-4.45941	4.25312	-1.28542	0.432334	7.00067e-05	0.000641616	0.291288	1	0.0212909	0.0980557	1	gnl|BL_ORD_ID|480 sp|Q9MB95|1A11_PRUMU 1-aminocyclopropane-1-carboxylate synthase 1 OS=Prunus mume OX=102107 GN=ACS1 PE=2 SV=1//0
MS.gene22605	MS.gene22605	chr5.1:4564793-4565437	645	14.7457	11.5045	6.91507	99.2903	99.2903	11.5045	6.91507	14.7457	0.321347	-4.05131	3.32447	-1.07091	0.740798	0.000132637	0.000943567	0.291069	1	0.0331321	0.124642	1	gnl|BL_ORD_ID|106417 sp|Q9SGJ6|DRE1E_ARATH Dehydration-responsive element-binding protein 1E OS=Arabidopsis thaliana OX=3702 GN=DREB1E PE=2 SV=1//2.37732e-40
MS.gene017867	MS.gene017867	chr7.3:17879921-17881198	1278	8.70232	6.42471	3.93832	79.8078	79.8078	6.42471	3.93832	8.70232	0.374832	-4.54695	3.81559	-1.12327	0.725745	5.80612e-05	0.00107387	0.274947	1	0.0189447	0.134734	1	gnl|BL_ORD_ID|308626 sp|Q5NDE4|PMGT2_TAKRU Protein O-linked-mannose beta-1,4-N-acetylglucosaminyltransferase 2 OS=Takifugu rubripes OX=31033 GN=pomgnt2 PE=2 SV=1//2.0413e-06
MS.gene015522	MS.gene015522	chr5.4:5517700-5518344	645	18.4464	22.5011	13.1072	191.736	191.736	22.5011	13.1072	18.4464	-0.336122	-4.08114	3.28872	-0.474921	0.724393	6.08993e-05	0.00128399	0.611305	1	0.019412	0.149588	1	gnl|BL_ORD_ID|106417 sp|Q9SGJ6|DRE1E_ARATH Dehydration-responsive element-binding protein 1E OS=Arabidopsis thaliana OX=3702 GN=DREB1E PE=2 SV=1//2.37732e-40
MS.gene35576	MS.gene35576	chr3.3:64410623-64411537	915	15.1665	6.80162	4.82411	54.2325	54.2325	6.80162	4.82411	15.1665	1.10143	-3.71622	3.19321	-1.63775	0.270024	0.000117339	0.00211938	0.0786693	1	0.0303741	0.201596	1	gnl|BL_ORD_ID|124257 sp|Q9ZPE7|EXO_ARATH Protein EXORDIUM OS=Arabidopsis thaliana OX=3702 GN=EXO PE=2 SV=1//1.73846e-141
MS.gene070454	MS.gene070454	chr3.3:25074871-25081103	930	2.98471	2.78008	2.27602	26.2562	26.2562	2.78008	2.27602	2.98471	0.0407532	-3.72932	3.4076	-0.378913	0.96937	0.000125641	0.00214535	0.679267	1	0.0319082	0.202781	1	gnl|BL_ORD_ID|491180 sp|Q337C0|U496D_ORYSJ UPF0496 protein 4 OS=Oryza sativa subsp. japonica OX=39947 GN=Os10g0513300 PE=2 SV=1//1.95081e-13
MS.gene51230	-	chr7.3:28119138-28123207	1140	0.556492	0.368554	0.228652	5.51561	5.51561	0.368554	0.228652	0.556492	0.453692	-4.71789	3.98445	-1.20161	0.757288	0.000120205	0.00233529	0.366481	1	0.0308711	0.212133	1	gnl|BL_ORD_ID|484 sp|P18485|1A12_SOLLC 1-aminocyclopropane-1-carboxylate synthase 2 OS=Solanum lycopersicum OX=4081 GN=ACS2 PE=1 SV=2//1.07834e-170
MS.gene072829	MS.gene072829	chr5.3:4579439-4580083	645	6.28923	7.67655	4.30764	56.614	56.614	7.67655	4.30764	6.28923	-0.324821	-3.92554	3.08678	-0.534788	0.771746	0.000165519	0.00273876	0.632802	1	0.0386403	0.232582	1	gnl|BL_ORD_ID|106417 sp|Q9SGJ6|DRE1E_ARATH Dehydration-responsive element-binding protein 1E OS=Arabidopsis thaliana OX=3702 GN=DREB1E PE=2 SV=1//3.10441e-40
MS.gene025813	-	chr5.3:5843156-5922294	1293	2.70169	2.71526	1.90144	18.2728	18.2728	2.71526	1.90144	2.70169	-0.0223356	-3.84122	3.25229	-0.58224	0.990076	0.000172489	0.0030277	0.598414	1	0.0396193	0.246601	1	gnl|BL_ORD_ID|164979 sp|Q8VZP6|GUX8_ARATH Putative glucuronosyltransferase PGSIP8 OS=Arabidopsis thaliana OX=3702 GN=PGSIP8 PE=2 SV=1//0
MS.gene015523	MS.gene015523	chr5.4:5514440-5515135	696	12.253	13.5731	5.5408	108.607	108.607	13.5731	5.5408	12.253	-0.209304	-4.49476	3.18351	-1.12094	0.843204	2.94205e-05	0.00323742	0.285579	1	0.0114042	0.257926	1	gnl|BL_ORD_ID|106420 sp|Q9LN86|DRE1F_ARATH Dehydration-responsive element-binding protein 1F OS=Arabidopsis thaliana OX=3702 GN=DREB1F PE=2 SV=1//1.83035e-43
XLOC_324658	XLOC_324658	chr8.4:34412252-34413561	1310	0.398697	1.01016	0.120784	16.2427	16.2427	1.01016	0.120784	0.398697	-1.3541	-7.24228	4.19039	-1.70803	0.329059	5.30384e-06	0.00337776	0.25374	1	0.00288318	0.263445	1	-
MS.gene93972	MS.gene93972	chr6.2:73813191-73814507	1317	12.5769	9.55333	5.05695	81.4541	81.4541	9.55333	5.05695	12.5769	0.33191	-4.21168	3.26825	-1.29539	0.756493	8.72753e-05	0.00384885	0.198181	1	0.0247837	0.283046	1	gnl|BL_ORD_ID|326263 sp|Q5PNY6|PUB21_ARATH U-box domain-containing protein 21 OS=Arabidopsis thaliana OX=3702 GN=PUB21 PE=2 SV=1//1.51612e-103
MS.gene22606	MS.gene22606	chr5.1:4561106-4561801	696	17.5241	16.4697	5.21036	127.688	127.688	16.4697	5.21036	17.5241	0.0291352	-4.81875	3.13597	-1.72972	0.978606	7.26727e-06	0.00444284	0.0925243	1	0.00376238	0.305366	1	gnl|BL_ORD_ID|106420 sp|Q9LN86|DRE1F_ARATH Dehydration-responsive element-binding protein 1F OS=Arabidopsis thaliana OX=3702 GN=DREB1F PE=2 SV=1//1.83035e-43
MS.gene072828	MS.gene072828	chr5.3:4576181-4576876	696	16.0799	15.1562	4.68591	114.06	114.06	15.1562	4.68591	16.0799	0.0235098	-4.81039	3.09254	-1.75927	0.983055	8.50238e-06	0.00505963	0.0925272	1	0.00422001	0.328287	1	gnl|BL_ORD_ID|106420 sp|Q9LN86|DRE1F_ARATH Dehydration-responsive element-binding protein 1F OS=Arabidopsis thaliana OX=3702 GN=DREB1F PE=2 SV=1//1.83035e-43
MS.gene035695	MS.gene035695	chr8.4:5950836-5951934	885	20.1941	16.627	8.25703	127.647	127.647	16.627	8.25703	20.1941	0.211762	-4.15828	3.11655	-1.27106	0.839504	3.80858e-05	0.00548073	0.169141	1	0.0139351	0.342514	1	gnl|BL_ORD_ID|512101 sp|Q38910|XTH23_ARATH Probable xyloglucan endotransglucosylase/hydrolase protein 23 OS=Arabidopsis thaliana OX=3702 GN=XTH23 PE=2 SV=1//5.97999e-146
MS.gene011671	MS.gene011671	chr8.3:22822652-22824436	1002	2.17966	1.65643	1.22478	15.1948	15.1948	1.65643	1.22478	2.17966	0.323917	-3.86001	3.36496	-0.826265	0.799109	0.000131948	0.00567304	0.451723	1	0.033003	0.349268	1	gnl|BL_ORD_ID|43136 sp|Q9T072|BH025_ARATH Transcription factor bHLH25 OS=Arabidopsis thaliana OX=3702 GN=BHLH25 PE=2 SV=2//3.30512e-51
MS.gene024371	MS.gene024371	chr7.2:160257-161117	861	2.8745	4.75302	2.80573	36.9138	36.9138	4.75302	2.80573	2.8745	-0.777431	-3.92409	3.13759	-0.0245951	0.533038	0.000196282	0.00621316	0.987242	1	0.0435931	0.362706	1	gnl|BL_ORD_ID|31994 sp|P0C035|ATL60_ARATH RING-H2 finger protein ATL60 OS=Arabidopsis thaliana OX=3702 GN=ATL60 PE=2 SV=1//1.56148e-24
MS.gene06614	-	chr3.3:77314051-77318507	1275	14.0298	19.1208	7.14665	98.6711	98.6711	19.1208	7.14665	14.0298	-0.356843	-3.56032	2.77133	-0.446706	0.716115	0.00010518	0.00679995	0.604014	1	0.028367	0.381761	1	gnl|BL_ORD_ID|445862 sp|Q8R1R3|STAR7_MOUSE StAR-related lipid transfer protein 7, mitochondrial OS=Mus musculus OX=10090 GN=Stard7 PE=1 SV=2//2.13526e-12
MS.gene035699	MS.gene035699	chr8.4:5973836-5974902	852	6.70851	6.83101	3.00651	59.0301	59.0301	6.83101	3.00651	6.70851	-0.095127	-4.49145	3.28047	-1.13536	0.937382	5.7001e-05	0.00697324	0.309555	1	0.0186948	0.386951	1	gnl|BL_ORD_ID|512101 sp|Q38910|XTH23_ARATH Probable xyloglucan endotransglucosylase/hydrolase protein 23 OS=Arabidopsis thaliana OX=3702 GN=XTH23 PE=2 SV=1//4.97042e-150
MS.gene42544	MS.gene42544	chr7.1:16251800-16253077	1278	6.53113	5.70151	3.08055	39.4397	39.4397	5.70151	3.08055	6.53113	0.132131	-3.8823	2.97072	-1.06209	0.90485	0.000191442	0.0071507	0.302716	1	0.0427678	0.39273	1	gnl|BL_ORD_ID|120266 sp|Q5NDL3|EOGT_CHICK EGF domain-specific O-linked N-acetylglucosamine transferase OS=Gallus gallus OX=9031 GN=EOGT PE=2 SV=2//1.20329e-07
MS.gene90362	MS.gene90362	15084:31201-32375	954	67.0024	74.539	38.7886	475.079	475.079	74.539	38.7886	67.0024	-0.220221	-3.82274	2.85003	-0.769519	0.823073	0.000101414	0.00863768	0.368561	1	0.0276964	0.43353	1	gnl|BL_ORD_ID|510431 sp|Q9SAH7|WRK40_ARATH Probable WRKY transcription factor 40 OS=Arabidopsis thaliana OX=3702 GN=WRKY40 PE=1 SV=1//3.25286e-92
MS.gene011669	MS.gene011669	chr8.3:22869627-22879400	999	11.9647	12.0008	4.76614	65.0515	65.0515	12.0008	4.76614	11.9647	-0.062169	-4.00632	2.62116	-1.33328	0.948342	1.60933e-05	0.0116473	0.103546	1	0.00720452	0.500992	1	gnl|BL_ORD_ID|43133 sp|Q1PF16|BH019_ARATH Transcription factor bHLH19 OS=Arabidopsis thaliana OX=3702 GN=BHLH19 PE=1 SV=1//2.39759e-32
MS.gene24415	MS.gene24415	chr1.1:3709484-3716446	1683	0.5725	0.43646	0.139883	4.05336	4.05336	0.43646	0.139883	0.5725	0.391328	-5.06431	3.48781	-1.99196	0.763524	0.000221443	0.0118636	0.110336	1	0.0476582	0.505495	1	gnl|BL_ORD_ID|445679 sp|Q9Y2H1|ST38L_HUMAN Serine/threonine-protein kinase 38-like OS=Homo sapiens OX=9606 GN=STK38L PE=1 SV=3//3.12296e-140
MS.gene88665	MS.gene88665	chr8.1:4426776-4427842	852	8.66068	7.83503	2.64829	68.9863	68.9863	7.83503	2.64829	8.66068	0.0717668	-4.90491	3.30314	-1.69157	0.955572	6.92733e-06	0.0127915	0.114153	1	0.00363365	0.525585	1	gnl|BL_ORD_ID|512101 sp|Q38910|XTH23_ARATH Probable xyloglucan endotransglucosylase/hydrolase protein 23 OS=Arabidopsis thaliana OX=3702 GN=XTH23 PE=2 SV=1//3.95509e-149
MS.gene44420	-	chr8.1:24693542-24696711	960	6.24692	4.83559	1.22524	32.7352	32.7352	4.83559	1.22524	6.24692	0.408719	-4.51458	2.8394	-2.10364	0.711715	3.08064e-05	0.0132604	0.0462901	1	0.011901	0.535865	1	gnl|BL_ORD_ID|43133 sp|Q1PF16|BH019_ARATH Transcription factor bHLH19 OS=Arabidopsis thaliana OX=3702 GN=BHLH19 PE=1 SV=1//3.44152e-45
MS.gene013631	MS.gene013631	chr3.4:83182263-83183665	1011	2.68839	1.88536	1.06572	16.1625	16.1625	1.88536	1.06572	2.68839	0.437112	-4.12432	3.26074	-1.31673	0.753449	0.000163609	0.0137466	0.263107	1	0.0382727	0.547139	1	gnl|BL_ORD_ID|510446 sp|Q9SUP6|WRK53_ARATH Probable WRKY transcription factor 53 OS=Arabidopsis thaliana OX=3702 GN=WRKY53 PE=1 SV=1//1.49e-39
MS.gene067477	MS.gene067477	chr2.4:553810-554980	954	84.8373	100.511	49.6745	491.366	491.366	100.511	49.6745	84.8373	-0.303731	-3.52794	2.47511	-0.762963	0.741637	8.66551e-05	0.01385	0.331241	1	0.0246997	0.549214	1	gnl|BL_ORD_ID|510431 sp|Q9SAH7|WRK40_ARATH Probable WRKY transcription factor 40 OS=Arabidopsis thaliana OX=3702 GN=WRKY40 PE=1 SV=1//2.56398e-92
MS.gene85463	MS.gene85463	chr7.2:26587139-26590309	1287	0.346644	0.428082	0.0491625	2.63764	2.63764	0.428082	0.0491625	0.346644	-0.304441	-5.84755	2.86622	-2.69706	0.8207	3.20096e-05	0.0179028	0.0704757	1	0.0122827	0.622476	1	gnl|BL_ORD_ID|484 sp|P18485|1A12_SOLLC 1-aminocyclopropane-1-carboxylate synthase 2 OS=Solanum lycopersicum OX=4081 GN=ACS2 PE=1 SV=2//0
MS.gene023978	MS.gene023978	chr7.1:24982138-24986049	1455	0.636563	0.408683	0.433372	6.18044	6.18044	0.408683	0.433372	0.636563	0.558997	-4.03528	4.07539	-0.529777	0.759792	0.000166647	0.0191476	0.653099	1	0.0388242	0.643576	1	gnl|BL_ORD_ID|484 sp|P18485|1A12_SOLLC 1-aminocyclopropane-1-carboxylate synthase 2 OS=Solanum lycopersicum OX=4081 GN=ACS2 PE=1 SV=2//0
XLOC_267080	XLOC_267080	chr7.2:92717961-92718980	1020	1.77273	6.60568	1.0073	45.1391	45.1391	6.60568	1.0073	1.77273	-1.94802	-5.68123	2.95898	-0.787329	0.105268	5.65459e-05	0.0202431	0.542009	1	0.0186294	0.65825	1	-
MS.gene83604	MS.gene83604	chr2.2:1474175-1475355	954	77.4119	118.393	45.2588	502.179	502.179	118.393	45.2588	77.4119	-0.669542	-3.67849	2.27111	-0.757892	0.471168	0.00021978	0.0223716	0.39074	1	0.0474858	0.686334	1	gnl|BL_ORD_ID|510431 sp|Q9SAH7|WRK40_ARATH Probable WRKY transcription factor 40 OS=Arabidopsis thaliana OX=3702 GN=WRKY40 PE=1 SV=1//1.59613e-89
MS.gene74087	-	chr7.4:76504879-76585788	327	0.852175	1.10809	0.310445	5.49228	5.49228	1.10809	0.310445	0.852175	-0.580536	-4.75438	2.68922	-1.49723	0.619877	7.19628e-06	0.0235619	0.157798	1	0.00374261	0.704102	1	-//-
MS.gene026886	MS.gene026886	chr2.3:21135331-21137987	918	0.946083	5.4968	0.466338	21.3323	21.3323	5.4968	0.466338	0.946083	-2.56896	-5.7147	2.15931	-1.01089	0.0459139	6.0184e-07	0.0256579	0.485861	1	0.000459558	0.732612	1	gnl|BL_ORD_ID|510429 sp|Q8GWF1|WRK38_ARATH Probable WRKY transcription factor 38 OS=Arabidopsis thaliana OX=3702 GN=WRKY38 PE=1 SV=1//1.49556e-20
MS.gene043926	-	chr5.3:50513095-50733774	609	0.256125	0.154824	0.030075	2.25992	2.25992	0.154824	0.030075	0.256125	0.68335	-6.46073	4.00915	-3.13836	0.739844	0.000236335	0.0286323	0.0988655	1	0.0498668	0.768446	1	-//-
MS.gene62810	MS.gene62810	chr8.1:21107523-21108203	681	6.80841	7.87968	1.41239	46.4037	46.4037	7.87968	1.41239	6.80841	-0.282634	-5.22653	2.72662	-2.2377	0.826697	5.70719e-05	0.0289335	0.0925731	1	0.0186948	0.772792	1	gnl|BL_ORD_ID|106414 sp|Q9FJ93|DRE1D_ARATH Dehydration-responsive element-binding protein 1D OS=Arabidopsis thaliana OX=3702 GN=DREB1D PE=2 SV=1//3.19035e-36
MS.gene035848	-	chr5.2:54213716-54525039	2109	1.40357	2.05891	0.358343	16.0651	16.0651	2.05891	0.358343	1.40357	-0.640875	-5.587	3.12642	-1.83314	0.671544	5.77182e-06	0.0319792	0.166512	1	0.00311532	0.807503	1	-//-
MS.gene29809	MS.gene29809	chr3.4:73142875-73143777	903	83.0083	81.3856	26.3627	344.691	344.691	81.3856	26.3627	83.0083	-0.0430105	-3.91872	2.26014	-1.63087	0.96541	7.1175e-05	0.0343292	0.0615304	1	0.02141	0.830486	1	gnl|BL_ORD_ID|124257 sp|Q9ZPE7|EXO_ARATH Protein EXORDIUM OS=Arabidopsis thaliana OX=3702 GN=EXO PE=2 SV=1//3.23815e-141
MS.gene033638	MS.gene033638	chr7.4:24112965-24124423	393	0.56146	0.732754	0.195199	6.64954	6.64954	0.732754	0.195199	0.56146	-0.988768	-5.25896	2.93652	-1.34663	0.493092	7.4404e-06	0.0363317	0.276368	1	0.00384331	0.85342	1	-//-
MS.gene78745	MS.gene78745	chr5.1:41899981-41901820	1200	5.99611	11.218	2.97948	44.6237	44.6237	11.218	2.97948	5.99611	-0.965449	-4.12209	2.1741	-0.996026	0.346769	2.13996e-05	0.0390318	0.286115	1	0.00894835	0.877518	1	-//-
MS.gene20879	-	chr1.3:61293629-61297483	1053	16.1454	20.3324	6.29239	66.9269	66.9269	20.3324	6.29239	16.1454	-0.125836	-3.41477	2.15739	-1.14758	0.901316	0.000227584	0.0394525	0.190493	1	0.0487024	0.8808	1	gnl|BL_ORD_ID|140897 sp|Q9XHM5|G2OX2_PEA Gibberellin 2-beta-dioxygenase 2 OS=Pisum sativum OX=3888 GN=GA2OX2 PE=2 SV=1//0
MS.gene022468	MS.gene022468	chr3.2:67299816-67300718	903	76.5554	62.7249	28.0294	271.533	271.533	62.7249	28.0294	76.5554	0.214805	-3.48699	2.28596	-1.43114	0.838447	0.00022084	0.0430967	0.0912851	1	0.0476496	0.911298	1	gnl|BL_ORD_ID|124257 sp|Q9ZPE7|EXO_ARATH Protein EXORDIUM OS=Arabidopsis thaliana OX=3702 GN=EXO PE=2 SV=1//1.05098e-140
MS.gene024202	MS.gene024202	chr7.1:22249720-22250106	387	2.75112	4.43342	0.924439	26.0653	26.0653	4.43342	0.924439	2.75112	-0.754312	-4.98798	2.71728	-1.52955	0.624804	8.90463e-05	0.0447575	0.283984	1	0.0251303	0.923819	1	-//-
MS.gene36267	MS.gene36267	chr2.1:2978208-2984541	4284	25.7558	38.1128	10.868	85.4927	85.4927	38.1128	10.868	25.7558	-0.627297	-3.20268	1.34664	-1.24046	0.511097	0.000235876	0.17756	0.109511	1	0.0498183	1	1	gnl|BL_ORD_ID|296352 sp|Q76CU2|PDR1_TOBAC Pleiotropic drug resistance protein 1 OS=Nicotiana tabacum OX=4097 GN=PDR1 PE=2 SV=1//0
MS.gene85624	MS.gene85624	chr2.1:48380057-48385434	1596	3.24788	5.31286	1.03061	9.95587	9.95587	5.31286	1.03061	3.24788	-0.769037	-3.50088	1.08816	-1.65471	0.450286	0.000201959	0.289349	0.0699173	1	0.0445505	1	1	gnl|BL_ORD_ID|43144 sp|Q9LTS4|BH041_ARATH Putative transcription factor bHLH041 OS=Arabidopsis thaliana OX=3702 GN=BHLH41 PE=3 SV=1//2.92381e-43
MS.gene068432	-	chr6.3:64202410-64275710	1494	2.86266	3.55938	0.425475	5.28714	5.28714	3.55938	0.425475	2.86266	-1.51442	-3.59847	0.504739	-1.59226	0.465777	0.000114558	0.794086	0.153596	1	0.0298093	1	1	gnl|BL_ORD_ID|478619 sp|B9SCB6|TPS2_RICCO Probable terpene synthase 2 OS=Ricinus communis OX=3988 GN=TPS2 PE=3 SV=1//1.51157e-176
MS.gene54571	MS.gene54571	chr4.3:37333778-37336049	1572	3.72994	7.67006	1.77543	19.0758	19.0758	7.67006	1.77543	3.72994	-1.10809	-3.64615	1.4855	-1.06342	0.334989	0.000157389	0.195408	0.28049	1	0.0371776	1	1	gnl|BL_ORD_ID|42939 sp|Q5Z9Z0|BGL24_ORYSJ Beta-glucosidase 24 OS=Oryza sativa subsp. japonica OX=39947 GN=BGLU24 PE=2 SV=1//0
MS.gene025119	MS.gene025119	chr2.4:50358805-50363723	1596	3.73961	8.46502	2.03705	25.1859	25.1859	8.46502	2.03705	3.73961	-1.24663	-3.85645	1.74947	-0.868381	0.234311	3.25349e-05	0.105148	0.308711	1	0.0123802	1	1	gnl|BL_ORD_ID|43144 sp|Q9LTS4|BH041_ARATH Putative transcription factor bHLH041 OS=Arabidopsis thaliana OX=3702 GN=BHLH41 PE=3 SV=1//2.75892e-43
MS.gene053932	MS.gene053932	chr5.3:42488951-42490806	1200	3.5499	11.1626	1.28259	16.2299	16.2299	11.1626	1.28259	3.5499	-1.71838	-3.87835	0.712956	-1.45742	0.136676	0.00010219	0.527802	0.164766	1	0.0278748	1	1	-//-
MS.gene52698	MS.gene52698	chr7.2:15689758-15695928	969	0.868416	2.30898	0.413732	5.86826	5.86826	2.30898	0.413732	0.868416	-1.47418	-4.04114	1.51046	-1.06848	0.285978	6.10339e-05	0.238964	0.359695	1	0.019412	1	1	gnl|BL_ORD_ID|99624 sp|Q9FIG7|DIR2_ARATH Dirigent protein 2 OS=Arabidopsis thaliana OX=3702 GN=DIR2 PE=2 SV=1//3.26938e-45
MS.gene052473	MS.gene052473	chr6.1:75927882-75929904	1098	3.80954	5.19133	0.621402	8.81166	8.81166	5.19133	0.621402	3.80954	-0.540668	-4.04513	0.925031	-2.58176	0.777271	0.000173698	0.606956	0.0449153	1	0.0397879	1	1	gnl|BL_ORD_ID|427429 sp|Q9SUN6|SBT22_ARATH Subtilisin-like protease SBT2.2 OS=Arabidopsis thaliana OX=3702 GN=SBT2.2 PE=3 SV=1//9.62998e-101
MS.gene057513	-	chr7.2:84708595-84805327	438	0.109063	2.03634	0.092734	1.43295	1.43295	2.03634	0.092734	0.109063	-4.17139	-4.18348	-0.0833598	-0.130099	0.00279381	0.000141797	0.946125	0.926168	0.299022	0.0347588	1	1	gnl|BL_ORD_ID|311580 sp|Q9SIC9|PP178_ARATH Pentatricopeptide repeat-containing protein At2g31400, chloroplastic OS=Arabidopsis thaliana OX=3702 GN=At2g31400 PE=2 SV=1//7.80665e-63
XLOC_052861	XLOC_052861	chr1.4:49270197-49272285	2089	1.21481	2.44293	0.467867	7.47623	7.47623	2.44293	0.467867	1.21481	-1.07005	-4.20325	1.78718	-1.35825	0.401502	0.000110944	0.129196	0.255791	1	0.0292157	1	1	-
MS.gene08274	MS.gene08274	chr4.2:15159003-15160358	1356	2.1326	6.54082	0.742437	12.6015	12.6015	6.54082	0.742437	2.1326	-1.67583	-4.29212	1.11095	-1.51606	0.270105	6.13771e-05	0.392878	0.263418	1	0.0194358	1	1	gnl|BL_ORD_ID|505181 sp|Q70PR7|VINSY_RAUSE Vinorine synthase OS=Rauvolfia serpentina OX=4060 GN=ACT PE=1 SV=2//4.25913e-58
MS.gene003904	MS.gene003904	chr4.4:39610560-39612923	1572	2.28665	6.79605	0.98514	17.2102	17.2102	6.79605	0.98514	2.28665	-1.63078	-4.3382	1.51526	-1.20895	0.15571	3.72804e-05	0.181267	0.267631	1	0.0137063	1	1	gnl|BL_ORD_ID|42939 sp|Q5Z9Z0|BGL24_ORYSJ Beta-glucosidase 24 OS=Oryza sativa subsp. japonica OX=39947 GN=BGLU24 PE=2 SV=1//0
MS.gene64173	MS.gene64173	chr5.2:18840114-18841151	1038	1.15747	6.99694	0.891447	15.9688	15.9688	6.99694	0.891447	1.15747	-2.6263	-4.36693	1.4025	-0.353062	0.0229673	0.000236543	0.186457	0.78419	0.941397	0.0498668	1	1	-//-
MS.gene97547	MS.gene97547	chr7.2:74771487-74771900	414	4.3568	13.1277	2.69319	49.8113	49.8113	13.1277	2.69319	4.3568	-1.65213	-4.41301	2.08809	-0.687121	0.248118	0.000102442	0.11069	0.586555	1	0.0279103	1	1	-//-
MS.gene34883	MS.gene34883	chr4.1:15605155-15606510	1356	2.57417	9.35028	0.809161	15.0658	15.0658	9.35028	0.809161	2.57417	-1.92648	-4.42432	0.854034	-1.65414	0.186826	2.9183e-05	0.506353	0.202371	1	0.0113314	1	1	gnl|BL_ORD_ID|505181 sp|Q70PR7|VINSY_RAUSE Vinorine synthase OS=Rauvolfia serpentina OX=4060 GN=ACT PE=1 SV=2//4.25913e-58
MS.gene020948	MS.gene020948	chr5.4:77577420-77578457	1038	2.43463	13.8245	0.740952	14.2421	14.2421	13.8245	0.740952	2.43463	-2.56454	-4.4504	0.225121	-1.67737	0.0258883	0.000185458	0.833687	0.187716	0.998312	0.0417168	1	1	-//-
MS.gene28352	MS.gene28352	chr4.2:38786708-38788979	1572	3.28432	5.80274	0.835754	17.7538	17.7538	5.80274	0.835754	3.28432	-0.895476	-4.63012	1.78346	-1.95987	0.440919	9.82826e-06	0.136028	0.0585656	1	0.00474401	1	1	gnl|BL_ORD_ID|42939 sp|Q5Z9Z0|BGL24_ORYSJ Beta-glucosidase 24 OS=Oryza sativa subsp. japonica OX=39947 GN=BGLU24 PE=2 SV=1//0
MS.gene030815	MS.gene030815	chr4.2:11217406-11224006	3261	8.04395	15.8085	1.53638	33.9796	33.9796	15.8085	1.53638	8.04395	-1.07422	-4.71299	1.26538	-2.3688	0.691872	2.20573e-06	0.51887	0.216104	1	0.00140278	1	1	gnl|BL_ORD_ID|69108 sp|Q8GSA7|CMTA3_ARATH Calmodulin-binding transcription activator 3 OS=Arabidopsis thaliana OX=3702 GN=CAMTA3 PE=1 SV=1//0
MS.gene044939	-	chr7.1:72955274-72998870	414	3.1504	7.85903	1.22362	32.3575	32.3575	7.85903	1.22362	3.1504	-1.43323	-4.9307	2.16343	-1.34887	0.270668	4.05279e-06	0.109879	0.136474	1	0.00234849	1	1	-//-
MS.gene74092	-	chr7.4:76504877-76509417	411	1.12425	2.60069	0.336294	9.8052	9.8052	2.60069	0.336294	1.12425	-1.41872	-4.97102	1.94089	-1.6232	0.423916	4.86859e-05	0.205887	0.273268	1	0.016791	1	1	-//-
MS.gene044933	MS.gene044933	chr7.1:72874078-72874491	414	2.41519	13.3383	2.11868	62.653	62.653	13.3383	2.11868	2.41519	-2.50617	-5.08343	2.39737	-0.194241	0.0964954	2.08197e-05	0.062542	0.891019	1	0.00877014	1	1	-//-
MS.gene74093	MS.gene74093	chr7.4:76502681-76503094	414	0.476665	2.84976	0.267095	13.0983	13.0983	2.84976	0.267095	0.476665	-2.57302	-5.74418	2.35133	-0.822936	0.220299	5.86125e-05	0.189674	0.623141	1	0.0190085	1	1	-//-
MS.gene05789	MS.gene05789	chr3.4:64852543-64854067	942	0.805151	5.5591	0.250157	15.4558	15.4558	5.5591	0.250157	0.805151	-2.87293	-6.18076	1.63607	-1.66901	0.242249	0.000167867	0.36461	0.472794	1	0.0390685	1	1	gnl|BL_ORD_ID|5858 sp|Q9MB94|ACCO_PRUMU 1-aminocyclopropane-1-carboxylate oxidase OS=Prunus mume OX=102107 GN=ACO1 PE=2 SV=1//0
MS.gene52696	MS.gene52696	chr7.2:15705146-15705727	582	0.510998	1.1732	0.090065	6.76273	6.76273	1.1732	0.090065	0.510998	-1.23559	-6.4079	2.67421	-2.50089	0.554509	0.000195897	0.140066	0.227068	1	0.04355	1	1	gnl|BL_ORD_ID|99624 sp|Q9FIG7|DIR2_ARATH Dirigent protein 2 OS=Arabidopsis thaliana OX=3702 GN=DIR2 PE=2 SV=1//5.63237e-51
MS.gene052898	MS.gene052898	chr3.1:71793064-71795505	1182	1.31952	8.82856	0.115597	10.4564	10.4564	8.82856	0.115597	1.31952	-2.80862	-6.69251	0.439061	-3.4497	0.100969	4.25592e-07	0.663202	0.0936877	1	0.000338565	1	1	gnl|BL_ORD_ID|472077 sp|A5AEM3|THS4_VITVI Stilbene synthase 4 OS=Vitis vinifera OX=29760 GN=GSVIVT00005194001 PE=3 SV=1//0
MS.gene068431	-	chr6.3:64197911-64231033	1485	0.223893	3.39172	0.0361385	3.82302	3.82302	3.39172	0.0361385	0.223893	-3.85895	-6.71439	0.355139	-2.50538	0.146743	4.32231e-05	0.849045	0.30171	1	0.0153775	1	1	gnl|BL_ORD_ID|478619 sp|B9SCB6|TPS2_RICCO Probable terpene synthase 2 OS=Ricinus communis OX=3988 GN=TPS2 PE=3 SV=1//1.71621e-169
MS.gene41469	MS.gene41469	chr3.1:52088466-52094933	4887	0.28664	0.406742	0.008581	1.30846	1.30846	0.406742	0.008581	0.28664	-0.523008	-7.26513	1.91007	-4.83673	0.775619	9.10379e-06	0.0900287	0.0550673	1	0.00446992	1	1	gnl|BL_ORD_ID|106620 sp|Q940K0|DRL15_ARATH Probable disease resistance protein At1g61180 OS=Arabidopsis thaliana OX=3702 GN=At1g61180 PE=2 SV=2//3.78625e-47
MS.gene87813	MS.gene87813	chr3.1:58942256-58942582	327	0.258887	23.6828	0.231325	61.8797	61.8797	23.6828	0.231325	0.258887	-6.39327	-8.05742	1.54856	-0.117629	0.00218329	0.000117717	0.435902	1	0.257275	0.0304375	1	1	gnl|BL_ORD_ID|426223 sp|Q94AK6|SAG20_ARATH Senescence associated gene 20 OS=Arabidopsis thaliana OX=3702 GN=SAG20 PE=2 SV=1//1.92279e-34
MS.gene053788	MS.gene053788	chr5.1:45060180-45082921	4359	0.0068615	0.0818045	0	0.266251	0.266251	0.0818045	0	0.0068615	-3.51094	-9.18562	-0.132748	-5.8916	0.165877	0.000207405	0.94771	0.168458	1	0.0454573	1	1	gnl|BL_ORD_ID|435745 sp|O64483|SIRK_ARATH Senescence-induced receptor-like serine/threonine-protein kinase OS=Arabidopsis thaliana OX=3702 GN=SIRK PE=2 SV=1//5.47143e-157
MS.gene95412	MS.gene95412	chr5.4:68068312-68071095	2094	0.029433	0.186976	0	0.469041	0.469041	0.186976	0	0.029433	-2.57706	-9.19558	1.48007	-5.17952	0.287659	0.00016063	0.432971	0.287724	1	0.0378471	1	1	gnl|BL_ORD_ID|385405 sp|F4IUU1|RLP27_ARATH Receptor like protein 27 OS=Arabidopsis thaliana OX=3702 GN=RLP27 PE=2 SV=1//3.86032e-120
MS.gene45255	-	chr7.3:85259060-85406188	672	0.0268625	0.508011	0.0007535	0.658686	0.658686	0.508011	0.0007535	0.0268625	-4.19874	-9.70776	0.667927	-4.89758	0.110725	1.50392e-06	0.746502	0.0520807	1	0.00101587	1	1	gnl|BL_ORD_ID|311580 sp|Q9SIC9|PP178_ARATH Pentatricopeptide repeat-containing protein At2g31400, chloroplastic OS=Arabidopsis thaliana OX=3702 GN=At2g31400 PE=2 SV=1//7.01713e-13
MS.gene27289	MS.gene27289	chr1.1:1831628-1835018	846	0.012173	0.32429	0	0.612717	0.612717	0.32429	0	0.012173	-4.46952	-9.86354	1.20769	-4.23249	0.0764394	2.4945e-05	0.512025	0.512435	1	0.0100627	1	1	gnl|BL_ORD_ID|318171 sp|O23712|PSA1B_ARATH Proteasome subunit alpha type-1-B OS=Arabidopsis thaliana OX=3702 GN=PAF2 PE=1 SV=2//7.60822e-156
MS.gene049824	MS.gene049824	chr4.3:40881963-40904793	3968	0.0056345	0.444922	0	0.384761	0.384761	0.444922	0	0.0056345	-6.17421	-11.9447	0.0871138	-5.74564	0.0178326	5.09745e-07	0.964606	0.16235	0.831791	0.000395875	1	1	gnl|BL_ORD_ID|275126 sp|F4JXF9|NRPC1_ARATH DNA-directed RNA polymerase III subunit 1 OS=Arabidopsis thaliana OX=3702 GN=NRPC1 PE=2 SV=1//0
MS.gene002046	MS.gene002046	chr2.3:75814447-75816526	1119	#N/A	#N/A	0	0.664957	0.664957	0	#N/A	#N/A	#N/A	-9.28761	9.27898	#N/A	#N/A	0.000140589	0.000272673	#N/A	#N/A	0.0345144	0.0535258	#N/A	gnl|BL_ORD_ID|553993 sp|Q2V3L3|YY1_ARATH Zinc finger transcription factor YY1 OS=Arabidopsis thaliana OX=3702 GN=YY1 PE=1 SV=1//1.61935e-36
MS.gene68186	MS.gene68186	chr3.1:92334645-92342316	1451	#N/A	#N/A	0	1.59813	1.59813	0	#N/A	#N/A	#N/A	-12.4086	12.4091	#N/A	#N/A	0.00023352	0.000300306	#N/A	#N/A	0.049412	0.057675	#N/A	gnl|BL_ORD_ID|263541 sp|Q94CL6|NAR1_ARATH Protein NAR1 OS=Arabidopsis thaliana OX=3702 GN=NAR1 PE=1 SV=1//0
MS.gene51527	MS.gene51527	chr3.4:3191626-3197455	2070	0	0.012913	0	0.440194	0.440194	0.012913	#N/A	#N/A	-4.9551	-10.1733	5.27355	#N/A	0.372364	2.28631e-05	0.0051787	#N/A	1	0.00942229	0.332287	#N/A	-//-
MS.gene21120	MS.gene21120	chr1.4:67767972-67771350	1245	0	0.14508	0	1.66911	1.66911	0.14508	#N/A	#N/A	-7.63293	-11.305	3.71426	#N/A	0.00521764	6.61891e-06	0.0155714	#N/A	0.428618	0.00350623	0.5811	#N/A	gnl|BL_ORD_ID|290754 sp|F4I839|PAE2_ARATH Pectin acetylesterase 2 OS=Arabidopsis thaliana OX=3702 GN=PAE2 PE=2 SV=1//0
MS.gene023431	MS.gene023431	chr4.1:15337137-15342453	1410	0	0.120675	0	5.98406	5.98406	0.120675	#N/A	#N/A	-7.93658	-13.8009	5.91966	#N/A	0.0246284	6.73057e-05	0.0330138	#N/A	0.975556	0.020794	0.818104	#N/A	gnl|BL_ORD_ID|161781 sp|Q54ED4|GRWD1_DICDI Glutamate-rich WD repeat-containing protein 1 OS=Dictyostelium discoideum OX=44689 GN=grwd1 PE=3 SV=1//9.45908e-117
MS.gene016096	MS.gene016096	chr1.2:7859824-7861134	771	0	0.193412	0	1.48286	1.48286	0.193412	#N/A	#N/A	-6.71685	-9.75832	3.09167	#N/A	0.023571	9.69045e-05	0.0476011	#N/A	0.95239	0.0266561	0.946133	#N/A	gnl|BL_ORD_ID|510431 sp|Q9SAH7|WRK40_ARATH Probable WRKY transcription factor 40 OS=Arabidopsis thaliana OX=3702 GN=WRKY40 PE=1 SV=1//9.0551e-42
MS.gene36227	MS.gene36227	15689:5299-10262	732	0	0.354244	0	0.337871	0.337871	0.354244	#N/A	#N/A	-9.49874	-9.55451	0.0935995	#N/A	0.00547181	5.8967e-05	0.962339	#N/A	0.441241	0.0190312	1	#N/A	gnl|BL_ORD_ID|94998 sp|Q9FUZ0|DEF1A_SOLLC Peptide deformylase 1A, chloroplastic OS=Solanum lycopersicum OX=4081 GN=PDF1A PE=2 SV=1//1.93233e-62
MS.gene071455	MS.gene071455	chr1.3:58674514-58678580	2166	0	0.287096	0	0.439273	0.439273	0.287096	#N/A	#N/A	-8.90368	-9.64504	0.780908	#N/A	0.00991016	5.29351e-05	0.677689	#N/A	0.603792	0.0178395	1	#N/A	gnl|BL_ORD_ID|199701 sp|Q9SSE9|JMJ25_ARATH Lysine-specific demethylase JMJ25 OS=Arabidopsis thaliana OX=3702 GN=JMJ25 PE=1 SV=1//9.21948e-23
MS.gene065800	MS.gene065800	chr4.2:31443607-31446891	1100	0	0.139652	0	0.607734	0.607734	0.139652	#N/A	#N/A	-7.471	-9.8035	2.39688	#N/A	0.0382051	3.55655e-05	0.197483	#N/A	1	0.0132033	1	#N/A	gnl|BL_ORD_ID|193926 sp|Q5ZL91|INT7_CHICK Integrator complex subunit 7 OS=Gallus gallus OX=9031 GN=INTS7 PE=2 SV=1//4.56836e-16
XLOC_269865	XLOC_269865	chr7.2:40876719-40881503	4785	0.001869	0.561936	0	0.492358	0.492358	0.561936	#N/A	#N/A	-7.81234	-10.0421	-0.0262564	#N/A	0.00620063	1.49058e-05	0.990527	#N/A	0.47042	0.00679278	1	#N/A	-
MS.gene024382	MS.gene024382	chr7.2:309434-332199	2421	0	0.132166	0	0.119212	0.119212	0.132166	#N/A	#N/A	-10.2699	-10.2445	0.0125538	#N/A	0.00249649	7.69163e-06	0.995817	#N/A	0.280197	0.00392545	1	#N/A	gnl|BL_ORD_ID|216951 sp|Q6R0H1|LHY_ARATH Protein LHY OS=Arabidopsis thaliana OX=3702 GN=LHY PE=1 SV=2//3.91883e-99
MS.gene017161	MS.gene017161	chr5.3:74078980-74081338	1425	0	0.969369	0	1.41972	1.41972	0.969369	#N/A	#N/A	-9.76806	-10.5512	0.843285	#N/A	0.00414298	3.81461e-06	0.647065	#N/A	0.374925	0.00224465	1	#N/A	gnl|BL_ORD_ID|47991 sp|Q50EK1|C16B1_PICSI Cytochrome P450 716B1 OS=Picea sitchensis OX=3332 GN=CYP716B1 PE=2 SV=1//8.5867e-119
MS.gene061938	MS.gene061938	chr7.2:12370920-12373942	1980	0	0.851947	0	1.50745	1.50745	0.851947	#N/A	#N/A	-10.0456	-10.9934	0.984709	#N/A	0.00312214	4.84132e-07	0.585927	#N/A	0.319475	0.000379841	1	#N/A	-//-
MS.gene034962	MS.gene034962	chr1.3:44558725-44561754	1560	0	0.439014	0	1.53518	1.53518	0.439014	#N/A	#N/A	-9.09175	-11.0304	1.96915	#N/A	0.0082259	0.000170473	0.369813	#N/A	0.547694	0.0394738	1	#N/A	gnl|BL_ORD_ID|112122 sp|O24534|EF1A_VICFA Elongation factor 1-alpha OS=Vicia faba OX=3906 PE=2 SV=1//0
MS.gene53810	-	chr7.1:67434384-67569037	861	0	2.67646	0	2.68893	2.68893	2.67646	#N/A	#N/A	-11.5355	-11.6749	0.172032	#N/A	0.000622638	2.45201e-07	0.927007	#N/A	0.11575	0.000210011	1	#N/A	-//-
MS.gene39051	MS.gene39051	chr7.4:17539916-17545520	2565	0	0.885787	0	1.32375	1.32375	0.885787	#N/A	#N/A	-10.8836	-11.6944	0.873394	#N/A	0.00129408	1.9956e-08	0.625788	#N/A	0.187096	2.3246e-05	1	#N/A	gnl|BL_ORD_ID|311602 sp|Q8RWS8|PP199_ARATH Pentatricopeptide repeat-containing protein At2g41720 OS=Arabidopsis thaliana OX=3702 GN=EMB2654 PE=2 SV=1//1.53063e-30
MS.gene78736	MS.gene78736	chr5.4:42216989-42223575	1476	0	0.081654	0	1.79261	1.79261	0.081654	#N/A	#N/A	-7.69662	-12.3719	4.73053	#N/A	0.0306989	0.000229202	0.0720862	#N/A	1	0.0488151	1	#N/A	gnl|BL_ORD_ID|299471 sp|Q9SX31|PERK9_ARATH Proline-rich receptor-like protein kinase PERK9 OS=Arabidopsis thaliana OX=3702 GN=PERK9 PE=1 SV=1//0
MS.gene08212	MS.gene08212	chr7.3:23037653-23042573	2106	0	1.74242	0	2.77754	2.77754	1.74242	#N/A	#N/A	-11.6704	-12.5719	0.966531	#N/A	0.000539411	2.46958e-10	0.588058	#N/A	0.104357	5.12579e-07	1	#N/A	gnl|BL_ORD_ID|168598 sp|Q852L0|HD16N_ORYSJ Casein kinase 1-like protein HD16 OS=Oryza sativa subsp. japonica OX=39947 GN=HD16 PE=1 SV=1//1.38883e-07
MS.gene68971	MS.gene68971	chr8.1:15223275-15227289	756	0	4.14672	0	5.53216	5.53216	4.14672	#N/A	#N/A	-12.6264	-13.2823	0.711787	#N/A	0.00018951	9.53111e-05	0.782853	#N/A	0.050482	0.0263767	1	#N/A	gnl|BL_ORD_ID|76889 sp|Q9FN50|CPP1_ARATH Protein CHAPERONE-LIKE PROTEIN OF POR1, chloroplastic OS=Arabidopsis thaliana OX=3702 GN=CPP1 PE=1 SV=1//7.1505e-110
MS.gene78829	MS.gene78829	chr4.2:80440404-80446466	1308	0	0.303175	0	4.08411	4.08411	0.303175	#N/A	#N/A	-9.56374	-13.4395	3.90626	#N/A	0.0051142	8.52153e-05	0.14123	#N/A	0.42517	0.0244134	1	#N/A	gnl|BL_ORD_ID|471241 sp|Q56WD9|THIK2_ARATH 3-ketoacyl-CoA thiolase 2, peroxisomal OS=Arabidopsis thaliana OX=3702 GN=PED1 PE=1 SV=2//0
MS.gene012487	MS.gene012487	chr8.2:4202400-4206040	1524	0	3.27188	0	7.72381	7.72381	3.27188	#N/A	#N/A	-12.2516	-13.6122	1.40032	#N/A	0.000284457	4.22396e-13	0.439093	#N/A	0.0663313	2.60645e-09	1	#N/A	gnl|BL_ORD_ID|11500 sp|Q3V384|AFG1L_MOUSE AFG1-like ATPase OS=Mus musculus OX=10090 GN=Afg1l PE=1 SV=1//5.12204e-78
MS.gene060851	MS.gene060851	10697:8390-11887	1041	0	3.13254	0	16.001	16.001	3.13254	#N/A	#N/A	-12.0225	-14.5984	2.64577	#N/A	0.000369482	4.5929e-05	0.334162	#N/A	0.0800538	0.0161078	1	#N/A	gnl|BL_ORD_ID|65136 sp|Q8L518|CK2_ARATH Probable choline kinase 2 OS=Arabidopsis thaliana OX=3702 GN=At1g74320 PE=2 SV=1//1.21613e-165
MS.gene74342	MS.gene74342	chr8.4:55497250-55498891	435	#N/A	#N/A	76.8616	52.5852	52.5852	0	76.8616	0	#N/A	0.285979	15.2238	15.5721	#N/A	0.918602	4.23485e-05	2.32464e-05	#N/A	1	0.014793	0.00804884	gnl|BL_ORD_ID|240620 sp|Q9SSK5|MLP43_ARATH MLP-like protein 43 OS=Arabidopsis thaliana OX=3702 GN=MLP43 PE=1 SV=1//2.12201e-17
MS.gene86831	MS.gene86831	chr1.1:58441864-58448914	3063	#N/A	#N/A	7.82872	7.99083	7.99083	0	7.82872	0	#N/A	-0.262249	14.6103	14.4032	#N/A	0.752519	7.263e-15	1.74819e-17	#N/A	1	1.36157e-10	1.94558e-13	gnl|BL_ORD_ID|278782 sp|Q8RY25|NU98A_ARATH Nuclear pore complex protein NUP98A OS=Arabidopsis thaliana OX=3702 GN=NUP98A PE=1 SV=1//4.43554e-32
MS.gene31670	MS.gene31670	chr1.1:12098805-12102334	1419	#N/A	#N/A	10.1485	5.60002	5.60002	0	10.1485	0	#N/A	0.660423	13.1008	13.8069	#N/A	0.799593	0.000137208	5.81776e-05	#N/A	1	0.0336671	0.0166424	gnl|BL_ORD_ID|3582 sp|P92934|AAP6_ARATH Amino acid permease 6 OS=Arabidopsis thaliana OX=3702 GN=AAP6 PE=1 SV=1//0
MS.gene81896	MS.gene81896	chr6.4:55238597-55282219	459	#N/A	#N/A	1.41653	1.77981	1.77981	0	1.41653	0	#N/A	-0.565911	14.1911	13.6857	#N/A	0.759941	6.80072e-05	2.87968e-15	#N/A	1	0.0211019	1.81896e-11	gnl|BL_ORD_ID|172694 sp|F4JDJ0|HIP47_ARATH Heavy metal-associated isoprenylated plant protein 47 OS=Arabidopsis thaliana OX=3702 GN=HIPP47 PE=3 SV=1//1.95262e-11
MS.gene046604	MS.gene046604	10996:5700-7888	969	#N/A	#N/A	14.2811	11.7625	11.7625	0	14.2811	0	#N/A	0.00149472	13.4815	13.5594	#N/A	0.999702	0.000105598	6.70404e-05	#N/A	1	0.0287593	0.0184984	gnl|BL_ORD_ID|278776 sp|Q02500|NU6M_WHEAT NADH-ubiquinone oxidoreductase chain 6 OS=Triticum aestivum OX=4565 GN=ND6 PE=3 SV=1//2.01849e-45
MS.gene02650	MS.gene02650	chr3.1:72360719-72367623	3117	#N/A	#N/A	4.46849	2.01539	2.01539	0	4.46849	0	#N/A	0.870027	12.5943	13.5407	#N/A	0.73467	0.00023323	6.77531e-05	#N/A	1	0.0477584	0.0186216	gnl|BL_ORD_ID|442490 sp|Q9STN3|SPT51_ARATH Putative transcription elongation factor SPT5 homolog 1 OS=Arabidopsis thaliana OX=3702 GN=At4g08350 PE=1 SV=2//0
MS.gene021152	MS.gene021152	chr4.4:41682462-41688005	3006	#N/A	#N/A	4.86242	5.17077	5.17077	0	4.86242	0	#N/A	-0.350273	13.6341	13.3462	#N/A	0.893252	0.000101985	7.71203e-05	#N/A	1	0.0280815	0.0204353	gnl|BL_ORD_ID|326387 sp|Q9ZW06|PUM2_ARATH Pumilio homolog 2 OS=Arabidopsis thaliana OX=3702 GN=APUM2 PE=1 SV=1//0
MS.gene24268	MS.gene24268	chr1.1:1935615-1941251	1932	#N/A	#N/A	3.54135	4.85474	4.85474	0	3.54135	0	#N/A	-0.638613	13.5674	12.9617	#N/A	0.689826	8.94987e-07	2.13034e-08	#N/A	1	0.000623332	2.38223e-05	gnl|BL_ORD_ID|444467 sp|O04235|SSRP1_VICFA FACT complex subunit SSRP1 OS=Vicia faba OX=3906 GN=SSRP1 PE=2 SV=1//0
MS.gene027546	MS.gene027546	chr5.3:24283624-24292188	1821	#N/A	#N/A	2.35587	1.37454	1.37454	0	2.35587	0	#N/A	0.547915	12.3542	12.957	#N/A	0.561359	6.66421e-09	4.61772e-13	#N/A	1	9.73495e-06	1.61077e-09	gnl|BL_ORD_ID|270773 sp|Q7RTR2|NLRC3_HUMAN NLR family CARD domain-containing protein 3 OS=Homo sapiens OX=9606 GN=NLRC3 PE=1 SV=2//6.63221e-26
MS.gene07158	MS.gene07158	chr1.4:70944603-70954726	2640	0	0.0212925	1.68605	3.9791	3.9791	0.0212925	1.68605	0	-6.49081	-1.42696	7.67968	12.7382	0.0947817	0.425543	2.34215e-06	0.000130334	1	1	0.00142402	0.0298048	gnl|BL_ORD_ID|46965 sp|Q8L7U5|BSL1_ARATH Serine/threonine-protein phosphatase BSL1 OS=Arabidopsis thaliana OX=3702 GN=BSL1 PE=1 SV=2//0
MS.gene058482	MS.gene058482	chr1.4:7707152-7715556	1227	#N/A	#N/A	1.97817	2.28198	2.28198	0	1.97817	0	#N/A	-0.483611	13.0576	12.6502	#N/A	0.819457	0.000141335	2.2454e-06	#N/A	1	0.0341145	0.00124792	gnl|BL_ORD_ID|172481 sp|Q8RXN4|HIBC5_ARATH 3-hydroxyisobutyryl-CoA hydrolase-like protein 2, mitochondrial OS=Arabidopsis thaliana OX=3702 GN=At4g31810 PE=1 SV=1//0
MS.gene014182	MS.gene014182	chr3.1:93057336-93062176	2193	#N/A	#N/A	3.29868	3.03242	3.03242	0	3.29868	0	#N/A	-0.0763223	12.6718	12.6411	#N/A	0.976146	0.000213844	0.000144314	#N/A	1	0.0450435	0.0322138	gnl|BL_ORD_ID|250303 sp|Q8LPQ8|MSSP2_ARATH Monosaccharide-sensing protein 2 OS=Arabidopsis thaliana OX=3702 GN=MSSP2 PE=1 SV=2//0
MS.gene02694	MS.gene02694	chr3.3:86579701-86592613	5139	#N/A	#N/A	0.956249	1.06855	1.06855	0	0.956249	0	#N/A	-0.433985	12.5818	12.2207	#N/A	0.808959	3.55011e-09	0.000224641	#N/A	1	5.58485e-06	0.0435334	gnl|BL_ORD_ID|92820 sp|Q5N870|DCL3A_ORYSJ Endoribonuclease Dicer homolog 3a OS=Oryza sativa subsp. japonica OX=39947 GN=DCL3A PE=2 SV=1//0
MS.gene035904	MS.gene035904	chr5.2:53040857-53043273	1140	#N/A	#N/A	4.34928	8.14685	8.14685	0	4.34928	0	#N/A	-1.10647	13.0921	12.0253	#N/A	0.551516	0.000146543	2.62837e-09	#N/A	1	0.0350706	3.70998e-06	gnl|BL_ORD_ID|478449 sp|Q9C9S4|TPPB_ARATH Trehalose-phosphate phosphatase B OS=Arabidopsis thaliana OX=3702 GN=TPPB PE=1 SV=1//1.44395e-151
MS.gene47965	MS.gene47965	chr4.1:10994498-10997098	1284	#N/A	#N/A	3.3821	3.28867	3.28867	0	3.3821	0	#N/A	-0.181634	11.8915	11.7618	#N/A	0.852187	3.39197e-08	4.53203e-09	#N/A	1	3.85383e-05	5.91726e-06	gnl|BL_ORD_ID|348177 sp|Q9LY87|RGLG2_ARATH E3 ubiquitin-protein ligase RGLG2 OS=Arabidopsis thaliana OX=3702 GN=RGLG2 PE=1 SV=1//1.21377e-172
MS.gene033115	MS.gene033115	chr8.2:17253088-17255858	588	#N/A	#N/A	1.81958	1.34766	1.34766	0	1.81958	0	#N/A	0.188525	10.7026	10.9498	#N/A	0.864179	4.33976e-06	2.71298e-07	#N/A	1	0.00245295	0.00021065	-//-
MS.gene40318	MS.gene40318	chr3.4:94980998-94984580	582	0	0.0183565	1.3539	1.70558	1.70558	0.0183565	1.3539	0	-4.76904	-0.572535	6.70432	10.8929	0.418367	0.580807	8.9015e-05	3.52472e-07	1	1	0.0254445	0.000259864	gnl|BL_ORD_ID|476368 sp|Q8L860|TOL9_ARATH TOM1-like protein 9 OS=Arabidopsis thaliana OX=3702 GN=TOL9 PE=1 SV=1//2.15697e-95
MS.gene08549	MS.gene08549	chr4.3:15040175-15043014	1138	#N/A	#N/A	1.5538	0.955996	0.955996	0	1.5538	0	#N/A	0.465974	10.2423	10.7641	#N/A	0.674715	1.87631e-05	4.939e-07	#N/A	1	0.00778774	0.000350902	-//-
MS.gene21743	MS.gene21743	chr5.2:2117700-2121868	939	#N/A	#N/A	0.948978	0.899972	0.899972	0	0.948978	0	#N/A	-0.178107	10.7092	10.5926	#N/A	0.878891	4.13557e-06	3.04007e-06	#N/A	1	0.00236727	0.00159305	gnl|BL_ORD_ID|396415 sp|Q5R7B0|RPP29_PONAB Ribonuclease P protein subunit p29 OS=Pongo abelii OX=9601 GN=POP4 PE=2 SV=1//8.63e-20
MS.gene030490	MS.gene030490	chr4.1:6718410-6723982	1352	#N/A	#N/A	0.565362	0.50154	0.50154	0	0.565362	0	#N/A	-0.0680147	10.2803	10.2708	#N/A	0.956772	1.78989e-05	5.41405e-06	#N/A	1	0.00752625	0.00253066	-//-
MS.gene79464	MS.gene79464	chr4.1:6381134-6389900	2145	#N/A	#N/A	0.289992	0.599442	0.599442	0	0.289992	0	#N/A	-1.2408	11.1904	9.99122	#N/A	0.324008	6.70062e-07	6.82267e-05	#N/A	1	0.00048407	0.0187152	-//-
MS.gene012560	MS.gene012560	chr8.4:3034574-3039158	1557	#N/A	#N/A	0.514778	0.421109	0.421109	0	0.514778	0	#N/A	0.0633486	9.74652	9.86486	#N/A	0.958994	7.46296e-05	1.30733e-05	#N/A	1	0.0225351	0.00516985	gnl|BL_ORD_ID|510424 sp|P59583|WRK32_ARATH Probable WRKY transcription factor 32 OS=Arabidopsis thaliana OX=3702 GN=WRKY32 PE=2 SV=1//3.70871e-119
MS.gene62393	MS.gene62393	chr8.2:13821476-13822692	978	#N/A	#N/A	1.90135	1.5574	1.5574	0	1.90135	0	#N/A	0.0708851	9.71768	9.84107	#N/A	0.958248	7.69547e-05	1.44579e-05	#N/A	1	0.0229391	0.0055667	gnl|BL_ORD_ID|229665 sp|Q9XI36|MBD10_ARATH Methyl-CpG-binding domain-containing protein 10 OS=Arabidopsis thaliana OX=3702 GN=MBD10 PE=1 SV=1//4.06821e-21
MS.gene030602	-	chr4.2:8909978-8915350	177	#N/A	#N/A	0.508881	1.159	1.159	0	0.508881	0	#N/A	-1.43274	11.2119	9.83944	#N/A	0.240196	4.18868e-06	1.43712e-05	#N/A	1	0.00238553	0.00555159	gnl|BL_ORD_ID|348532 sp|Q41382|RH7_SPIOL DEAD-box ATP-dependent RNA helicase 7 OS=Spinacia oleracea OX=3562 GN=RH7 PE=2 SV=1//8.83101e-10
MS.gene034715	-	chr1.1:43587992-43593291	177	#N/A	#N/A	0.71331	0.969094	0.969094	0	0.71331	0	#N/A	-0.9275	10.6402	9.76963	#N/A	0.439384	1.19095e-05	1.78587e-05	#N/A	1	0.00545653	0.00659366	gnl|BL_ORD_ID|348532 sp|Q41382|RH7_SPIOL DEAD-box ATP-dependent RNA helicase 7 OS=Spinacia oleracea OX=3562 GN=RH7 PE=2 SV=1//8.83101e-10
MS.gene75004	MS.gene75004	chr1.4:85587659-85589137	1232	#N/A	#N/A	1.08814	1.32267	1.32267	0	1.08814	0	#N/A	-0.499926	9.76542	9.31746	#N/A	0.674429	7.05599e-05	6.76276e-05	#N/A	1	0.0216256	0.0186216	gnl|BL_ORD_ID|308290 sp|Q9SCP2|PLY12_ARATH Probable pectate lyase 12 OS=Arabidopsis thaliana OX=3702 GN=At3g53190 PE=2 SV=2//7.32977e-175
MS.gene019088	MS.gene019088	23203:9880-12911	1407	#N/A	#N/A	0.466793	0.870674	0.870674	0	0.466793	0	#N/A	-1.11782	10.2016	9.13583	#N/A	0.343907	2.06966e-05	0.000113963	#N/A	1	0.00844993	0.0272895	-//-
MS.gene018376	-	chr8.2:5221028-5223993	342	0.010644	0.02777	3.12331	2.11631	2.11631	0.02777	3.12331	0.010644	-1.29473	0.259735	6.03927	7.50567	0.579419	0.817481	0.000202275	7.12909e-07	1	1	0.0434611	0.000469339	gnl|BL_ORD_ID|531187 sp|P0C8Q4|Y4990_ARATH Uncharacterized protein At4g19900 OS=Arabidopsis thaliana OX=3702 GN=At4g19900 PE=2 SV=1//2.56315e-10
MS.gene38898	-	chr8.4:50920414-50932138	1080	0.004983	0	0.391029	1.09371	1.09371	0	0.391029	0.004983	4.67507	-1.8056	12.3245	5.80649	0.394418	0.0710311	3.33991e-09	0.000291	1	1	5.3287e-06	0.0526802	-//-
XLOC_016759	XLOC_016759	57436:11207-25359	3623	#N/A	#N/A	0.720337	0.303704	0.303704	0	0.720337	0	#N/A	1.04788	10.9042	11.9947	#N/A	0.575005	5.38216e-06	0.000290976	#N/A	1	0.00292457	0.0526802	-
MS.gene019381	-	chr8.3:60035906-60041941	915	0.014394	0	1.69737	1.82403	1.82403	0	1.69737	0.014394	4.57639	-0.356113	10.9386	6.13873	0.449045	0.752708	3.38144e-06	0.000324912	1	1	0.00198096	0.0570089	-//-
MS.gene040026	MS.gene040026	chr3.2:64753699-64762509	2139	#N/A	#N/A	0.771724	0.774614	0.774614	0	0.771724	0	#N/A	-0.276118	11.4839	11.2779	#N/A	0.876232	2.11611e-07	0.000648853	#N/A	1	0.000178962	0.0908596	gnl|BL_ORD_ID|494354 sp|F4IY62|UGPA3_ARATH UTP--glucose-1-phosphate uridylyltransferase 3, chloroplastic OS=Arabidopsis thaliana OX=3702 GN=UGP3 PE=1 SV=1//0
MS.gene003292	MS.gene003292	chr2.4:59553893-59558276	1978	#N/A	#N/A	1.42579	0.875537	0.875537	0	1.42579	0	#N/A	0.520066	10.736	11.2901	#N/A	0.781472	1.35909e-05	0.000650867	#N/A	1	0.00607836	0.090902	gnl|BL_ORD_ID|42876 sp|A7LXU3|BGH3B_BACO1 Beta-glucosidase BoGH3B OS=Bacteroides ovatus (strain ATCC 8483 / DSM 1896 / JCM 5824 / NCTC 11153) OX=411476 GN=BACOVA_02659 PE=1 SV=1//1.17025e-76
MS.gene065807	MS.gene065807	chr1.3:55797900-55804612	2993	#N/A	#N/A	0.767476	3.10739	3.10739	0	0.767476	0	#N/A	-2.19553	13.1752	11.0111	#N/A	0.391502	0.000138814	0.000869575	#N/A	1	0.0339063	0.109726	gnl|BL_ORD_ID|278782 sp|Q8RY25|NU98A_ARATH Nuclear pore complex protein NUP98A OS=Arabidopsis thaliana OX=3702 GN=NUP98A PE=1 SV=1//7.49478e-15
MS.gene09186	MS.gene09186	chr4.4:16482892-16488106	1160	#N/A	#N/A	0.962322	1.86411	1.86411	0	0.962322	0	#N/A	-1.2232	12.0769	10.9227	#N/A	0.479727	1.15235e-08	0.000939142	#N/A	1	1.54306e-05	0.115948	gnl|BL_ORD_ID|271802 sp|Q8VYP6|NOL9_ARATH Polynucleotide 5&apos;-hydroxyl-kinase NOL9 OS=Arabidopsis thaliana OX=3702 GN=At5g11010 PE=2 SV=1//8.05718e-124
MS.gene20090	-	chr7.3:60817194-60824451	1884	#N/A	#N/A	0.867496	1.7167	1.7167	0	0.867496	0	#N/A	-1.31993	11.7829	10.53	#N/A	0.448543	6.98906e-08	0.00143911	#N/A	1	7.17926e-05	0.15212	gnl|BL_ORD_ID|163506 sp|Q9FGW9|GTE10_ARATH Transcription factor GTE10 OS=Arabidopsis thaliana OX=3702 GN=GTE10 PE=1 SV=2//8.12522e-89
MS.gene53179	MS.gene53179	chr5.4:33257256-33267932	1203	#N/A	#N/A	0.342257	0.617334	0.617334	0	0.342257	0	#N/A	-1.04204	11.5166	10.5158	#N/A	0.554384	2.61725e-07	0.00147718	#N/A	1	0.000216462	0.154537	gnl|BL_ORD_ID|42975 sp|Q9FZE0|BGL40_ARATH Beta-glucosidase 40 OS=Arabidopsis thaliana OX=3702 GN=BGLU40 PE=2 SV=1//0
MS.gene059694	MS.gene059694	chr4.1:9971152-9973606	1416	#N/A	#N/A	1.31326	14.1457	14.1457	0	1.31326	0	#N/A	-3.606	13.9101	10.3356	#N/A	0.177462	8.55523e-05	0.00178473	#N/A	1	0.0246742	0.175037	gnl|BL_ORD_ID|29217 sp|P14133|ASO_CUCSA L-ascorbate oxidase OS=Cucumis sativus OX=3659 PE=1 SV=1//4.45696e-157
MS.gene066340	MS.gene066340	32528:396-3531	1380	#N/A	#N/A	0.948558	1.20902	1.20902	0	0.948558	0	#N/A	-0.622448	10.7206	10.1693	#N/A	0.727305	4.85411e-06	0.00207576	#N/A	1	0.00269625	0.193009	gnl|BL_ORD_ID|302390 sp|A7PZL3|PGLR_VITVI Probable polygalacturonase OS=Vitis vinifera OX=29760 GN=GSVIVT00026920001 PE=1 SV=1//1.52874e-139
MS.gene020472	MS.gene020472	chr4.1:2096991-2099009	873	#N/A	#N/A	1.3439	9.5925	9.5925	0	1.3439	0	#N/A	-3.0952	13.0676	10.0349	#N/A	0.228872	0.000148999	0.0023842	#N/A	1	0.0354697	0.209316	gnl|BL_ORD_ID|426855 sp|Q9C9T2|SARD1_ARATH Protein SAR DEFICIENT 1 OS=Arabidopsis thaliana OX=3702 GN=SARD1 PE=1 SV=1//2.2035e-84
MS.gene056167	-	chr8.1:66002106-66019829	4332	#N/A	#N/A	0.0529435	0.533969	0.533969	0	0.0529435	0	#N/A	-3.03811	10.9478	7.95938	#N/A	0.0300443	5.3285e-06	0.00291397	#N/A	0.777369	0.00290242	0.238123	-//-
MS.gene22707	MS.gene22707	chr7.4:900927-917521	3468	0.163807	0.152393	2.8279	5.08157	5.08157	0.152393	2.8279	0.163807	0.0790727	-1.11064	5.28181	4.085	0.948622	0.378892	1.28576e-06	0.00339199	1	1	0.000855735	0.261374	gnl|BL_ORD_ID|199701 sp|Q9SSE9|JMJ25_ARATH Lysine-specific demethylase JMJ25 OS=Arabidopsis thaliana OX=3702 GN=JMJ25 PE=1 SV=1//1.25737e-32
MS.gene32030	MS.gene32030	chr4.3:23664297-23666229	866	#N/A	#N/A	1.10644	1.05966	1.05966	0	1.10644	0	#N/A	-0.212138	9.83669	9.69286	#N/A	0.905843	5.79633e-05	0.00340797	#N/A	1	0.0186811	0.262346	gnl|BL_ORD_ID|185532 sp|P34913|HYES_HUMAN Bifunctional epoxide hydrolase 2 OS=Homo sapiens OX=9606 GN=EPHX2 PE=1 SV=2//6.05955e-33
MS.gene34350	MS.gene34350	chr4.3:89027930-89031844	1230	#N/A	#N/A	0.418677	0.831337	0.831337	0	0.418677	0	#N/A	-1.25835	10.5022	9.31285	#N/A	0.474365	8.06921e-06	0.00499252	#N/A	1	0.0040519	0.329423	gnl|BL_ORD_ID|520157 sp|Q9FZ45|Y1686_ARATH Uncharacterized membrane protein At1g16860 OS=Arabidopsis thaliana OX=3702 GN=At1g16860 PE=1 SV=1//3.52459e-22
MS.gene024634	MS.gene024634	chr5.1:3678645-3681999	1539	#N/A	#N/A	0.468481	0.486468	0.486468	0	0.468481	0	#N/A	-0.245585	9.50515	9.29814	#N/A	0.896344	0.000135964	0.00516945	#N/A	1	0.0335011	0.337193	gnl|BL_ORD_ID|162594 sp|O23736|GSH1_BRAJU Glutamate--cysteine ligase, chloroplastic OS=Brassica juncea OX=3707 GN=GSH1 PE=1 SV=1//0
MS.gene64337	MS.gene64337	chr5.2:39796501-39827685	1290	#N/A	#N/A	0.045452	0.090928	0.090928	0	0.045452	0	#N/A	-1.18715	10.3046	9.1569	#N/A	0.503666	1.52024e-05	0.00590088	#N/A	1	0.00666653	0.363356	gnl|BL_ORD_ID|306387 sp|Q39032|PLCD1_ARATH Phosphoinositide phospholipase C 1 OS=Arabidopsis thaliana OX=3702 GN=PLC1 PE=2 SV=1//1.37637e-156
MS.gene024439	MS.gene024439	chr7.2:915264-917142	1068	0	0.0504645	0.552082	2.52763	2.52763	0.0504645	0.552082	0	-5.39542	-2.45553	5.70879	8.6606	0.15063	0.158495	0.000195569	0.0096294	1	1	0.0424664	0.476191	gnl|BL_ORD_ID|30834 sp|P0CH01|AT21A_ARATH Putative RING-H2 finger protein ATL21A OS=Arabidopsis thaliana OX=3702 GN=ATL21A PE=3 SV=1//1.95908e-50
MS.gene24531	MS.gene24531	chr1.2:5843442-5850591	1752	0.0494965	0	7.09428	5.13499	5.13499	0	7.09428	0.0494965	7.13156	0.268925	13.9939	7.15717	0.0532486	0.919533	7.61752e-05	0.0116643	1	1	0.0227985	0.524851	gnl|BL_ORD_ID|120563 sp|Q8VY07|EPN1_ARATH Clathrin interactor EPSIN 1 OS=Arabidopsis thaliana OX=3702 GN=EPSIN1 PE=1 SV=1//8.31168e-138
MS.gene015704	MS.gene015704	chr4.4:2430817-2433476	1336	#N/A	#N/A	0.329549	8.58824	8.58824	0	0.329549	0	#N/A	-4.95099	13.306	8.41735	#N/A	0.0624118	0.000125934	0.01217	#N/A	1	0.0319393	0.537772	gnl|BL_ORD_ID|426855 sp|Q9C9T2|SARD1_ARATH Protein SAR DEFICIENT 1 OS=Arabidopsis thaliana OX=3702 GN=SARD1 PE=1 SV=1//1.3733e-121
MS.gene48408	-	chr3.1:79734662-79742300	2133	#N/A	#N/A	0.213501	0.803182	0.803182	0	0.213501	0	#N/A	-2.16651	10.477	8.3749	#N/A	0.225455	1.78244e-05	0.012611	#N/A	1	0.00750895	0.546872	gnl|BL_ORD_ID|249408 sp|Q8L7W1|MSL3_ARATH Mechanosensitive ion channel protein 3, chloroplastic OS=Arabidopsis thaliana OX=3702 GN=MSL3 PE=1 SV=1//0
MS.gene006940	MS.gene006940	chr4.4:28046736-28052409	858	0.031781	0	2.40964	3.02676	3.02676	0	2.40964	0.031781	6.20525	-0.526171	12.8977	6.19542	0.113655	0.835135	0.000166121	0.0157581	1	1	0.0384076	0.623362	gnl|BL_ORD_ID|446347 sp|Q39221|STLP2_ARATH SEC12-like protein 2 OS=Arabidopsis thaliana OX=3702 GN=STL2P PE=1 SV=4//2.99761e-89
MS.gene07427	MS.gene07427	chr1.2:63769725-63773181	1104	#N/A	#N/A	0.160808	0.505416	0.505416	0	0.160808	0	#N/A	-1.82265	9.61113	7.82627	#N/A	0.313732	0.000124782	0.0220831	#N/A	1	0.0318586	0.747906	gnl|BL_ORD_ID|525584 sp|Q949P3|Y2734_ARATH Uncharacterized protein At2g17340 OS=Arabidopsis thaliana OX=3702 GN=At2g17340 PE=1 SV=1//0
MS.gene019629	MS.gene019629	chr8.2:67236623-67241566	684	#N/A	#N/A	0.0828335	1.3678	1.3678	0	0.0828335	0	#N/A	-4.19116	11.5523	7.39453	#N/A	0.040786	2.97347e-05	0.0332237	#N/A	0.882725	0.0111671	0.904293	gnl|BL_ORD_ID|205577 sp|Q64595|KGP2_RAT cGMP-dependent protein kinase 2 OS=Rattus norvegicus OX=10116 GN=Prkg2 PE=1 SV=1//3.81812e-09
MS.gene42647	MS.gene42647	chr3.4:92165167-92178048	5139	#N/A	#N/A	0.0291	1.07862	1.07862	0	0.0291	0	#N/A	-5.39644	12.5922	7.24306	#N/A	0.00129399	2.45265e-09	0.0382661	#N/A	0.143624	4.17992e-06	0.964284	gnl|BL_ORD_ID|92820 sp|Q5N870|DCL3A_ORYSJ Endoribonuclease Dicer homolog 3a OS=Oryza sativa subsp. japonica OX=39947 GN=DCL3A PE=2 SV=1//0
MS.gene57797	MS.gene57797	chr6.1:69481533-69612646	711	0.035974	0	0.075506	1.29858	1.29858	0	0.075506	0.035974	9.89993	-4.32752	15.4499	1.2549	0.00301124	0.047272	3.79332e-05	0.451658	0.313324	0.935567	0.0135883	1	-//-
MS.gene058519	MS.gene058519	50226:2160-5837	1089	2.00374	0	1.16996	8.02451	8.02451	0	1.16996	2.00374	11.494	-3.05516	13.6788	-0.814547	0.000659962	0.242667	9.3103e-05	0.737077	0.120337	1	0.0262462	1	gnl|BL_ORD_ID|246138 sp|Q39024|MPK4_ARATH Mitogen-activated protein kinase 4 OS=Arabidopsis thaliana OX=3702 GN=MPK4 PE=1 SV=2//0
MS.gene021568	MS.gene021568	chr1.4:9967626-9970441	1233	4.22967	0	10.1761	9.32534	9.32534	0	10.1761	4.22967	12.1522	-0.0965753	13.5088	1.29916	0.000250813	0.911888	2.55277e-12	0.443159	0.0613697	1	1.47249e-08	1	gnl|BL_ORD_ID|345458 sp|Q8H1G5|REIL1_ARATH Cytoplasmic 60S subunit biogenesis factor REI1 homolog 1 OS=Arabidopsis thaliana OX=3702 GN=REIL1 PE=1 SV=1//3.65224e-34
MS.gene41885	MS.gene41885	chr7.2:20298757-20310932	3867	#N/A	#N/A	0.005585	2.01306	2.01306	0	0.005585	0	#N/A	-8.55541	13.4111	4.91243	#N/A	0.00222249	0.000110394	0.370692	#N/A	0.196166	0.0295999	1	gnl|BL_ORD_ID|28716 sp|Q9SG80|ASD1_ARATH Alpha-L-arabinofuranosidase 1 OS=Arabidopsis thaliana OX=3702 GN=ASD1 PE=1 SV=1//0
MS.gene94706	MS.gene94706	chr7.3:35914593-35918613	846	0.896474	0	2.01291	5.79118	5.79118	0	2.01291	0.896474	10.4293	-1.79373	13.3372	1.17577	0.00173918	0.366764	0.000116166	0.511981	0.22343	1	0.0306004	1	gnl|BL_ORD_ID|474052 sp|Q9SSN3|TIR_ARATH Toll/interleukin-1 receptor-like protein OS=Arabidopsis thaliana OX=3702 GN=TIR PE=1 SV=1//4.42347e-37
MS.gene072709	MS.gene072709	chr7.3:5574020-5579396	1005	#N/A	#N/A	0.0209195	4.11283	4.11283	0	0.0209195	0	#N/A	-7.76431	13.2624	5.54882	#N/A	0.00475069	0.000121798	0.220939	#N/A	0.303814	0.031442	1	gnl|BL_ORD_ID|103278 sp|Q9LZK5|DNJ19_ARATH DnaJ protein ERDJ3B OS=Arabidopsis thaliana OX=3702 GN=ERDJ3B PE=1 SV=1//2.1072e-179
MS.gene07891	-	chr8.3:70732393-70735426	807	1.54867	0	1.83213	12.1311	12.1311	0	1.83213	1.54867	9.93184	-2.64129	13.0648	0.512874	0.00350901	0.128354	9.15955e-11	0.833094	0.339445	1	2.67602e-07	1	gnl|BL_ORD_ID|68546 sp|P30187|CML10_ARATH Calmodulin-like protein 10 OS=Arabidopsis thaliana OX=3702 GN=CML10 PE=2 SV=1//7.09025e-06
MS.gene58031	MS.gene58031	chr8.3:11164975-11175236	2112	0.437505	0	1.77416	1.86562	1.86562	0	1.77416	0.437505	10.7457	-0.30493	13.054	2.0469	0.00122467	0.732539	3.21483e-11	0.212338	0.18084	1	1.13001e-07	1	gnl|BL_ORD_ID|260311 sp|Q7T322|NAA35_DANRE N-alpha-acetyltransferase 35, NatC auxiliary subunit OS=Danio rerio OX=7955 GN=naa35 PE=2 SV=1//8.07814e-55
MS.gene23656	MS.gene23656	chr8.1:67233922-67241667	3192	0.994645	0	0.895543	2.31072	2.31072	0	0.895543	0.994645	11.5598	-1.55572	12.9564	-0.141026	0.000606915	0.36935	4.91845e-11	0.954772	0.11366	1	1.58065e-07	1	gnl|BL_ORD_ID|311013 sp|Q99575|POP1_HUMAN Ribonucleases P/MRP protein subunit POP1 OS=Homo sapiens OX=9606 GN=POP1 PE=1 SV=2//1.77683e-08
MS.gene056995	MS.gene056995	chr2.1:5014896-5020941	1122	1.03699	0	0.696858	2.94844	2.94844	0	0.696858	1.03699	11.2268	-2.27171	12.9511	-0.518496	0.000721921	0.18672	6.99206e-11	0.827555	0.127362	1	2.09725e-07	1	gnl|BL_ORD_ID|479185 sp|F4IEY4|TRB5_ARATH Telomere repeat-binding factor 5 OS=Arabidopsis thaliana OX=3702 GN=At1g72740 PE=2 SV=1//4.54091e-14
MS.gene057173	MS.gene057173	chr8.1:20757095-20759524	1263	4.69788	0	24.2885	7.1505	7.1505	0	24.2885	4.69788	12.0903	1.53541	12.912	2.39507	0.00026984	0.204593	1.98443e-07	0.16407	0.0644297	1	0.000171677	1	gnl|BL_ORD_ID|206678 sp|Q8LBB2|KING1_ARATH SNF1-related protein kinase regulatory subunit gamma-1 OS=Arabidopsis thaliana OX=3702 GN=KING1 PE=1 SV=2//0
MS.gene026152	MS.gene026152	chr1.2:24533572-24538370	513	2.02118	0	0.900991	3.54496	3.54496	0	0.900991	2.02118	11.8565	-2.24292	12.8832	-1.15952	0.000350601	0.189846	8.79194e-11	0.626779	0.0772571	1	2.60241e-07	1	gnl|BL_ORD_ID|45667 sp|Q9LF68|BOLA4_ARATH Protein BOLA4, chloroplastic/mitochondrial OS=Arabidopsis thaliana OX=3702 GN=BOLA4 PE=1 SV=1//3.79907e-46
MS.gene034313	-	chr4.3:89884960-89892069	906	2.60584	0	8.17071	3.77143	3.77143	0	8.17071	2.60584	12.1216	0.883469	12.7951	1.58788	0.000260934	0.44274	8.18249e-08	0.352576	0.0628359	1	8.21756e-05	1	-//-
MS.gene028706	MS.gene028706	chr2.3:6988648-6993831	906	2.2559	0	2.80245	2.90471	2.90471	0	2.80245	2.2559	12.1597	-0.281346	12.7069	0.300161	0.000313997	0.755722	3.28656e-10	0.862336	0.0709723	1	7.94993e-07	1	gnl|BL_ORD_ID|143154 sp|Q6DBP8|GAT11_ARATH GATA transcription factor 11 OS=Arabidopsis thaliana OX=3702 GN=GATA11 PE=2 SV=1//2.09672e-45
MS.gene71673	MS.gene71673	chr1.1:77054241-77055623	1164	2.96275	0	6.95327	10.9001	10.9001	0	6.95327	2.96275	10.6464	-0.828415	12.7061	1.24224	0.00166693	0.741964	0.000218989	0.611794	0.217577	1	0.0457417	1	gnl|BL_ORD_ID|149227 sp|V5LLZ9|GGT_QUERO Gallate 1-beta-glucosyltransferase OS=Quercus robur OX=38942 GN=UGT84A13 PE=1 SV=1//4.05989e-99
MS.gene22899	MS.gene22899	chr7.3:1983940-1989335	3012	1.42466	0	1.34923	2.78139	2.78139	0	1.34923	1.42466	11.5215	-1.31312	12.7025	-0.0749239	0.000509871	0.447484	3.1135e-10	0.975847	0.0999071	1	7.6132e-07	1	gnl|BL_ORD_ID|57478 sp|P92948|CDC5L_ARATH Cell division cycle 5-like protein OS=Arabidopsis thaliana OX=3702 GN=CDC5 PE=1 SV=2//0
MS.gene55870	MS.gene55870	chr4.3:3673261-3681934	1329	1.61106	0	1.57473	1.71432	1.71432	0	1.57473	1.61106	12.3828	-0.39075	12.6887	-0.0285549	0.000195415	0.82532	4.21866e-10	0.99101	0.051693	1	9.76337e-07	1	gnl|BL_ORD_ID|142638 sp|Q8VYG2|GALAK_ARATH Galacturonokinase OS=Arabidopsis thaliana OX=3702 GN=GALAK PE=1 SV=1//0
MS.gene72369	MS.gene72369	chr8.3:21340347-21348270	963	1.49278	0	0.20334	1.85446	1.85446	0	0.20334	1.49278	12.1424	-3.38081	12.6736	-2.81774	0.000253583	0.0530584	3.2186e-09	0.245566	0.0615853	0.977639	5.20904e-06	1	gnl|BL_ORD_ID|494329 sp|Q8GXV5|UGHY_ARATH (S)-ureidoglycine aminohydrolase OS=Arabidopsis thaliana OX=3702 GN=UGLYAH PE=1 SV=1//3.73331e-152
MS.gene032098	MS.gene032098	chr2.3:16737242-16741367	1977	0.948438	0	2.44459	3.14449	3.14449	0	2.44459	0.948438	10.5492	-0.577252	12.4925	1.40045	0.00152277	0.551567	2.60333e-09	0.400839	0.206367	1	4.37049e-06	1	gnl|BL_ORD_ID|530732 sp|O81832|Y4729_ARATH G-type lectin S-receptor-like serine/threonine-protein kinase At4g27290 OS=Arabidopsis thaliana OX=3702 GN=At4g27290 PE=3 SV=4//6.22649e-170
MS.gene058735	MS.gene058735	chr1.1:14950904-14954213	927	1.92636	0	2.60155	3.72236	3.72236	0	2.60155	1.92636	11.2513	-0.751066	12.4191	0.460568	0.000702237	0.421717	2.21041e-09	0.784702	0.124793	1	3.85468e-06	1	gnl|BL_ORD_ID|87711 sp|Q43317|CYSK_CITLA Cysteine synthase OS=Citrullus lanatus OX=3654 PE=1 SV=1//5.77449e-171
MS.gene32893	MS.gene32893	chr3.3:84924657-84927695	1053	2.02069	0	0.78535	4.04399	4.04399	0	0.78535	2.02069	11.1978	-2.55413	12.415	-1.30723	0.000746998	0.137145	2.8787e-09	0.581092	0.130605	1	4.76171e-06	1	gnl|BL_ORD_ID|463685 sp|F4K4L7|TAF4B_ARATH Transcription initiation factor TFIID subunit 4b OS=Arabidopsis thaliana OX=3702 GN=TAF4B PE=1 SV=1//4.10854e-93
MS.gene33364	MS.gene33364	chr4.2:88085585-88090211	2556	1.46335	0	1.54821	2.59069	2.59069	0	1.54821	1.46335	11.3376	-0.973277	12.3774	0.107861	0.000638922	0.317478	5.15118e-09	0.950603	0.118053	1	7.82979e-06	1	gnl|BL_ORD_ID|182719 sp|Q9S7C0|HSP7O_ARATH Heat shock 70 kDa protein 14 OS=Arabidopsis thaliana OX=3702 GN=HSP70-14 PE=1 SV=1//0
MS.gene76159	MS.gene76159	chr2.3:4025282-4031486	3675	0.74429	0	0.429841	1.78868	1.78868	0	0.429841	0.74429	10.8199	-2.32277	12.2671	-0.828766	0.00139878	0.175722	4.9943e-09	0.730605	0.196258	1	7.69533e-06	1	gnl|BL_ORD_ID|13457 sp|Q9LNQ4|ALA4_ARATH Probable phospholipid-transporting ATPase 4 OS=Arabidopsis thaliana OX=3702 GN=ALA4 PE=3 SV=2//0
MS.gene058517	MS.gene058517	50223:43321-46943	1164	1.28786	0	7.34622	3.01521	3.01521	0	7.34622	1.28786	10.8338	1.07414	12.2453	2.51328	0.00136918	0.277014	7.05114e-09	0.147337	0.193569	1	1.01681e-05	1	gnl|BL_ORD_ID|302390 sp|A7PZL3|PGLR_VITVI Probable polygalacturonase OS=Vitis vinifera OX=29760 GN=GSVIVT00026920001 PE=1 SV=1//1.50704e-62
MS.gene029697	MS.gene029697	chr1.2:47226041-47233990	1974	0.81697	0	0.910372	1.10781	1.10781	0	0.910372	0.81697	11.3134	-0.472263	11.9346	0.167184	0.000815629	0.787526	2.315e-08	0.946054	0.138123	1	2.83034e-05	1	gnl|BL_ORD_ID|52975 sp|F4I2J8|CATIN_ARATH Cactin OS=Arabidopsis thaliana OX=3702 GN=CTN PE=1 SV=1//0
MS.gene29112	MS.gene29112	chr3.2:66082071-66086096	1843	0.688518	0	1.51223	2.1789	2.1789	0	1.51223	0.688518	10.0516	-0.755616	11.928	1.16291	0.0025919	0.443259	2.70441e-08	0.485813	0.286446	1	3.20203e-05	1	-//-
MS.gene06837	MS.gene06837	chr3.1:74458431-74464118	1161	1.15603	0	0.663673	1.51679	1.51679	0	0.663673	1.15603	11.3299	-1.46078	11.9043	-0.836794	0.000798316	0.398517	3.01923e-08	0.730169	0.136719	1	3.55558e-05	1	gnl|BL_ORD_ID|64080 sp|Q9S7N9|CID12_ARATH Polyadenylate-binding protein-interacting protein 12 OS=Arabidopsis thaliana OX=3702 GN=CID12 PE=1 SV=1//3.15655e-137
MS.gene016217	MS.gene016217	chr7.1:27863171-27869660	1511	1.36951	0	1.39342	1.31593	1.31593	0	1.39342	1.36951	11.7653	-0.175132	11.8904	-0.00391089	0.000491196	0.871928	5.27953e-08	0.998499	0.0974237	1	5.66711e-05	1	-//-
MS.gene51811	MS.gene51811	chr3.4:16099960-16104352	1155	0.768823	0	0.396236	1.56184	1.56184	0	0.396236	0.768823	10.3371	-2.24284	11.5738	-0.948624	0.00192527	0.191931	1.3836e-07	0.685883	0.236809	1	0.000126526	1	gnl|BL_ORD_ID|555762 sp|Q8AVN9|ZN346_XENLA Zinc finger protein 346 OS=Xenopus laevis OX=8355 GN=znf346 PE=1 SV=1//5.30044e-06
MS.gene64515	-	chr7.3:12621156-12624534	699	0.758893	0	1.22465	1.98089	1.98089	0	1.22465	0.758893	9.87915	-0.899799	11.4826	0.738319	0.00308005	0.407909	1.99181e-07	0.669523	0.316603	1	0.000171677	1	-//-
MS.gene002147	MS.gene002147	chr2.2:72113260-72115676	1218	0.649644	0	0.943358	2.58353	2.58353	0	0.943358	0.649644	9.25702	-1.65099	11.4377	0.552543	0.000245751	0.215045	5.32707e-06	0.659939	0.0608267	1	0.00290242	1	gnl|BL_ORD_ID|510647 sp|Q4PT23|WTR6_ARATH WAT1-related protein At1g25270 OS=Arabidopsis thaliana OX=3702 GN=At1g25270 PE=2 SV=1//4.94595e-85
MS.gene99725	MS.gene99725	chr5.2:62076095-62077193	723	0.664099	0	2.07769	4.79663	4.79663	0	2.07769	0.664099	8.17687	-1.44671	11.1925	1.61293	0.00282223	0.200011	6.7716e-07	0.219543	0.300684	1	0.00048407	1	gnl|BL_ORD_ID|110577 sp|Q9FGH9|E70B1_ARATH Exocyst complex component EXO70B1 OS=Arabidopsis thaliana OX=3702 GN=EXO70B1 PE=1 SV=1//2.80561e-36
MS.gene024122	MS.gene024122	chr7.1:23615233-23618015	1181	0.628266	0	1.05623	1.78517	1.78517	0	1.05623	0.628266	9.39205	-0.949354	11.112	0.800213	0.00517687	0.590886	1.10241e-06	0.734478	0.427427	1	0.000744742	1	gnl|BL_ORD_ID|31672 sp|A2Q1V6|ATG4_MEDTR Cysteine protease ATG4 OS=Medicago truncatula OX=3880 GN=ATG4 PE=3 SV=1//0
MS.gene38586	MS.gene38586	chr3.3:81851255-81857660	1334	0.434581	0	0.455852	0.772114	0.772114	0	0.455852	0.434581	10.0951	-0.952565	11.1061	0.0772997	0.00299088	0.588369	9.3746e-07	0.975795	0.311774	1	0.000646905	1	gnl|BL_ORD_ID|459837 sp|Q8RWT8|SYSM_ARATH Serine--tRNA ligase, chloroplastic/mitochondrial OS=Arabidopsis thaliana OX=3702 GN=OVA7 PE=2 SV=1//0
MS.gene78128	MS.gene78128	chr4.4:47651844-47658781	2229	0.002007	0	0.019457	0.704097	0.704097	0	0.019457	0.002007	3.04697	-5.35755	11.0865	2.69832	0.733881	0.0016553	1.38361e-06	0.400193	1	0.166195	0.000912774	1	-//-
MS.gene063484	-	chr8.4:18143842-18149757	429	#N/A	#N/A	0.008897	0.896921	0.896921	0	0.008897	0	#N/A	-6.61999	10.9962	4.4443	#N/A	0.000557018	1.64169e-05	0.489434	#N/A	0.0866901	0.0071022	1	gnl|BL_ORD_ID|510644 sp|Q9FGG3|WTR45_ARATH WAT1-related protein At5g64700 OS=Arabidopsis thaliana OX=3702 GN=At5g64700 PE=2 SV=1//2.73217e-29
MS.gene36993	-	chr8.2:76756796-76759743	321	1.85922	0	1.65154	2.24665	2.24665	0	1.65154	1.85922	10.1503	-0.649087	10.9499	0.178821	0.00234488	0.713544	1.68998e-06	0.940507	0.269406	1	0.00108622	1	gnl|BL_ORD_ID|371700 sp|C3PL27|RL30_CORA7 50S ribosomal protein L30 OS=Corynebacterium aurimucosum (strain ATCC 700975 / DSM 44827 / CN-1) OX=548476 GN=rpmD PE=3 SV=1//9.21043e-09
MS.gene034046	MS.gene034046	chr4.4:88169729-88174743	1269	0.425729	0	0.205816	0.800428	0.800428	0	0.205816	0.425729	9.70792	-2.14295	10.8047	-1.02905	0.00444174	0.221317	3.55039e-06	0.668062	0.390914	1	0.00206381	1	gnl|BL_ORD_ID|509270 sp|Q15061|WDR43_HUMAN WD repeat-containing protein 43 OS=Homo sapiens OX=9606 GN=WDR43 PE=1 SV=3//3.6594e-09
MS.gene07892	MS.gene07892	chr8.3:70716171-70719208	2388	0.100112	0	0.417127	1.31621	1.31621	0	0.417127	0.100112	6.93897	-1.85106	10.7974	2.02967	0.0632388	0.298544	4.77589e-06	0.398929	1	1	0.00265937	1	gnl|BL_ORD_ID|107077 sp|Q9SZ66|DSC1_ARATH Disease resistance-like protein DSC1 OS=Arabidopsis thaliana OX=3702 GN=DSC1 PE=1 SV=1//6.28829e-18
MS.gene87797	MS.gene87797	chr7.1:31066725-31068783	576	1.29941	0	1.61114	1.91902	1.91902	0	1.61114	1.29941	10.04	-0.442217	10.7787	0.313352	0.000474529	0.749399	1.56789e-05	0.843712	0.0948597	1	0.0068355	1	gnl|BL_ORD_ID|512030 sp|Q6NLW5|XRI1_ARATH Protein XRI1 OS=Arabidopsis thaliana OX=3702 GN=XRI1 PE=1 SV=2//4.258e-17
MS.gene77317	MS.gene77317	chr7.2:35974306-35975821	1131	0.47959	0	0.350461	2.58663	2.58663	0	0.350461	0.47959	8.14489	-3.08351	10.7692	-0.41904	0.00249943	0.0142771	3.75178e-06	0.772167	0.280251	0.541972	0.00215857	1	-//-
MS.gene064618	MS.gene064618	chr3.1:42106578-42110233	1602	0.108479	0	0.239228	1.06301	1.06301	0	0.239228	0.108479	7.32345	-2.40265	10.7569	1.0824	0.0109131	0.191624	1.88352e-05	0.579442	0.634721	1	0.0077889	1	gnl|BL_ORD_ID|207552 sp|F4JDI6|KN12F_ARATH Kinesin-like protein KIN-12F OS=Arabidopsis thaliana OX=3702 GN=KIN12F PE=3 SV=1//5.64556e-09
MS.gene021925	MS.gene021925	chr7.1:81462859-81468970	720	0.177453	0	0.202576	0.618788	0.618788	0	0.202576	0.177453	8.72226	-1.81501	10.717	0.214303	0.000712421	0.127479	4.05973e-06	0.867932	0.125881	1	0.00232979	1	-//-
MS.gene83102	MS.gene83102	chr1.2:16570900-16572305	1296	0.280207	0	0.382684	2.63521	2.63521	0	0.382684	0.280207	7.30403	-2.94759	10.6875	0.458855	0.0108273	0.0634965	8.2112e-05	0.777073	0.63184	1	0.0240207	1	gnl|BL_ORD_ID|48702 sp|Q8VWZ7|C76B6_CATRO Geraniol 8-hydroxylase OS=Catharanthus roseus OX=4058 GN=CYP76B6 PE=1 SV=1//1.27845e-163
MS.gene044050	MS.gene044050	chr1.2:4200969-4208875	2064	#N/A	#N/A	0.01657	0.466373	0.466373	0	0.01657	0	#N/A	-4.9499	10.6822	5.78585	#N/A	0.016285	0.000140054	0.178015	#N/A	0.577161	0.034	1	gnl|BL_ORD_ID|468943 sp|P85107|TGS1_RAT Trimethylguanosine synthase OS=Rattus norvegicus OX=10116 GN=Tgs1 PE=1 SV=1//6.81714e-67
MS.gene64667	MS.gene64667	chr5.2:67876490-67877285	477	0.379272	0	0.076397	4.41714	4.41714	0	0.076397	0.379272	6.96012	-5.98952	10.6128	-2.29997	0.0157257	0.00136781	2.76624e-05	0.235698	0.78315	0.148215	0.0105463	1	gnl|BL_ORD_ID|121369 sp|Q0JHU5|ERG1_ORYSJ Elicitor-responsive protein 1 OS=Oryza sativa subsp. japonica OX=39947 GN=ERG1 PE=1 SV=1//1.53592e-44
MS.gene058067	MS.gene058067	chr5.1:1579887-1581000	639	2.9558	0	4.33323	3.14789	3.14789	0	4.33323	2.9558	10.3296	0.245321	10.6073	0.551038	0.00235051	0.826064	6.45588e-06	0.752014	0.269734	1	0.00341721	1	-//-
MS.gene73191	-	chr8.1:23035991-23041068	1711	0.399979	0	0.574852	0.78981	0.78981	0	0.574852	0.399979	9.39205	-0.721688	10.5823	0.522941	0.00517691	0.690578	1.13138e-05	0.824668	0.427427	1	0.00523693	1	-//-
MS.gene29184	MS.gene29184	chr5.3:22350201-22353958	2007	0.289061	0	1.32163	0.88252	0.88252	0	1.32163	0.289061	8.73154	0.369611	10.5299	2.19713	0.000832346	0.74656	1.17111e-05	0.0680349	0.139717	1	0.00539861	1	gnl|BL_ORD_ID|555552 sp|Q5SVZ6|ZMYM1_HUMAN Zinc finger MYM-type protein 1 OS=Homo sapiens OX=9606 GN=ZMYM1 PE=1 SV=1//3.43478e-33
MS.gene62283	MS.gene62283	chr3.2:61423368-61424376	411	0.204394	0	0.18785	3.23995	3.23995	0	0.18785	0.204394	6.35678	-4.22278	10.5055	-0.0537148	0.0407494	0.0178248	0.000219515	1	1	0.60632	0.0458091	1	gnl|BL_ORD_ID|13516 sp|P62929|ALB1D_PEA Albumin-1 D OS=Pisum sativum OX=3888 PE=1 SV=1//1.79666e-16
MS.gene03553	-	chr3.4:30161523-30170509	1314	0.0254095	0	0.049602	0.434747	0.434747	0	0.049602	0.0254095	5.9078	-3.32997	10.4986	1.29016	0.156517	0.0116659	9.14194e-06	0.474768	1	0.489382	0.00444184	1	-//-
MS.gene61084	MS.gene61084	chr8.2:60065953-60072621	3029	0.143294	0	0.783945	0.4825	0.4825	0	0.783945	0.143294	8.52298	0.464364	10.4831	2.46573	0.0123251	0.665844	8.55093e-06	0.137341	0.681776	1	0.00421846	1	gnl|BL_ORD_ID|340985 sp|A9UL14|RBR_MEDSA Retinoblastoma-related protein OS=Medicago sativa OX=3879 GN=RBR PE=2 SV=1//0
MS.gene008703	MS.gene008703	chr3.4:59468943-59471597	1731	0.103724	0	0.239887	1.19238	1.19238	0	0.239887	0.103724	6.75592	-2.50005	10.4589	1.22482	0.0667058	0.0824067	2.42465e-05	0.513862	1	1	0.00948607	1	gnl|BL_ORD_ID|199479 sp|F4HQX1|JAL3_ARATH Jacalin-related lectin 3 OS=Arabidopsis thaliana OX=3702 GN=JAL3 PE=2 SV=1//6.42881e-28
MS.gene77386	MS.gene77386	chr7.1:32749136-32752684	300	0.0577825	0	0.482457	1.10079	1.10079	0	0.482457	0.0577825	6.06429	-1.38047	10.4428	3.01438	0.13196	0.355296	9.95235e-06	0.131418	1	1	0.00472338	1	gnl|BL_ORD_ID|436497 sp|I1N2Z5|SLE1_SOYBN Protein SLE1 OS=Glycine max OX=3847 GN=SLE1 PE=2 SV=1//5.21118e-27
MS.gene24520	MS.gene24520	chr1.1:5314413-5316559	522	0.705597	0	1.01467	1.44907	1.44907	0	1.01467	0.705597	9.18752	-0.707405	10.4387	0.571059	0.00632914	0.692761	1.01213e-05	0.807583	0.473386	1	0.00477232	1	gnl|BL_ORD_ID|79228 sp|F4IBD7|CSCLA_ARATH CSC1-like protein RXW8 OS=Arabidopsis thaliana OX=3702 GN=RXW8 PE=2 SV=1//3.78646e-58
MS.gene038656	MS.gene038656	chr8.3:39220214-39222807	969	0.198385	0	0.201203	1.15174	1.15174	0	0.201203	0.198385	7.6831	-2.69826	10.3761	0.0121388	0.00532489	0.114394	0.000199287	1	0.433222	1	0.0429409	1	gnl|BL_ORD_ID|191396 sp|Q84XG9|ILL1_ORYSI IAA-amino acid hydrolase ILR1-like 1 OS=Oryza sativa subsp. indica OX=39946 GN=ILL1 PE=2 SV=1//9.94743e-113
MS.gene41973	-	chr6.4:18116765-18120415	468	0.283971	0	0.549458	1.48208	1.48208	0	0.549458	0.283971	8.01654	-1.42215	10.3512	0.955135	0.00316868	0.316888	6.96831e-05	0.501956	0.321929	1	0.0215328	1	gnl|BL_ORD_ID|30949 sp|Q9MAA2|AT74_ARATH Phosphoglycerate mutase-like protein AT74 OS=Arabidopsis thaliana OX=3702 GN=At3g05170 PE=2 SV=1//4.46435e-11
MS.gene68301	MS.gene68301	chr5.2:26107980-26110199	1242	0.051836	0	0.398615	1.30302	1.30302	0	0.398615	0.051836	5.51366	-1.90707	10.3276	2.94843	0.144214	0.160299	2.59373e-05	0.0682074	1	1	0.0100255	1	gnl|BL_ORD_ID|491373 sp|O48676|U74B1_ARATH UDP-glycosyltransferase 74B1 OS=Arabidopsis thaliana OX=3702 GN=UGT74B1 PE=1 SV=1//2.5993e-111
MS.gene070034	MS.gene070034	chr4.3:76067954-76071025	2772	0.085503	0	0.283723	0.92959	0.92959	0	0.283723	0.085503	6.71687	-1.92572	10.3172	1.71645	0.0809061	0.122683	1.63299e-05	0.346772	1	1	0.00707818	1	gnl|BL_ORD_ID|348053 sp|Q7XBQ9|RGA2_SOLBU Disease resistance protein RGA2 OS=Solanum bulbocastanum OX=147425 GN=RGA2 PE=1 SV=1//1.63825e-75
MS.gene30144	-	chr3.3:42565523-42569010	240	0.432642	0	1.20788	0.902113	0.902113	0	1.20788	0.432642	8.89631	0.230552	10.2728	1.64496	0.00126342	0.837461	1.66789e-05	0.202003	0.184164	1	0.0071841	1	gnl|BL_ORD_ID|427915 sp|O82265|SCC3_ARATH Sister-chromatid cohesion protein 3 OS=Arabidopsis thaliana OX=3702 GN=SCC3 PE=1 SV=2//1.33541e-11
MS.gene064134	MS.gene064134	chr8.4:10780680-10790301	2016	0.27944	0	0.886031	0.285684	0.285684	0	0.886031	0.27944	10.0092	1.37004	10.2576	1.66948	0.00270817	0.293399	3.12901e-05	0.35642	0.293355	1	0.011654	1	gnl|BL_ORD_ID|437321 sp|B2ZFP3|SMAL1_DANRE SWI/SNF-related matrix-associated actin-dependent regulator of chromatin subfamily A-like protein 1 OS=Danio rerio OX=7955 GN=smarcal1 PE=2 SV=1//1.15467e-112
MS.gene46031	MS.gene46031	chr7.2:43167247-43171394	2598	0.0707845	0	0.14602	0.659594	0.659594	0	0.14602	0.0707845	6.91784	-2.36651	10.2502	0.990847	0.0208148	0.226483	0.000162491	0.627843	0.89911	1	0.0378406	1	gnl|BL_ORD_ID|417999 sp|Q6AVI0|RSLE2_ORYSJ Zinc finger BED domain-containing protein RICESLEEPER 2 OS=Oryza sativa subsp. japonica OX=39947 GN=Os03g0733400 PE=2 SV=1//8.61744e-94
MS.gene84690	-	chr2.3:49526710-49531995	489	0.458937	0	1.29423	0.600071	0.600071	0	1.29423	0.458937	9.08235	0.819267	10.1943	1.97749	0.00709694	0.459566	2.2452e-05	0.237828	0.505842	1	0.00897124	1	gnl|BL_ORD_ID|262521 sp|Q9SCL7|NAGK_ARATH Acetylglutamate kinase, chloroplastic OS=Arabidopsis thaliana OX=3702 GN=NAGK PE=1 SV=1//9.10091e-08
MS.gene054623	MS.gene054623	chr3.4:89276214-89278079	1227	#N/A	#N/A	0.0270085	1.3702	1.3702	0	0.0270085	0	#N/A	-5.78802	10.154	4.44425	#N/A	0.000942034	2.35935e-05	0.488439	#N/A	0.119223	0.00927587	1	gnl|BL_ORD_ID|306783 sp|O48723|PLP2_ARATH Patatin-like protein 2 OS=Arabidopsis thaliana OX=3702 GN=PLP2 PE=1 SV=1//0
MS.gene014321	MS.gene014321	chr3.4:98875744-98878961	1356	0.234401	0	0.624158	0.731518	0.731518	0	0.624158	0.234401	8.1932	-0.483604	10.0424	1.41389	0.00194026	0.69797	5.09822e-05	0.262575	0.237756	1	0.0170415	1	gnl|BL_ORD_ID|141012 sp|P12859|G3PB_PEA Glyceraldehyde-3-phosphate dehydrogenase B, chloroplastic OS=Pisum sativum OX=3888 GN=GAPB PE=1 SV=2//0
MS.gene89699	MS.gene89699	chr4.4:5016732-5019714	1695	0.562413	0	0.400618	0.781837	0.781837	0	0.400618	0.562413	9.36807	-1.23184	10.0229	-0.530882	0.00628735	0.486434	3.65937e-05	0.827356	0.472628	1	0.0132137	1	gnl|BL_ORD_ID|547147 sp|Q9P7J5|YJNA_SCHPO Uncharacterized AAA domain-containing protein C24B10.10c OS=Schizosaccharomyces pombe (strain 972 / ATCC 24843) OX=284812 GN=SPCC24B10.10c PE=3 SV=1//1.97628e-73
MS.gene020426	MS.gene020426	chr3.3:82784567-82801708	1386	0.0884345	0	0.204719	0.13473	0.13473	0	0.204719	0.0884345	9.18752	0.330758	10.0088	1.21024	0.00632859	0.85883	3.64519e-05	0.606816	0.473386	1	0.0131871	1	gnl|BL_ORD_ID|428361 sp|Q9C7Z9|SCP18_ARATH Serine carboxypeptidase-like 18 OS=Arabidopsis thaliana OX=3702 GN=SCPL18 PE=2 SV=2//1.57975e-164
MS.gene058629	MS.gene058629	chr3.1:2675054-2680022	2769	0.167249	0	0.41862	0.464628	0.464628	0	0.41862	0.167249	8.35463	-0.392361	10.0073	1.30388	0.0169154	0.751425	6.56091e-05	0.459983	0.810297	1	0.0204992	1	gnl|BL_ORD_ID|13452 sp|P98204|ALA1_ARATH Phospholipid-transporting ATPase 1 OS=Arabidopsis thaliana OX=3702 GN=ALA1 PE=2 SV=1//0
MS.gene034708	MS.gene034708	chr1.1:43406979-43409284	2016	0.767728	0	1.28715	0.974175	0.974175	0	1.28715	0.767728	9.41767	0.168723	9.97048	0.760859	0.00161506	0.888693	4.15001e-05	0.610292	0.214614	1	0.0145418	1	gnl|BL_ORD_ID|217242 sp|Q9FFJ8|LIMYB_ARATH L10-interacting MYB domain-containing protein OS=Arabidopsis thaliana OX=3702 GN=LIMYB PE=1 SV=1//1.34412e-09
MS.gene036790	MS.gene036790	chr8.1:12306157-12308297	645	0.486005	0	1.57454	1.0183	1.0183	0	1.57454	0.486005	8.67678	0.390903	9.92816	1.68153	0.0124756	0.739688	7.05599e-05	0.327998	0.687792	1	0.0216256	1	-//-
MS.gene053293	MS.gene053293	chr1.4:2101146-2110907	1845	0.0307875	0	0.075241	0.220477	0.220477	0	0.075241	0.0307875	6.88689	-1.72767	9.91163	1.32242	0.0577868	0.341528	7.23373e-05	0.574625	1	1	0.0220203	1	gnl|BL_ORD_ID|2362 sp|Q54XC1|5NTC_DICDI Cytosolic purine 5&apos;-nucleotidase OS=Dictyostelium discoideum OX=44689 GN=nt5c2 PE=3 SV=1//3.38555e-71
MS.gene044549	MS.gene044549	chr8.1:14496850-14500562	636	0.286689	0	0.824779	0.560091	0.560091	0	0.824779	0.286689	8.70798	0.326875	9.85551	1.51177	0.00172148	0.779454	5.66127e-05	0.249211	0.222194	1	0.018389	1	gnl|BL_ORD_ID|443841 sp|Q84J78|SSBP_ARATH Single-stranded DNA-binding protein, mitochondrial OS=Arabidopsis thaliana OX=3702 GN=At4g11060 PE=2 SV=1//1.7729e-14
MS.gene045530	MS.gene045530	31015:12325-25358	1897	0.0822855	0	0.083665	0.157658	0.157658	0	0.083665	0.0822855	8.71745	-1.18084	9.84011	-0.00926444	0.0119841	0.511196	6.45373e-05	1	0.671409	1	0.0202487	1	gnl|BL_ORD_ID|490247 sp|O25225|TYPA_HELPY GTP-binding protein TypA/BipA homolog OS=Helicobacter pylori (strain ATCC 700392 / 26695) OX=85962 GN=typA PE=3 SV=1//3.43787e-156
MS.gene28156	MS.gene28156	chr4.4:9705739-9706615	408	0.208038	0	0.93847	2.23306	2.23306	0	0.93847	0.208038	6.20525	-1.42986	9.7671	2.15503	0.113655	0.428979	8.87297e-05	0.362935	1	1	0.0254445	1	gnl|BL_ORD_ID|510443 sp|Q93WU9|WRK51_ARATH Probable WRKY transcription factor 51 OS=Arabidopsis thaliana OX=3702 GN=WRKY51 PE=1 SV=1//1.10828e-11
MS.gene71082	MS.gene71082	chr6.1:18359995-18362625	771	0.238365	0	1.25851	0.718286	0.718286	0	1.25851	0.238365	7.95832	0.577449	9.72664	2.38065	0.00325919	0.629272	0.000109267	0.0541884	0.327338	1	0.0294381	1	gnl|BL_ORD_ID|207537 sp|Q8VWI7|KN10A_ARATH Kinesin-like protein KIN-10A OS=Arabidopsis thaliana OX=3702 GN=KIN10A PE=1 SV=1//1.33022e-26
MS.gene72438	MS.gene72438	chr8.3:20509890-20513880	1446	0.181894	0	0.196704	0.474359	0.474359	0	0.196704	0.181894	8.16184	-1.46223	9.7232	0.116815	0.0202059	0.416399	8.19485e-05	0.967109	0.884183	1	0.0240041	1	gnl|BL_ORD_ID|156378 sp|Q9FFN2|GLYT3_ARATH Probable glycosyltransferase At5g03795 OS=Arabidopsis thaliana OX=3702 GN=At5g03795 PE=3 SV=2//4.92874e-98
MS.gene048479	MS.gene048479	chr3.3:51905214-51908012	1782	0.0979425	0	0.10768	0.671247	0.671247	0	0.10768	0.0979425	6.75592	-2.79134	9.70682	0.190638	0.0667041	0.0545465	0.000179429	0.932052	1	0.983104	0.0402003	1	gnl|BL_ORD_ID|199479 sp|F4HQX1|JAL3_ARATH Jacalin-related lectin 3 OS=Arabidopsis thaliana OX=3702 GN=JAL3 PE=2 SV=1//1.26412e-27
MS.gene95808	MS.gene95808	chr1.1:73935600-73943284	1110	0.0166785	0	0.135782	0.239972	0.239972	0	0.135782	0.0166785	5.73216	-1.04221	9.6881	2.93245	0.176201	0.420188	0.000155402	0.0877252	1	1	0.0364918	1	gnl|BL_ORD_ID|548918 sp|P53750|YN93_YEAST Uncharacterized hydrolase YNR064C OS=Saccharomyces cerevisiae (strain ATCC 204508 / S288c) OX=559292 GN=YNR064C PE=3 SV=1//8.75342e-09
MS.gene029638	MS.gene029638	chr5.4:37006579-37013488	1869	0.159553	0	0.0615505	0.260369	0.260369	0	0.0615505	0.159553	8.73448	-2.25705	9.65134	-1.31509	0.00996112	0.229715	0.000226283	0.578191	0.605217	1	0.0466586	1	-//-
MS.gene98458	MS.gene98458	chr5.4:18828113-18838001	2070	0.059593	0	0.157747	0.175506	0.175506	0	0.157747	0.059593	7.84818	-0.396393	9.59582	1.39358	0.00373906	0.750297	0.000106646	0.272918	0.351559	1	0.0289746	1	gnl|BL_ORD_ID|198841 sp|Q9C7A2|ITN1_ARATH Ankyrin repeat-containing protein ITN1 OS=Arabidopsis thaliana OX=3702 GN=ITN1 PE=1 SV=1//1.21151e-08
MS.gene063118	MS.gene063118	chr3.4:99887877-99890453	1410	0.264684	0	0.671991	0.661098	0.661098	0	0.671991	0.264684	8.05178	-0.161794	9.56855	1.38183	0.0191885	0.932167	0.000123473	0.555189	0.862664	1	0.0316	1	gnl|BL_ORD_ID|108195 sp|Q9T0J6|DUS3L_ARATH tRNA-dihydrouridine(47) synthase [NAD(P)(+)]-like OS=Arabidopsis thaliana OX=3702 GN=At4g38890 PE=1 SV=2//3.52177e-145
MS.gene049977	MS.gene049977	chr5.3:52200256-52214438	2652	0.039055	0	0.0339865	0.118871	0.118871	0	0.0339865	0.039055	7.76817	-1.9712	9.55363	-0.157178	0.00406575	0.148733	0.000131835	0.917581	0.370615	1	0.032807	1	gnl|BL_ORD_ID|81435 sp|Q05609|CTR1_ARATH Serine/threonine-protein kinase CTR1 OS=Arabidopsis thaliana OX=3702 GN=CTR1 PE=1 SV=1//0
MS.gene80526	MS.gene80526	chr6.3:36647613-36650057	1578	0.0226695	0	0.249116	0.674724	0.674724	0	0.249116	0.0226695	4.67499	-1.6207	9.52658	3.21488	0.395023	0.220946	0.000127922	0.0752107	1	1	0.0322617	1	gnl|BL_ORD_ID|48784 sp|Q43068|C82A1_PEA Cytochrome P450 82A1 (Fragment) OS=Pisum sativum OX=3888 GN=CYP82A1 PE=2 SV=2//0
MS.gene46054	MS.gene46054	chr7.2:42863225-42864938	675	0.249687	0	0.261941	0.95822	0.95822	0	0.261941	0.249687	7.42465	-2.05238	9.51892	0.0833113	0.00718868	0.116986	0.000130495	0.960676	0.50922	1	0.0326906	1	gnl|BL_ORD_ID|163329 sp|P32110|GSTX6_SOYBN Probable glutathione S-transferase OS=Glycine max OX=3847 GN=HSP26-A PE=2 SV=1//5.15388e-105
MS.gene030028	MS.gene030028	chr5.2:77254103-77260046	2418	0.190112	0	0.142336	0.27614	0.27614	0	0.142336	0.190112	8.79558	-1.1704	9.51664	-0.415212	0.000641422	0.393313	0.000232946	0.759707	0.118375	1	0.0477584	1	gnl|BL_ORD_ID|493373 sp|Q9FPT1|UBP12_ARATH Ubiquitin carboxyl-terminal hydrolase 12 OS=Arabidopsis thaliana OX=3702 GN=UBP12 PE=1 SV=2//2.23146e-50
MS.gene028936	MS.gene028936	chr2.3:10589928-10596022	1551	0.083775	0	0.113598	0.263091	0.263091	0	0.113598	0.083775	7.65487	-1.41933	9.48877	0.44475	0.00600678	0.283074	0.00021242	0.750725	0.461401	1	0.0449117	1	gnl|BL_ORD_ID|341628 sp|Q8RY59|RCD1_ARATH Inactive poly [ADP-ribose] polymerase RCD1 OS=Arabidopsis thaliana OX=3702 GN=RCD1 PE=1 SV=1//1.50458e-16
MS.gene004134	MS.gene004134	chr4.2:42866233-42869168	1191	0.220033	0	0.181906	0.540238	0.540238	0	0.181906	0.220033	7.98626	-1.79866	9.47122	-0.271918	0.0027722	0.170619	0.00017315	0.84398	0.29838	1	0.0394248	1	gnl|BL_ORD_ID|294296 sp|Q9SIB6|PBL6_ARATH Probable serine/threonine-protein kinase PBL6 OS=Arabidopsis thaliana OX=3702 GN=PBL6 PE=2 SV=1//3.95572e-92
MS.gene061273	MS.gene061273	chr8.3:6932166-6939033	2977	0.063136	0	0.127221	0.223917	0.223917	0	0.127221	0.063136	7.40647	-1.07751	9.42957	0.999557	0.0358821	0.558229	0.000231085	0.666389	1	1	0.0474747	1	gnl|BL_ORD_ID|132501 sp|F4JC20|FIPS3_ARATH FIP1[III]-like protein OS=Arabidopsis thaliana OX=3702 GN=FIPS3 PE=1 SV=1//3.14097e-20
MS.gene41296	MS.gene41296	chr1.2:31790381-31796915	630	0.143828	0	0.095775	0.234466	0.234466	0	0.095775	0.143828	8.52468	-1.4867	9.42782	-0.567204	0.0144369	0.419258	0.000222653	0.813922	0.744661	1	0.046292	1	gnl|BL_ORD_ID|58202 sp|Q6F3A6|CDPKA_ORYSJ Calcium-dependent protein kinase 10 OS=Oryza sativa subsp. japonica OX=39947 GN=CPK10 PE=2 SV=1//9.73789e-32
MS.gene05869	MS.gene05869	chr4.4:3474486-3482668	1218	0.190109	0	0.153425	0.187843	0.187843	0	0.153425	0.190109	9.25144	-0.514172	9.4275	-0.304397	0.000193934	0.676263	0.000170079	0.801387	0.0514204	1	0.0388437	1	gnl|BL_ORD_ID|289179 sp|Q0JLP9|P2C06_ORYSJ Probable protein phosphatase 2C 6 OS=Oryza sativa subsp. japonica OX=39947 GN=Os01g0583100 PE=1 SV=1//2.42756e-91
MS.gene36010	MS.gene36010	chr6.2:23790164-23794633	2352	0.178927	0	0.113238	0.332829	0.332829	0	0.113238	0.178927	8.27507	-1.80032	9.37604	-0.644335	0.0157757	0.31391	0.000190681	0.780749	0.784124	1	0.0419312	1	gnl|BL_ORD_ID|301421 sp|Q61282|PGCA_MOUSE Aggrecan core protein OS=Mus musculus OX=10090 GN=Acan PE=1 SV=2//8.93098e-06
MS.gene58330	MS.gene58330	chr8.2:65816281-65820020	579	0.357254	0	0.0749685	0.378022	0.378022	0	0.0749685	0.357254	9.03957	-2.51811	9.30529	-2.22995	0.00868727	0.156956	0.000224957	0.362075	0.562934	1	0.0465792	1	-//-
MS.gene060308	MS.gene060308	chr1.2:79828332-79829471	675	2.08677	0	0.273311	1.2048	1.2048	0	0.273311	2.08677	9.84434	-2.32966	9.26922	-2.87636	0.000427425	0.19112	0.000246385	0.149158	0.0891001	1	0.049889	1	gnl|BL_ORD_ID|46993 sp|C0HJG8|BSP_BOSSE Basic secretory protease (Fragments) OS=Boswellia serrata OX=613112 PE=1 SV=1//9.62845e-13
MS.gene48380	MS.gene48380	chr8.3:17130658-17135739	1473	3.98719	0.0154705	2.34749	6.2887	6.2887	0.0154705	2.34749	3.98719	7.84986	-1.61029	8.73404	-0.752452	0.00405208	0.362582	1.83753e-08	0.765189	0.370516	1	2.30934e-05	1	gnl|BL_ORD_ID|300319 sp|Q9FXT6|PEX14_ARATH Peroxisomal membrane protein PEX14 OS=Arabidopsis thaliana OX=3702 GN=PEX14 PE=1 SV=2//3.76229e-111
MS.gene061205	MS.gene061205	chr8.2:2491202-2492943	294	1.99593	0.0278455	4.34305	8.64173	8.64173	0.0278455	4.34305	1.99593	6.10895	-1.17994	8.46512	1.13125	0.023168	0.496839	9.0881e-08	0.642522	0.945139	1	8.88862e-05	1	-//-
MS.gene030022	MS.gene030022	chr5.2:77203328-77207812	992	0.611452	0.0039535	0.97958	1.42072	1.42072	0.0039535	0.97958	0.611452	6.50261	-0.629843	8.23766	1.1226	0.0164811	0.722371	9.65567e-06	0.63351	0.800523	1	0.00463143	1	-//-
MS.gene95605	MS.gene95605	chr7.4:34959353-34963203	1095	0.745532	0.07675	3.50553	15.0703	15.0703	0.07675	3.50553	0.745532	3.30648	-2.28417	7.89192	2.24612	0.0768588	0.256279	0.000120084	0.243383	1	1	0.0312302	1	gnl|BL_ORD_ID|99576 sp|Q9SRM3|DIOX6_ARATH Probable 2-oxoglutarate-dependent dioxygenase At3g111800 OS=Arabidopsis thaliana OX=3702 GN=At3g11180 PE=2 SV=1//4.18704e-173
MS.gene071974	MS.gene071974	chr2.4:74982148-74984625	1218	0.61729	0.0132395	0.925083	2.79038	2.79038	0.0132395	0.925083	0.61729	5.23962	-1.79232	7.64287	0.58901	0.00627361	0.175732	0.000125511	0.637019	0.472628	1	0.0319393	1	gnl|BL_ORD_ID|510647 sp|Q4PT23|WTR6_ARATH WAT1-related protein At1g25270 OS=Arabidopsis thaliana OX=3702 GN=At1g25270 PE=2 SV=1//4.94595e-85
MS.gene001050	MS.gene001050	chr5.4:2340677-2342388	1092	0.422643	0.021479	1.30485	4.37421	4.37421	0.021479	1.30485	0.422643	3.87088	-1.92279	7.45365	1.63179	0.0451243	0.212923	0.000127661	0.299935	1	1	0.0322318	1	gnl|BL_ORD_ID|286468 sp|B9FSC8|OPR11_ORYSJ Putative 12-oxophytodienoate reductase 11 OS=Oryza sativa subsp. japonica OX=39947 GN=OPR11 PE=2 SV=1//0
MS.gene00561	MS.gene00561	chr1.4:5704174-5705625	564	0.524199	0.0107445	1.00461	2.08235	2.08235	0.0107445	1.00461	0.524199	5.13364	-1.31923	7.36584	0.905342	0.0649416	0.385464	0.00011545	0.665891	1	1	0.0304832	1	gnl|BL_ORD_ID|259123 sp|Q9FKL2|MYB36_ARATH Transcription factor MYB36 OS=Arabidopsis thaliana OX=3702 GN=MYB36 PE=1 SV=1//2.07236e-13
XLOC_000038	XLOC_000038	10167:2014-5096	3047	2.03906	0.0171755	0.779806	2.54251	2.54251	0.0171755	0.779806	2.03906	6.72703	-1.88313	7.27031	-1.37012	0.0109482	0.222348	0.000127073	0.50473	0.635828	1	0.0321557	1	-
MS.gene024418	-	chr7.2:698794-702496	339	0.847734	0.01944	2.09702	2.00323	2.00323	0.01944	2.09702	0.847734	5.35552	-0.161172	6.86859	1.32786	0.0151584	0.877767	7.20178e-05	0.336177	0.764919	1	0.0219527	1	gnl|BL_ORD_ID|472304 sp|Q9LYY2|TI143_ARATH Mitochondrial import inner membrane translocase subunit TIM14-3 OS=Arabidopsis thaliana OX=3702 GN=TIM14-3 PE=1 SV=1//1.64444e-46
MS.gene024840	MS.gene024840	chr5.1:1386688-1388406	1071	1.01694	0.085312	3.01963	8.25096	8.25096	0.085312	3.01963	1.01694	3.57857	-1.64198	6.84658	1.58021	0.0536798	0.174298	5.36516e-05	0.227083	1	1	0.0176712	1	gnl|BL_ORD_ID|286468 sp|B9FSC8|OPR11_ORYSJ Putative 12-oxophytodienoate reductase 11 OS=Oryza sativa subsp. japonica OX=39947 GN=OPR11 PE=2 SV=1//0
MS.gene81723	MS.gene81723	chr1.3:43873966-43876183	1065	0.054653	0.0131135	0.0546235	1.47955	1.47955	0.0131135	0.0546235	0.054653	1.73675	-4.89451	6.57138	-0.0665104	0.607753	0.00433684	0.000224352	1	1	0.289519	0.0465164	1	gnl|BL_ORD_ID|148250 sp|Q9LZS7|GDL71_ARATH GDSL esterase/lipase At5g03610 OS=Arabidopsis thaliana OX=3702 GN=At5g03610 PE=2 SV=1//3.78767e-112
MS.gene47056	-	chr6.3:15268744-15286488	405	0.222492	0.0122065	0.462477	0.836433	0.836433	0.0122065	0.462477	0.222492	4.16303	-1.25803	6.51518	1.06602	0.02016	0.225381	0.000125852	0.320876	0.883867	1	0.0319393	1	-//-
MS.gene05887	MS.gene05887	chr4.4:3310097-3313466	762	1.08031	0.0217205	0.650177	1.65818	1.65818	0.0217205	0.650177	1.08031	5.48876	-1.59247	6.38765	-0.711129	0.0305684	0.167066	0.000218946	0.693877	1	1	0.0457417	1	gnl|BL_ORD_ID|43423 sp|Q6NPC9|BIN3D_ARATH Probable RNA methyltransferase At5g51130 OS=Arabidopsis thaliana OX=3702 GN=At5g51130 PE=2 SV=1//1.3186e-106
MS.gene061487	MS.gene061487	chr6.1:77164725-77165225	501	12.1307	0.326027	13.4056	24.596	24.596	0.326027	13.4056	12.1307	5.033	-1.10105	6.30448	0.155104	0.000249163	0.247242	4.15537e-06	0.873878	0.0612296	1	0.00237257	1	gnl|BL_ORD_ID|475791 sp|Q40392|TMVRN_NICGU TMV resistance protein N OS=Nicotiana glutinosa OX=35889 GN=N PE=1 SV=1//3.65773e-41
MS.gene36569	MS.gene36569	chr8.4:75868693-75873144	2328	0.877127	0.021316	1.22526	1.59203	1.59203	0.021316	1.22526	0.877127	5.19738	-0.588873	6.28166	0.479147	0.0458189	0.578093	0.00023956	0.785802	1	1	0.0487704	1	gnl|BL_ORD_ID|520559 sp|P59278|Y1745_ARATH Uncharacterized protein At1g51745 OS=Arabidopsis thaliana OX=3702 GN=At1g51745 PE=2 SV=2//2.38206e-18
MS.gene040116	-	chr4.4:291555-293205	387	5.63446	0.160172	1.4972	11.7615	11.7615	0.160172	1.4972	5.63446	4.86935	-2.99566	6.27279	-1.63505	0.00373809	0.0788123	0.000148956	0.332887	0.351559	1	0.0354697	1	gnl|BL_ORD_ID|472497 sp|Q8LBM2|TIF5A_ARATH Protein TIFY 5A OS=Arabidopsis thaliana OX=3702 GN=TIFY5A PE=1 SV=1//1.53681e-20
MS.gene042200	MS.gene042200	chr8.2:2444684-2445100	417	0.963096	0.109542	2.62777	7.0851	7.0851	0.109542	2.62777	0.963096	3.05016	-1.64627	6.11692	1.40385	0.108871	0.174404	0.000191977	0.31359	1	1	0.0420018	1	-//-
MS.gene70281	MS.gene70281	chr4.1:9047120-9048590	951	4.58698	0.261632	7.38209	13.9963	13.9963	0.261632	7.38209	4.58698	4.06377	-1.10592	5.91054	0.706752	0.00306789	0.457977	0.000130315	0.600547	0.316335	1	0.032682	1	gnl|BL_ORD_ID|111945 sp|P93007|EF112_ARATH Ethylene-responsive transcription factor ERF112 OS=Arabidopsis thaliana OX=3702 GN=ERF112 PE=1 SV=1//1.58572e-30
XLOC_136222	XLOC_136222	chr3.4:31717405-31731099	3009	1.43129	0.086651	1.04294	4.88385	4.88385	0.086651	1.04294	1.43129	3.68986	-2.80409	5.75333	-0.759422	0.0228233	0.00908405	0.000204553	0.509508	0.940023	0.430918	0.0437548	1	-
MS.gene52680	MS.gene52680	chr7.2:15883459-15884551	849	5.68341	0.946228	2.41851	38.1376	38.1376	0.946228	2.41851	5.68341	2.50244	-4.16742	5.50733	-1.18471	0.0574065	0.00100947	2.96155e-06	0.380004	1	0.124649	0.00175787	1	gnl|BL_ORD_ID|512101 sp|Q38910|XTH23_ARATH Probable xyloglucan endotransglucosylase/hydrolase protein 23 OS=Arabidopsis thaliana OX=3702 GN=XTH23 PE=2 SV=1//6.00812e-151
MS.gene072450	-	chr7.3:3107590-3114153	228	1.61797	0.222992	1.63267	9.24434	9.24434	0.222992	1.63267	1.61797	2.66168	-2.69008	5.50682	0.120241	0.0242094	0.020052	2.72203e-06	0.915992	0.965708	0.638692	0.00163293	1	-//-
MS.gene21173	-	chr5.1:5761103-5772975	756	0.110933	0.184151	0.181315	1.5551	1.5551	0.184151	0.181315	0.110933	1.11724	-3.84207	5.44946	0.478726	0.434628	0.000241237	2.14691e-05	0.698531	1	0.0504446	0.00867089	1	gnl|BL_ORD_ID|164979 sp|Q8VZP6|GUX8_ARATH Putative glucuronosyltransferase PGSIP8 OS=Arabidopsis thaliana OX=3702 GN=PGSIP8 PE=2 SV=1//4.19192e-150
MS.gene30143	MS.gene30143	chr3.3:42537161-42542946	570	1.42724	0.0750675	2.17098	2.80368	2.80368	0.0750675	2.17098	1.42724	4.13722	-0.612291	5.37107	0.608756	0.00305285	0.548294	0.000104227	0.552085	0.315279	1	0.0285939	1	gnl|BL_ORD_ID|339923 sp|Q9FNR1|RBG3_ARATH Glycine-rich RNA-binding protein 3, mitochondrial OS=Arabidopsis thaliana OX=3702 GN=RBG3 PE=1 SV=1//3.82983e-33
MS.gene068618	MS.gene068618	chr5.1:21481643-21483224	1062	0.73272	0.13493	1.24187	4.58196	4.58196	0.13493	1.24187	0.73272	2.38199	-2.09939	5.27195	0.76358	0.122385	0.0542177	0.000206936	0.53377	1	0.980994	0.0441254	1	gnl|BL_ORD_ID|250955 sp|Q9ZRF1|MTDH_FRAAN Probable mannitol dehydrogenase OS=Fragaria ananassa OX=3747 GN=CAD PE=2 SV=1//1.18854e-171
MS.gene002117	MS.gene002117	chr2.3:74941441-74945519	1347	0.484052	0.0706995	1.43989	2.22831	2.22831	0.0706995	1.43989	0.484052	2.68481	-0.869785	5.12552	1.55883	0.0797084	0.381441	0.000111754	0.201081	1	1	0.0297612	1	-//-
MS.gene02687	MS.gene02687	chr3.3:86738718-86739419	702	2.11468	0.672808	2.627	17.3815	17.3815	0.672808	2.627	2.11468	1.56945	-2.91848	4.85085	0.337747	0.250132	0.0136691	0.000147056	0.791862	1	0.528713	0.035156	1	gnl|BL_ORD_ID|121215 sp|Q84QC2|ERF17_ARATH Ethylene-responsive transcription factor ERF017 OS=Arabidopsis thaliana OX=3702 GN=ERF017 PE=2 SV=1//5.12519e-28
MS.gene75712	-	chr3.3:70201394-70204129	867	8.35457	2.51057	7.38133	54.8149	54.8149	2.51057	7.38133	8.35457	2.11805	-2.54336	4.52118	-0.163507	0.0272975	0.0133227	2.11691e-05	0.863858	1	0.521114	0.00859602	1	gnl|BL_ORD_ID|195079 sp|Q9LHN9|IQM2_ARATH IQ domain-containing protein IQM2 OS=Arabidopsis thaliana OX=3702 GN=IQM2 PE=2 SV=1//5.90673e-156
MS.gene019495	MS.gene019495	chr8.1:69658395-69658949	555	9.90531	4.94354	8.36438	88.6567	88.6567	4.94354	8.36438	9.90531	0.967388	-3.61079	4.37459	-0.229391	0.387129	0.00139126	6.40101e-05	0.841069	1	0.149298	0.0201113	1	gnl|BL_ORD_ID|41117 sp|Q58FX0|BAP2_ARATH BON1-associated protein 2 OS=Arabidopsis thaliana OX=3702 GN=BAP2 PE=1 SV=1//5.59049e-09
MS.gene07332	MS.gene07332	chr1.4:69030425-69031524	801	2.74259	0.953619	3.27139	16.9543	16.9543	0.953619	3.27139	2.74259	1.4833	-2.5731	4.3612	0.277284	0.223864	0.0194216	9.81326e-05	0.814937	1	0.628965	0.0273555	1	gnl|BL_ORD_ID|259114 sp|Q10MB4|MYB2_ORYSJ Transcription factor MYB2 OS=Oryza sativa subsp. japonica OX=39947 GN=MYB2 PE=2 SV=1//1.35436e-74
MS.gene84222	-	chr7.1:33705140-33707367	552	8.57433	0.539883	4.98894	9.42319	9.42319	0.539883	4.98894	8.57433	3.92707	-1.1868	4.32608	-0.784038	0.000927595	0.420193	0.000121656	0.602274	0.151095	1	0.031442	1	-//-
XLOC_293796	XLOC_293796	chr8.1:20678244-20683031	1006	10.0774	2.54554	6.37109	47.5486	47.5486	2.54554	6.37109	10.0774	1.91368	-3.05909	4.31531	-0.683437	0.0391087	0.00353923	2.18323e-05	0.48198	1	0.258081	0.00877036	1	-
MS.gene02367	MS.gene02367	14705:45475-46746	1272	7.34889	2.25463	6.86982	35.7536	35.7536	2.25463	6.86982	7.34889	1.68025	-2.60096	4.21404	-0.089459	0.111666	0.00467283	5.17343e-05	0.922956	1	0.301673	0.0172417	1	gnl|BL_ORD_ID|129123 sp|O65451|FB333_ARATH Probable F-box protein At4g22030 OS=Arabidopsis thaliana OX=3702 GN=At4g22030 PE=4 SV=1//3.26116e-103
MS.gene045398	-	chr3.4:78536913-78539048	867	3.9724	1.5966	3.47953	29.6359	29.6359	1.5966	3.47953	3.9724	1.5165	-2.863	4.19609	-0.202873	0.155719	0.0039165	0.000114162	0.832426	1	0.273901	0.0302446	1	gnl|BL_ORD_ID|195079 sp|Q9LHN9|IQM2_ARATH IQ domain-containing protein IQM2 OS=Arabidopsis thaliana OX=3702 GN=IQM2 PE=2 SV=1//5.90673e-156
MS.gene58302	-	chr8.2:65513929-65521165	555	18.8623	3.63206	8.97486	57.5215	57.5215	3.63206	8.97486	18.8623	2.33148	-2.8819	4.1819	-1.05635	0.0165692	0.00455959	4.63212e-05	0.278585	0.803426	0.298541	0.0158365	1	gnl|BL_ORD_ID|41117 sp|Q58FX0|BAP2_ARATH BON1-associated protein 2 OS=Arabidopsis thaliana OX=3702 GN=BAP2 PE=1 SV=1//6.58214e-09
MS.gene81987	MS.gene81987	chr3.2:76698955-76700334	1029	4.1649	3.24117	5.45128	50.7592	50.7592	3.24117	5.45128	4.1649	0.303147	-3.41869	4.15362	0.409113	0.78819	0.00145417	0.00017954	0.704917	1	0.153044	0.0402003	1	gnl|BL_ORD_ID|510446 sp|Q9SUP6|WRK53_ARATH Probable WRKY transcription factor 53 OS=Arabidopsis thaliana OX=3702 GN=WRKY53 PE=1 SV=1//2.69148e-44
MS.gene043927	MS.gene043927	chr5.3:50527587-50528537	951	6.11937	2.7577	5.24931	41.3475	41.3475	2.7577	5.24931	6.11937	1.10745	-3.1878	4.11149	-0.206937	0.313468	0.00134066	9.88915e-05	0.841163	1	0.146806	0.0274898	1	gnl|BL_ORD_ID|124257 sp|Q9ZPE7|EXO_ARATH Protein EXORDIUM OS=Arabidopsis thaliana OX=3702 GN=EXO PE=2 SV=1//1.79199e-146
MS.gene39643	MS.gene39643	chr4.2:24672211-24672888	678	24.1302	11.7489	20.3672	169.327	169.327	11.7489	20.3672	24.1302	0.997075	-3.25666	4.04654	-0.232374	0.34582	0.002846	0.000127387	0.831942	1	0.227116	0.0321989	1	gnl|BL_ORD_ID|111943 sp|Q9SZ06|EF109_ARATH Ethylene-responsive transcription factor ERF109 OS=Arabidopsis thaliana OX=3702 GN=ERF109 PE=1 SV=1//1.08927e-29
MS.gene02362	MS.gene02362	14705:12735-14003	1269	9.76616	4.12865	10.6057	58.2666	58.2666	4.12865	10.6057	9.76616	1.206	-2.67908	4.03396	0.129064	0.214481	0.0029857	6.52854e-05	0.882382	1	0.233627	0.0204264	1	gnl|BL_ORD_ID|129123 sp|O65451|FB333_ARATH Probable F-box protein At4g22030 OS=Arabidopsis thaliana OX=3702 GN=At4g22030 PE=4 SV=1//1.16198e-110
MS.gene054049	MS.gene054049	chr1.3:13464485-13467879	2244	1.74123	0.555724	2.66254	7.42954	7.42954	0.555724	2.66254	1.74123	1.60408	-1.69379	3.96351	0.643745	0.207856	0.073863	0.000210612	0.567236	1	1	0.0446133	1	gnl|BL_ORD_ID|508858 sp|Q9LMP1|WAK2_ARATH Wall-associated receptor kinase 2 OS=Arabidopsis thaliana OX=3702 GN=WAK2 PE=1 SV=1//0
MS.gene57521	MS.gene57521	chr8.3:61917327-61917863	537	13.3324	6.41372	8.89588	84.9956	84.9956	6.41372	8.89588	13.3324	1.03753	-3.45305	3.96081	-0.564424	0.329573	0.00203053	0.000179353	0.607507	1	0.18581	0.0402003	1	gnl|BL_ORD_ID|41117 sp|Q58FX0|BAP2_ARATH BON1-associated protein 2 OS=Arabidopsis thaliana OX=3702 GN=BAP2 PE=1 SV=1//1.985e-28
MS.gene39646	MS.gene39646	chr4.2:24688061-24688765	705	12.3423	8.60056	16.056	116.547	116.547	8.60056	16.056	12.3423	0.477511	-3.058	3.96029	0.398517	0.652019	0.00679477	0.00016122	0.720048	1	0.368747	0.0376224	1	gnl|BL_ORD_ID|111943 sp|Q9SZ06|EF109_ARATH Ethylene-responsive transcription factor ERF109 OS=Arabidopsis thaliana OX=3702 GN=ERF109 PE=1 SV=1//7.64088e-28
MS.gene039108	-	chr2.2:23021569-23033424	237	14.9319	4.4097	15.2968	66.9828	66.9828	4.4097	15.2968	14.9319	1.45293	-2.32913	3.87421	0.0671899	0.0955132	0.0305296	8.37887e-05	0.946117	1	0.782836	0.0243529	1	-//-
XLOC_196029	XLOC_196029	chr5.2:54242586-54244026	1441	4.02327	2.74033	6.62055	34.6415	34.6415	2.74033	6.62055	4.02327	0.501172	-2.59763	3.86295	0.745208	0.65889	0.00690629	0.000212267	0.471903	1	0.371978	0.0449117	1	-
MS.gene02366	MS.gene02366	14705:40230-41522	1293	24.3249	6.28971	18.3678	77.5059	77.5059	6.28971	18.3678	24.3249	1.93777	-2.29178	3.86187	-0.394457	0.0378905	0.0124268	0.000109242	0.651069	1	0.504588	0.0294381	1	gnl|BL_ORD_ID|129123 sp|O65451|FB333_ARATH Probable F-box protein At4g22030 OS=Arabidopsis thaliana OX=3702 GN=At4g22030 PE=4 SV=1//6.22642e-105
MS.gene02361	-	chr2.4:63468656-63528299	648	5.91705	2.60164	5.90933	33.0119	33.0119	2.60164	5.90933	5.91705	1.10717	-2.69326	3.83756	0.0181238	0.279247	0.00373675	0.000192161	0.985035	1	0.265454	0.0420018	1	gnl|BL_ORD_ID|129123 sp|O65451|FB333_ARATH Probable F-box protein At4g22030 OS=Arabidopsis thaliana OX=3702 GN=At4g22030 PE=4 SV=1//1.67275e-62
MS.gene39645	MS.gene39645	chr4.2:24684015-24684641	627	24.9967	15.1745	36.9513	182.21	182.21	15.1745	36.9513	24.9967	0.695871	-2.51162	3.81279	0.579238	0.45136	0.0100432	0.000131237	0.530962	1	0.455589	0.0327728	1	gnl|BL_ORD_ID|111943 sp|Q9SZ06|EF109_ARATH Ethylene-responsive transcription factor ERF109 OS=Arabidopsis thaliana OX=3702 GN=ERF109 PE=1 SV=1//2.75899e-25
MS.gene26632	MS.gene26632	chr4.1:23591502-23592128	627	32.9594	19.5923	44.2886	232.463	232.463	19.5923	44.2886	32.9594	0.728808	-2.5994	3.79987	0.44461	0.417058	0.00947776	0.000138643	0.630922	1	0.441431	0.0339013	1	gnl|BL_ORD_ID|111943 sp|Q9SZ06|EF109_ARATH Ethylene-responsive transcription factor ERF109 OS=Arabidopsis thaliana OX=3702 GN=ERF109 PE=1 SV=1//2.75899e-25
MS.gene042437	-	chr6.2:81975463-82029983	1458	3.2374	0.729249	1.8172	6.75496	6.75496	0.729249	1.8172	3.2374	2.14499	-2.16514	3.63253	-0.709059	0.0233588	0.0372745	0.000186008	0.487011	0.949381	0.852304	0.0413073	1	gnl|BL_ORD_ID|223375 sp|F4HQ20|LRL25_ARATH LEAF RUST 10 DISEASE-RESISTANCE LOCUS RECEPTOR-LIKE PROTEIN KINASE-like 2.5 OS=Arabidopsis thaliana OX=3702 GN=LRK10L-2.5 PE=3 SV=1//5.90074e-79
MS.gene04998	MS.gene04998	chr3.3:58676709-58678028	1320	71.1294	21.393	38.9546	226.198	226.198	21.393	38.9546	71.1294	1.70686	-2.73975	3.63252	-0.843734	0.0412553	0.00549966	0.000111095	0.345278	1	0.327759	0.0297168	1	gnl|BL_ORD_ID|326263 sp|Q5PNY6|PUB21_ARATH U-box domain-containing protein 21 OS=Arabidopsis thaliana OX=3702 GN=PUB21 PE=2 SV=1//6.06995e-93
MS.gene045276	MS.gene045276	chr3.4:79690355-79698647	2433	2.50082	3.02828	0.0569665	0.0127205	0.0127205	3.02828	0.0569665	2.50082	-0.317135	1.93613	-7.63178	-5.39674	0.790903	0.322517	1.44977e-06	0.000215425	1	1	0.000948079	0.042347	gnl|BL_ORD_ID|30672 sp|F4HRV8|ASY1_ARATH Meiosis-specific protein ASY1 OS=Arabidopsis thaliana OX=3702 GN=ASY1 PE=1 SV=1//0
MS.gene93859	MS.gene93859	chr1.2:77945926-77951232	1044	1.46449	1.6108	0.0134835	0	0	1.6108	0.0134835	1.46449	-0.218187	4.88184	-11.7202	-6.68511	0.85712	0.402388	2.44946e-06	3.17065e-05	1	1	0.00148526	0.0102351	gnl|BL_ORD_ID|63884 sp|Q3UHX9|CI114_MOUSE Putative methyltransferase C9orf114 homolog OS=Mus musculus OX=10090 GN=Spout1 PE=1 SV=1//2.60025e-83
MS.gene038244	MS.gene038244	chr5.4:71446629-71447669	1041	2.1746	5.44244	0.009497	0.0062695	0.0062695	5.44244	0.009497	2.1746	-1.34824	-0.421448	-7.74465	-6.7918	0.235456	1	6.31234e-06	0.000230454	1	1	0.00334911	0.0443291	gnl|BL_ORD_ID|270989 sp|Q55BF2|NMD3_DICDI 60S ribosomal export protein NMD3 OS=Dictyostelium discoideum OX=44689 GN=nmd3 PE=3 SV=1//4.73408e-31
MS.gene78678	MS.gene78678	chr8.4:56982254-56983645	876	4.91363	10.0243	0.023935	0	0	10.0243	0.023935	4.91363	-1.07059	4.10719	-12.3772	-7.28701	0.300168	0.585328	2.56465e-09	2.02145e-05	1	1	4.33792e-06	0.00725708	gnl|BL_ORD_ID|230004 sp|O64518|MCA5_ARATH Metacaspase-5 OS=Arabidopsis thaliana OX=3702 GN=AMC5 PE=1 SV=1//1.64087e-18
XLOC_261473	XLOC_261473	chr7.1:79857377-79861030	1425	0.376902	1.60495	#N/A	#N/A	0	1.60495	0	0.376902	-2.12417	#N/A	-11.1479	-9.08971	0.0732065	#N/A	1.3997e-06	0.000134106	1	#N/A	0.00092069	0.0304294	-
XLOC_306020	XLOC_306020	chr8.2:58273989-58276473	2485	0.675411	0.728584	#N/A	#N/A	0	0.728584	0	0.675411	-0.143882	#N/A	-9.42934	-9.35473	0.913323	#N/A	0.000163324	0.000121189	1	#N/A	0.0379559	0.0284339	-
MS.gene02794	MS.gene02794	15007:4564-8359	2181	0.528418	0.585549	#N/A	#N/A	0	0.585549	0	0.528418	-0.154331	#N/A	-9.7072	-9.62881	0.905065	#N/A	9.01586e-05	2.76733e-05	1	#N/A	0.0256735	0.00917388	gnl|BL_ORD_ID|138247 sp|Q9S793|FRS8_ARATH Protein FAR1-RELATED SEQUENCE 8 OS=Arabidopsis thaliana OX=3702 GN=FRS8 PE=2 SV=2//0
XLOC_167093	XLOC_167093	chr4.3:85653749-85655257	911	1.39359	1.66117	#N/A	#N/A	0	1.66117	0	1.39359	-0.285111	#N/A	-9.91035	-9.69607	0.816342	#N/A	4.94039e-05	2.30686e-05	1	#N/A	0.0166376	0.00799913	-
MS.gene004473	MS.gene004473	chr2.4:66537090-66543229	4077	0.45818	1.14772	#N/A	#N/A	0	1.14772	0	0.45818	-1.36001	#N/A	-11.3858	-10.0938	0.2876	#N/A	3.02261e-07	8.00066e-05	1	#N/A	0.000246365	0.0210332	gnl|BL_ORD_ID|422297 sp|F4JY37|RUK_ARATH Serine/threonine-protein kinase RUNKEL OS=Arabidopsis thaliana OX=3702 GN=RUK PE=1 SV=1//0
MS.gene89602	MS.gene89602	chr8.3:27212760-27217070	3336	1.39793	0.936066	#N/A	#N/A	0	0.936066	0	1.39793	0.524311	#N/A	-10.63	-11.2213	0.701426	#N/A	2.62559e-05	3.48518e-06	1	#N/A	0.0101313	0.00177457	gnl|BL_ORD_ID|468205 sp|P0CT39|TF26_SCHPO Transposon Tf2-6 polyprotein OS=Schizosaccharomyces pombe (strain 972 / ATCC 24843) OX=284812 GN=Tf2-6 PE=3 SV=1//5.45854e-97
MS.gene062153	MS.gene062153	chr1.3:30511937-30521797	2762	0.954897	1.04885	0	0.009409	0.009409	1.04885	0	0.954897	-0.174441	-5.44538	-6.49432	-11.8251	0.919456	0.267533	0.000119492	0.000272788	1	1	0.0311481	0.0499248	gnl|BL_ORD_ID|493357 sp|Q9ZSB5|UBP10_ARATH Ubiquitin carboxyl-terminal hydrolase 10 OS=Arabidopsis thaliana OX=3702 GN=UBP10 PE=2 SV=2//0
MS.gene070896	MS.gene070896	chr5.4:21661666-21667841	1254	1.5372	1.20334	#N/A	#N/A	0	1.20334	0	1.5372	0.341018	#N/A	-11.4416	-11.8594	0.728139	#N/A	3.25955e-07	1.82523e-09	1	#N/A	0.000262225	2.73447e-06	gnl|BL_ORD_ID|116253 sp|Q54EY2|EI2BB_DICDI Translation initiation factor eIF-2B subunit beta OS=Dictyostelium discoideum OX=44689 GN=eif2b2 PE=3 SV=1//1.42934e-91
MS.gene058120	MS.gene058120	chr5.4:3125525-3138180	2670	0.769969	0.68618	#N/A	#N/A	0	0.68618	0	0.769969	0.13982	#N/A	-11.67	-11.8823	0.897904	#N/A	1.02607e-07	4.46258e-08	1	#N/A	9.78071e-05	4.63537e-05	gnl|BL_ORD_ID|417940 sp|Q9SYH1|RSH3C_ARATH Probable GTP diphosphokinase RSH3, chloroplastic OS=Arabidopsis thaliana OX=3702 GN=RSH3 PE=2 SV=1//9.68192e-28
MS.gene22339	MS.gene22339	chr5.4:4356586-4363367	1014	1.51544	0.967082	#N/A	#N/A	0	0.967082	0	1.51544	0.625786	#N/A	-11.2794	-11.9795	0.524672	#N/A	4.61766e-07	1.59301e-09	1	#N/A	0.000354536	2.44938e-06	gnl|BL_ORD_ID|304704 sp|F4JYG0|PIAL2_ARATH E4 SUMO-protein ligase PIAL2 OS=Arabidopsis thaliana OX=3702 GN=PIAL2 PE=1 SV=1//1.82623e-93
MS.gene048650	MS.gene048650	chr7.2:16516450-16519538	1383	3.34801	3.11563	#N/A	#N/A	0	3.11563	0	3.34801	0.0916708	#N/A	-11.8162	-11.9843	0.923696	#N/A	4.94525e-08	9.19328e-10	1	#N/A	5.34848e-05	1.48178e-06	gnl|BL_ORD_ID|302390 sp|A7PZL3|PGLR_VITVI Probable polygalacturonase OS=Vitis vinifera OX=29760 GN=GSVIVT00026920001 PE=1 SV=1//3.87946e-12
MS.gene78673	MS.gene78673	chr8.4:56867696-56873720	1257	1.83729	4.44128	#N/A	#N/A	0	4.44128	0	1.83729	-1.3331	#N/A	-13.3329	-12.064	0.230318	#N/A	2.28768e-11	6.6946e-08	1	#N/A	8.72266e-08	6.6297e-05	gnl|BL_ORD_ID|348460 sp|Q84T03|RH27_ORYSJ DEAD-box ATP-dependent RNA helicase 27 OS=Oryza sativa subsp. japonica OX=39947 GN=Os03g0802700 PE=3 SV=1//3.62306e-72
MS.gene041965	MS.gene041965	chr8.2:50834944-50839878	1206	2.42235	4.13309	#N/A	#N/A	0	4.13309	0	2.42235	-0.725833	#N/A	-12.8497	-12.2133	0.73532	#N/A	0.000195381	8.51645e-06	1	#N/A	0.0424664	0.00366556	gnl|BL_ORD_ID|311907 sp|O49711|PP335_ARATH Pentatricopeptide repeat-containing protein At4g21880, mitochondrial OS=Arabidopsis thaliana OX=3702 GN=At4g21880 PE=3 SV=2//1.83243e-33
MS.gene09048	MS.gene09048	2949:12366-17177	1891	2.72828	1.87698	#N/A	#N/A	0	1.87698	0	2.72828	0.519659	#N/A	-11.7341	-12.3279	0.571596	#N/A	6.39706e-08	7.67824e-11	1	#N/A	6.75625e-05	1.56043e-07	-//-
MS.gene39027	MS.gene39027	chr7.4:19564909-19569967	854	2.576	1.10939	#N/A	#N/A	0	1.10939	0	2.576	1.24055	#N/A	-11.0106	-12.3372	0.513888	#N/A	6.7597e-06	0.000200985	1	#N/A	0.00355295	0.0405322	gnl|BL_ORD_ID|340004 sp|Q9LET3|RBL20_ARATH Rhomboid-like protein 20 OS=Arabidopsis thaliana OX=3702 GN=RBL20 PE=2 SV=1//4.62876e-142
MS.gene013120	MS.gene013120	chr3.3:82119711-82121727	857	6.77532	1.72035	#N/A	#N/A	0	1.72035	0	6.77532	1.93308	#N/A	-10.3874	-12.39	0.064004	#N/A	1.57922e-05	1.25139e-10	1	#N/A	0.00687158	2.41106e-07	gnl|BL_ORD_ID|43189 sp|Q9C7T4|BH096_ARATH Transcription factor bHLH96 OS=Arabidopsis thaliana OX=3702 GN=BHLH96 PE=1 SV=1//3.71028e-74
MS.gene86445	MS.gene86445	chr2.1:1423402-1431728	3876	1.98012	3.3366	#N/A	#N/A	0	3.3366	0	1.98012	-0.82049	#N/A	-13.3906	-12.633	0.641362	#N/A	2.45211e-11	0.000110294	1	#N/A	9.16818e-08	0.026712	gnl|BL_ORD_ID|230897 sp|F4I171|MD15A_ARATH Mediator of RNA polymerase II transcription subunit 15a OS=Arabidopsis thaliana OX=3702 GN=MED15A PE=1 SV=1//2.02368e-36
MS.gene033335	MS.gene033335	chr8.2:20472972-20476445	1164	6.45245	4.27501	#N/A	#N/A	0	4.27501	0	6.45245	0.602701	#N/A	-12.4169	-13.1012	0.541993	#N/A	1.80229e-08	2.39399e-13	1	#N/A	2.27777e-05	9.02427e-10	gnl|BL_ORD_ID|323235 sp|Q93Y35|PSMD6_ARATH 26S proteasome non-ATPase regulatory subunit 6 homolog OS=Arabidopsis thaliana OX=3702 GN=RPN7 PE=1 SV=1//0
MS.gene029814	MS.gene029814	chr1.3:46124206-46127149	1026	7.65724	7.01055	#N/A	#N/A	0	7.01055	0	7.65724	0.170438	#N/A	-12.8664	-13.1265	0.947287	#N/A	0.000191518	9.20232e-05	1	#N/A	0.0420018	0.023428	gnl|BL_ORD_ID|11004 sp|Q9LZG0|ADK2_ARATH Adenosine kinase 2 OS=Arabidopsis thaliana OX=3702 GN=ADK2 PE=1 SV=1//0
MS.gene67355	-	chr4.1:37226737-37230836	612	8.93464	4.29751	0	0.03674	0.03674	4.29751	0	8.93464	0.91678	-5.61789	-6.60896	-13.2039	0.362803	0.21187	0.000188508	1.49041e-13	1	1	0.0416596	5.90383e-10	-//-
MS.gene035344	MS.gene035344	32581:6079-12660	1605	4.6411	5.96903	#N/A	#N/A	0	5.96903	0	4.6411	-0.354608	#N/A	-13.7955	-13.5222	0.890657	#N/A	9.58191e-05	5.17546e-05	1	#N/A	0.0268771	0.0151385	gnl|BL_ORD_ID|16928 sp|Q84W92|ANM13_ARATH Probable histone-arginine methyltransferase 1.3 OS=Arabidopsis thaliana OX=3702 GN=PRMT13 PE=1 SV=3//0
MS.gene23931	MS.gene23931	chr3.1:88620440-88623875	2574	9.286	11.1014	#N/A	#N/A	0	11.1014	0	9.286	-0.276698	#N/A	-13.806	-13.6038	0.745599	#N/A	6.7132e-13	6.54811e-15	1	#N/A	4.87162e-09	4.0273e-11	gnl|BL_ORD_ID|59294 sp|Q9FGL5|CEPR1_ARATH Receptor protein-tyrosine kinase CEPR1 OS=Arabidopsis thaliana OX=3702 GN=CEPR1 PE=1 SV=1//0
MS.gene08829	MS.gene08829	chr4.2:13381616-13395504	2706	2.31351	1.71871	#N/A	#N/A	0	1.71871	0	2.31351	0.384226	#N/A	-13.1853	-13.6385	0.83791	#N/A	4.10292e-10	6.4918e-05	1	#N/A	9.61451e-07	0.018062	gnl|BL_ORD_ID|13132 sp|O81852|AKH2_ARATH Bifunctional aspartokinase/homoserine dehydrogenase 2, chloroplastic OS=Arabidopsis thaliana OX=3702 GN=AKHSDH2 PE=1 SV=1//0
MS.gene35998	MS.gene35998	chr6.2:24167078-24169760	1788	12.6802	8.35827	#N/A	#N/A	0	8.35827	0	12.6802	0.555896	#N/A	-13.0752	-13.6997	0.526839	#N/A	5.66176e-11	2.53002e-15	1	#N/A	1.74475e-07	1.68942e-11	gnl|BL_ORD_ID|436317 sp|Q9FLV9|SLAH3_ARATH S-type anion channel SLAH3 OS=Arabidopsis thaliana OX=3702 GN=SLAH3 PE=1 SV=1//0
MS.gene55801	MS.gene55801	chr4.3:4552982-4554408	429	6.24876	8.71658	#N/A	#N/A	0	8.71658	0	6.24876	-0.515414	#N/A	-12.2319	-11.7881	0.770438	#N/A	1.40278e-08	0.000369079	1	#N/A	1.84544e-05	0.0618338	gnl|BL_ORD_ID|32004 sp|Q9FL42|ATL69_ARATH Putative RING-H2 finger protein ATL69 OS=Arabidopsis thaliana OX=3702 GN=ATL69 PE=3 SV=1//1.31851e-06
MS.gene71731	MS.gene71731	chr1.1:77588023-77605483	4824	0.493455	1.07128	#N/A	#N/A	0	1.07128	0	0.493455	-1.11609	#N/A	-12.7776	-11.7413	0.52092	#N/A	2.37173e-10	0.000390088	1	#N/A	6.06301e-07	0.064203	gnl|BL_ORD_ID|227164 sp|A5D9C6|MAF1_BOVIN Repressor of RNA polymerase III transcription MAF1 homolog OS=Bos taurus OX=9913 GN=MAF1 PE=2 SV=1//1.47589e-24
MS.gene24525	MS.gene24525	8582:16408-18352	678	0.609201	1.85822	#N/A	#N/A	0	1.85822	0	0.609201	-1.59237	#N/A	-10.368	-8.85666	0.27956	#N/A	0.000107653	0.000443903	1	#N/A	0.0291427	0.0702407	gnl|BL_ORD_ID|178930 sp|A2Z1U1|HOX11_ORYSI Homeobox-leucine zipper protein HOX11 OS=Oryza sativa subsp. indica OX=39946 GN=HOX11 PE=2 SV=1//1.31089e-45
MS.gene51071	MS.gene51071	chr8.2:18060602-18062200	648	4.35773	12.829	#N/A	#N/A	0	12.829	0	4.35773	-1.54823	#N/A	-12.8574	-11.3907	0.532088	#N/A	0.000193436	0.000447858	1	#N/A	0.042207	0.0706275	-//-
MS.gene068860	MS.gene068860	chr8.4:6623722-6627273	761	1.94392	2.69251	#N/A	#N/A	0	2.69251	0	1.94392	-0.538699	#N/A	-11.8538	-11.3777	0.757082	#N/A	8.29822e-08	0.000456208	1	#N/A	8.26003e-05	0.0713434	gnl|BL_ORD_ID|347630 sp|Q8LFJ8|RFA2B_ARATH Replication protein A 32 kDa subunit B OS=Arabidopsis thaliana OX=3702 GN=RPA2B PE=2 SV=1//5.94253e-67
MS.gene98687	MS.gene98687	chr7.1:31524176-31530054	2244	0.141226	0.294438	#N/A	#N/A	0	0.294438	0	0.141226	-1.08011	#N/A	-9.38441	-8.37484	0.406976	#N/A	0.000209932	0.000767705	1	#N/A	0.0445532	0.101311	gnl|BL_ORD_ID|275261 sp|Q5RG82|NS1BA_DANRE Influenza virus NS1A-binding protein homolog A OS=Danio rerio OX=7955 GN=ivns1abpa PE=2 SV=1//1.74587e-24
MS.gene27373	MS.gene27373	chr6.4:51032526-51039715	2058	0.917114	1.72541	#N/A	#N/A	0	1.72541	0	0.917114	-1.00865	#N/A	-11.8258	-10.8733	0.629028	#N/A	5.96858e-05	0.000796099	1	#N/A	0.0191539	0.103658	gnl|BL_ORD_ID|69283 sp|Q9LD37|CNG20_ARATH Probable cyclic nucleotide-gated ion channel 20, chloroplastic OS=Arabidopsis thaliana OX=3702 GN=CNGC20 PE=2 SV=1//0
MS.gene50762	-	chr4.1:30794506-30865386	1071	0.894428	2.82052	0.015657	0.012998	0.012998	2.82052	0.015657	0.894428	-1.68247	-0.0873098	-8.75067	-7.14916	0.32355	1	1.83974e-05	0.000842801	1	1	0.00768501	0.107577	gnl|BL_ORD_ID|155262 sp|Q6K508|GLUD1_ORYSJ Glutelin type-D 1 OS=Oryza sativa subsp. japonica OX=39947 GN=GLUD1 PE=2 SV=1//3.93229e-31
MS.gene25237	MS.gene25237	51725:18832-27023	1215	0.633504	1.02462	#N/A	#N/A	0	1.02462	0	0.633504	-0.74491	#N/A	-11.684	-11.0075	0.682297	#N/A	6.34031e-07	0.000873433	1	#N/A	0.00046309	0.109926	gnl|BL_ORD_ID|339960 sp|Q8LB17|RBL15_ARATH Rhomboid-like protein 15 OS=Arabidopsis thaliana OX=3702 GN=RBL15 PE=1 SV=2//0
MS.gene30828	MS.gene30828	chr6.4:38068739-38076418	1440	0.466748	2.25538	#N/A	#N/A	0	2.25538	0	0.466748	-2.33061	#N/A	-12.7005	-10.434	0.165136	#N/A	5.588e-10	0.0012921	1	#N/A	1.23243e-06	0.143233	-//-
MS.gene045298	MS.gene045298	chr3.1:64722258-64732738	2807	0.353031	3.37546	#N/A	#N/A	0	3.37546	0	0.353031	-3.21057	#N/A	-13.6441	-10.5228	0.224294	#N/A	0.000106259	0.00147551	1	#N/A	0.0289045	0.154431	gnl|BL_ORD_ID|69109 sp|Q9FYG2|CMTA4_ARATH Calmodulin-binding transcription activator 4 OS=Arabidopsis thaliana OX=3702 GN=CAMTA4 PE=1 SV=1//0
MS.gene41735	MS.gene41735	chr7.2:22073092-22076066	1353	0.970666	7.82589	#N/A	#N/A	0	7.82589	0	0.970666	-3.10742	#N/A	-13.1736	-10.1226	0.219899	#N/A	0.000145211	0.00179791	1	#N/A	0.0348063	0.175666	gnl|BL_ORD_ID|465640 sp|B9DHQ0|TBA5_ARATH Tubulin alpha-5 chain OS=Arabidopsis thaliana OX=3702 GN=TUBA5 PE=1 SV=2//0
MS.gene066738	MS.gene066738	chr2.2:28276915-28283313	741	1.64241	7.67472	0.0234515	0	0	7.67472	0.0234515	1.64241	-2.32012	5.86554	-14.2497	-6.05015	0.176755	0.170631	3.45838e-07	0.00196329	1	1	0.000275885	0.185879	gnl|BL_ORD_ID|318278 sp|O48551|PSA6_SOYBN Proteasome subunit alpha type-6 OS=Glycine max OX=3847 GN=PAA1 PE=2 SV=2//3.43171e-172
MS.gene037287	MS.gene037287	chr1.1:79850790-79858601	1215	0.560005	1.523	0.0006585	0.0127595	0.0127595	1.523	0.0006585	0.560005	-1.45904	-3.44489	-6.58408	-8.59037	0.397821	0.267344	8.8435e-06	0.00255552	1	1	0.00432486	0.218535	gnl|BL_ORD_ID|340752 sp|Q5RC80|RBM39_PONAB RNA-binding protein 39 OS=Pongo abelii OX=9601 GN=RBM39 PE=2 SV=1//4.77094e-76
MS.gene015812	MS.gene015812	chr4.3:2833891-2835867	1125	1.73911	1.19152	0.113549	0	0	1.19152	0.113549	1.73911	0.535871	6.49826	-9.78522	-3.85244	0.646413	0.0287308	8.01235e-05	0.00282781	1	0.76371	0.0235924	0.233656	gnl|BL_ORD_ID|429241 sp|F4JNX2|SDEH4_ARATH Senescence/dehydration-associated protein At4g35985, chloroplastic OS=Arabidopsis thaliana OX=3702 GN=P85 PE=2 SV=1//5.44935e-60
MS.gene004807	MS.gene004807	chr1.4:61649255-61656309	1536	0.320178	0.26001	#N/A	#N/A	0	0.26001	0	0.320178	0.268825	#N/A	-9.4747	-9.81616	0.884223	#N/A	0.000183332	0.0030751	1	#N/A	0.0408963	0.246548	-//-
MS.gene04882	MS.gene04882	chr7.2:17163970-17168341	2328	0.474784	7.46994	#N/A	#N/A	0	7.46994	0	0.474784	-4.01102	#N/A	-13.6255	-9.6871	0.0211581	#N/A	1.07011e-11	0.00349895	0.906391	#N/A	4.62945e-08	0.266976	gnl|BL_ORD_ID|347956 sp|Q94A08|RFS2_ARATH Probable galactinol--sucrose galactosyltransferase 2 OS=Arabidopsis thaliana OX=3702 GN=RFS2 PE=2 SV=2//0
MS.gene063970	MS.gene063970	chr5.2:36216608-36235596	1842	0.0942225	0.145	#N/A	#N/A	0	0.145	0	0.0942225	-0.618279	#N/A	-9.98076	-9.44028	0.740147	#N/A	0.000143863	0.00368046	1	#N/A	0.0346436	0.275215	gnl|BL_ORD_ID|312120 sp|Q9LMX4|PPA1_ARATH Probable inactive purple acid phosphatase 1 OS=Arabidopsis thaliana OX=3702 GN=PAP1 PE=2 SV=1//0
MS.gene043644	MS.gene043644	chr3.2:44851701-44853677	337	0.899159	1.49575	#N/A	#N/A	0	1.49575	0	0.899159	-0.756358	#N/A	-10.143	-9.46283	0.675248	#N/A	2.45574e-05	0.00438152	1	#N/A	0.00954979	0.304222	gnl|BL_ORD_ID|448126 sp|P55857|SUMO1_ORYSJ Small ubiquitin-related modifier 1 OS=Oryza sativa subsp. japonica OX=39947 GN=SUMO1 PE=1 SV=1//2.04674e-54
XLOC_271437	XLOC_271437	chr7.2:76924252-76930024	5773	0.255541	1.6444	#N/A	#N/A	0	1.6444	0	0.255541	-2.70215	#N/A	-11.7867	-9.1567	0.113207	#N/A	9.26149e-08	0.00489183	1	#N/A	8.98045e-05	0.32535	-
MS.gene066784	MS.gene066784	chr5.2:67767945-67773314	2108	0.260093	1.97922	#N/A	#N/A	0	1.97922	0	0.260093	-2.94597	#N/A	-11.9621	-9.08532	0.0787882	#N/A	2.43014e-08	0.00530133	1	#N/A	2.92344e-05	0.342072	-//-
MS.gene49080	MS.gene49080	chr1.3:69512823-69513550	438	1.8591	4.41729	0.0521885	0	0	4.41729	0.0521885	1.8591	-1.228	4.10736	-10.2167	-4.97357	0.338346	0.58805	3.85524e-05	0.00546331	1	1	0.0137882	0.348079	gnl|BL_ORD_ID|345602 sp|P93788|REMO_SOLTU Remorin OS=Solanum tuberosum OX=4113 PE=1 SV=1//6.48738e-13
MS.gene011192	MS.gene011192	chr8.2:76723395-76732026	2432	0.173597	2.33289	#N/A	#N/A	0	2.33289	0	0.173597	-3.69424	#N/A	-12.8314	-9.22605	0.152944	#N/A	0.000199045	0.00554093	1	#N/A	0.0429409	0.351229	gnl|BL_ORD_ID|349099 sp|P93042|RHD3_ARATH Protein ROOT HAIR DEFECTIVE 3 OS=Arabidopsis thaliana OX=3702 GN=RHD3 PE=1 SV=1//0
MS.gene033488	MS.gene033488	chr7.2:25595807-25601449	825	3.02791	2.79349	0.138976	0	0	2.79349	0.138976	3.02791	0.0820237	8.19266	-12.5473	-4.44258	0.92873	0.0176131	8.57564e-10	0.00612594	1	0.601412	1.7538e-06	0.37062	gnl|BL_ORD_ID|41499 sp|Q42533|BCCP1_ARATH Biotin carboxyl carrier protein of acetyl-CoA carboxylase 1, chloroplastic OS=Arabidopsis thaliana OX=3702 GN=BCCP1 PE=1 SV=2//4.76845e-59
MS.gene40079	MS.gene40079	chr5.4:1040521-1046348	1000	0.21749	0.327508	#N/A	#N/A	0	0.327508	0	0.21749	-0.653913	#N/A	-9.53166	-8.94116	0.716719	#N/A	0.000150267	0.00614465	1	#N/A	0.0356207	0.371224	gnl|BL_ORD_ID|73321 sp|Q7X7S8|COLD1_ORYSJ GPCR-type G protein COLD1 OS=Oryza sativa subsp. japonica OX=39947 GN=COLD1 PE=1 SV=2//4.8637e-178
MS.gene004792	MS.gene004792	chr1.4:61434975-61437794	1728	0.490009	0.881262	#N/A	#N/A	0	0.881262	0	0.490009	-0.858601	#N/A	-9.88824	-9.1069	0.635717	#N/A	4.92808e-05	0.00629236	1	#N/A	0.016621	0.375304	-//-
MS.gene049575	MS.gene049575	chr3.2:58296586-58304865	1692	1.2085	3.15316	0.0751275	0.019963	0.019963	3.15316	0.0751275	1.2085	-1.39874	1.66487	-7.04884	-3.9963	0.24622	0.374825	1.04061e-05	0.00676	1	1	0.00485674	0.388934	gnl|BL_ORD_ID|91798 sp|Q6BY27|DBP2_DEBHA ATP-dependent RNA helicase DBP2 OS=Debaryomyces hansenii (strain ATCC 36239 / CBS 767 / JCM 1990 / NBRC 0083 / IGC 2968) OX=284592 GN=DBP2 PE=3 SV=1//1.56068e-115
MS.gene015373	MS.gene015373	chr5.4:7316901-7320331	1236	0.311211	0.61634	#N/A	#N/A	0	0.61634	0	0.311211	-1.024	#N/A	-9.65818	-8.69963	0.562311	#N/A	9.41447e-05	0.00790343	1	#N/A	0.0264735	0.424724	gnl|BL_ORD_ID|98657 sp|Q38946|DHE2_ARATH Glutamate dehydrogenase 2 OS=Arabidopsis thaliana OX=3702 GN=GDH2 PE=1 SV=1//0
MS.gene042579	MS.gene042579	chr6.3:21219556-21222623	882	0.325416	0.61483	#N/A	#N/A	0	0.61483	0	0.325416	-0.930203	#N/A	-9.45743	-8.6007	0.608603	#N/A	0.000222329	0.00878393	1	#N/A	0.0462676	0.450755	gnl|BL_ORD_ID|512122 sp|Q41638|XTHA_PHAAN Xyloglucan endotransglucosylase/hydrolase protein A OS=Phaseolus angularis OX=3914 GN=XTHA PE=1 SV=1//0
MS.gene57642	MS.gene57642	chr8.3:4340896-4345820	1581	1.00191	1.00238	0.043765	0	0	1.00238	0.043765	1.00191	-0.0604201	6.46637	-10.9333	-4.43276	0.972434	0.0337237	8.56848e-05	0.00902156	1	0.8184	0.0246807	0.457264	gnl|BL_ORD_ID|65266 sp|Q9LTS3|CKX3_ARATH Cytokinin dehydrogenase 3 OS=Arabidopsis thaliana OX=3702 GN=CKX3 PE=1 SV=1//0
MS.gene016823	MS.gene016823	chr5.2:73917343-73927470	2313	0.092834	0.494005	#N/A	#N/A	0	0.494005	0	0.092834	-2.41806	#N/A	-10.8814	-8.5445	0.167124	#N/A	2.22208e-06	0.0110319	1	#N/A	0.0013733	0.509646	gnl|BL_ORD_ID|487603 sp|Q39238|TSL_ARATH Serine/threonine-protein kinase TOUSLED OS=Arabidopsis thaliana OX=3702 GN=TOUSLED PE=1 SV=1//0
MS.gene007489	MS.gene007489	chr7.4:9585169-9588428	1347	0.469624	0.59848	0.0193725	0	0	0.59848	0.0193725	0.469624	-0.377239	4.88182	-9.55193	-4.35865	0.761364	0.401981	0.000123293	0.0116348	1	1	0.03159	0.523931	gnl|BL_ORD_ID|354195 sp|P49163|RK22_MEDSA 50S ribosomal protein L22, chloroplastic OS=Medicago sativa OX=3879 GN=rpl22 PE=2 SV=1//4.71197e-114
MS.gene92695	MS.gene92695	chr3.1:23255035-23257472	651	0.243615	1.11528	#N/A	#N/A	0	1.11528	0.000832	0.243615	-2.2421	#N/A	-10.0701	-5.59216	0.162555	#N/A	0.000192004	0.0128677	1	#N/A	0.0420018	0.554764	-//-
MS.gene029271	MS.gene029271	chr1.4:86779883-86787162	912	1.21847	1.48876	0.07243	0	0	1.48876	0.07243	1.21847	-0.30531	7.62678	-11.9956	-4.07403	0.748573	0.0299091	1.89396e-08	0.0128831	1	0.775122	2.36703e-05	0.554764	-//-
MS.gene01593	MS.gene01593	chr2.2:67081074-67090409	3231	0.213372	0.186093	0.010302	0	0	0.186093	0.010302	0.213372	0.164652	5.38288	-9.37589	-4.21585	0.898427	0.275063	0.000187028	0.0133614	1	1	0.041452	0.567124	gnl|BL_ORD_ID|527851 sp|C0LGP4|Y3475_ARATH Probable LRR receptor-like serine/threonine-protein kinase At3g47570 OS=Arabidopsis thaliana OX=3702 GN=At3g47570 PE=2 SV=1//2.68049e-16
MS.gene20717	MS.gene20717	chr1.2:66421286-66431964	3720	5.58193	7.65247	0.717211	0.25905	0.25905	7.65247	0.717211	5.58193	-0.498081	1.23904	-4.65202	-2.93093	0.656872	0.239227	8.12728e-06	0.0137384	1	1	0.00407197	0.576301	gnl|BL_ORD_ID|31116 sp|Q7ZZ25|ATD1A_DANRE ATPase family AAA domain-containing protein 1-A OS=Danio rerio OX=7955 GN=atad1a PE=2 SV=2//1.87958e-70
XLOC_326190	XLOC_326190	chr8.4:65489568-65495531	5964	0.713021	1.02141	0.029625	0.0031845	0.0031845	1.02141	0.029625	0.713021	-0.575696	2.83858	-7.89636	-4.52686	0.643751	0.325148	1.17795e-05	0.0139781	1	1	0.00541904	0.583028	-
MS.gene033415	MS.gene033415	chr8.4:22701938-22706726	1239	0.164888	1.0508	#N/A	#N/A	0	1.0508	0	0.164888	-2.6349	#N/A	-10.8401	-8.29486	0.184138	#N/A	6.34646e-05	0.0141632	1	#N/A	0.0200826	0.586392	gnl|BL_ORD_ID|441388 sp|Q5FVD6|SPG21_XENLA Maspardin OS=Xenopus laevis OX=8355 GN=spg21 PE=2 SV=1//6.41528e-70
MS.gene37460	MS.gene37460	chr3.4:91081649-91084583	1719	3.38038	4.64441	0.319463	0.144226	0.144226	4.64441	0.319463	3.38038	-0.488185	0.871875	-4.73851	-3.38173	0.659115	0.574498	0.00019921	0.0151274	1	1	0.0429409	0.608199	gnl|BL_ORD_ID|17529 sp|Q38914|ANT_ARATH AP2-like ethylene-responsive transcription factor ANT OS=Arabidopsis thaliana OX=3702 GN=ANT PE=1 SV=2//6.25709e-130
MS.gene25032	MS.gene25032	chr8.1:77335776-77339427	342	0.180695	0.71583	#N/A	#N/A	0	0.71583	0	0.180695	-2.01985	#N/A	-9.96286	-8.00742	0.247241	#N/A	4.08087e-05	0.0159237	1	#N/A	0.0143443	0.626027	gnl|BL_ORD_ID|64682 sp|P83372|CISY_FRAAN Citrate synthase, mitochondrial OS=Fragaria ananassa OX=3747 GN=MCSI PE=1 SV=1//2.85272e-08
MS.gene87054	MS.gene87054	chr7.4:32125266-32127464	450	3.90267	3.52663	0.191008	0	0	3.52663	0.191008	3.90267	0.0821848	7.31896	-11.5871	-4.35004	0.958429	0.0404233	4.24781e-05	0.0187168	1	0.882446	0.0148113	0.685715	-//-
MS.gene85395	MS.gene85395	chr2.1:47941475-47949072	2992	0.0107135	0.89959	0.694103	0	0	0.89959	0.694103	0.0107135	-6.24113	11.0109	-11.4021	5.84724	0.00132443	0.00105725	1.76085e-05	0.0188322	0.189385	0.128055	0.00743192	0.687813	gnl|BL_ORD_ID|13794 sp|Q8RWW0|ALE2_ARATH Receptor-like serine/threonine-protein kinase ALE2 OS=Arabidopsis thaliana OX=3702 GN=ALE2 PE=1 SV=1//2.79733e-117
MS.gene24171	MS.gene24171	chr1.2:1049592-1050704	225	0.539031	3.1297	#N/A	#N/A	0	3.1297	0	0.539031	-2.50704	#N/A	-10.346	-7.92405	0.162575	#N/A	1.74146e-05	0.0203197	1	#N/A	0.00742097	0.717503	-//-
MS.gene002947	MS.gene002947	chr2.4:64048349-64052628	876	0.399863	0.461577	0.032961	0	0	0.461577	0.032961	0.399863	-0.230849	5.90469	-9.5513	-3.44483	0.860257	0.0723792	0.000118982	0.0231533	1	1	0.0310549	0.764186	gnl|BL_ORD_ID|503155 sp|P42055|VDAC1_SOLTU Mitochondrial outer membrane protein porin of 34 kDa OS=Solanum tuberosum OX=4113 PE=1 SV=2//5.83906e-108
MS.gene055749	MS.gene055749	chr4.4:42343384-42345975	1950	7.6867	3.1079	0.728171	0	0	3.1079	0.728171	7.6867	1.268	9.45266	-11.5933	-3.41589	0.172754	0.00514555	1.55263e-07	0.0379849	1	0.315403	0.000139712	0.96098	gnl|BL_ORD_ID|182628 sp|P27322|HSP72_SOLLC Heat shock cognate 70 kDa protein 2 OS=Solanum lycopersicum OX=4081 GN=HSC-2 PE=2 SV=1//0
MS.gene88230	MS.gene88230	chr4.4:49365969-49374267	2235	0.639374	3.37279	1.93156	0.182597	0.182597	3.37279	1.93156	0.639374	-2.41763	3.12413	-3.96606	1.56694	0.0176363	0.0190824	0.000234897	0.210099	0.828262	0.625163	0.0479514	1	gnl|BL_ORD_ID|430031 sp|Q54U61|SEC24_DICDI Protein transport protein SEC24 OS=Dictyostelium discoideum OX=44689 GN=sec24 PE=3 SV=1//2.69082e-19
MS.gene32756	MS.gene32756	chr3.1:83046780-83068682	4533	2.00964	3.25674	0.690816	0.165543	0.165543	3.25674	0.690816	2.00964	-0.699429	1.83059	-4.04337	-1.53832	0.435381	0.0663758	0.000119724	0.0825213	1	1	0.0311725	1	gnl|BL_ORD_ID|259675 sp|Q0WPU1|MYO15_ARATH Myosin-15 OS=Arabidopsis thaliana OX=3702 GN=XI-I PE=1 SV=1//0
MS.gene61253	MS.gene61253	chr8.2:23001977-23007040	825	19.0188	25.19	12.5014	0.339832	0.339832	25.19	12.5014	19.0188	-0.298345	3.67648	-4.51	-0.569178	0.73043	0.070442	5.64347e-05	0.747105	1	1	0.0183727	1	gnl|BL_ORD_ID|79515 sp|P40229|CSK2C_ARATH Casein kinase II subunit beta-2 OS=Arabidopsis thaliana OX=3702 GN=CKB2 PE=1 SV=1//1.22109e-137
MS.gene86245	MS.gene86245	chr5.1:22979635-22983883	555	0.967735	4.8605	0.170626	0.139236	0.139236	4.8605	0.170626	0.967735	-2.24727	0.00915719	-4.70055	-2.48008	0.0452264	1	0.000194528	0.073238	1	1	0.0423865	1	gnl|BL_ORD_ID|82177 sp|Q8LDD3|CUT1D_ARATH Protein CURVATURE THYLAKOID 1D, chloroplastic OS=Arabidopsis thaliana OX=3702 GN=CURT1D PE=1 SV=1//6.737e-39
MS.gene64405	MS.gene64405	chr2.4:35193353-35195921	555	1.08704	6.52083	3.9735	0.204618	0.204618	6.52083	3.9735	1.08704	-2.62392	4.0624	-4.76755	1.89873	0.0341348	0.00113809	7.31222e-05	0.134517	1	0.133554	0.0222292	1	gnl|BL_ORD_ID|19267 sp|Q54T49|APT11_DICDI Acyl-protein thioesterase 1 homolog 1 OS=Dictyostelium discoideum OX=44689 GN=DDB_G0282005 PE=2 SV=1//5.59466e-17
XLOC_235163	XLOC_235163	chr6.2:40321521-40441980	3640	1.14823	1.04072	0.280707	0.54069	0.54069	1.04072	0.280707	1.14823	-3.79425	-0.411024	-5.33144	-1.97253	0.000233889	0.766035	2.27753e-06	0.111577	0.0590645	1	0.00140244	1	-
MS.gene07181	MS.gene07181	chr1.4:70655889-70656197	309	3.43394	16.7334	1.87235	0.241897	0.241897	16.7334	1.87235	3.43394	-2.29409	2.57265	-5.69376	-0.848247	0.0616412	0.106241	0.000192067	0.518501	1	1	0.0420018	1	gnl|BL_ORD_ID|160295 sp|Q9LYC6|GRC11_ARATH Glutaredoxin-C11 OS=Arabidopsis thaliana OX=3702 GN=GRXC11 PE=3 SV=1//3.49165e-53
MS.gene023440	MS.gene023440	chr4.3:16142765-16145101	372	21.1394	22.488	17.1544	0.280203	0.280203	22.488	17.1544	21.1394	-0.117005	5.72197	-6.07373	-0.268966	0.886899	0.0109724	1.09092e-07	0.88178	1	0.474098	0.000103115	1	gnl|BL_ORD_ID|276293 sp|Q9C7F5|NTF2B_ARATH Nuclear transport factor 2B OS=Arabidopsis thaliana OX=3702 GN=NTF2B PE=1 SV=1//1.14305e-73
MS.gene004599	MS.gene004599	chr2.2:51979157-51987086	2229	4.46095	2.82385	1.09501	0.034881	0.034881	2.82385	1.09501	4.46095	0.623919	4.7732	-6.10295	-1.9893	0.47218	0.014414	0.000216643	0.0919614	1	0.54467	0.0454628	1	gnl|BL_ORD_ID|82033 sp|Q94AH6|CUL1_ARATH Cullin-1 OS=Arabidopsis thaliana OX=3702 GN=CUL1 PE=1 SV=1//0
MS.gene015769	MS.gene015769	chr4.3:2319534-2326517	1344	2.16023	1.65878	0.75049	0.01748	0.01748	1.65878	0.75049	2.16023	0.367076	5.12051	-6.2052	-1.48978	0.690776	0.0229254	1.49981e-05	0.375091	1	0.682955	0.00661562	1	gnl|BL_ORD_ID|236700 sp|Q8W3L1|MFDR_ARATH NADPH:adrenodoxin oxidoreductase, mitochondrial OS=Arabidopsis thaliana OX=3702 GN=MFDR PE=1 SV=1//0
MS.gene059716	MS.gene059716	chr4.2:10342735-10346977	1041	3.91507	8.0616	3.98408	0.084732	0.084732	8.0616	3.98408	3.91507	-1.09495	5.33316	-6.33621	0.0656522	0.424157	0.00156011	0.000161787	0.962256	1	0.160015	0.0377157	1	gnl|BL_ORD_ID|177103 sp|A2RVJ8|HIT4_ARATH Protein HEAT INTOLERANT 4 OS=Arabidopsis thaliana OX=3702 GN=HIT4 PE=1 SV=1//9.75416e-127
MS.gene058890	-	chr6.2:39663473-39667632	510	1.83152	4.86922	0.690084	0.034143	0.034143	4.86922	0.690084	1.83152	-1.3763	3.26199	-6.43155	-1.83382	0.198593	0.0602224	1.07101e-05	0.183361	1	1	0.0049677	1	-//-
MS.gene90700	MS.gene90700	chr1.4:1849788-1851148	780	14.8646	12.3246	4.08603	0.109572	0.109572	12.3246	4.08603	14.8646	0.250612	4.83913	-6.43195	-1.8565	0.783128	0.00051312	1.43357e-06	0.048966	1	0.0821543	0.000940224	1	gnl|BL_ORD_ID|288362 sp|Q43814|OTC_PEA Ornithine carbamoyltransferase, chloroplastic OS=Pisum sativum OX=3888 GN=ARGF PE=2 SV=1//2.6386e-156
MS.gene34416	MS.gene34416	chr1.2:76243213-76250957	2400	0.544787	1.34594	0.091704	0.011544	0.011544	1.34594	0.091704	0.544787	-1.35212	2.61806	-6.51871	-2.54423	0.425478	0.306248	0.000110253	0.285945	1	1	0.0295973	1	gnl|BL_ORD_ID|348532 sp|Q41382|RH7_SPIOL DEAD-box ATP-dependent RNA helicase 7 OS=Spinacia oleracea OX=3562 GN=RH7 PE=2 SV=1//0
MS.gene00065	MS.gene00065	chr2.1:59938366-59941329	1176	0.869912	1.67731	0.145033	0.011945	0.011945	1.67731	0.145033	0.869912	-0.988559	3.14787	-6.67645	-2.54322	0.461346	0.113552	0.000132422	0.112859	1	1	0.0328803	1	gnl|BL_ORD_ID|20388 sp|Q9SA77|ARAE1_ARATH UDP-arabinose 4-epimerase 1 OS=Arabidopsis thaliana OX=3702 GN=MUR4 PE=1 SV=1//0
MS.gene85446	MS.gene85446	chr7.2:26944814-26950037	1029	3.35817	7.04072	3.78367	0.043645	0.043645	7.04072	3.78367	3.35817	-1.0809	6.19918	-7.05715	0.182171	0.54329	0.0011051	1.68152e-05	0.924894	1	0.131191	0.00720524	1	gnl|BL_ORD_ID|127517 sp|Q8RX88|FACE1_ARATH CAAX prenyl protease 1 homolog OS=Arabidopsis thaliana OX=3702 GN=FACE1 PE=1 SV=1//1.48299e-167
MS.gene71917	-	chr8.3:19727821-19734509	633	1.28829	2.72661	0.233088	0.012674	0.012674	2.72661	0.233088	1.28829	-1.13164	3.671	-7.3845	-2.57979	0.413365	0.139473	0.000167783	0.155895	1	1	0.0385936	1	gnl|BL_ORD_ID|61947 sp|Q05046|CH62_CUCMA Chaperonin CPN60-2, mitochondrial OS=Cucurbita maxima OX=3661 GN=CPN60-2 PE=1 SV=1//1.0886e-26
XLOC_026951	XLOC_026951	chr1.1:55104704-55110588	5885	0.158885	0.446084	0.220465	0.0011015	0.0011015	0.446084	0.220465	0.158885	-1.5443	6.46791	-7.54741	0.467623	0.24793	0.0048844	0.000190463	0.768622	1	0.307303	0.0419243	1	-
MS.gene59981	MS.gene59981	chr6.1:71856403-71858631	675	4.28686	2.23213	2.41271	0.0066615	0.0066615	2.23213	2.41271	4.28686	0.881059	7.6595	-7.62016	-0.841524	0.408327	0.00148577	5.04903e-05	0.576539	1	0.155277	0.0169527	1	gnl|BL_ORD_ID|163299 sp|Q9ZW24|GSTU7_ARATH Glutathione S-transferase U7 OS=Arabidopsis thaliana OX=3702 GN=GSTU7 PE=2 SV=1//7.09699e-61
MS.gene27548	MS.gene27548	chr7.2:30719728-30726813	1938	4.39856	4.34887	2.39667	0.013636	0.013636	4.34887	2.39667	4.39856	-0.0175131	7.0246	-7.93837	-0.894849	0.984101	0.00934727	5.68475e-07	0.60736	1	0.437137	0.000421834	1	gnl|BL_ORD_ID|145224 sp|Q9ZVI7|GAUT7_ARATH Probable galacturonosyltransferase 7 OS=Arabidopsis thaliana OX=3702 GN=GAUT7 PE=1 SV=2//0
MS.gene04116	-	chr3.2:52507224-52514096	537	0.298656	3.14018	0.0654525	0.0076325	0.0076325	3.14018	0.0654525	0.298656	-3.37006	2.66184	-8.12364	-2.1104	0.00888424	0.180976	5.05245e-07	0.162754	0.569552	1	0.000377608	1	gnl|BL_ORD_ID|345572 sp|Q9XIB5|REM19_ARATH B3 domain-containing protein REM19 OS=Arabidopsis thaliana OX=3702 GN=REM19 PE=1 SV=1//8.50998e-09
MS.gene020886	MS.gene020886	chr5.4:76530015-76535902	2400	1.24845	6.37014	2.00795	0.0153965	0.0153965	6.37014	2.00795	1.24845	-2.39964	6.65162	-8.36883	0.689474	0.16233	0.0129767	1.10808e-07	0.773217	1	0.516201	0.000104298	1	gnl|BL_ORD_ID|180537 sp|F4JFN3|HS906_ARATH Heat shock protein 90-6, mitochondrial OS=Arabidopsis thaliana OX=3702 GN=HSP90-6 PE=2 SV=1//0
MS.gene57110	MS.gene57110	chr6.2:3835532-3837178	441	4.70098	29.0763	2.77752	0.0548695	0.0548695	29.0763	2.77752	4.70098	-2.64987	5.33761	-8.69031	-0.726445	0.0319742	0.00176105	6.73337e-08	0.559718	1	0.172195	6.98036e-05	1	gnl|BL_ORD_ID|523447 sp|P64956|Y2253_MYCBO Uncharacterized protein Mb2253c OS=Mycobacterium bovis (strain ATCC BAA-935 / AF2122/97) OX=233413 GN=BQ2027_MB2253C PE=4 SV=1//2.37936e-22
MS.gene07307	MS.gene07307	chr1.2:65353742-65357953	1529	0.348313	0.393573	0.287917	0	0	0.393573	0.287917	0.348313	-0.208277	8.89555	-9.29518	-0.227788	0.909758	0.00902124	0.000235434	0.926645	1	0.429187	0.0480173	1	gnl|BL_ORD_ID|13794 sp|Q8RWW0|ALE2_ARATH Receptor-like serine/threonine-protein kinase ALE2 OS=Arabidopsis thaliana OX=3702 GN=ALE2 PE=1 SV=1//6.54228e-97
MS.gene20020	-	chr7.2:10364553-10392283	606	0.0731615	0.412549	0.010544	0	0	0.412549	0.010544	0.0731615	-2.49935	4.41387	-9.29547	-2.42526	0.15836	0.512951	0.000228902	0.331689	1	1	0.0471279	1	gnl|BL_ORD_ID|555079 sp|Q9FFB6|ZFP34_ARATH E3 ubiquitin-protein ligase RZFP34 OS=Arabidopsis thaliana OX=3702 GN=RZPF34 PE=1 SV=1//2.98496e-62
MS.gene44101	-	chr1.3:58466931-58470018	483	0.0401285	0.692739	0.069454	0	0	0.692739	0.069454	0.0401285	-3.83389	5.69911	-9.33683	0.165769	0.0192169	0.196399	0.000217736	1	0.862903	1	0.0455782	1	gnl|BL_ORD_ID|186511 sp|Q9LSE2|ICE1_ARATH Transcription factor ICE1 OS=Arabidopsis thaliana OX=3702 GN=SCRM PE=1 SV=1//1.38768e-88
MS.gene061426	MS.gene061426	chr7.1:75457741-75471605	6138	0.006751	0.121552	#N/A	#N/A	0	0.121552	0	0.006751	-4.06232	#N/A	-9.34472	-5.3121	0.0198924	#N/A	0.000209112	0.253811	0.878143	#N/A	0.0444629	1	gnl|BL_ORD_ID|122168 sp|Q5IBC5|ESP1_ARATH Separase OS=Arabidopsis thaliana OX=3702 GN=ESP1 PE=2 SV=1//0
MS.gene013511	MS.gene013511	chr3.1:74478505-74479891	720	0.161206	1.255	0.222726	0	0	1.255	0.222726	0.161206	-2.96638	6.90175	-9.37603	0.482497	0.091014	0.0172501	0.000188935	0.804311	1	0.594747	0.0416694	1	gnl|BL_ORD_ID|339053 sp|Q9I8B3|RB24B_XENLA RNA-binding protein 24-B OS=Xenopus laevis OX=8355 GN=rbm24-b PE=2 SV=1//9.12432e-31
MS.gene03732	MS.gene03732	chr4.3:44576329-44578524	411	0.0374545	0.813411	0.310646	0	0	0.813411	0.310646	0.0374545	-4.26748	8.08311	-9.42222	2.92308	0.0138166	0.0196801	0.000174056	0.211308	0.726995	0.633	0.0394694	1	gnl|BL_ORD_ID|386080 sp|Q5ZM20|RMI2_CHICK RecQ-mediated genome instability protein 2 OS=Gallus gallus OX=9031 GN=RMI2 PE=2 SV=1//3.42459e-06
MS.gene66826	MS.gene66826	chr3.4:98972164-98973913	732	0.234042	1.06367	0.311611	0	0	1.06367	0.311611	0.234042	-2.188	7.73992	-9.45086	0.445007	0.219115	0.0271654	0.000165621	0.85833	1	0.741584	0.0383315	1	gnl|BL_ORD_ID|132886 sp|Q9LM71|FKB18_ARATH Peptidyl-prolyl cis-trans isomerase FKBP18, chloroplastic OS=Arabidopsis thaliana OX=3702 GN=FKBP18 PE=1 SV=2//2.53179e-87
XLOC_323291	XLOC_323291	chr8.4:12784378-12787207	2026	0.558684	0.668114	0.337085	0	0	0.668114	0.337085	0.558684	-0.274315	8.47514	-9.4573	-0.719348	0.880822	0.013477	0.000239234	0.757115	1	0.523849	0.0487483	1	-
MS.gene33012	MS.gene33012	chr1.1:6050392-6053216	852	0.492525	0.643163	0.557365	0	0	0.643163	0.557365	0.492525	-0.4238	9.18895	-9.47517	0.127995	0.826898	0.00676266	0.000229933	0.962432	1	0.367708	0.0472814	1	-//-
XLOC_052729	XLOC_052729	chr1.4:46439406-46441609	1623	0.385864	0.860758	0.069248	0	0	0.860758	0.069248	0.385864	-1.17613	5.95775	-9.48768	-2.39096	0.504937	0.15905	0.00014265	0.308375	1	1	0.0343951	1	-
MS.gene010539	MS.gene010539	chr5.1:12044384-12048774	1218	0.294974	0.428534	0.101714	0	0	0.428534	0.101714	0.294974	-0.584218	7.46653	-9.48811	-1.47122	0.741484	0.0350967	0.000140105	0.531204	1	0.83433	0.034	1	gnl|BL_ORD_ID|475577 sp|Q6DHN0|TMM53_DANRE Transmembrane protein 53 OS=Danio rerio OX=7955 GN=tmem53 PE=2 SV=1//3.49533e-17
MS.gene28157	MS.gene28157	chr4.4:9691627-9693647	630	0.5736	0.950878	0.767752	0	0	0.950878	0.767752	0.5736	-0.723103	9.24717	-9.49426	0.427367	0.69857	0.00172744	0.000158932	0.842695	1	0.170372	0.0371657	1	gnl|BL_ORD_ID|337737 sp|Q43463|RAB7_SOYBN Ras-related protein Rab7 OS=Glycine max OX=3847 PE=2 SV=1//4.64876e-120
MS.gene98989	MS.gene98989	chr1.2:41540584-41543451	930	0.86019	0.689588	0.526608	0	0	0.689588	0.526608	0.86019	0.307192	9.13314	-9.53682	-0.722894	0.799912	0.00707012	0.000135717	0.681203	1	0.376022	0.0334769	1	gnl|BL_ORD_ID|435538 sp|Q9M2P4|SINA2_ARATH E3 ubiquitin-protein ligase SINAT2 OS=Arabidopsis thaliana OX=3702 GN=SINAT2 PE=1 SV=1//2.11767e-165
MS.gene91970	MS.gene91970	chr5.2:82495489-82505358	603	0.27792	0.198808	0.0549975	0	0	0.198808	0.0549975	0.27792	0.431055	7.73992	-9.55184	-2.2766	0.815018	0.0271671	0.000121697	0.33542	1	0.741584	0.031442	1	-//-
MS.gene30909	MS.gene30909	chr1.2:50239374-50245042	1560	0.0188955	0.358972	#N/A	#N/A	0	0.358972	0	0.0188955	-4.17671	#N/A	-9.57089	-5.43314	0.0175234	#N/A	0.00013643	0.227656	0.824995	#N/A	0.0335654	1	gnl|BL_ORD_ID|193175 sp|F4KF65|IMPA9_ARATH Importin subunit alpha-9 OS=Arabidopsis thaliana OX=3702 GN=IMPA9 PE=3 SV=1//0
MS.gene038082	MS.gene038082	chr1.2:52854514-52858116	624	0.269124	0.553396	0.29621	0	0	0.553396	0.29621	0.269124	-1.06001	8.71135	-9.57221	0.159331	0.560555	0.00121349	0.000112297	0.938613	1	0.138727	0.0298608	1	gnl|BL_ORD_ID|507891 sp|Q941D5|VPS2C_ARATH Vacuolar protein sorting-associated protein 2 homolog 3 OS=Arabidopsis thaliana OX=3702 GN=VPS2.3 PE=2 SV=1//8.32316e-102
MS.gene049041	MS.gene049041	chr4.2:3029915-3031736	432	0.214531	1.09061	0.472262	0	0	1.09061	0.472262	0.214531	-2.37314	8.41321	-9.57964	1.18138	0.17911	0.0145634	0.000125867	0.611554	1	0.548525	0.0319393	1	gnl|BL_ORD_ID|18005 sp|O82201|AP4S_ARATH AP-4 complex subunit sigma OS=Arabidopsis thaliana OX=3702 GN=At2g19790 PE=1 SV=1//1.93631e-93
MS.gene023869	MS.gene023869	chr7.1:26253971-26260425	1041	0.192161	0.324001	0.11181	0	0	0.324001	0.11181	0.192161	-0.738685	8.15668	-9.59697	-0.744931	0.58239	0.00338217	0.000215038	0.602183	1	0.251447	0.0452525	1	gnl|BL_ORD_ID|12371 sp|O80834|AHL9_ARATH AT-hook motif nuclear-localized protein 9 OS=Arabidopsis thaliana OX=3702 GN=AHL9 PE=2 SV=1//1.02768e-61
MS.gene65855	MS.gene65855	chr3.2:9746789-9748879	1761	0.036121	1.00432	0.014575	0	0	1.00432	0.014575	0.036121	-4.51365	3.78824	-9.60385	-1.30296	0.00543273	0.658604	0.000177867	0.578525	0.43902	1	0.040053	1	gnl|BL_ORD_ID|392463 sp|Q39214|RPM1_ARATH Disease resistance protein RPM1 OS=Arabidopsis thaliana OX=3702 GN=RPM1 PE=1 SV=1//2.78631e-77
MS.gene59310	MS.gene59310	chr1.3:16134082-16137511	957	0.422048	0.590731	0.249605	0	0	0.590731	0.249605	0.422048	-0.540761	8.32665	-9.60629	-0.740619	0.76492	0.0156628	0.00011424	0.75065	1	0.566805	0.0302446	1	gnl|BL_ORD_ID|434422 sp|O70593|SGTA_RAT Small glutamine-rich tetratricopeptide repeat-containing protein alpha OS=Rattus norvegicus OX=10116 GN=Sgta PE=1 SV=1//7.46725e-28
MS.gene021432	MS.gene021432	8624:10507-14021	2022	0.346087	0.573283	0.0673235	0	0	0.573283	0.0673235	0.346087	-0.773175	6.57515	-9.61347	-2.28766	0.542095	0.0260602	0.000137669	0.0920233	1	0.725713	0.0337364	1	gnl|BL_ORD_ID|552882 sp|Q2EF88|YSL3_ARATH Metal-nicotianamine transporter YSL3 OS=Arabidopsis thaliana OX=3702 GN=YSL3 PE=2 SV=1//0
MS.gene008623	MS.gene008623	chr3.4:60855849-60860618	960	0.314746	0.433981	0.265381	0	0	0.433981	0.265381	0.314746	-0.494696	8.88382	-9.62551	-0.253602	0.707983	0.00169288	9.89927e-05	0.873108	1	0.168633	0.0274898	1	gnl|BL_ORD_ID|56459 sp|Q9S9N9|CCR1_ARATH Cinnamoyl-CoA reductase 1 OS=Arabidopsis thaliana OX=3702 GN=CCR1 PE=1 SV=1//8.26398e-70
MS.gene016428	MS.gene016428	chr8.2:58287585-58288991	876	1.38595	1.46799	0.198355	0	0	1.46799	0.198355	1.38595	-0.127556	6.7981	-9.63933	-2.75001	0.925628	0.0687088	0.000111746	0.12886	1	1	0.0297612	1	gnl|BL_ORD_ID|230004 sp|O64518|MCA5_ARATH Metacaspase-5 OS=Arabidopsis thaliana OX=3702 GN=AMC5 PE=1 SV=1//3.8164e-19
MS.gene062768	MS.gene062768	chr1.4:3343261-3349006	3603	0.0114055	0.356806	0.049852	0	0	0.356806	0.049852	0.0114055	-4.87097	6.76841	-9.6535	1.94323	0.0116204	0.0681841	0.000244822	0.454527	0.659739	1	0.0496229	1	gnl|BL_ORD_ID|442904 sp|Q2TBM9|SRAC1_BOVIN Protein SERAC1 OS=Bos taurus OX=9913 GN=SERAC1 PE=2 SV=1//5.30157e-40
MS.gene32322	MS.gene32322	chr1.4:14246676-14255002	1554	0.019664	0.254382	#N/A	#N/A	0	0.254382	0	0.019664	-3.74631	#N/A	-9.67773	-6.02768	0.0398045	#N/A	0.000100624	0.139613	1	#N/A	0.0278089	1	gnl|BL_ORD_ID|305418 sp|Q9SQH6|PIN6_ARATH Auxin efflux carrier component 6 OS=Arabidopsis thaliana OX=3702 GN=PIN6 PE=2 SV=2//0
MS.gene63871	MS.gene63871	chr5.1:75747846-75751241	1086	0.335103	0.645966	0.264394	0	0	0.645966	0.264394	0.335103	-0.956464	8.42459	-9.70805	-0.351851	0.44651	0.000901632	7.89169e-05	0.782572	1	0.116698	0.0233593	1	-//-
MS.gene060740	MS.gene060740	chr4.4:71497849-71507785	1419	0.074549	0.218449	0.132394	0	0	0.218449	0.132394	0.074549	-1.58279	8.97728	-9.71538	0.820517	0.23229	0.000266654	9.79736e-05	0.521661	1	0.05402	0.0273451	1	gnl|BL_ORD_ID|267724 sp|O35130|NEP1_MOUSE Ribosomal RNA small subunit methyltransferase NEP1 OS=Mus musculus OX=10090 GN=Emg1 PE=1 SV=1//7.03345e-50
MS.gene30840	MS.gene30840	chr6.4:37746642-37747823	801	2.60915	1.95747	1.43078	0	0	1.95747	1.43078	2.60915	0.404121	9.29448	-9.73659	-0.860046	0.829349	0.00604914	0.000173788	0.712156	1	0.346413	0.0394505	1	gnl|BL_ORD_ID|106411 sp|Q9SYS6|DRE1C_ARATH Dehydration-responsive element-binding protein 1C OS=Arabidopsis thaliana OX=3702 GN=DREB1C PE=2 SV=2//2.51908e-48
MS.gene38822	MS.gene38822	chr7.1:16680072-16684500	1868	0.544195	0.495022	0.284403	0	0	0.495022	0.284403	0.544195	0.0755471	8.95637	-9.74654	-0.899221	0.954107	0.00846836	0.000139657	0.608833	1	0.414545	0.0339719	1	gnl|BL_ORD_ID|304875 sp|Q9QYT7|PIGQ_MOUSE Phosphatidylinositol N-acetylglucosaminyltransferase subunit Q OS=Mus musculus OX=10090 GN=Pigq PE=1 SV=3//2.09137e-21
MS.gene012288	MS.gene012288	chr8.4:8513535-8519828	2430	0.183306	0.365163	0.128596	0	0	0.365163	0.128596	0.183306	-0.996203	8.29128	-9.74958	-0.494542	0.429592	0.00120879	8.93946e-05	0.699513	1	0.138468	0.0254882	1	gnl|BL_ORD_ID|42829 sp|P48980|BGAL_SOLLC Beta-galactosidase OS=Solanum lycopersicum OX=4081 PE=1 SV=1//0
MS.gene066366	MS.gene066366	chr5.4:32455163-32461435	2122	0.339002	0.51466	0.316626	0	0	0.51466	0.316626	0.339002	-1.51645	8.08311	-9.75303	-0.187085	0.278671	0.0196804	0.000224053	0.920047	1	0.633	0.0464972	1	gnl|BL_ORD_ID|79229 sp|F4I248|CSCLB_ARATH CSC1-like protein At1g69450 OS=Arabidopsis thaliana OX=3702 GN=At1g69450 PE=2 SV=1//0
MS.gene99146	MS.gene99146	chr8.2:82698491-82701693	1215	0.619514	0.717781	0.15265	0	0	0.717781	0.15265	0.619514	-0.231611	7.5313	-9.78694	-2.03646	0.873021	0.03249	6.91189e-05	0.290206	1	0.804805	0.0214173	1	gnl|BL_ORD_ID|306783 sp|O48723|PLP2_ARATH Patatin-like protein 2 OS=Arabidopsis thaliana OX=3702 GN=PLP2 PE=1 SV=1//8.48315e-85
MS.gene93852	MS.gene93852	chr1.2:78034608-78035755	600	0.448699	2.06052	0.758777	0	0	2.06052	0.758777	0.448699	-2.20555	8.43046	-9.79719	0.805128	0.211791	0.0142951	6.98008e-05	0.732032	1	0.541972	0.0215396	1	gnl|BL_ORD_ID|494515 sp|Q84MC0|UGPI4_ARATH Uncharacterized GPI-anchored protein At3g06035 OS=Arabidopsis thaliana OX=3702 GN=At3g06035 PE=2 SV=1//6.23213e-70
MS.gene95827	-	chr6.2:44129830-44135778	717	0.0669515	0.804018	0.343192	0	0	0.804018	0.343192	0.0669515	-3.48042	8.56985	-9.79767	2.2278	0.0221236	0.00465412	6.35105e-05	0.229981	0.925345	0.301044	0.0200826	1	gnl|BL_ORD_ID|289548 sp|Q8GXT7|P4H12_ARATH Probable prolyl 4-hydroxylase 12 OS=Arabidopsis thaliana OX=3702 GN=P4H12 PE=2 SV=1//4.4085e-64
MS.gene67919	MS.gene67919	chr7.2:63673681-63676008	918	0.0914915	1.02454	#N/A	#N/A	0	1.02454	0	0.0914915	-3.47874	#N/A	-9.83262	-6.40745	0.0440099	#N/A	5.77491e-05	0.0818859	1	#N/A	0.0186388	1	gnl|BL_ORD_ID|130388 sp|Q9LX47|FDL46_ARATH Putative F-box/FBD/LRR-repeat protein At3g59240 OS=Arabidopsis thaliana OX=3702 GN=At3g59240 PE=4 SV=1//1.36402e-08
MS.gene036362	MS.gene036362	chr2.4:39521949-39527226	2199	0.379622	0.455501	0.0324845	0	0	0.455501	0.0324845	0.379622	-0.272126	6.14883	-9.83822	-3.44374	0.861697	0.0522209	5.63301e-05	0.0502498	1	0.970431	0.0183653	1	gnl|BL_ORD_ID|158539 sp|Q9LVN0|GPDL7_ARATH Glycerophosphodiester phosphodiesterase GDPDL7 OS=Arabidopsis thaliana OX=3702 GN=GDPDL7 PE=2 SV=1//0
MS.gene014881	MS.gene014881	chr3.3:87298494-87307248	1044	0.033987	0.288525	0.0872705	0	0	0.288525	0.0872705	0.033987	-3.04279	8.19792	-9.87552	1.34271	0.0856267	0.00157875	8.39107e-05	0.451147	1	0.161347	0.0243548	1	gnl|BL_ORD_ID|521336 sp|Q0V7T5|Y1864_ARATH Probable receptor-like protein kinase At1g80640 OS=Arabidopsis thaliana OX=3702 GN=At1g80640 PE=2 SV=1//8.48249e-92
MS.gene57565	MS.gene57565	chr8.4:8773303-8777804	1783	0.645219	0.548056	0.197291	0	0	0.548056	0.197291	0.645219	0.192753	8.44751	-9.88876	-1.67126	0.873745	0.0140417	5.36265e-05	0.335378	1	0.536679	0.0176712	1	gnl|BL_ORD_ID|59765 sp|A7XN92|CFM3_MAIZE CRM-domain containing factor CFM3, chloroplastic/mitochondrial OS=Zea mays OX=4577 GN=CFM3 PE=1 SV=1//3.86932e-180
MS.gene36372	MS.gene36372	chr2.2:2549984-2553595	1398	0.297797	0.708592	0.112957	0	0	0.708592	0.112957	0.297797	-1.22844	7.32615	-9.8917	-1.38847	0.349553	0.0410562	9.58043e-05	0.440891	1	0.883616	0.0268771	1	gnl|BL_ORD_ID|300820 sp|Q9C5J7|PFKA7_ARATH ATP-dependent 6-phosphofructokinase 7 OS=Arabidopsis thaliana OX=3702 GN=PFK7 PE=1 SV=1//0
MS.gene52587	MS.gene52587	chr7.4:25983070-25986769	1299	0.0552985	0.719715	0.083965	0	0	0.719715	0.083965	0.0552985	-3.68406	6.88897	-9.97785	0.604187	0.0318173	0.06085	3.88726e-05	0.79638	1	1	0.0138367	1	-//-
MS.gene59060	MS.gene59060	chr8.4:13962910-13966005	1149	0.0304195	0.835542	0.379804	0	0	0.835542	0.379804	0.0304195	-4.70989	8.85778	-9.9958	3.56644	0.0121724	0.00942055	0.000169632	0.132706	0.677447	0.439484	0.0388216	1	gnl|BL_ORD_ID|279012 sp|Q94A82|NUD19_ARATH Nudix hydrolase 19, chloroplastic OS=Arabidopsis thaliana OX=3702 GN=NUDT19 PE=1 SV=1//0
MS.gene81973	MS.gene81973	chr3.2:76472772-76476308	768	0.901879	0.786926	0.219678	0	0	0.786926	0.219678	0.901879	0.173757	8.26721	-10.0481	-1.99823	0.880896	0.0166351	3.15774e-05	0.249796	1	0.583795	0.0117416	1	-//-
MS.gene65152	MS.gene65152	chr7.1:42004737-42007479	507	0.692885	1.03019	0.195483	0	0	1.03019	0.195483	0.692885	-0.579813	7.6497	-10.0574	-1.8403	0.627783	0.029852	3.19859e-05	0.291922	1	0.774782	0.0118543	1	-//-
MS.gene50672	MS.gene50672	chr4.3:33484424-33487990	1062	0.503928	0.812515	0.0815825	0	0	0.812515	0.0815825	0.503928	-0.684227	6.80973	-10.0705	-2.587	0.627368	0.0648202	5.89995e-05	0.167922	1	1	0.0189608	1	-//-
MS.gene39678	MS.gene39678	chr8.3:79831603-79836038	1026	0.289892	0.64062	0.129225	0	0	0.64062	0.129225	0.289892	-1.21394	7.82064	-10.1266	-1.121	0.376237	0.0251587	0.000101291	0.535014	1	0.714209	0.0279384	1	gnl|BL_ORD_ID|6397 sp|Q9LTH7|ACH12_ARATH 1-aminocyclopropane-1-carboxylate oxidase homolog 12 OS=Arabidopsis thaliana OX=3702 GN=At5g59540 PE=2 SV=1//1.50645e-111
XLOC_261477	XLOC_261477	chr7.1:79889346-79892744	1553	0.381038	0.900435	0.137357	0	0	0.900435	0.137357	0.381038	-1.279	7.45529	-10.2016	-1.46914	0.307207	0.0353588	2.25942e-05	0.411965	1	0.835141	0.00901202	1	-
MS.gene20126	MS.gene20126	chr5.4:5028701-5031346	1452	1.86427	1.21401	1.07068	0	0	1.21401	1.07068	1.86427	0.619389	10.0387	-10.2211	-0.819474	0.590815	0.00289021	3.52141e-05	0.63407	1	0.229024	0.01286	1	gnl|BL_ORD_ID|48811 sp|Q7XU38|C87A3_ORYSJ Cytochrome P450 87A3 OS=Oryza sativa subsp. japonica OX=39947 GN=CYP87A3 PE=2 SV=3//0
MS.gene51235	-	chr1.2:74319037-74324101	1116	0.0980885	0.726386	0.0085485	0	0	0.726386	0.0085485	0.0980885	-3.16742	3.17919	-10.2466	-3.98012	0.0320538	0.778881	7.6987e-05	0.0479694	1	1	0.0229391	1	-//-
MS.gene063304	MS.gene063304	chr6.1:78128449-78134305	303	0.263844	0.539724	0.118596	0	0	0.539724	0.118596	0.263844	-1.10941	8.08971	-10.2932	-1.11066	0.44767	0.00184686	0.000192309	0.382335	1	0.176414	0.0420018	1	gnl|BL_ORD_ID|86616 sp|O22704|CYP5F_ARATH Cytochrome B5-like protein OS=Arabidopsis thaliana OX=3702 GN=CB5LP PE=2 SV=1//4.76752e-44
MS.gene052897	MS.gene052897	chr3.1:71783948-71788997	1488	0.0743275	0.660029	0.0457475	0	0	0.660029	0.0457475	0.0743275	-3.1643	6.44039	-10.3026	-0.695901	0.0648439	0.0951584	1.51387e-05	0.788853	1	1	0.00665156	1	gnl|BL_ORD_ID|63739 sp|P51090|CHSY_VITVI Chalcone synthase OS=Vitis vinifera OX=29760 GN=CHS PE=2 SV=1//4.31462e-110
MS.gene98485	MS.gene98485	chr5.4:19215778-19218251	873	0.393207	1.36539	0.364275	0	0	1.36539	0.364275	0.393207	-1.80313	8.44575	-10.3058	-0.0848677	0.172838	0.0008698	1.84131e-05	0.951683	1	0.11381	0.00768501	1	-//-
MS.gene03638	MS.gene03638	chr3.4:34384061-34401245	3638	0.151788	0.209894	0.0958345	0	0	0.209894	0.0958345	0.151788	-0.430812	9.25767	-10.3601	-0.697669	0.791259	0.00627646	0.000131581	0.723214	1	0.353596	0.0328017	1	gnl|BL_ORD_ID|92822 sp|Q9LXW7|DCL3_ARATH Endoribonuclease Dicer homolog 3 OS=Arabidopsis thaliana OX=3702 GN=DCL3 PE=1 SV=2//0
MS.gene028257	-	chr4.2:16871090-16874377	1038	0.0171015	1.1057	0.212445	0	0	1.1057	0.212445	0.0171015	-5.68493	8.01613	-10.3703	3.33832	0.000820397	0.0209921	1.26607e-05	0.168561	0.138526	0.652395	0.00575384	1	-//-
MS.gene025979	MS.gene025979	chr7.1:1641004-1642493	1248	1.15216	2.45295	2.16086	0	0	2.45295	2.16086	1.15216	-1.09398	10.2219	-10.4277	0.870132	0.541783	0.00240455	1.05799e-05	0.717419	1	0.20627	0.00492763	1	gnl|BL_ORD_ID|119905 sp|Q8VXY7|ENT1_ARATH Equilibrative nucleotide transporter 1 OS=Arabidopsis thaliana OX=3702 GN=ENT1 PE=1 SV=1//2.42989e-174
MS.gene029217	MS.gene029217	chr1.2:84192189-84196886	1665	0.380046	0.761336	0.332518	0	0	0.761336	0.332518	0.380046	-1.05979	9.25641	-10.4292	-0.143497	0.545138	0.00636561	1.2788e-05	0.953462	1	0.355616	0.00578829	1	gnl|BL_ORD_ID|311759 sp|Q9LYT2|PP287_ARATH Pentatricopeptide repeat-containing protein At3g59040 OS=Arabidopsis thaliana OX=3702 GN=At3g59040 PE=2 SV=2//0
XLOC_181921	XLOC_181921	chr4.4:60844527-60849702	2564	0.431822	0.724328	0.0721	0	0	0.724328	0.0721	0.431822	-0.767981	7.13625	-10.4494	-2.55527	0.663199	0.0477088	1.26974e-05	0.275799	1	0.937198	0.0057589	1	-
MS.gene22871	MS.gene22871	chr7.4:1909828-1911318	1248	2.42932	2.52123	2.19643	0	0	2.52123	2.19643	2.42932	-0.0717021	10.2446	-10.4684	-0.16361	0.952436	0.00234805	9.3026e-06	0.927236	1	0.203373	0.00451016	1	gnl|BL_ORD_ID|119905 sp|Q8VXY7|ENT1_ARATH Equilibrative nucleotide transporter 1 OS=Arabidopsis thaliana OX=3702 GN=ENT1 PE=1 SV=1//2.42989e-174
MS.gene011845	MS.gene011845	chr8.2:26058677-26062718	1674	0.6	0.909513	0.230667	0	0	0.909513	0.230667	0.6	-0.651286	8.49766	-10.4814	-1.35638	0.592294	0.000830165	1.6702e-05	0.264717	1	0.110776	0.0071841	1	gnl|BL_ORD_ID|347611 sp|Q65XV7|RFA1C_ORYSJ Replication protein A 70 kDa DNA-binding subunit C OS=Oryza sativa subsp. japonica OX=39947 GN=RPA1C PE=1 SV=1//8.36377e-19
MS.gene09722	MS.gene09722	chr5.3:6323108-6325832	696	0.694985	1.4397	1.50658	0	0	1.4397	1.50658	0.694985	-1.02497	10.5699	-10.4957	1.07501	0.5813	0.00166396	2.72663e-05	0.657355	1	0.166817	0.0104525	1	gnl|BL_ORD_ID|353954 sp|P82413|RK19_SPIOL 50S ribosomal protein L19, chloroplastic OS=Spinacia oleracea OX=3562 GN=RPL19 PE=1 SV=2//4.74536e-76
MS.gene35396	MS.gene35396	chr2.1:15826410-15829556	936	0.241091	1.24404	0.117837	0	0	1.24404	0.117837	0.241091	-2.39961	7.13625	-10.5403	-1.0062	0.162676	0.0477194	7.12931e-06	0.666818	1	0.937198	0.00367138	1	gnl|BL_ORD_ID|556957 sp|Q9SGD1|ZWIP3_ARATH Zinc finger protein WIP3 OS=Arabidopsis thaliana OX=3702 GN=WIP3 PE=2 SV=1//8.28661e-109
MS.gene016198	MS.gene016198	chr1.2:6449887-6453546	840	1.49455	1.06835	0.278211	0	0	1.06835	0.278211	1.49455	0.452894	8.56224	-10.5404	-2.43942	0.670344	0.0125266	7.19207e-06	0.148037	1	0.506557	0.0036939	1	gnl|BL_ORD_ID|541437 sp|Q07379|YD057_YEAST Putative uncharacterized protein YDL057W OS=Saccharomyces cerevisiae (strain ATCC 204508 / S288c) OX=559292 GN=YDL057W PE=1 SV=1//5.21987e-11
MS.gene04798	MS.gene04798	chr4.4:2519270-2520135	519	2.64457	4.91628	2.56555	0	0	4.91628	2.56555	2.64457	-0.897785	9.76484	-10.6434	-0.0291123	0.614395	0.00382837	5.41778e-06	0.993402	1	0.26939	0.00293683	1	-//-
MS.gene59682	MS.gene59682	chr5.4:43403549-43405381	987	0.067075	2.31183	0.0339905	0	0	2.31183	0.0339905	0.067075	-5.02327	4.72928	-10.647	-0.942958	0.00387204	0.441397	4.92846e-06	0.718988	0.359327	1	0.00273081	1	-//-
MS.gene90765	MS.gene90765	chr2.2:28203825-28213328	1494	0.329263	0.46456	0.102419	0	0	0.46456	0.102419	0.329263	-0.506399	8.50056	-10.6973	-1.70168	0.648475	0.0132862	4.47792e-06	0.321849	1	0.520933	0.00251838	1	gnl|BL_ORD_ID|321850 sp|Q40519|PSBR_TOBAC Photosystem II 10 kDa polypeptide, chloroplastic OS=Nicotiana tabacum OX=4097 GN=PSBR PE=2 SV=1//3.37631e-52
XLOC_237111	XLOC_237111	chr6.2:84905297-84907709	2324	1.80126	1.81523	0.801091	0	0	1.81523	0.801091	1.80126	-0.060267	9.48486	-10.7237	-1.18334	0.959816	0.00497919	5.11897e-06	0.491123	1	0.310285	0.00281935	1	-
MS.gene26963	MS.gene26963	chr1.3:2787717-2797189	1827	0.0673435	0.487227	0.0571745	0	0	0.487227	0.0571745	0.0673435	-2.86005	7.67225	-10.7707	-0.25786	0.0336018	0.0290534	3.19902e-06	0.903561	1	0.766007	0.00187898	1	gnl|BL_ORD_ID|2362 sp|Q54XC1|5NTC_DICDI Cytosolic purine 5&apos;-nucleotidase OS=Dictyostelium discoideum OX=44689 GN=nt5c2 PE=3 SV=1//2.42478e-71
MS.gene89461	MS.gene89461	chr2.4:30118837-30164649	1146	0.081982	0.16397	0.010601	0	0	0.16397	0.010601	0.081982	-1.13814	6.80973	-10.7764	-2.83496	0.511979	0.0648393	3.18604e-06	0.230095	1	1	0.00187626	1	gnl|BL_ORD_ID|348179 sp|Q9SAL0|RGLG4_ARATH E3 ubiquitin-protein ligase RGLG4 OS=Arabidopsis thaliana OX=3702 GN=RGLG4 PE=1 SV=1//1.17814e-175
MS.gene049847	MS.gene049847	chr4.4:43844716-43847974	1146	0.254539	1.57047	0.074605	0	0	1.57047	0.074605	0.254539	-2.58519	6.54196	-10.8652	-1.75922	0.0851068	0.0851603	5.48529e-05	0.322793	1	1	0.0179617	1	gnl|BL_ORD_ID|26474 sp|Q9SSE7|AROD2_ARATH Arogenate dehydratase/prephenate dehydratase 2, chloroplastic OS=Arabidopsis thaliana OX=3702 GN=ADT2 PE=1 SV=1//1.0248e-164
MS.gene047328	MS.gene047328	chr2.3:70663665-70670719	2349	0.096924	0.716245	0.165573	0	0	0.716245	0.165573	0.096924	-2.92764	8.84497	-10.9315	0.814723	0.088139	0.00956391	2.57283e-06	0.731062	1	0.443916	0.00155587	1	gnl|BL_ORD_ID|224705 sp|O48847|LUH_ARATH Transcriptional corepressor LEUNIG_HOMOLOG OS=Arabidopsis thaliana OX=3702 GN=LUH PE=1 SV=1//5.86109e-96
MS.gene063040	MS.gene063040	chr5.3:49260455-49264045	1341	1.50755	1.63997	1.50083	0	0	1.63997	1.50083	1.50755	-0.13019	10.9619	-11.1039	-0.0255333	0.904291	0.00110345	1.28357e-06	0.989607	1	0.131077	0.000855735	1	gnl|BL_ORD_ID|47745 sp|Q9SGZ5|BXL7_ARATH Probable beta-D-xylosidase 7 OS=Arabidopsis thaliana OX=3702 GN=BXL7 PE=2 SV=2//0
MS.gene052684	MS.gene052684	chr8.1:79909010-79915841	4113	0.578259	0.878453	0.1238	0	0	0.878453	0.1238	0.578259	-0.669731	8.35856	-11.1911	-2.17814	0.608782	0.00103927	1.97174e-06	0.109537	1	0.126828	0.001239	1	gnl|BL_ORD_ID|107077 sp|Q9SZ66|DSC1_ARATH Disease resistance-like protein DSC1 OS=Arabidopsis thaliana OX=3702 GN=DSC1 PE=1 SV=1//4.8366e-82
MS.gene78729	MS.gene78729	chr5.4:42288506-42291614	729	2.13296	2.00724	1.16614	0	0	2.00724	1.16614	2.13296	0.0617351	10.4713	-11.2045	-0.836427	0.951555	0.00185866	6.46381e-07	0.626029	1	0.176962	0.000469064	1	gnl|BL_ORD_ID|6389 sp|Q9C540|ACFR4_ARATH Probable transmembrane ascorbate ferrireductase 4 OS=Arabidopsis thaliana OX=3702 GN=CYB561D PE=2 SV=1//4.21609e-95
MS.gene065599	MS.gene065599	chr1.4:38956956-38966341	1158	0.398448	0.704452	0.245383	0	0	0.704452	0.245383	0.398448	-0.860022	9.81825	-11.3069	-0.663562	0.434454	0.00363551	4.84946e-07	0.709028	1	0.261469	0.000364861	1	gnl|BL_ORD_ID|461985 sp|Q8S9J2|SYYC1_ARATH Tyrosine--tRNA ligase 1, cytoplasmic OS=Arabidopsis thaliana OX=3702 GN=At2g33840 PE=2 SV=1//0
MS.gene50673	-	chr4.3:33487721-33491189	279	0.035943	1.99815	0.105462	0	0	1.99815	0.105462	0.035943	-5.74871	4.69846	-11.3671	-0.915959	0.00284191	0.291006	1.36804e-05	0.69787	0.301897	1	0.00610622	1	gnl|BL_ORD_ID|21142 sp|P32295|ARG7_VIGRR Indole-3-acetic acid-induced protein ARG7 OS=Vigna radiata var. radiata OX=3916 GN=ARG7 PE=2 SV=1//2.90488e-44
MS.gene89102	MS.gene89102	chr2.4:2733727-2738909	1950	0.0523195	1.30492	0.313757	0	0	1.30492	0.313757	0.0523195	-4.64376	9.32259	-11.3806	2.54063	0.0143375	0.00593513	6.52029e-06	0.303304	0.741694	0.342881	0.0034432	1	gnl|BL_ORD_ID|448961 sp|Q9LW86|SUT34_ARATH Probable sulfate transporter 3.4 OS=Arabidopsis thaliana OX=3702 GN=SULTR3;4 PE=2 SV=1//0
MS.gene010034	MS.gene010034	chr5.3:53699553-53701032	768	2.20149	4.84229	1.60432	0	0	4.84229	1.60432	2.20149	-1.15084	9.86342	-11.4109	-0.441426	0.509524	0.00347724	2.74694e-07	0.855923	1	0.254968	0.000226356	1	gnl|BL_ORD_ID|186047 sp|Q38826|IAA8_ARATH Auxin-responsive protein IAA8 OS=Arabidopsis thaliana OX=3702 GN=IAA8 PE=1 SV=1//2.10402e-83
MS.gene011651	MS.gene011651	chr8.1:24283748-24287762	2142	1.01416	2.01691	1.01099	0	0	2.01691	1.01099	1.01416	-1.03758	10.5548	-11.5893	-0.00122944	0.544501	0.00169764	1.26338e-07	1	1	0.168922	0.000117442	1	gnl|BL_ORD_ID|240116 sp|Q8RX22|MIP1_ARATH MND1-interacting protein 1 OS=Arabidopsis thaliana OX=3702 GN=MIP1 PE=1 SV=1//1.24874e-167
MS.gene26913	MS.gene26913	chr1.3:3367808-3370556	2016	0.223778	2.89275	0.285815	0	0	2.89275	0.285815	0.223778	-3.71936	8.19266	-11.6065	0.294284	0.0409753	0.0176148	1.15393e-06	0.913194	1	0.601412	0.000774888	1	gnl|BL_ORD_ID|78345 sp|Q9T0J1|CRK26_ARATH Cysteine-rich receptor-like protein kinase 26 OS=Arabidopsis thaliana OX=3702 GN=CRK26 PE=2 SV=1//0
MS.gene055368	MS.gene055368	chr8.1:87074912-87078604	408	2.16392	2.37818	1.04126	0	0	2.37818	1.04126	2.16392	-0.119973	10.5562	-11.644	-1.01815	0.9226	0.00170689	3.63828e-06	0.551234	1	0.169363	0.00210945	1	gnl|BL_ORD_ID|20533 sp|Q9M117|ARC5A_ARATH Actin-related protein 2/3 complex subunit 5A OS=Arabidopsis thaliana OX=3702 GN=ARPC5A PE=1 SV=2//1.14767e-74
MS.gene51905	MS.gene51905	chr7.4:22205703-22212179	1293	1.52207	1.36445	0.400719	0	0	1.36445	0.400719	1.52207	0.168695	9.991	-11.6486	-1.87555	0.904695	0.00305997	1.28637e-05	0.294864	1	0.237276	0.00581088	1	gnl|BL_ORD_ID|276428 sp|P52914|NTPA_PEA Nucleoside-triphosphatase OS=Pisum sativum OX=3888 PE=2 SV=1//0
MS.gene27102	MS.gene27102	chr1.1:240179-246026	1554	0.421351	2.27217	0.701619	0	0	2.27217	0.701619	0.421351	-2.15121	10.5579	-11.7928	0.901844	0.212396	0.00169148	4.89352e-08	0.709227	1	0.168567	5.3181e-05	1	gnl|BL_ORD_ID|446910 sp|F4JTP5|STY46_ARATH Serine/threonine-protein kinase STY46 OS=Arabidopsis thaliana OX=3702 GN=STY46 PE=1 SV=1//2.23593e-164
MS.gene051272	MS.gene051272	chr7.3:50933743-50936098	747	9.07182	4.4061	3.09284	0	0	4.4061	3.09284	9.07182	1.06584	11.3971	-11.877	-1.56796	0.469617	0.000699796	6.62618e-05	0.354492	1	0.0999203	0.0206744	1	gnl|BL_ORD_ID|414167 sp|Q9M3V8|RS6_ASPOF 40S ribosomal protein S6 OS=Asparagus officinalis OX=4686 GN=rps6 PE=2 SV=1//3.40452e-134
MS.gene42770	MS.gene42770	chr8.2:55146059-55148302	822	0.860834	4.68707	0.840824	0	0	4.68707	0.840824	0.860834	-2.49157	9.45266	-11.9696	-0.0278667	0.138701	0.00514458	2.11258e-08	0.994471	1	0.315403	2.59698e-05	1	gnl|BL_ORD_ID|278793 sp|A4GSN8|NUA_ARATH Nuclear-pore anchor OS=Arabidopsis thaliana OX=3702 GN=NUA PE=1 SV=1//5.08805e-12
MS.gene017720	-	chr7.3:20030456-20037479	324	1.02152	2.06699	0.692604	0	0	2.06699	0.692604	1.02152	-1.02643	10.5083	-12.0079	-0.511151	0.296145	0.00179096	1.75505e-08	0.768244	1	0.173471	2.24327e-05	1	gnl|BL_ORD_ID|438302 sp|Q9XIE1|SNL5_ARATH Paired amphipathic helix protein Sin3-like 5 OS=Arabidopsis thaliana OX=3702 GN=SNL5 PE=3 SV=3//1.20735e-17
MS.gene029944	-	chr6.2:68155483-68165087	708	1.32437	1.7047	1.26733	0	0	1.7047	1.26733	1.32437	-0.382518	11.6856	-12.051	-0.0254642	0.693796	0.000515318	1.91515e-08	0.989573	1	0.0824484	2.38029e-05	1	gnl|BL_ORD_ID|382703 sp|Q6NME6|RLF19_ARATH Protein RALF-like 19 OS=Arabidopsis thaliana OX=3702 GN=RALFL19 PE=3 SV=1//1.77716e-21
MS.gene059657	MS.gene059657	38017:7558-11847	1004	1.6843	2.70175	1.5861	0	0	2.70175	1.5861	1.6843	-0.720999	11.3785	-12.0949	-0.0324151	0.672719	0.00071886	1.07923e-08	0.989863	1	0.101374	1.47141e-05	1	gnl|BL_ORD_ID|231135 sp|P19446|MDHG_CITLA Malate dehydrogenase, glyoxysomal OS=Citrullus lanatus OX=3654 PE=1 SV=1//0
MS.gene80026	-	chr6.1:5187963-5196823	1042	0.637595	1.30959	1.07792	0	0	1.30959	1.07792	0.637595	-1.0903	11.7876	-12.1132	0.761327	0.521633	0.000456419	1.06065e-08	0.749326	1	0.0760631	1.45491e-05	1	gnl|BL_ORD_ID|311923 sp|Q8VYR5|PP351_ARATH Pentatricopeptide repeat-containing protein At4g35850, mitochondrial OS=Arabidopsis thaliana OX=3702 GN=At4g35850 PE=1 SV=1//1.93891e-149
MS.gene042442	MS.gene042442	chr7.2:21873703-21877755	1899	0.383167	3.34252	2.12191	0	0	3.34252	2.12191	0.383167	-3.14861	11.7176	-12.341	2.48064	0.0644016	0.00049943	3.76255e-09	0.315871	1	0.0809456	5.87795e-06	1	gnl|BL_ORD_ID|42876 sp|A7LXU3|BGH3B_BACO1 Beta-glucosidase BoGH3B OS=Bacteroides ovatus (strain ATCC 8483 / DSM 1896 / JCM 5824 / NCTC 11153) OX=411476 GN=BACOVA_02659 PE=1 SV=1//1.17056e-78
MS.gene46560	MS.gene46560	chr7.1:58689718-58696036	1788	1.58181	2.39307	0.404988	0	0	2.39307	0.404988	1.58181	-0.602933	9.97345	-12.4615	-1.9317	0.523271	0.00310871	2.78515e-09	0.250011	1	0.239616	4.64109e-06	1	gnl|BL_ORD_ID|443161 sp|Q8VYF9|SRGT1_ARATH Peptidyl serine alpha-galactosyltransferase OS=Arabidopsis thaliana OX=3702 GN=SERGT1 PE=2 SV=1//8.82325e-132
MS.gene38817	MS.gene38817	chr7.1:16738365-16741494	2616	3.01205	5.05806	2.91662	0	0	5.05806	2.91662	3.01205	-0.796108	11.7216	-12.5552	-0.0420106	0.64137	0.000493412	8.39173e-10	0.986141	1	0.0804086	1.73193e-06	1	gnl|BL_ORD_ID|66113 sp|P42730|CLPB1_ARATH Chaperone protein ClpB1 OS=Arabidopsis thaliana OX=3702 GN=CLPB1 PE=1 SV=2//0
MS.gene71886	MS.gene71886	chr8.3:19341781-19344141	839	2.842	6.66401	1.99957	0	0	6.66401	1.99957	2.842	-1.28959	10.8535	-12.561	-0.450004	0.448053	0.0012425	1.29553e-09	0.8496	1	0.140281	2.4491e-06	1	gnl|BL_ORD_ID|205464 sp|Q9C5X3|KEULE_ARATH SNARE-interacting protein KEULE OS=Arabidopsis thaliana OX=3702 GN=KEU PE=1 SV=2//1.19969e-136
MS.gene69186	MS.gene69186	chr7.3:26926431-26929665	642	7.95619	4.76014	4.19181	0	0	4.76014	4.19181	7.95619	0.658632	12.3739	-12.575	-0.887714	0.606784	0.000253693	1.99389e-06	0.608253	1	0.0520408	0.00124943	1	gnl|BL_ORD_ID|443969 sp|Q8W1Y0|SSC14_ARATH Sister chromatid cohesion 1 protein 4 OS=Arabidopsis thaliana OX=3702 GN=SYN4 PE=2 SV=1//2.95598e-82
MS.gene27568	MS.gene27568	chr7.2:30450171-30462980	2667	1.24876	1.38704	0.615449	0	0	1.38704	0.615449	1.24876	-0.180147	11.591	-12.719	-0.988007	0.838836	0.00057655	2.79462e-10	0.560948	1	0.0884636	6.90855e-07	1	gnl|BL_ORD_ID|206699 sp|Q9LPC6|KINUB_ARATH Kinesin-like protein KIN-UB OS=Arabidopsis thaliana OX=3702 GN=KINUB PE=1 SV=2//0
MS.gene04803	MS.gene04803	chr4.4:2474926-2479613	1848	1.56702	3.83118	1.57266	0	0	3.83118	1.57266	1.56702	-1.30297	11.4958	-12.7382	0.016415	0.450511	0.000640506	2.60202e-10	0.995375	1	0.0944675	6.5039e-07	1	gnl|BL_ORD_ID|460669 sp|A0JJX5|SYT4_ARATH Synaptotagmin-4 OS=Arabidopsis thaliana OX=3702 GN=SYT4 PE=2 SV=1//7.33529e-06
MS.gene64071	MS.gene64071	chr7.4:10658894-10661512	671	5.48276	6.66273	3.85591	0	0	6.66273	3.85591	5.48276	-0.345816	11.9477	-12.7576	-0.496141	0.865199	0.000389306	0.000216182	0.801309	1	0.0689555	0.0454083	1	gnl|BL_ORD_ID|317670 sp|P46466|PRS4_ORYSJ 26S proteasome regulatory subunit 4 homolog OS=Oryza sativa subsp. japonica OX=39947 GN=TBP2 PE=2 SV=2//7.31573e-126
MS.gene54328	MS.gene54328	chr2.3:69723381-69726791	1761	4.13089	6.15861	3.85443	0	0	6.15861	3.85443	4.13089	-0.621628	12.3286	-12.9601	-0.0455878	0.719495	0.000265373	4.80077e-11	0.985478	1	0.0538083	1.56519e-07	1	gnl|BL_ORD_ID|295851 sp|P51850|PDC1_PEA Pyruvate decarboxylase 1 OS=Pisum sativum OX=3888 GN=PDC1 PE=2 SV=1//0
MS.gene61245	MS.gene61245	chr8.2:23052701-23061193	888	1.15824	2.66363	1.38416	0	0	2.66363	1.38416	1.15824	-1.21714	12.1682	-13.0721	0.269281	0.484807	0.000310693	2.48604e-11	0.913375	1	0.0595594	9.16818e-08	1	-//-
MS.gene21138	MS.gene21138	chr1.4:41321147-41325195	3306	5.98632	6.61649	2.86718	0	0	6.61649	2.86718	5.98632	-0.175893	12.0683	-13.3084	-1.07276	0.841112	0.000340078	6.79695e-12	0.534544	1	0.0629812	3.25328e-08	1	gnl|BL_ORD_ID|304465 sp|P15001|PHYA_PEA Phytochrome A OS=Pisum sativum OX=3888 GN=PHYA PE=3 SV=1//0
MS.gene051826	-	chr8.2:6963650-6970464	1695	0.746058	5.23681	1.96893	0	0	5.23681	1.96893	0.746058	-2.554	12.2776	-13.4501	1.36235	0.0609361	0.000276788	7.33984e-12	0.507641	1	0.0554747	3.32648e-08	1	gnl|BL_ORD_ID|259682 sp|F4K5J1|MYO17_ARATH Myosin-17 OS=Arabidopsis thaliana OX=3702 GN=XI-K PE=1 SV=2//3.38367e-55
MS.gene44059	MS.gene44059	chr1.3:57956965-57964360	2719	1.85586	4.31762	1.67833	0	0	4.31762	1.67833	1.85586	-1.26198	12.2458	-13.5621	-0.0904345	0.466035	0.000288082	1.83971e-12	0.97069	1	0.056883	1.18246e-08	1	gnl|BL_ORD_ID|30754 sp|Q8H1Q5|AT18H_ARATH Autophagy-related protein 18h OS=Arabidopsis thaliana OX=3702 GN=ATG18H PE=2 SV=1//0
MS.gene002164	MS.gene002164	chr2.2:71890511-71896160	2802	4.9521	6.12625	1.53678	0	0	6.12625	1.53678	4.9521	-0.321583	11.7316	-13.6608	-1.65114	0.710662	0.000492278	2.11892e-12	0.335066	1	0.080281	1.2883e-08	1	gnl|BL_ORD_ID|50641 sp|Q9SA65|CAP4_ARATH Putative clathrin assembly protein At1g03050 OS=Arabidopsis thaliana OX=3702 GN=At1g03050 PE=2 SV=1//0
MS.gene29085	MS.gene29085	chr4.2:32834461-32841850	1680	2.20261	5.62843	1.70813	0	0	5.62843	1.70813	2.20261	-1.38546	12.2699	-13.945	-0.328574	0.114869	0.000281479	2.54802e-13	0.85035	1	0.056198	2.49219e-09	1	gnl|BL_ORD_ID|455317 sp|F4JLM5|SYIC_ARATH Isoleucine--tRNA ligase, cytoplasmic OS=Arabidopsis thaliana OX=3702 GN=At4g10320 PE=2 SV=1//0
MS.gene24620	MS.gene24620	chr1.2:48937340-48940243	986	0.0494225	14.618	#N/A	#N/A	0	14.618	0	0.0494225	-8.17024	#N/A	-14.0401	-5.92159	0.00359521	#N/A	8.31627e-05	0.140162	0.344418	#N/A	0.0242117	1	gnl|BL_ORD_ID|11004 sp|Q9LZG0|ADK2_ARATH Adenosine kinase 2 OS=Arabidopsis thaliana OX=3702 GN=ADK2 PE=1 SV=1//0
MS.gene00430	MS.gene00430	chr1.4:3833090-3842126	1830	0.024008	6.52309	#N/A	#N/A	0	6.52309	0	0.024008	-8.10613	#N/A	-14.514	-6.47287	0.00582466	#N/A	6.37043e-05	0.0894237	0.455452	#N/A	0.0200995	1	gnl|BL_ORD_ID|445679 sp|Q9Y2H1|ST38L_HUMAN Serine/threonine-protein kinase 38-like OS=Homo sapiens OX=9606 GN=STK38L PE=1 SV=3//3.61723e-139
MS.gene034843	MS.gene034843	chr1.4:48691632-48698367	1191	0	1.75849	5.20083	0.974225	0.974225	1.75849	5.20083	0	-12.2439	2.19525	-0.69083	13.7504	0.000285821	0.208566	0.783805	1.81442e-15	0.0665815	1	1	1.32516e-11	gnl|BL_ORD_ID|438541 sp|Q9FG38|SNX1_ARATH Sorting nexin 1 OS=Arabidopsis thaliana OX=3702 GN=SNX1 PE=1 SV=1//0
MS.gene91718	MS.gene91718	chr7.2:39031334-39034522	558	0	0.131974	9.69329	2.97206	2.97206	0.131974	9.69329	0	-7.34342	1.52433	4.76326	13.5939	0.0421829	0.555804	0.0702924	6.67218e-05	1	1	1	0.0184323	gnl|BL_ORD_ID|476243 sp|P82874|TO203_ARATH Mitochondrial import receptor subunit TOM20-3 OS=Arabidopsis thaliana OX=3702 GN=TOM20-3 PE=1 SV=1//3.37335e-20
MS.gene066532	MS.gene066532	chr7.1:2515627-2520221	1482	0	3.32522	6.80059	4.56992	4.56992	3.32522	6.80059	0	-12.503	0.347469	0.751164	13.5813	0.000216028	0.84693	0.771678	7.99275e-15	0.0557252	1	1	4.67001e-11	gnl|BL_ORD_ID|121190 sp|Q3ECP7|ERDL5_ARATH Sugar transporter ERD6-like 5 OS=Arabidopsis thaliana OX=3702 GN=At1g54730 PE=2 SV=2//0
MS.gene01786	MS.gene01786	chr2.3:71334621-71338481	720	0	2.75449	7.50387	6.06252	6.06252	2.75449	7.50387	0	-11.9803	0.079659	1.43253	13.476	0.000385579	0.927101	0.422166	1.29742e-14	0.0826511	1	1	7.21958e-11	gnl|BL_ORD_ID|149537 sp|Q84WK5|GID8_ARATH Protein GID8 homolog OS=Arabidopsis thaliana OX=3702 GN=GID8 PE=1 SV=1//7.85743e-130
MS.gene032917	MS.gene032917	chr5.3:28739765-28747692	708	0	0.041057	2.64065	0.052358	0.052358	0.041057	2.64065	0	-6.96418	5.45673	0.642622	13.0277	0.0612218	0.00283444	0.803876	1.31357e-09	1	0.226749	1	2.06039e-06	gnl|BL_ORD_ID|390249 sp|P42813|RNS1_ARATH Ribonuclease 1 OS=Arabidopsis thaliana OX=3702 GN=RNS1 PE=1 SV=1//4.69391e-114
XLOC_109875	XLOC_109875	chr3.2:48688621-48692483	2967	0	1.54011	4.52862	5.50552	5.50552	1.54011	4.52862	0	-11.1427	-0.463146	2.12972	12.7714	0.000979789	0.856945	0.411686	0.000125746	0.156198	1	1	0.0290693	-
MS.gene65230	MS.gene65230	chr6.4:6548931-6556105	2910	0	1.83544	2.36916	1.57312	1.57312	1.83544	2.36916	0	-12.2881	0.384227	0.0710939	12.7155	0.000273632	0.828776	0.977927	1.07308e-11	0.064779	1	1	2.78647e-08	-//-
MS.gene066348	MS.gene066348	32536:5679-12083	1731	0	0.0107975	2.67849	0.289073	0.289073	0.0107975	2.67849	0	-4.9465	2.92142	4.80752	12.6925	0.234185	0.0909753	0.00336239	1.58677e-05	1	1	0.262929	0.00601047	gnl|BL_ORD_ID|326384 sp|Q9LRZ3|PUM24_ARATH Pumilio homolog 24 OS=Arabidopsis thaliana OX=3702 GN=APUM24 PE=1 SV=1//0
MS.gene007011	MS.gene007011	51724:2060-6666	1305	0	2.94795	3.71127	2.05633	2.05633	2.94795	3.71127	0	-12.4404	0.58011	-0.356893	12.6898	0.000232584	0.747359	0.844734	0.000134943	0.058996	1	1	0.0305895	gnl|BL_ORD_ID|46672 sp|Q8LFS6|BRN1L_ARATH RNA-binding protein BRN1 OS=Arabidopsis thaliana OX=3702 GN=BRN1 PE=2 SV=1//0
MS.gene09896	MS.gene09896	chr7.3:13182462-13187510	813	0	0.050622	3.26838	0.0621815	0.0621815	0.050622	3.26838	0	-6.62328	5.47542	0.612528	12.6886	0.0835218	0.0373104	0.82585	0.000137363	1	0.852383	1	0.0310478	gnl|BL_ORD_ID|509172 sp|Q9LF27|WDR12_ARATH Ribosome biogenesis protein WDR12 homolog OS=Arabidopsis thaliana OX=3702 GN=WDR12 PE=1 SV=1//7.48848e-135
MS.gene51858	MS.gene51858	50225:12608-16375	1180	0	1.59592	4.3196	1.98085	1.98085	1.59592	4.3196	0	-11.1594	0.898458	0.60627	12.6459	0.000962589	0.334467	0.736284	6.74323e-12	0.154426	1	1	1.87616e-08	gnl|BL_ORD_ID|302390 sp|A7PZL3|PGLR_VITVI Probable polygalacturonase OS=Vitis vinifera OX=29760 GN=GSVIVT00026920001 PE=1 SV=1//1.96204e-62
MS.gene005312	MS.gene005312	chr1.1:62272082-62290413	4341	0	0.101145	0.895821	0.221645	0.221645	0.101145	0.895821	0	-9.57079	1.75649	1.29278	12.6447	0.00506871	0.310575	0.603932	6.34548e-11	0.42231	1	1	1.33605e-07	gnl|BL_ORD_ID|220072 sp|P93655|LONM1_ARATH Lon protease homolog 1, mitochondrial OS=Arabidopsis thaliana OX=3702 GN=LON1 PE=1 SV=2//2.02682e-137
MS.gene018389	MS.gene018389	chr8.2:4973663-4978944	1539	0	3.09217	2.99446	2.9597	2.9597	3.09217	2.99446	0	-12.5987	-0.163205	0.230182	12.6278	0.000194898	0.948967	0.928728	0.000147013	0.051616	1	1	0.0327225	gnl|BL_ORD_ID|510837 sp|Q6KAE5|XB32_ORYSJ Probable E3 ubiquitin-protein ligase XBOS32 OS=Oryza sativa subsp. japonica OX=39947 GN=XBOS32 PE=2 SV=2//0
MS.gene058639	MS.gene058639	chr7.4:28130089-28140505	3372	#N/A	#N/A	1.48463	1.12132	1.12132	0	1.48463	0	#N/A	0.143052	12.3395	12.5449	#N/A	0.954906	0.000322723	0.00015812	#N/A	1	0.0608039	0.0345048	gnl|BL_ORD_ID|350218 sp|Q69ZJ7|RIC1_MOUSE RAB6A-GEF complex partner protein 1 OS=Mus musculus OX=10090 GN=Ric1 PE=1 SV=2//1.12001e-70
MS.gene06420	MS.gene06420	chr3.2:80174574-80183468	2520	0	0.479527	1.7102	1.60091	1.60091	0.479527	1.7102	0	-10.6642	-0.14803	2.03272	12.5386	0.00162662	0.873554	0.245377	4.73085e-11	0.215243	1	1	1.05301e-07	gnl|BL_ORD_ID|139308 sp|F4KF14|FTSI4_ARATH Probable inactive ATP-dependent zinc metalloprotease FTSHI 4, chloroplastic OS=Arabidopsis thaliana OX=3702 GN=FTSHI4 PE=1 SV=1//0
MS.gene90727	MS.gene90727	chr1.4:1566830-1570683	2112	#N/A	#N/A	3.8334	0	#N/A	#N/A	3.8334	0	#N/A	12.416	#N/A	12.4788	#N/A	0.000241272	#N/A	0.000169688	#N/A	0.0504446	#N/A	0.0363503	gnl|BL_ORD_ID|45247 sp|Q9SIW1|BLH7_ARATH BEL1-like homeodomain protein 7 OS=Arabidopsis thaliana OX=3702 GN=BLH7 PE=1 SV=1//1.28334e-99
MS.gene045349	MS.gene045349	chr3.4:79039149-79042186	1467	0	3.65872	4.85002	6.14916	6.14916	3.65872	4.85002	0	-12.0432	-0.620858	1.04524	12.4746	0.000359754	0.806322	0.682624	0.000170473	0.078516	1	1	0.0364517	gnl|BL_ORD_ID|429821 sp|O23264|SEBP1_ARATH Selenium-binding protein 1 OS=Arabidopsis thaliana OX=3702 GN=SBP1 PE=1 SV=1//0
MS.gene79453	MS.gene79453	chr3.3:16012512-16018105	804	0	2.79589	2.52128	0	0	2.79589	2.52128	0	-12.5362	12.4308	-12.4668	12.4629	0.000208239	0.000240179	0.000295931	0.000175525	0.0540826	0.0504007	0.0570537	0.0371243	-//-
MS.gene28988	MS.gene28988	chr4.2:32672637-32677553	1548	0	2.85747	2.87567	6.04596	6.04596	2.85747	2.87567	0	-12.3814	-1.33316	1.37446	12.4156	0.000248491	0.607738	0.601067	0.000181748	0.0612296	1	1	0.0379594	gnl|BL_ORD_ID|261618 sp|Q56YN3|NADK1_ARATH NAD(H) kinase 1 OS=Arabidopsis thaliana OX=3702 GN=NADK1 PE=1 SV=2//0
MS.gene052624	MS.gene052624	chr3.1:62191180-62193333	1150	0	3.06705	6.48691	1.73884	1.73884	3.06705	6.48691	0	-11.4017	1.64389	-0.65632	12.4088	0.000731433	0.122301	0.723275	8.94364e-10	0.128346	1	1	1.45155e-06	gnl|BL_ORD_ID|308325 sp|Q9FXD8|PLY5_ARATH Probable pectate lyase 5 OS=Arabidopsis thaliana OX=3702 GN=At1g67750 PE=2 SV=2//0
MS.gene56415	MS.gene56415	chr4.4:28723209-28738386	3651	0	0.0900115	0.882072	1.00931	1.00931	0.0900115	0.882072	0	-9.13041	-0.377356	3.64507	12.3871	0.00785662	0.804624	0.0551019	3.35638e-06	0.534313	1	1	0.00172781	gnl|BL_ORD_ID|264640 sp|Q5S2C4|NCKP1_ARATH Protein NAP1 OS=Arabidopsis thaliana OX=3702 GN=NAP1 PE=1 SV=2//0
MS.gene054992	MS.gene054992	chr7.4:36732818-36737663	2256	#N/A	#N/A	2.80321	0	#N/A	#N/A	2.80321	0	#N/A	12.295	#N/A	12.3578	#N/A	0.000271914	#N/A	0.000193029	#N/A	0.0548424	#N/A	0.039573	gnl|BL_ORD_ID|4852 sp|Q9LD43|ACCA_ARATH Acetyl-coenzyme A carboxylase carboxyl transferase subunit alpha, chloroplastic OS=Arabidopsis thaliana OX=3702 GN=CAC3 PE=1 SV=1//0
MS.gene004556	MS.gene004556	chr2.2:52562939-52570265	2367	#N/A	#N/A	1.74721	0	#N/A	#N/A	1.74721	0	#N/A	12.2902	#N/A	12.3223	#N/A	0.000275953	#N/A	0.000204168	#N/A	0.0554122	#N/A	0.041018	gnl|BL_ORD_ID|207556 sp|B9FMJ3|KN13A_ORYSJ Kinesin-like protein KIN-13A OS=Oryza sativa subsp. japonica OX=39947 GN=KIN13A PE=1 SV=1//0
MS.gene012894	MS.gene012894	23494:25948-31979	2721	#N/A	#N/A	2.17127	0	#N/A	#N/A	2.17127	0	#N/A	12.2423	#N/A	12.3051	#N/A	0.000286672	#N/A	0.000205167	#N/A	0.0567165	#N/A	0.0410883	gnl|BL_ORD_ID|463685 sp|F4K4L7|TAF4B_ARATH Transcription initiation factor TFIID subunit 4b OS=Arabidopsis thaliana OX=3702 GN=TAF4B PE=1 SV=1//5.76625e-147
MS.gene02997	MS.gene02997	chr1.3:62687571-62690284	450	0	3.80221	4.59003	4.83874	4.83874	3.80221	4.59003	0	-12.0445	-0.303584	0.510493	12.2606	0.000359668	0.740781	0.775409	1.33986e-10	0.078516	1	1	2.54586e-07	gnl|BL_ORD_ID|12392 sp|Q9ZNV8|AHP2_ARATH Histidine-containing phosphotransfer protein 2 OS=Arabidopsis thaliana OX=3702 GN=AHP2 PE=1 SV=1//2.49255e-45
MS.gene29117	MS.gene29117	chr3.4:72216452-72219912	2298	#N/A	#N/A	3.43885	1.87839	1.87839	0	3.43885	0	#N/A	0.650469	11.4948	12.1924	#N/A	0.708656	0.000800198	1.97849e-10	#N/A	1	0.112179	3.58448e-07	gnl|BL_ORD_ID|106217 sp|Q8TB45|DPTOR_HUMAN DEP domain-containing mTOR-interacting protein OS=Homo sapiens OX=9606 GN=DEPTOR PE=1 SV=2//9.47169e-06
XLOC_086016	XLOC_086016	chr2.3:51192068-51198378	2398	0	1.54677	1.88461	0.480994	0.480994	1.54677	1.88461	0	-11.8572	1.73013	-1.39065	12.1808	0.000439465	0.320731	0.579746	8.48446e-10	0.0905256	1	1	1.38666e-06	-
MS.gene46910	MS.gene46910	chr8.2:15600079-15603136	1254	0	3.18183	3.87867	4.61014	4.61014	3.18183	3.87867	0	-11.8514	-0.49469	0.829959	12.1774	0.000441071	0.600785	0.640655	7.32047e-10	0.0905256	1	1	1.20485e-06	gnl|BL_ORD_ID|128837 sp|Q9SQI3|FATB_GOSHI Palmitoyl-acyl carrier protein thioesterase, chloroplastic OS=Gossypium hirsutum OX=3635 GN=FATB1 PE=1 SV=1//0
MS.gene66499	MS.gene66499	chr5.3:49723263-49725667	1128	0	1.1337	4.70435	13.419	13.419	1.1337	4.70435	0	-10.0183	-1.72051	3.85717	12.1307	0.00320992	0.0747647	0.0296068	1.45873e-09	0.324526	1	0.78109	2.25777e-06	gnl|BL_ORD_ID|478449 sp|Q9C9S4|TPPB_ARATH Trehalose-phosphate phosphatase B OS=Arabidopsis thaliana OX=3702 GN=TPPB PE=1 SV=1//3.5602e-150
MS.gene021256	-	chr6.1:44448226-44452238	477	0	0.166161	2.48743	0.73697	0.73697	0.166161	2.48743	0	-8.021	1.50837	2.41225	11.9326	0.00669218	0.148458	0.107884	1.95192e-09	0.489507	1	1	2.90565e-06	-//-
MS.gene55698	MS.gene55698	57369:3966-8685	1149	0	1.0754	2.01322	0.835771	0.835771	1.0754	2.01322	0	-10.9148	1.03117	-0.0679152	11.8696	0.00125066	0.550297	0.979052	1.71826e-09	0.183021	1	1	2.60765e-06	gnl|BL_ORD_ID|549379 sp|Q08448|YO059_YEAST Putative lipase YOR059C OS=Saccharomyces cerevisiae (strain ATCC 204508 / S288c) OX=559292 GN=YOR059C PE=1 SV=1//2.40045e-14
MS.gene069718	MS.gene069718	chr8.4:54299835-54304074	1200	0	0.147171	2.2205	1.64737	1.64737	0.147171	2.2205	0	-8.00366	0.20532	3.64176	11.8596	0.0230061	0.834862	0.0384721	2.1603e-09	0.941397	1	0.872632	3.19549e-06	gnl|BL_ORD_ID|252758 sp|Q0WU02|MTP10_ARATH Metal tolerance protein 10 OS=Arabidopsis thaliana OX=3702 GN=MTP10 PE=2 SV=1//0
XLOC_220232	XLOC_220232	chr5.4:62459304-62463495	3335	0	0.0053555	4.77057	0.114021	0.114021	0.0053555	4.77057	0	-3.07355	4.52833	3.96068	11.5926	0.747812	0.0032852	0.114495	8.90286e-08	1	0.246566	1	8.35625e-05	-
MS.gene052380	MS.gene052380	chr7.4:11805285-11812185	4587	0	0.877955	1.10243	0.791496	0.791496	0.877955	1.10243	0	-11.278	0.251882	0.0101969	11.5478	0.000841875	0.809722	0.996858	1.14294e-08	0.140799	1	1	1.36285e-05	gnl|BL_ORD_ID|3999 sp|Q7GB25|AB5C_ARATH ABC transporter C family member 5 OS=Arabidopsis thaliana OX=3702 GN=ABCC5 PE=2 SV=2//0
MS.gene05937	MS.gene05937	chr4.4:2806151-2808703	332	0	0.153791	2.83875	0.047482	0.047482	0.153791	2.83875	0	-7.32971	5.58746	-1.43564	11.488	0.0102422	0.000927549	0.490667	4.09881e-08	0.616121	0.118275	1	4.33149e-05	gnl|BL_ORD_ID|360584 sp|A0L5Z9|RL17_MAGMM 50S ribosomal protein L17 OS=Magnetococcus marinus (strain ATCC BAA-1437 / JCM 17883 / MC-1) OX=156889 GN=rplQ PE=3 SV=1//2.14117e-36
MS.gene007528	MS.gene007528	chr7.1:8799869-8814108	4632	0	0.0256465	0.502973	0.573746	0.573746	0.0256465	0.502973	0	-7.12801	-0.416666	4.76577	11.4608	0.0519347	0.669876	0.00588176	1.79531e-08	1	1	0.353692	2.02752e-05	gnl|BL_ORD_ID|245462 sp|Q9M658|MOM1_ARATH Helicase protein MOM1 OS=Arabidopsis thaliana OX=3702 GN=MOM1 PE=1 SV=1//1.79019e-77
MS.gene065229	MS.gene065229	chr8.1:36638584-36644848	998	0	0.622453	1.1179	0.189097	0.189097	0.622453	1.1179	0	-10.5351	2.33159	-1.42259	11.4246	0.00187691	0.176967	0.570649	2.70562e-08	0.233885	1	1	2.98272e-05	gnl|BL_ORD_ID|19225 sp|Q9LYK6|APRF1_ARATH Protein ANTHESIS POMOTING FACTOR 1 OS=Arabidopsis thaliana OX=3702 GN=APRF1 PE=2 SV=1//3.14917e-106
MS.gene09410	MS.gene09410	51105:82600-90544	1437	0	1.18483	0.826534	1.27742	1.27742	1.18483	0.826534	0	-11.9107	-0.822334	0.264295	11.3464	0.000413359	0.655468	0.916603	1.77629e-07	0.0870529	1	1	0.000149331	gnl|BL_ORD_ID|507982 sp|F4JT76|VPS54_ARATH Vacuolar protein sorting-associated protein 54, chloroplastic OS=Arabidopsis thaliana OX=3702 GN=VPS54 PE=1 SV=1//3.52659e-173
MS.gene98993	MS.gene98993	11361:5921-7940	1680	0	0.459166	3.19439	0.4448	0.4448	0.459166	3.19439	0	-8.46703	2.64049	0.243868	11.3222	0.015097	0.13175	0.923521	8.57302e-08	0.763182	1	1	8.11182e-05	gnl|BL_ORD_ID|308542 sp|Q9SRX4|PME7_ARATH Probable pectinesterase/pectinesterase inhibitor 7 OS=Arabidopsis thaliana OX=3702 GN=PME7 PE=2 SV=1//0
MS.gene027993	-	chr5.2:19357697-19360273	441	0	0.573157	2.5718	1.69449	1.69449	0.573157	2.5718	0	-9.08171	0.358601	1.78234	11.2253	0.000264765	0.737229	0.144907	9.57762e-08	0.0634239	1	1	8.91795e-05	-//-
MS.gene059053	MS.gene059053	chr2.4:55908168-55910952	687	0	1.01988	2.16208	2.40982	2.40982	1.01988	2.16208	0	-10.1853	-0.396002	1.40252	11.2066	0.0027275	0.707219	0.438044	7.40037e-08	0.29468	1	1	7.20648e-05	gnl|BL_ORD_ID|227266 sp|P43363|MAGAA_HUMAN Melanoma-associated antigen 10 OS=Homo sapiens OX=9606 GN=MAGEA10 PE=2 SV=2//2.27102e-10
MS.gene44210	MS.gene44210	chr8.1:31944421-31972007	648	0	0.32495	0.369185	0.570439	0.570439	0.32495	0.369185	0	-10.9064	-0.859169	1.1162	11.1493	0.00126493	0.440909	0.54721	1.1683e-07	0.184164	1	1	0.000105831	gnl|BL_ORD_ID|18734 sp|Q8VYV9|APF1_ARATH Aspartyl protease family protein 1 OS=Arabidopsis thaliana OX=3702 GN=APF1 PE=1 SV=1//9.05188e-13
MS.gene00768	MS.gene00768	chr2.3:64490684-64497469	1797	0	0.104012	0.824627	0.340112	0.340112	0.104012	0.824627	0	-8.17988	1.06579	1.87242	11.122	0.0196503	0.374756	0.317353	5.24899e-07	0.872026	1	1	0.000368394	gnl|BL_ORD_ID|59320 sp|A0A0P0XII1|CERK1_ORYSJ Chitin elicitor receptor kinase 1 OS=Oryza sativa subsp. japonica OX=39947 GN=CERK1 PE=1 SV=1//0
MS.gene003446	MS.gene003446	chr4.3:32473193-32477500	528	0	0.130578	1.23711	0.968839	0.968839	0.130578	1.23711	0	-7.76929	0.113047	3.15551	11.0285	0.00593586	0.919118	0.0258081	2.11248e-07	0.459042	1	0.735748	0.000172627	-//-
MS.gene067109	MS.gene067109	chr7.2:91415767-91419568	1062	0	0.20632	1.39038	0.551926	0.551926	0.20632	1.39038	0	-8.25172	1.10349	1.68558	11.0214	0.00515853	0.382085	0.311385	1.60489e-07	0.4271	1	1	0.000138406	gnl|BL_ORD_ID|341880 sp|Q84L30|RD23D_ARATH Ubiquitin receptor RAD23d OS=Arabidopsis thaliana OX=3702 GN=RAD23D PE=1 SV=2//7.63391e-138
MS.gene22569	MS.gene22569	chr5.2:4161426-4165458	519	0	0.43166	1.21952	1.20139	1.20139	0.43166	1.21952	0	-9.48389	-0.209843	1.63567	10.9218	0.00555594	0.848756	0.371475	2.54388e-07	0.444882	1	1	0.000199509	gnl|BL_ORD_ID|539331 sp|Q55720|YC49L_SYNY3 Ycf49-like protein OS=Synechocystis sp. (strain PCC 6803 / Kazusa) OX=1111708 GN=sll0608 PE=3 SV=1//5.51229e-37
MS.gene024090	MS.gene024090	chr7.4:25611479-25614258	876	0	1.7557	1.71342	1.56287	1.56287	1.7557	1.71342	0	-10.9642	-0.120303	-0.0077109	10.853	0.0011952	0.952177	0.998067	1.81097e-05	0.178034	1	1	0.00666115	gnl|BL_ORD_ID|391484 sp|Q55FA4|RPA43_DICDI Probable DNA-directed RNA polymerase I subunit RPA43 OS=Dictyostelium discoideum OX=44689 GN=rpa43 PE=2 SV=1//1.37392e-09
MS.gene060381	MS.gene060381	chr7.4:1232545-1235598	1338	0	0.850953	1.48586	0.747274	0.747274	0.850953	1.48586	0	-9.9488	0.768815	0.109672	10.804	0.00344197	0.664095	0.967496	4.11526e-07	0.337451	1	1	0.000296847	gnl|BL_ORD_ID|205449 sp|O65155|KELP_ARATH RNA polymerase II transcriptional coactivator KELP OS=Arabidopsis thaliana OX=3702 GN=KELP PE=1 SV=1//6.5241e-38
MS.gene036972	MS.gene036972	chr2.1:54277624-54279062	732	0	0.999109	3.05642	4.16431	4.16431	0.999109	3.05642	0	-9.10085	-0.667728	2.34683	10.7608	0.00813838	0.537957	0.196558	4.9397e-07	0.545527	1	1	0.000350902	gnl|BL_ORD_ID|62863 sp|Q7M443|CHIT2_TULBA Chitinase 2 OS=Tulipa bakeri OX=110455 PE=1 SV=1//1.71986e-26
MS.gene055244	MS.gene055244	chr7.4:41145387-41147349	996	#N/A	#N/A	2.19345	0.57111	0.57111	0	2.19345	0	#N/A	1.69274	8.96298	10.7123	#N/A	0.349278	0.0106272	2.6948e-06	#N/A	1	0.480801	0.00146808	-//-
MS.gene81492	MS.gene81492	chr6.4:20972630-20977617	823	#N/A	#N/A	0.835065	0.276333	0.276333	0	0.835065	0	#N/A	1.365	9.26386	10.6862	#N/A	0.435715	0.00764195	8.16835e-07	#N/A	1	0.406324	0.000524462	gnl|BL_ORD_ID|289548 sp|Q8GXT7|P4H12_ARATH Probable prolyl 4-hydroxylase 12 OS=Arabidopsis thaliana OX=3702 GN=P4H12 PE=2 SV=1//2.57196e-74
MS.gene02430	MS.gene02430	chr5.3:11989667-11993411	2322	#N/A	#N/A	1.06407	0.234869	0.234869	0	1.06407	0	#N/A	1.97267	8.62351	10.6419	#N/A	0.349614	0.0140145	0.000197732	#N/A	1	0.553201	0.0402898	gnl|BL_ORD_ID|347748 sp|Q8VXX4|RFC3_ARATH Replication factor C subunit 3 OS=Arabidopsis thaliana OX=3702 GN=RFC3 PE=2 SV=1//6.3114e-79
MS.gene67061	MS.gene67061	chr3.4:93241223-93245494	2391	0	0.336878	0.923594	0.221203	0.221203	0.336878	0.923594	0	-9.10085	1.85363	-0.306583	10.617	0.00813836	0.299431	0.905094	2.2911e-06	0.545527	1	1	0.00126489	gnl|BL_ORD_ID|306518 sp|P93400|PLDA1_TOBAC Phospholipase D alpha 1 OS=Nicotiana tabacum OX=4097 GN=PLD1 PE=2 SV=2//0
MS.gene020478	MS.gene020478	chr4.1:2013143-2026514	2724	0	0.403014	0.294071	0.0096035	0.0096035	0.403014	0.294071	0	-11.0019	4.57983	-4.9399	10.6159	0.00114333	0.0048575	0.0309468	1.89051e-05	0.173544	0.306786	0.795997	0.00687145	gnl|BL_ORD_ID|450967 sp|F4JJT9|SYDM_ARATH Aspartate--tRNA ligase, chloroplastic/mitochondrial OS=Arabidopsis thaliana OX=3702 GN=At4g33760 PE=2 SV=1//0
MS.gene79449	MS.gene79449	chr3.1:15433909-15441005	1707	0	0.178432	0.533587	0.169978	0.169978	0.178432	0.533587	0	-9.0215	1.44115	0.0914607	10.551	0.00879366	0.414723	0.974822	1.76043e-06	0.567134	1	1	0.00102858	gnl|BL_ORD_ID|505227 sp|Q9FNQ0|VIP4_ARATH Protein LEO1 homolog OS=Arabidopsis thaliana OX=3702 GN=VIP4 PE=1 SV=1//8.92723e-113
MS.gene018627	MS.gene018627	chr7.2:12609626-12617030	4095	#N/A	#N/A	0.518192	0.136279	0.136279	0	0.518192	0	#N/A	1.67229	8.81883	10.5478	#N/A	0.356304	0.0121425	5.06179e-06	#N/A	1	0.511596	0.00238508	gnl|BL_ORD_ID|296352 sp|Q76CU2|PDR1_TOBAC Pleiotropic drug resistance protein 1 OS=Nicotiana tabacum OX=4097 GN=PDR1 PE=2 SV=1//8.90254e-26
MS.gene38461	MS.gene38461	chr3.4:63013903-63016380	711	0	0.341021	1.51261	0.881979	0.881979	0.341021	1.51261	0	-8.33907	0.581938	1.65721	10.5459	0.0169402	0.750809	0.508733	5.0612e-06	0.810297	1	1	0.00238508	-//-
MS.gene56570	MS.gene56570	chr4.4:29264928-29269840	1773	0	0.417058	0.760928	0.50915	0.50915	0.417058	0.760928	0	-9.6107	0.342731	0.582562	10.5255	0.00486716	0.847329	0.815257	1.37472e-06	0.412595	1	1	0.000836692	gnl|BL_ORD_ID|56814 sp|Q9FKE6|CCT15_ARATH Cyclin-T1-5 OS=Arabidopsis thaliana OX=3702 GN=CYCT1-5 PE=1 SV=2//9.57405e-180
MS.gene78289	MS.gene78289	chr6.4:56509550-56513805	1734	0	0.139974	0.872349	1.08424	1.08424	0.139974	0.872349	0	-7.94498	-0.544041	3.10754	10.5129	0.0035678	0.611123	0.0192674	1.45027e-06	0.343377	1	0.645575	0.000878099	gnl|BL_ORD_ID|138244 sp|Q9SZL8|FRS5_ARATH Protein FAR1-RELATED SEQUENCE 5 OS=Arabidopsis thaliana OX=3702 GN=FRS5 PE=1 SV=1//9.33568e-22
MS.gene34617	-	chr8.1:47606224-47644375	540	#N/A	#N/A	1.03724	0.209706	0.209706	0	1.03724	0	#N/A	2.43329	7.97574	10.4658	#N/A	0.052593	0.00347498	2.09928e-06	#N/A	0.974127	0.266802	0.00118223	gnl|BL_ORD_ID|199701 sp|Q9SSE9|JMJ25_ARATH Lysine-specific demethylase JMJ25 OS=Arabidopsis thaliana OX=3702 GN=JMJ25 PE=1 SV=1//1.81541e-23
MS.gene70183	MS.gene70183	chr4.1:7994217-7996764	1428	0	0.196741	1.39696	1.45622	1.45622	0.196741	1.39696	0	-7.61459	-0.281959	3.14079	10.457	0.0116152	0.801413	0.0404491	1.69076e-06	0.659739	1	0.890027	0.000995344	gnl|BL_ORD_ID|3577 sp|Q38967|AAP2_ARATH Amino acid permease 2 OS=Arabidopsis thaliana OX=3702 GN=AAP2 PE=1 SV=1//0
MS.gene63997	-	chr1.4:971146-976153	954	0	0.114736	1.09663	1.49076	1.49076	0.114736	1.09663	0	-7.0846	-0.517933	3.87945	10.4333	0.0158371	0.654844	0.00739103	3.53419e-06	0.784175	1	0.399204	0.00179172	-//-
MS.gene031917	MS.gene031917	chr3.4:70997970-71002716	1713	0	0.25003	0.739066	0.284834	0.284834	0.25003	0.739066	0	-8.83041	1.13425	0.479639	10.4303	0.0106492	0.329554	0.799552	1.8608e-06	0.627346	1	1	0.00107116	gnl|BL_ORD_ID|210202 sp|Q9FLB5|LAC12_ARATH Laccase-12 OS=Arabidopsis thaliana OX=3702 GN=LAC12 PE=2 SV=1//0
XLOC_136431	XLOC_136431	chr3.4:37188501-37195605	1718	0	0.12359	0.476021	0.0954105	0.0954105	0.12359	0.476021	0	-8.38839	2.06835	-0.0731646	10.3787	0.0161956	0.234412	0.981851	2.42077e-06	0.79296	1	1	0.00132808	-
MS.gene004271	MS.gene004271	chr2.4:68584773-68588023	1365	0	0.673921	1.01443	0.632873	0.632873	0.673921	1.01443	0	-9.70456	0.464837	0.205774	10.3541	0.00442995	0.690448	0.915073	4.04319e-06	0.390556	1	1	0.00200625	gnl|BL_ORD_ID|263807 sp|Q94C70|NAT2_ARATH Nucleobase-ascorbate transporter 2 OS=Arabidopsis thaliana OX=3702 GN=NAT2 PE=2 SV=2//0
MS.gene04533	MS.gene04533	chr3.4:58941984-58956021	4050	#N/A	#N/A	0.237732	0	#N/A	#N/A	0.237732	0	#N/A	10.2749	#N/A	10.337	#N/A	0.000255557	#N/A	0.000172044	#N/A	0.0523292	#N/A	0.0367202	gnl|BL_ORD_ID|3949 sp|Q7PC88|AB31G_ARATH ABC transporter G family member 31 OS=Arabidopsis thaliana OX=3702 GN=ABCG31 PE=1 SV=1//1.05911e-25
MS.gene004762	MS.gene004762	chr1.2:57097020-57104867	1776	0	0.157369	0.407405	0.133269	0.133269	0.157369	0.407405	0	-8.87724	1.40818	0.0617164	10.3243	0.0101407	0.483619	0.983532	0.000143009	0.611631	1	1	0.0321066	gnl|BL_ORD_ID|28133 sp|Q9LSW2|ARP9_ARATH Actin-related protein 9 OS=Arabidopsis thaliana OX=3702 GN=ARP9 PE=2 SV=1//0
MS.gene23396	MS.gene23396	chr8.2:62425842-62429727	525	#N/A	#N/A	0.835646	0.300868	0.300868	0	0.835646	0	#N/A	1.22654	9.03347	10.3219	#N/A	0.482717	0.0095321	2.76203e-06	#N/A	1	0.455274	0.00149773	gnl|BL_ORD_ID|41412 sp|Q8L649|BB_ARATH E3 ubiquitin ligase BIG BROTHER OS=Arabidopsis thaliana OX=3702 GN=BB PE=1 SV=1//1.00864e-63
MS.gene26660	MS.gene26660	chr4.1:21937378-21938941	576	#N/A	#N/A	2.07296	0.839275	0.839275	0	2.07296	0	#N/A	1.07957	9.19092	10.3187	#N/A	0.540971	0.00849987	2.85691e-06	#N/A	1	0.429757	0.00154202	gnl|BL_ORD_ID|385455 sp|Q9FFH1|RLT2_ARATH Homeobox-DDT domain protein RLT2 OS=Arabidopsis thaliana OX=3702 GN=RLT2 PE=1 SV=1//5.74045e-34
MS.gene31277	MS.gene31277	chr2.4:7731243-7739839	1053	0	0.032917	0.377353	0.054724	0.054724	0.032917	0.377353	0	-6.77933	2.50347	1.039	10.3147	0.0710001	0.052517	0.612928	3.81194e-06	1	0.973688	1	0.00191179	gnl|BL_ORD_ID|501432 sp|F4IHS9|UXT1_ARATH UDP-xylose transporter 1 OS=Arabidopsis thaliana OX=3702 GN=UXT1 PE=1 SV=1//4.00288e-166
MS.gene014387	MS.gene014387	chr3.2:90676925-90680047	1500	#N/A	#N/A	1.013	0.040241	0.040241	0	1.013	0	#N/A	4.41705	5.85287	10.3013	#N/A	0.0179546	0.191532	2.07647e-05	#N/A	0.608472	1	0.00739779	-//-
MS.gene032955	MS.gene032955	chr8.1:13976559-13978818	642	0	0.253999	1.39503	1.00395	1.00395	0.253999	1.39503	0	-7.89559	0.256353	2.13279	10.2864	0.0255617	0.834476	0.252919	4.24014e-06	0.991729	1	1	0.00206709	gnl|BL_ORD_ID|302579 sp|Q0WP96|PGR_ARATH Protein PGR OS=Arabidopsis thaliana OX=3702 GN=PGR PE=2 SV=1//8.67198e-90
MS.gene010388	MS.gene010388	chr5.4:10826140-10829409	1239	0	0.349417	0.956218	0.10223	0.10223	0.349417	0.956218	0	-8.85202	2.91807	-1.52831	10.2555	0.000606065	0.0397239	0.329445	5.26609e-06	0.113594	0.875813	1	0.00247138	gnl|BL_ORD_ID|48335 sp|Q338N2|C3H62_ORYSJ Zinc finger CCCH domain-containing protein 62 OS=Oryza sativa subsp. japonica OX=39947 GN=Os10g0391300 PE=4 SV=2//2.2251e-51
MS.gene42856	MS.gene42856	chr7.2:32178542-32179915	912	0	0.801829	2.1972	0.855666	0.855666	0.801829	2.1972	0	-8.82337	1.13399	0.253773	10.2202	0.0106384	0.34064	0.897808	3.97809e-06	0.627346	1	1	0.00197814	gnl|BL_ORD_ID|429708 sp|Q9SCU0|SDR2A_ARATH Short-chain dehydrogenase reductase 2a OS=Arabidopsis thaliana OX=3702 GN=SDR2a PE=3 SV=1//4.24184e-129
MS.gene68888	MS.gene68888	42522:747-2920	921	0	0.1181	1.38167	0.040232	0.040232	0.1181	1.38167	0	-6.62328	4.82371	-1.23129	10.2116	0.0835234	0.00532393	0.671934	4.25302e-06	1	0.321655	1	0.00206709	gnl|BL_ORD_ID|16926 sp|Q9SU94|ANM11_ARATH Protein arginine N-methyltransferase 1.1 OS=Arabidopsis thaliana OX=3702 GN=PRMT11 PE=1 SV=1//0
XLOC_317332	XLOC_317332	chr8.3:77056029-77059669	3265	0	0.624333	0.824707	0.407156	0.407156	0.624333	0.824707	0	-9.75558	0.793243	-0.319024	10.2084	0.00418456	0.657324	0.901481	4.14074e-06	0.377435	1	1	0.00203735	-
MS.gene36777	-	chr8.2:79055032-79057659	426	0	0.702769	1.4912	0.678826	0.678826	0.702769	1.4912	0	-9.16806	0.891718	0.131419	10.2022	0.00754107	0.452246	0.949227	4.13459e-06	0.521816	1	1	0.00203735	gnl|BL_ORD_ID|262521 sp|Q9SCL7|NAGK_ARATH Acetylglutamate kinase, chloroplastic OS=Arabidopsis thaliana OX=3702 GN=NAGK PE=1 SV=1//6.49797e-08
MS.gene011226	MS.gene011226	chr8.2:76144246-76145630	933	0	0.102041	2.07644	0.720808	0.720808	0.102041	2.07644	0	-5.84028	1.2975	3.03316	10.1525	0.175055	0.293881	0.111039	5.1145e-06	1	1	1	0.00240507	gnl|BL_ORD_ID|475791 sp|Q40392|TMVRN_NICGU TMV resistance protein N OS=Nicotiana glutinosa OX=35889 GN=N PE=1 SV=1//3.46805e-39
MS.gene27185	MS.gene27185	chr2.1:64913557-64920342	1797	0	0.068241	0.420023	0.128035	0.128035	0.068241	0.420023	0	-7.55051	1.45272	1.13065	10.1331	0.00576544	0.2329	0.420849	5.42547e-06	0.452908	1	1	0.00253093	gnl|BL_ORD_ID|59320 sp|A0A0P0XII1|CERK1_ORYSJ Chitin elicitor receptor kinase 1 OS=Oryza sativa subsp. japonica OX=39947 GN=CERK1 PE=1 SV=1//0
MS.gene28617	MS.gene28617	50573:13-2449	1029	#N/A	#N/A	1.12888	2.03599	2.03599	0	1.12888	0	#N/A	-1.04002	11.105	10.1002	#N/A	0.5872	0.00121128	3.2967e-05	#N/A	1	0.144617	0.0105401	gnl|BL_ORD_ID|291180 sp|Q6DIR8|PALD_XENTR Paladin OS=Xenopus tropicalis OX=8364 GN=pald1 PE=2 SV=1//2.52191e-07
MS.gene047377	MS.gene047377	chr2.3:70104678-70109675	1587	#N/A	#N/A	0.532409	0.0429165	0.0429165	0	0.532409	0	#N/A	3.35844	6.65055	10.0469	#N/A	0.061192	0.0881778	1.21788e-05	#N/A	1	1	0.00487387	gnl|BL_ORD_ID|532875 sp|Q9LT96|Y5977_ARATH Probable leucine-rich repeat receptor-like protein kinase At5g49770 OS=Arabidopsis thaliana OX=3702 GN=At5g49770 PE=2 SV=1//5.39795e-115
MS.gene42484	-	chr6.1:68050622-68053912	435	#N/A	#N/A	0.889907	0.0147245	0.0147245	0	0.889907	0	#N/A	5.38615	4.62256	10.0348	#N/A	0.00357826	0.452629	2.21331e-05	#N/A	0.258973	1	0.00775529	gnl|BL_ORD_ID|137649 sp|Q0WSY2|FPP4_ARATH Filament-like plant protein 4 OS=Arabidopsis thaliana OX=3702 GN=FPP4 PE=1 SV=1//1.0631e-24
MS.gene38710	MS.gene38710	chr3.3:84266981-84269413	1335	0	0.378698	1.0832	0.535882	0.535882	0.378698	1.0832	0	-8.46703	0.803533	0.781369	10.027	0.015095	0.652901	0.753214	8.00748e-06	0.763182	1	1	0.00350458	gnl|BL_ORD_ID|12563 sp|Q9M7Q4|AI5L5_ARATH ABSCISIC ACID-INSENSITIVE 5-like protein 5 OS=Arabidopsis thaliana OX=3702 GN=ABF2 PE=1 SV=1//1.75024e-88
MS.gene030623	MS.gene030623	chr4.3:8196796-8210989	5841	0	0.084637	0.186828	0.0199045	0.0199045	0.084637	0.186828	0	-8.84226	2.92056	-1.74182	10.0213	0.0105142	0.0988051	0.489272	1.37824e-05	0.623286	1	1	0.00540454	gnl|BL_ORD_ID|50305 sp|Q3B724|CALS5_ARATH Callose synthase 5 OS=Arabidopsis thaliana OX=3702 GN=CALS5 PE=1 SV=1//0
MS.gene63820	MS.gene63820	chr5.3:75982144-75987110	1602	0	0.0829055	0.523854	0.0345635	0.0345635	0.0829055	0.523854	0	-7.30968	3.63562	-0.938147	10.0037	0.0434831	0.0350344	0.72002	8.36892e-06	1	0.83433	1	0.00362207	gnl|BL_ORD_ID|472582 sp|Q8S9L5|TIG_ARATH Trigger factor-like protein TIG, Chloroplastic OS=Arabidopsis thaliana OX=3702 GN=TIG PE=1 SV=1//0
MS.gene97259	MS.gene97259	chr5.4:21922517-21927799	1485	0	0.226185	0.484398	0.0868395	0.0868395	0.226185	0.484398	0	-8.91062	2.22669	-1.15217	9.98765	0.000440828	0.210102	0.548024	1.13349e-05	0.0905256	1	1	0.00458562	gnl|BL_ORD_ID|12622 sp|Q6J9N8|AIL7_ARATH AP2-like ethylene-responsive transcription factor AIL7 OS=Arabidopsis thaliana OX=3702 GN=AIL7 PE=2 SV=2//8.47816e-141
MS.gene22878	MS.gene22878	chr7.2:1999130-2000700	924	0	0.637813	1.61288	0.964769	0.964769	0.637813	1.61288	0	-8.58455	0.515525	0.885189	9.96911	0.0134616	0.665667	0.642679	9.52424e-06	0.716671	1	1	0.00403248	gnl|BL_ORD_ID|81126 sp|Q4V8K2|CTBL1_RAT Beta-catenin-like protein 1 OS=Rattus norvegicus OX=10116 GN=Ctnnbl1 PE=1 SV=1//3.09012e-29
MS.gene003445	-	chr4.3:32469708-32471866	186	0	0.105762	1.27589	1.08501	1.08501	0.105762	1.27589	0	-5.83898	-0.0804694	4.18411	9.92856	0.120575	0.949835	0.0124864	1.07948e-05	1	1	0.518732	0.00444168	-//-
MS.gene007608	MS.gene007608	chr7.1:9845951-9847230	363	#N/A	#N/A	1.85546	1.26384	1.26384	0	1.85546	0	#N/A	0.343523	9.49596	9.87997	#N/A	0.851909	0.00626466	1.80713e-05	#N/A	1	0.364034	0.00666115	gnl|BL_ORD_ID|367021 sp|O65743|RL24_CICAR 60S ribosomal protein L24 OS=Cicer arietinum OX=3827 GN=RPL24 PE=2 SV=1//5.94411e-75
MS.gene55233	MS.gene55233	chr5.2:30755489-30758036	687	0	0.085683	0.898599	0.20175	0.20175	0.085683	0.898599	0	-6.54906	1.9366	1.36125	9.8362	0.0885649	0.312558	0.591974	0.000116972	1	1	1	0.0276419	gnl|BL_ORD_ID|390249 sp|P42813|RNS1_ARATH Ribonuclease 1 OS=Arabidopsis thaliana OX=3702 GN=RNS1 PE=1 SV=1//1.40794e-116
MS.gene022631	MS.gene022631	chr8.4:79437497-79443055	684	0	0.263601	0.415116	0.355673	0.355673	0.263601	0.415116	0	-9.19525	-0.0100081	0.648284	9.83316	0.000201239	1	0.612391	1.45053e-05	0.0528053	1	1	0.00557577	gnl|BL_ORD_ID|510400 sp|Q93WY4|WRK12_ARATH Probable WRKY transcription factor 12 OS=Arabidopsis thaliana OX=3702 GN=WRKY12 PE=2 SV=1//7.39544e-65
MS.gene28291	-	chr2.1:64687496-64691235	366	0	0.191885	0.623085	0	0	0.191885	0.623085	0	-8.06347	9.79674	-7.99447	9.83038	0.0220064	0.000328248	0.026433	0.000218881	0.923326	0.0616309	0.742759	0.0427284	gnl|BL_ORD_ID|283699 sp|Q9FNK4|OAT_ARATH Ornithine aminotransferase, mitochondrial OS=Arabidopsis thaliana OX=3702 GN=DELTA-OAT PE=1 SV=1//5.54807e-60
XLOC_028474	XLOC_028474	chr1.1:75244230-75248380	1788	0	0.164674	0.556934	0.34029	0.34029	0.164674	0.556934	0	-8.09469	0.451247	1.2657	9.81674	0.0021747	0.752027	0.371228	0.000110854	0.256569	1	1	0.0268198	-
XLOC_111730	XLOC_111730	chr3.2:76869553-76872458	1166	#N/A	#N/A	0.774533	0.760139	0.760139	0	0.774533	0	#N/A	-0.242432	9.94591	9.77841	#N/A	0.904549	0.00386602	0.00021351	#N/A	1	0.283392	0.0421451	-
MS.gene77827	MS.gene77827	chr5.1:80093554-80096118	495	#N/A	#N/A	0.845338	0.0849425	0.0849425	0	0.845338	0	#N/A	3.02593	6.65194	9.74098	#N/A	0.0850796	0.0850692	1.94915e-05	#N/A	1	1	0.00702993	gnl|BL_ORD_ID|260333 sp|Q6GP53|NAA50_XENLA N-alpha-acetyltransferase 50 OS=Xenopus laevis OX=8355 GN=naa50 PE=2 SV=1//9.17601e-51
MS.gene013673	MS.gene013673	chr3.3:75461744-75465874	873	0	0.346537	0.507575	0.105286	0.105286	0.346537	0.507575	0	-9.18959	2.04831	-1.5321	9.69967	0.000453017	0.252032	0.431455	2.67988e-05	0.0922558	1	1	0.00893467	gnl|BL_ORD_ID|10745 sp|P12886|ADH1_PEA Alcohol dehydrogenase 1 OS=Pisum sativum OX=3888 PE=1 SV=1//7.60903e-96
MS.gene043081	MS.gene043081	chr4.2:72933206-72937044	1200	0	0.126336	0.55133	0.335257	0.335257	0.126336	0.55133	0	-7.58451	0.446078	1.65988	9.6917	0.00769903	0.733771	0.258987	5.51585e-05	0.528762	1	1	0.0159474	-//-
MS.gene022213	MS.gene022213	chr3.3:67000079-67005891	450	0	0.300936	0.420679	0.743847	0.743847	0.300936	0.420679	0	-8.90225	-1.11464	1.89211	9.67004	0.000410913	0.378838	0.166376	2.44914e-05	0.0867778	1	1	0.0084052	gnl|BL_ORD_ID|494523 sp|F8WKW1|UGT2_GARJA 7-deoxyloganetin glucosyltransferase OS=Gardenia jasminoides OX=114476 GN=UGT85A24 PE=1 SV=1//3.55339e-49
MS.gene036157	MS.gene036157	chr1.3:50823218-50826415	687	0	1.90008	0.649752	0.0227455	0.0227455	1.90008	0.649752	0	-11.1735	4.42782	-5.94378	9.66369	0.000944398	0.0213065	0.0270511	0.000124994	0.152347	0.657425	0.749252	0.0290095	gnl|BL_ORD_ID|39539 sp|P13089|AUX28_SOYBN Auxin-induced protein AUX28 OS=Glycine max OX=3847 GN=AUX28 PE=2 SV=1//4.12246e-84
MS.gene40296	MS.gene40296	chr3.2:87977469-87981334	1752	0	0.143728	0.532192	0.136206	0.136206	0.143728	0.532192	0	-7.74791	1.69139	0.219056	9.65191	0.0296898	0.202066	0.924716	4.18823e-05	1	1	1	0.0127619	gnl|BL_ORD_ID|55213 sp|Q94IR2|CCD1_PHAVU Carotenoid 9,10(9&apos;,10&apos;)-cleavage dioxygenase 1 OS=Phaseolus vulgaris OX=3885 GN=CCD1 PE=1 SV=1//1.23657e-67
MS.gene04946	MS.gene04946	chr3.4:67305175-67306898	912	0	0.311685	1.18062	0.076414	0.076414	0.311685	1.18062	0	-7.69662	3.59226	-1.62642	9.65137	0.0306993	0.0126626	0.460328	2.76065e-05	1	0.509525	1	0.00916473	gnl|BL_ORD_ID|129403 sp|Q9S9V9|FBL23_ARATH Putative F-box/LRR-repeat protein 23 OS=Arabidopsis thaliana OX=3702 GN=FBL23 PE=4 SV=1//1.69783e-08
MS.gene013793	MS.gene013793	24249:7177-13357	1856	0	0.270933	0.327085	0.126869	0.126869	0.270933	0.327085	0	-9.4104	1.09947	-0.884787	9.63467	0.000274271	0.381011	0.533694	2.9444e-05	0.0647848	1	1	0.00962434	gnl|BL_ORD_ID|449228 sp|Q9XI07|SWI3C_ARATH SWI/SNF complex subunit SWI3C OS=Arabidopsis thaliana OX=3702 GN=SWI3C PE=1 SV=1//1.74122e-55
MS.gene02490	MS.gene02490	chr3.4:82474965-82477575	807	0	0.279207	0.753453	0.462583	0.462583	0.279207	0.753453	0	-8.17424	0.476854	0.963185	9.60533	0.00219115	0.700089	0.482123	3.00798e-05	0.257711	1	1	0.00977748	gnl|BL_ORD_ID|312427 sp|O49292|PPD4_ARATH PsbP domain-containing protein 4, chloroplastic OS=Arabidopsis thaliana OX=3702 GN=PPD4 PE=1 SV=2//4.37647e-123
MS.gene66733	MS.gene66733	chr4.3:47297206-47300066	894	0	0.088072	0.682211	0.442429	0.442429	0.088072	0.682211	0	-6.62328	0.391873	2.5956	9.59591	0.0835213	0.750103	0.164669	3.05881e-05	1	1	1	0.00991513	gnl|BL_ORD_ID|381730 sp|Q42064|RL83_ARATH 60S ribosomal protein L8-3 OS=Arabidopsis thaliana OX=3702 GN=RPL8C PE=2 SV=2//1.67248e-29
MS.gene006917	MS.gene006917	chr4.3:27647621-27649894	546	#N/A	#N/A	0.843287	0.564013	0.564013	0	0.843287	0	#N/A	0.365719	9.15872	9.57659	#N/A	0.845447	0.00838899	6.52394e-05	#N/A	1	0.427062	0.0181094	gnl|BL_ORD_ID|554567 sp|P42856|ZB14_MAIZE 14 kDa zinc-binding protein OS=Zea mays OX=4577 GN=ZBP14 PE=1 SV=1//8.05555e-61
MS.gene47811	MS.gene47811	chr2.1:3386124-3387589	441	0	0.484832	1.31786	1.49326	1.49326	0.484832	1.31786	0	-8.16821	-0.430459	1.81188	9.56255	0.00208149	0.817613	0.366135	4.20043e-05	0.249177	1	1	0.0127824	gnl|BL_ORD_ID|318889 sp|O04006|PSAH_BRACM Photosystem I reaction center subunit VI, chloroplastic OS=Brassica campestris OX=3711 GN=PSAH PE=2 SV=1//3.06085e-55
MS.gene057339	MS.gene057339	chr3.1:57796019-57797591	627	#N/A	#N/A	1.20028	0.068447	0.068447	0	1.20028	0	#N/A	3.85911	5.62938	9.54646	#N/A	0.0117312	0.136857	3.84659e-05	#N/A	0.490243	1	0.0119866	gnl|BL_ORD_ID|176769 sp|Q5NAY4|HISX_ORYSJ Histidinol dehydrogenase, chloroplastic OS=Oryza sativa subsp. japonica OX=39947 GN=HDH PE=2 SV=1//5.59512e-36
MS.gene025115	MS.gene025115	chr2.4:50435216-50438204	705	0	0.524155	0.623097	0.205732	0.205732	0.524155	0.623097	0	-9.2232	1.35894	-1.04613	9.51808	0.00182404	0.449918	0.627171	4.27364e-05	0.229426	1	1	0.0129542	-//-
MS.gene053227	MS.gene053227	chr4.2:92828863-92833745	918	0	0.197025	0.371565	0.0619465	0.0619465	0.197025	0.371565	0	-8.61178	2.33808	-1.43736	9.51097	0.00113327	0.22233	0.455111	0.000189013	0.172483	1	1	0.0390236	gnl|BL_ORD_ID|270367 sp|Q9SAI4|NIP61_ARATH Aquaporin NIP6-1 OS=Arabidopsis thaliana OX=3702 GN=NIP6-1 PE=1 SV=1//3.25304e-110
MS.gene008323	-	chr3.1:54213365-54217519	678	0	0.156356	0.434775	0.0445125	0.0445125	0.156356	0.434775	0	-7.95852	3.02301	-1.45933	9.48895	0.0240791	0.0989278	0.567659	8.8172e-05	0.964039	1	1	0.0227631	gnl|BL_ORD_ID|275051 sp|Q5QGZ8|NRL4A_LUPAN Bifunctional nitrilase/nitrile hydratase NIT4A OS=Lupinus angustifolius OX=3871 GN=NIT4A PE=1 SV=1//1.85831e-20
MS.gene49022	MS.gene49022	chr7.3:48151834-48160531	3384	#N/A	#N/A	0.205002	0.045712	0.045712	0	0.205002	0	#N/A	1.89886	7.47861	9.45033	#N/A	0.308955	0.0397786	0.00016509	#N/A	1	0.883199	0.0356451	gnl|BL_ORD_ID|475791 sp|Q40392|TMVRN_NICGU TMV resistance protein N OS=Nicotiana glutinosa OX=35889 GN=N PE=1 SV=1//6.51228e-74
MS.gene66573	MS.gene66573	chr6.2:62059921-62063171	1728	0	0.0104085	0.541753	0.560136	0.560136	0.0104085	0.541753	0	-3.98449	-0.268984	5.72401	9.44545	0.551852	0.885861	0.0381236	4.76225e-05	1	1	0.870335	0.0141602	gnl|BL_ORD_ID|78371 sp|O65468|CRK8_ARATH Cysteine-rich receptor-like protein kinase 8 OS=Arabidopsis thaliana OX=3702 GN=CRK8 PE=3 SV=2//6.46691e-15
XLOC_312484	XLOC_312484	chr8.2:82079326-82083453	2519	0	0.180584	0.418345	0.159933	0.159933	0.180584	0.418345	0	-8.26921	1.14138	-0.0149167	9.41224	0.0181817	0.393613	1	5.24989e-05	0.840781	1	1	0.0152988	-
MS.gene92296	MS.gene92296	chr5.1:1129076-1131437	921	0	0.018237	0.718623	0.326913	0.326913	0.018237	0.718623	0	-4.29469	0.936706	4.19657	9.41115	0.345399	0.626497	0.0738543	0.0001915	1	1	1	0.0393356	gnl|BL_ORD_ID|448441 sp|B2TPM3|SURE_CLOBB 5&apos;-nucleotidase SurE OS=Clostridium botulinum (strain Eklund 17B / Type B) OX=935198 GN=surE PE=3 SV=1//1.61764e-39
MS.gene24953	MS.gene24953	chr4.1:82607696-82610380	513	0	0.0806125	0.640454	0.305864	0.305864	0.0806125	0.640454	0	-6.38489	0.846652	2.19971	9.40977	0.10697	0.6405	0.397161	5.06392e-05	1	1	1	0.0148494	gnl|BL_ORD_ID|3300 sp|Q8H151|AAE13_ARATH Malonate--CoA ligase OS=Arabidopsis thaliana OX=3702 GN=AAE13 PE=1 SV=2//4.72369e-63
MS.gene52570	MS.gene52570	chr7.4:26137862-26138165	304	0.179636	31.6207	145.231	70.512	70.512	31.6207	145.231	0.179636	-7.20407	0.846036	1.31462	9.40822	0.0014673	0.610317	0.529866	1.21008e-10	0.201632	1	1	2.35674e-07	-//-
[truncated: 1,080 more rows]

## Sheet: Table S4.
Table S4. List of differentially expressed lncRNAs (DE lncRNAs) in four groups based on pairwise comparisons. Items highlighted in red mean up-regulated, while in green mean down-regulated.
[truncated: 1,469 more rows]

## Sheet: Table S5.
Table S5. The enriched GO terms of all DE mRNAs in four comparisons. The GO terms with P-value < 0.05 were considered significantly enriched among the DE mRNAs.
[truncated: 497 more rows]

[truncated: 6 more sheets: Table S6., Table S7., Table S8., Table S9., Table S10., Table S11.]
